# Supplementary material
Source: MDPI journal article supplement (https://www.mdpi.com/2304-6740/6/1/23)
Supplement: s1 [file s1]

Archive with 8 entries (8 files):
- species_3.cif
- species_4.cif
- checkcif-2.pdf
- checkcif-3.pdf
- checkcif-4.pdf
- Checkcifs.pdf
- inorganics-260697-supplementary.docx
- species_2.cif
