# Supplementary material
Source: MDPI journal article supplement (https://www.mdpi.com/2304-6740/6/1/23)
Supplement: s1 [file s1 › inorganics-260697-supplementary.docx]

**Supporting Information**

**For**

**Sterically bulky NHC adducts of GaMe3 and InMe3 for H2 activation and lactide polymerisation**

Anaëlle Bolley, Gilles Schnee, Béatrice Jacques and Samuel Dagorne*

*Institut de Chimie de Strasbourg, CNRS-Université de Strasbourg
1 rue Blaise Pascal, 67000 Strasbourg, France
E-mail: dagorne@unistra.fr*


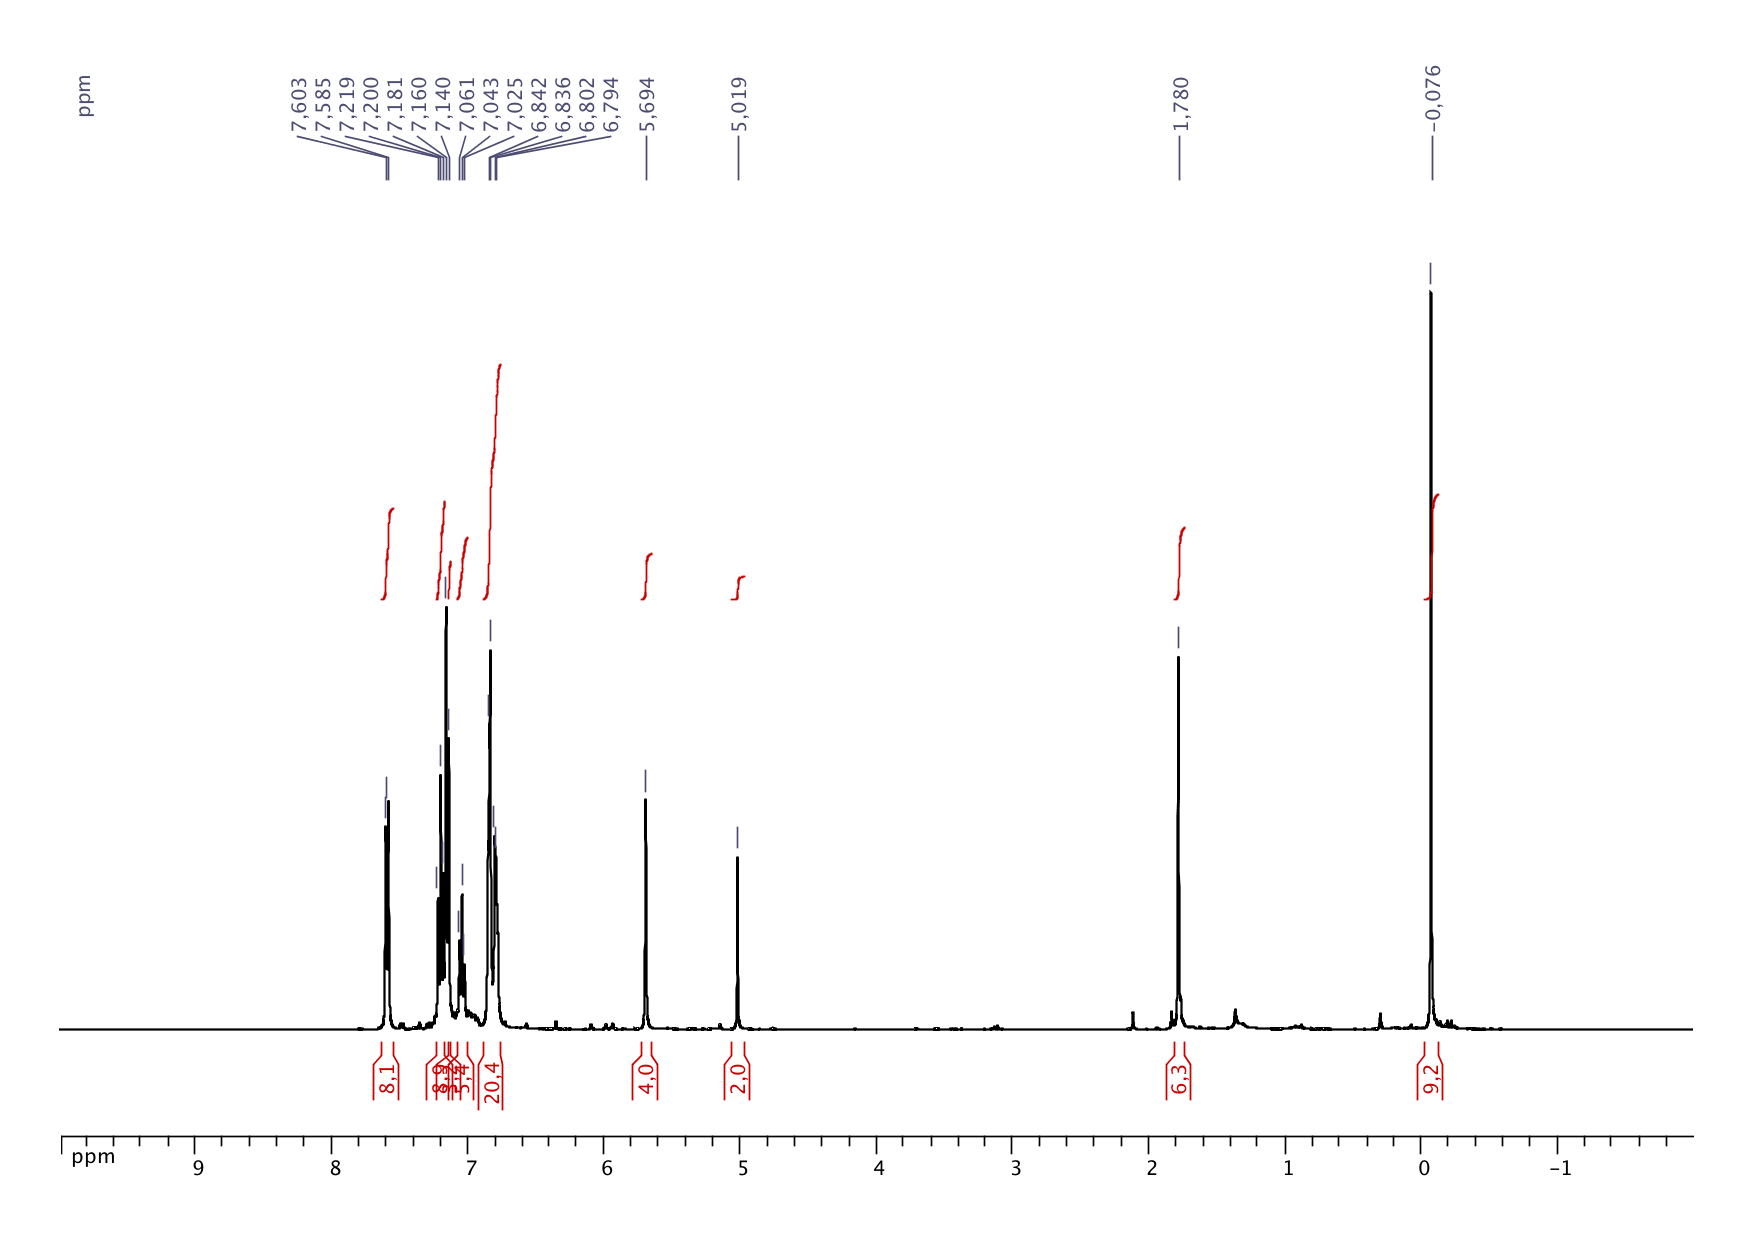


**Figure S1.** 1H NMR (400 MHz, C6D6) of adduct (IPr*)GaMe3 (**1**)


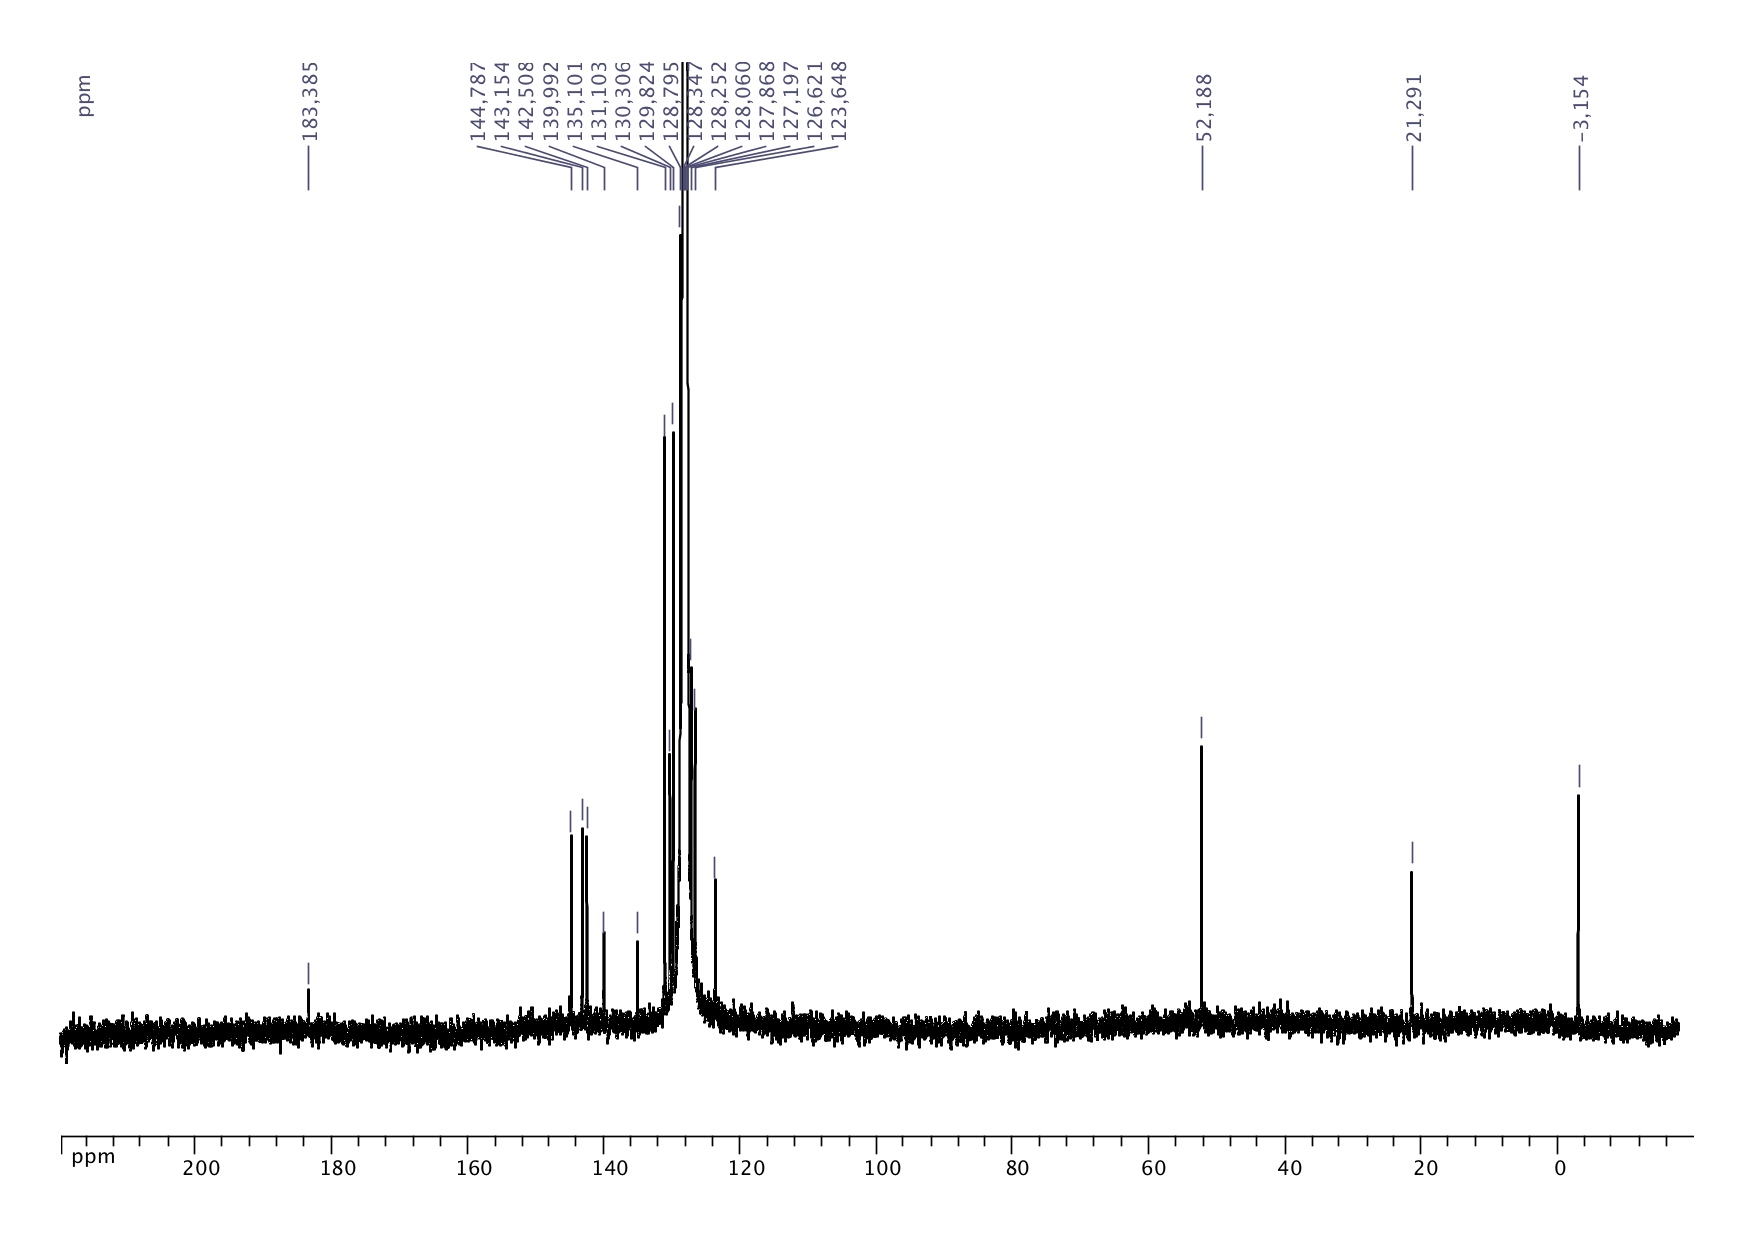


**Figure S2.** 13C{1H} NMR (125.8 MHz, C6D6) of adduct (IPr*)GaMe3 (**1**)


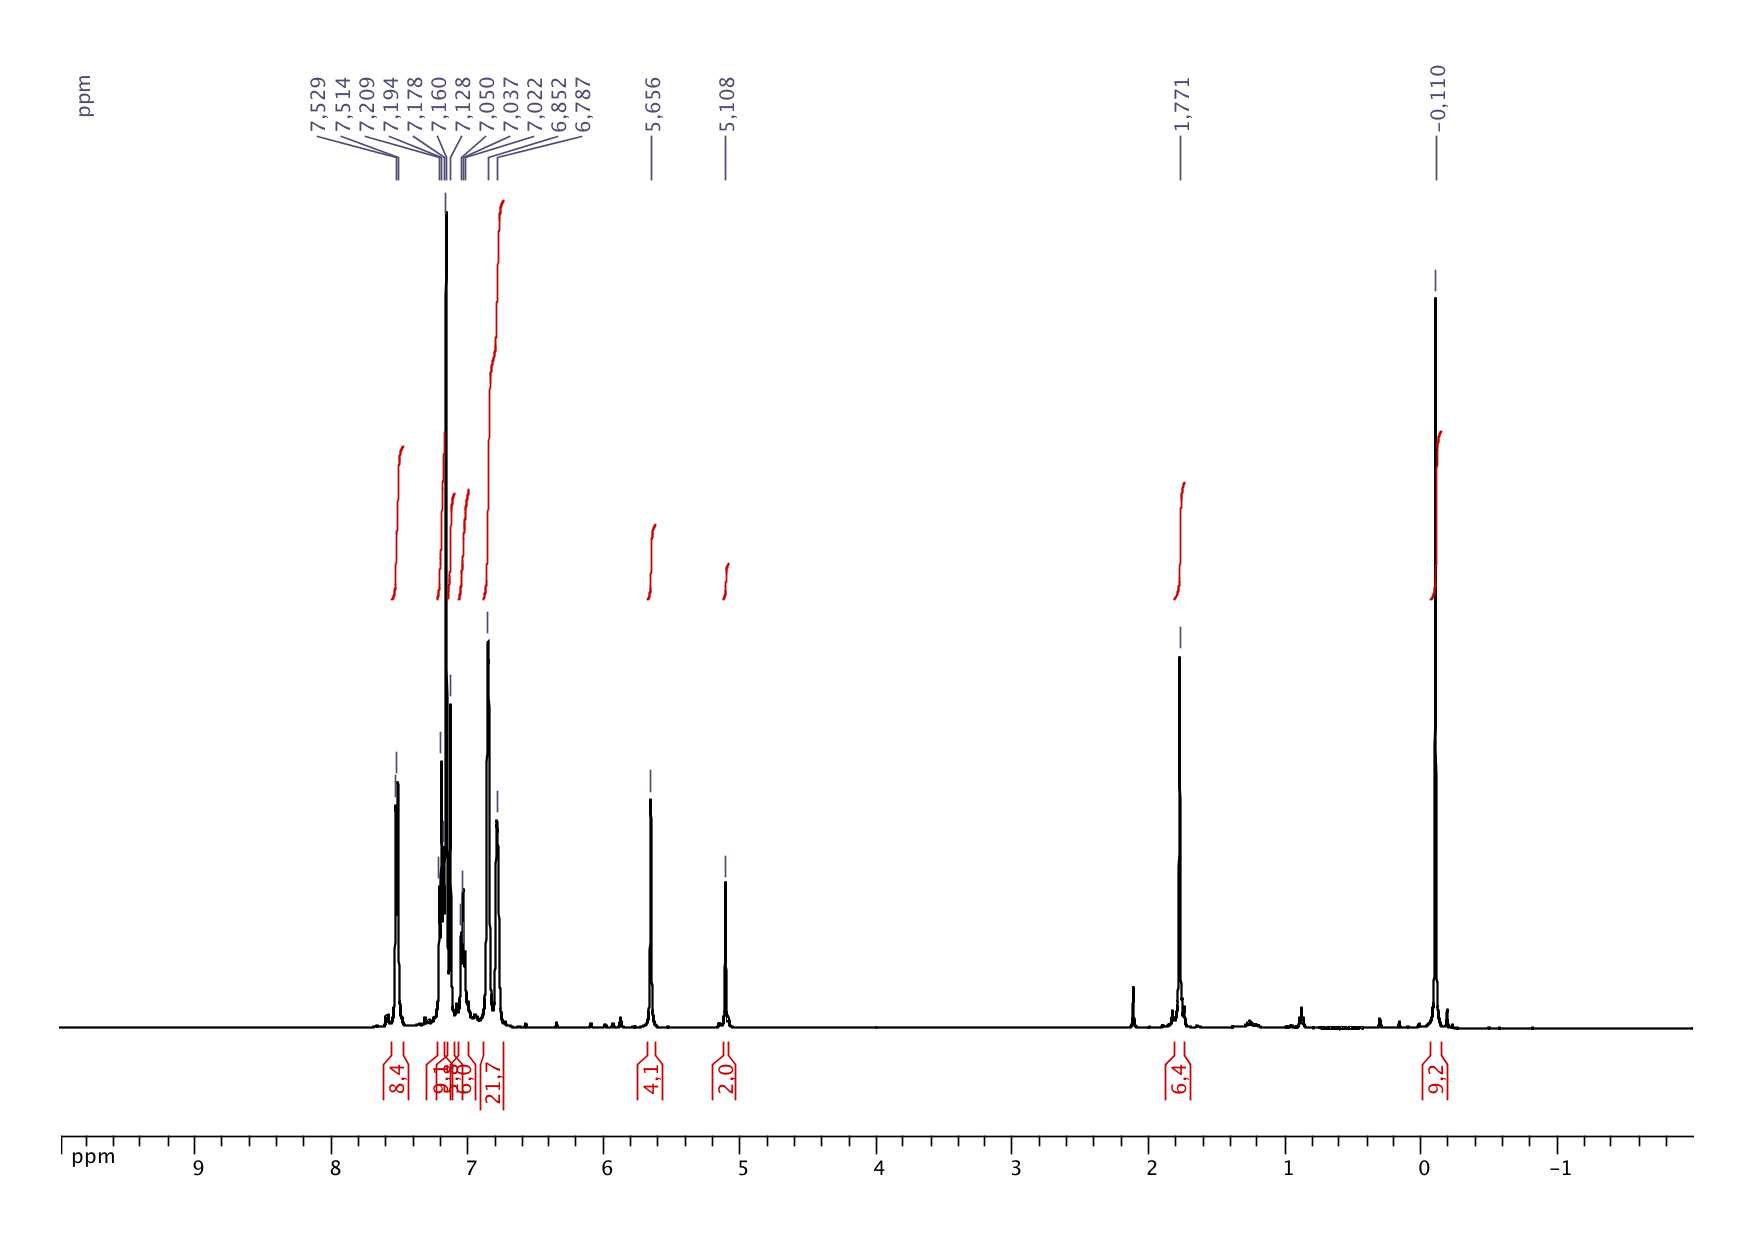


**Figure S3.**1H NMR (500 MHz, C6D6) of adduct (IPr*)InMe3 (**2**)


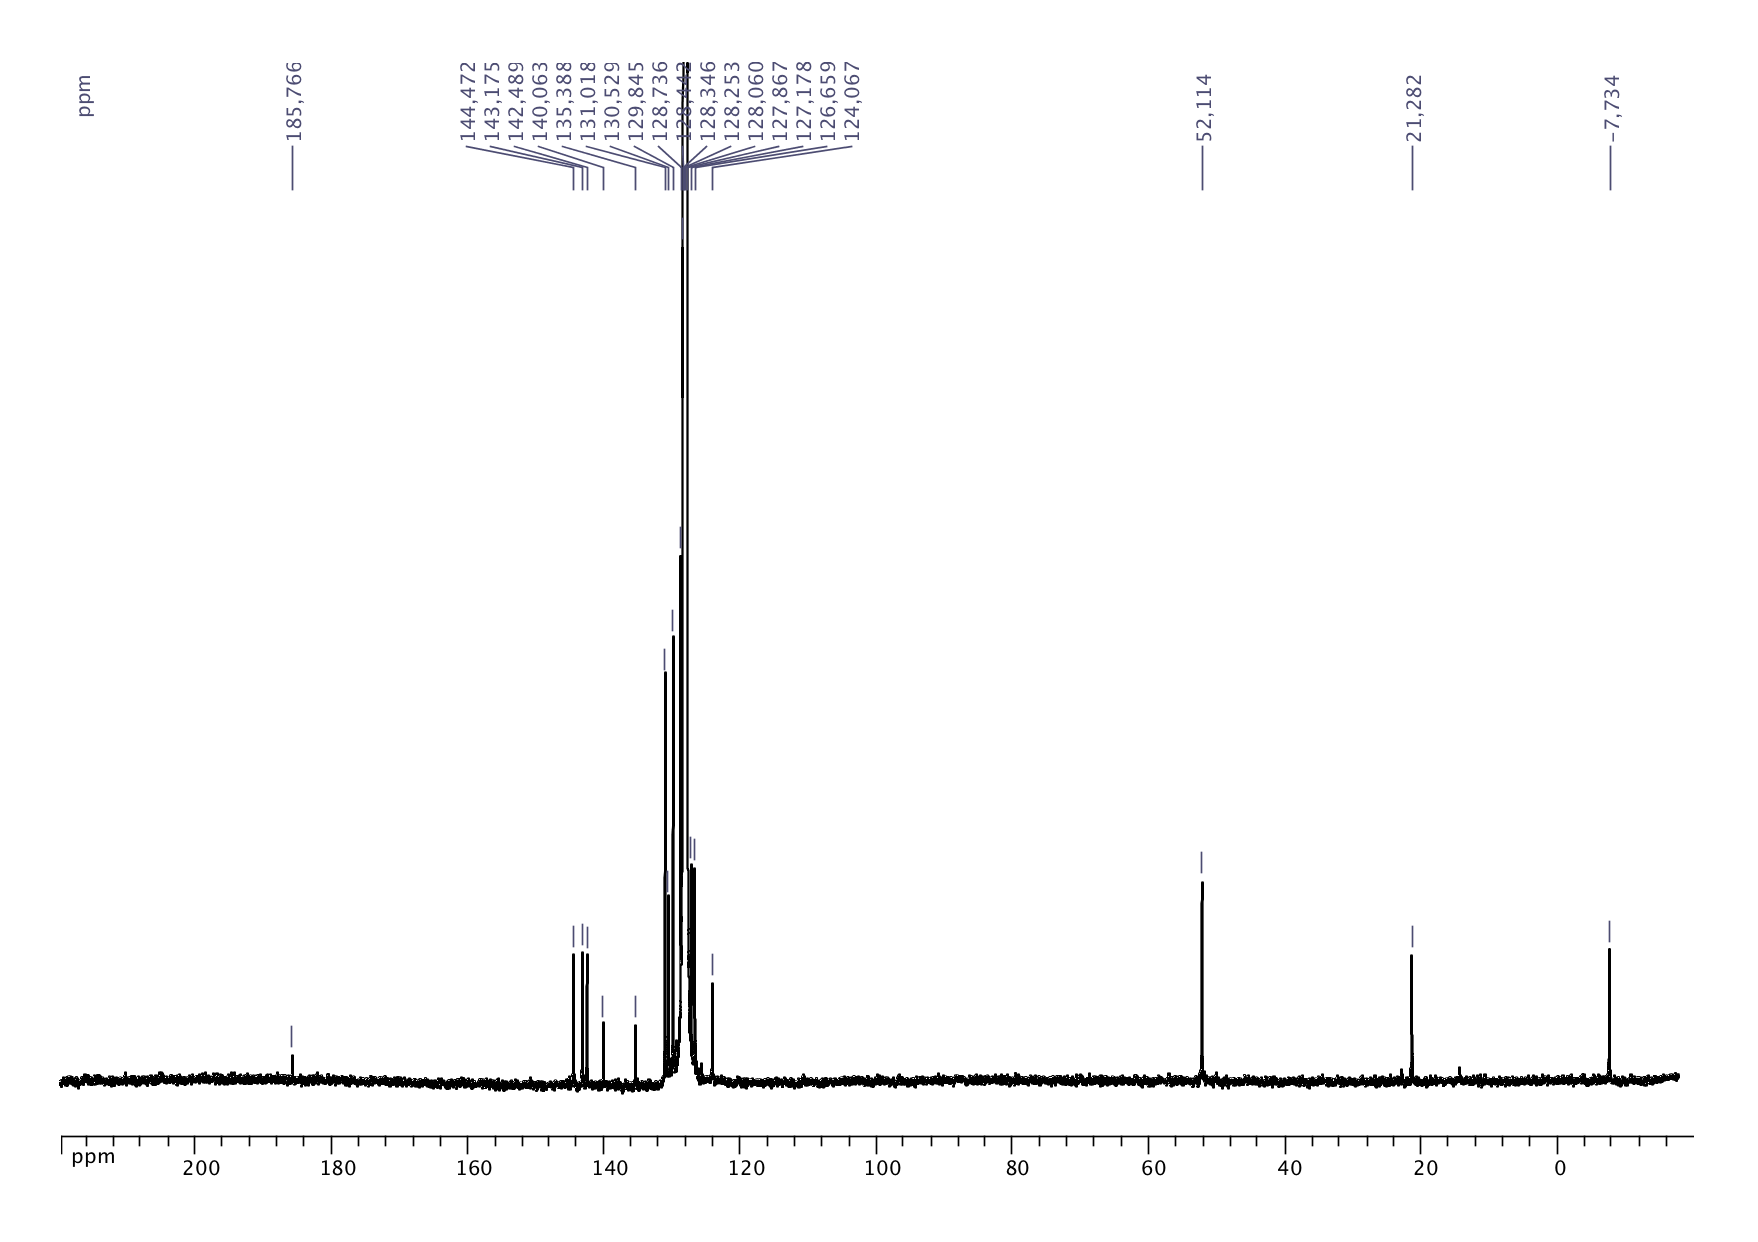


**Figure S4.**13C**{**1H} NMR (500 MHz, C6D6) of adduct (IPr*)InMe3 (**2**)

**Figure S5.**1H NMR (500 MHz, C6D6) of adduct (S*t*Bu)GaMe3 (**3**)


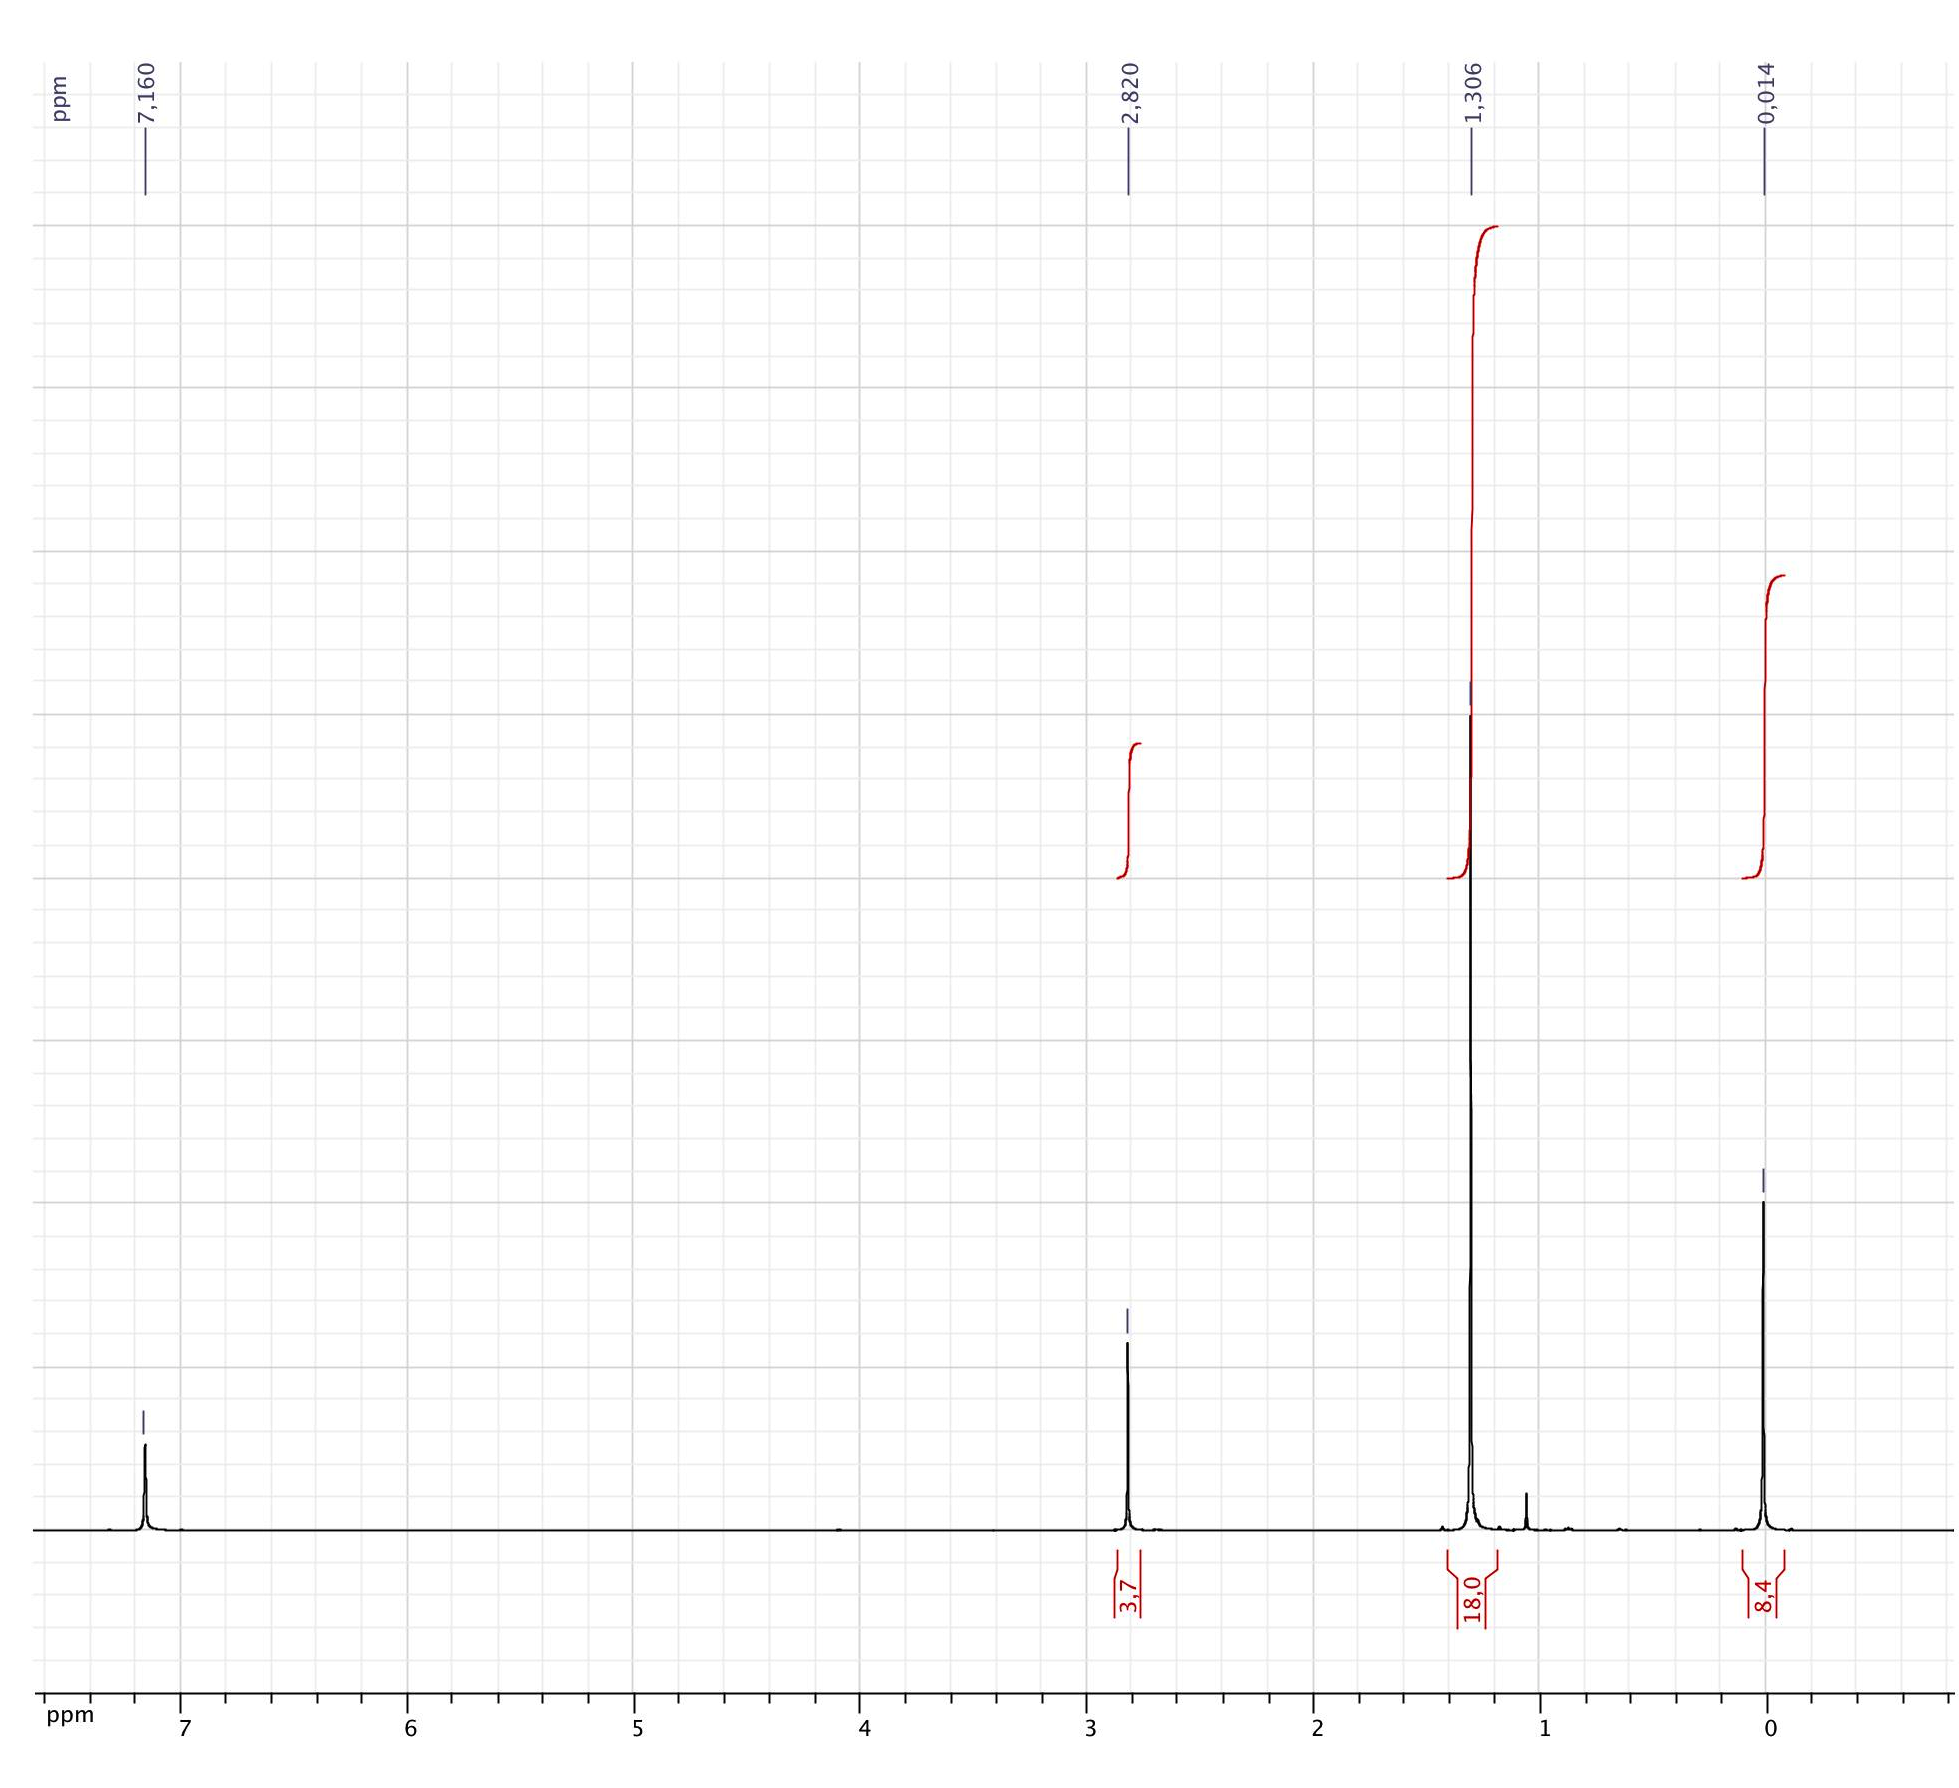


**Figure S6.**1H NMR (500 MHz, C6D6) of adduct (S*t*Bu)InMe3 (**4**)


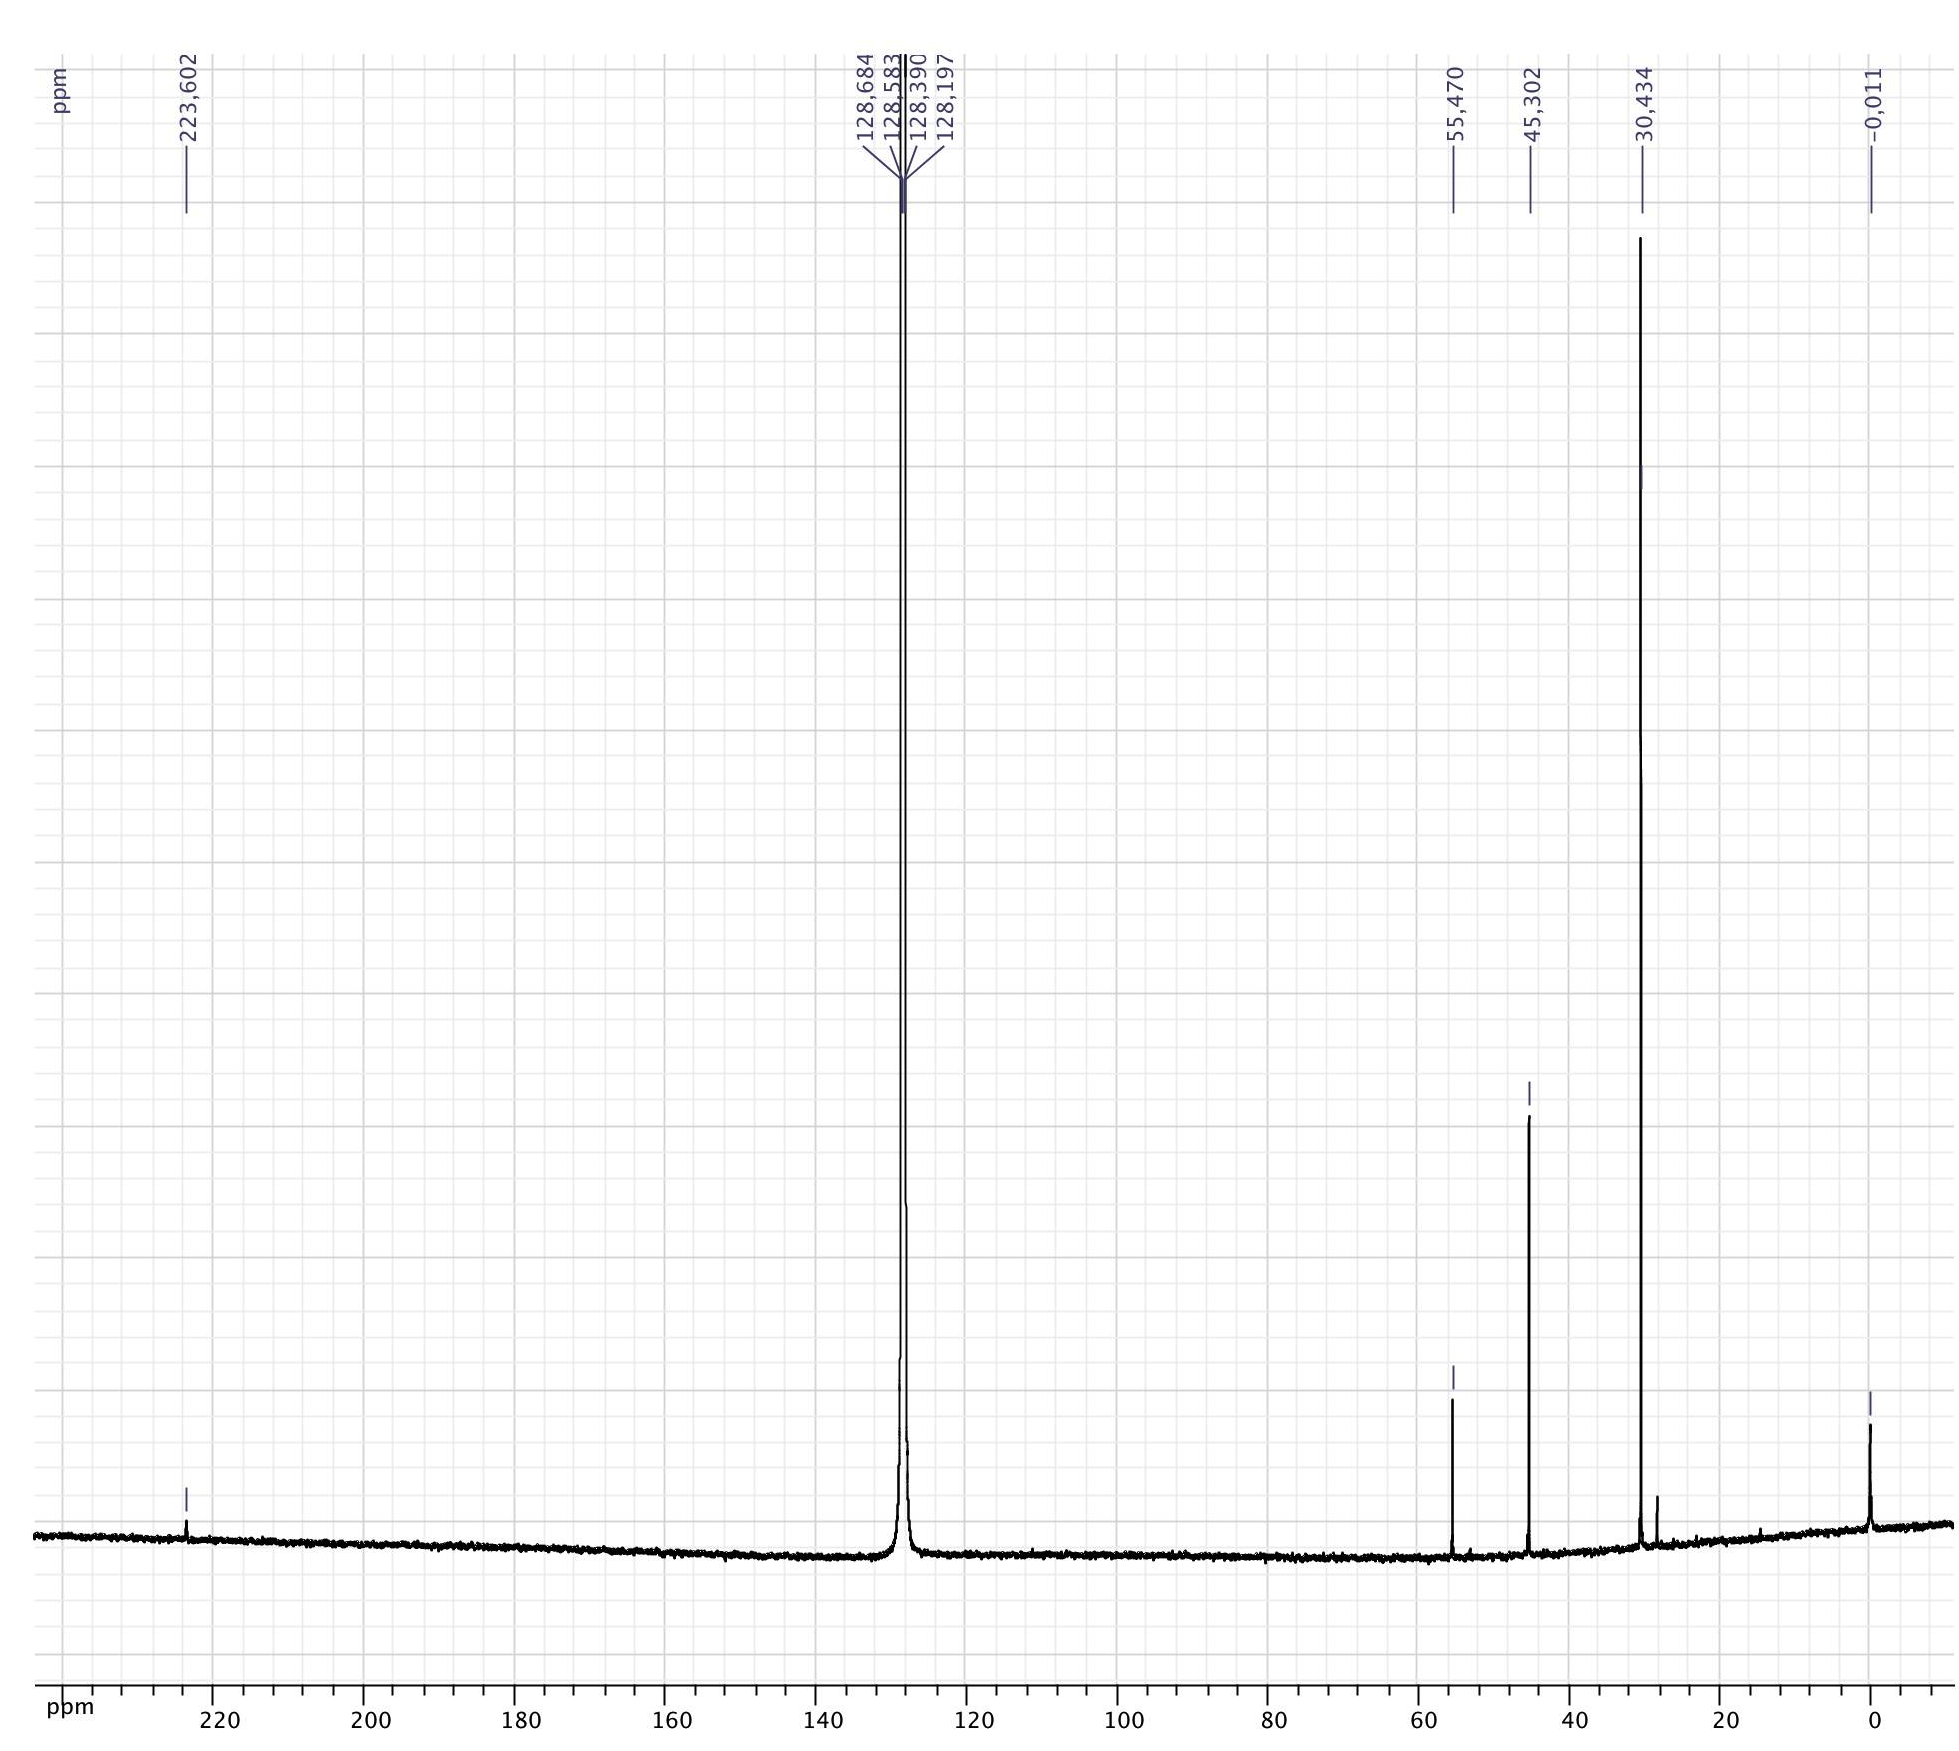


**Figure S7.**13C**{**1H} NMR (500 MHz, C6D6) of adduct (S*t*Bu)InMe3 (**4**)


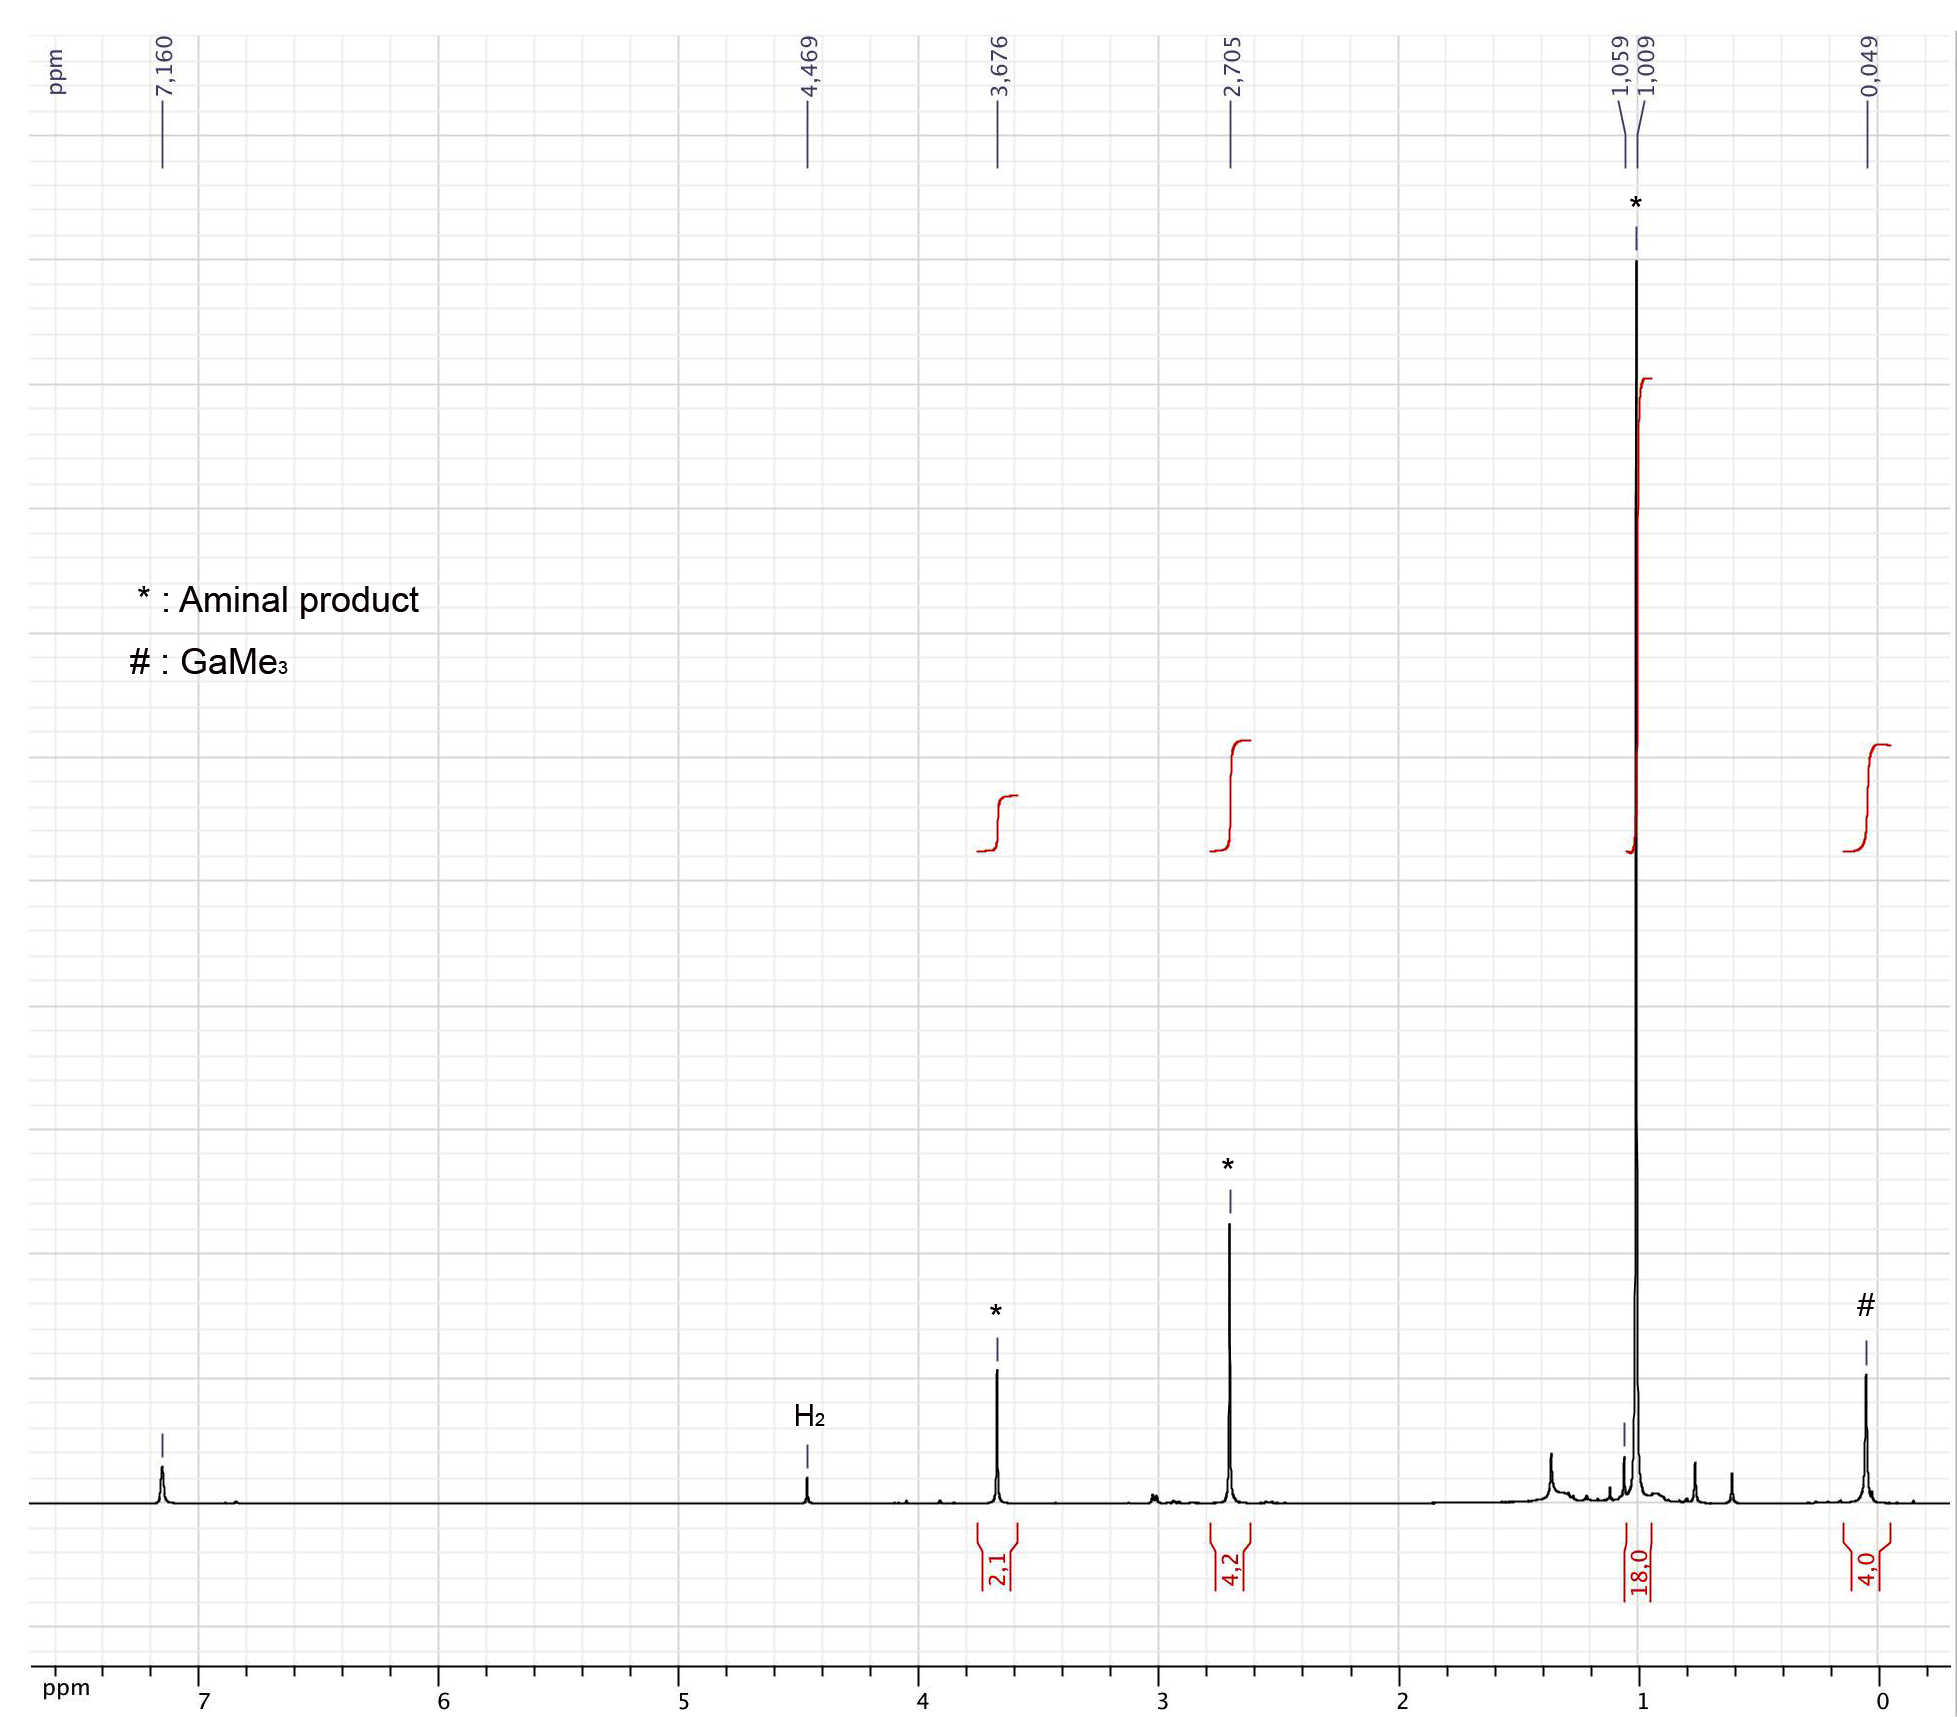


**Figure S8.** Reaction of a 0.4/1 GaMe3 mixture with H2 (1 bar H2, RT, 5 min) showing the quantitative formation of the aminal product.


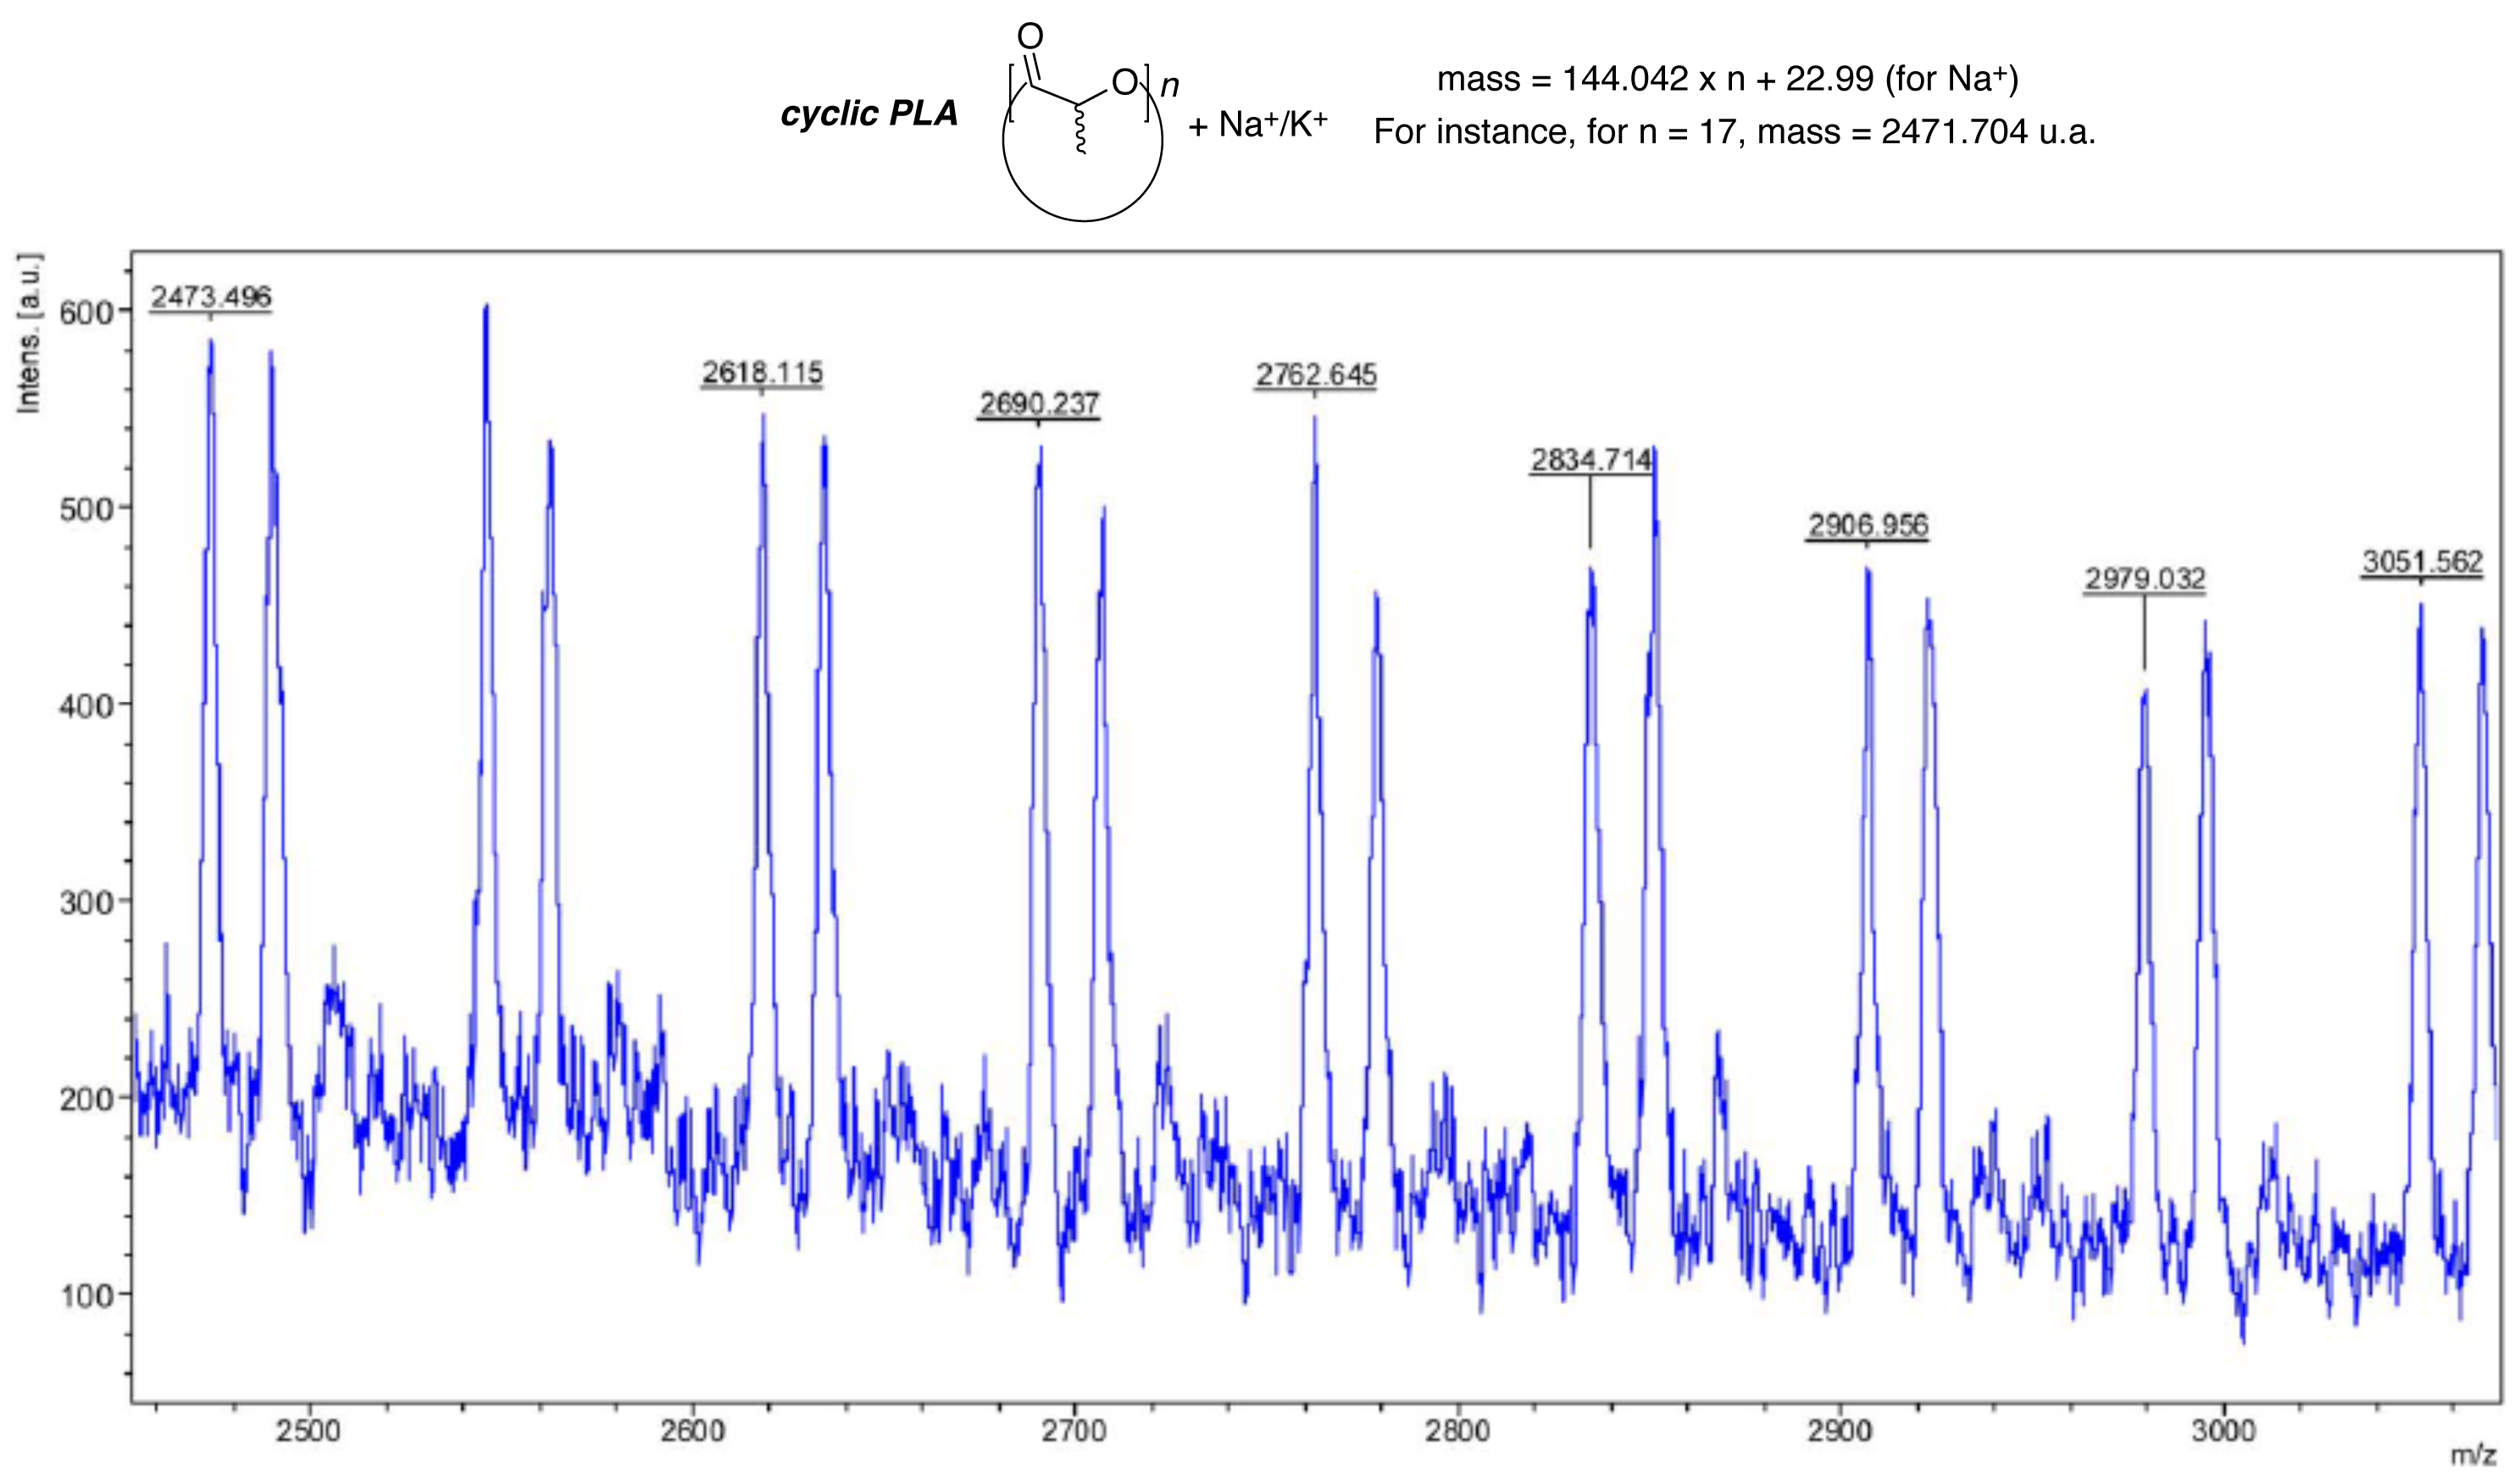


**Figure S9.** Zoom-in of the MALDI-TOF mass spectrum of the PLA produced *via* ROP of *rac*-LA initiated by species **3** (toluene, RT).


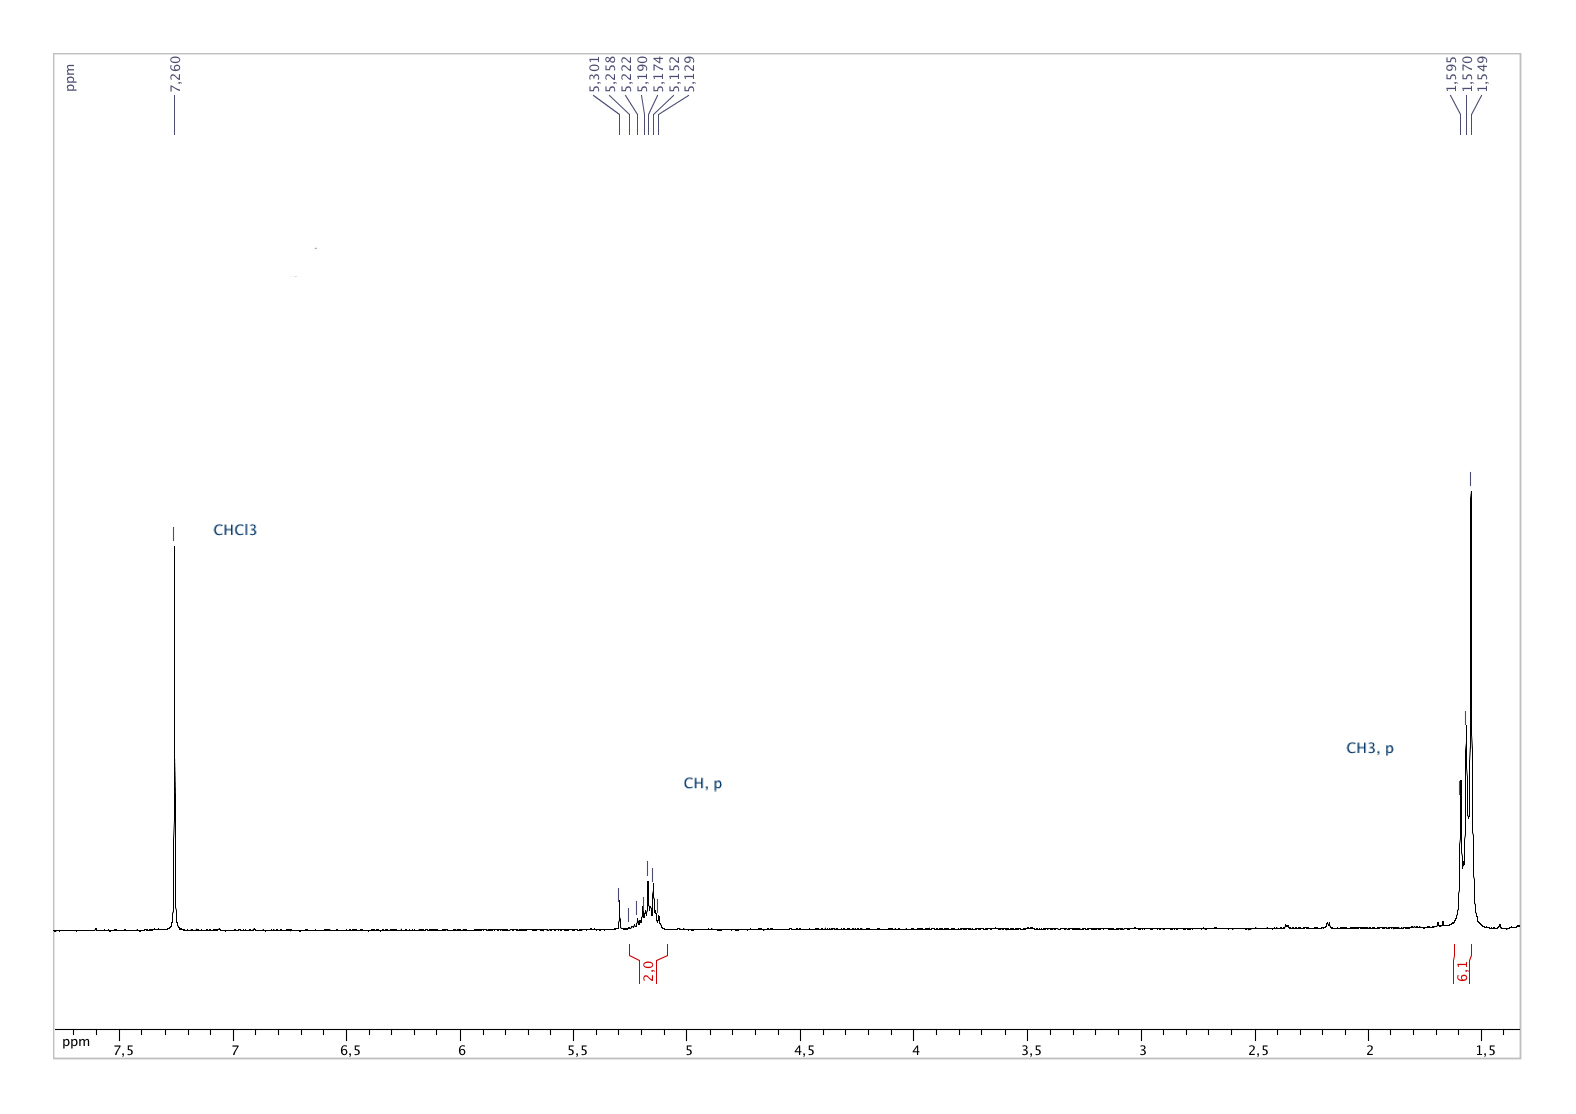


**Figure S10.** 1H NMR spectrum (CDCl3) of isolated cyclic PLA produced by ROP of *rac*-lactide with initiator **3** (Conditions: 100 equiv of *rac*-lactide, 18h, toluene, quantitative conversion).
