# Supplementary material
Source: MDPI journal article supplement (https://www.mdpi.com/2304-6740/6/1/23)
Supplement: s1 [file s1 › species_2.cif]

 
data_sdab151112
 
_audit_creation_method            SHELXL-2013
_chemical_name_systematic
;
 ?
;
_chemical_name_common             ?
_chemical_melting_point           ?
_chemical_formula_moiety          'C72 H65 In N2' 
_chemical_formula_sum
 'C72 H65 In N2' 
_chemical_formula_weight          1073.08

loop_
 _atom_type_symbol
 _atom_type_description
 _atom_type_scat_dispersion_real
 _atom_type_scat_dispersion_imag
 _atom_type_scat_source
 'C'  'C'   0.0033   0.0016
 'International Tables Vol C Tables 4.2.6.8 and 6.1.1.4'
 'H'  'H'   0.0000   0.0000
 'International Tables Vol C Tables 4.2.6.8 and 6.1.1.4'
 'N'  'N'   0.0061   0.0033
 'International Tables Vol C Tables 4.2.6.8 and 6.1.1.4'
 'In'  'In'  -0.7276   1.3100
 'International Tables Vol C Tables 4.2.6.8 and 6.1.1.4'
 
_space_group_crystal_system       triclinic
_space_group_IT_number            2
_space_group_name_H-M_alt         'P -1'
_space_group_name_Hall            '-P 1'
 
_shelx_space_group_comment
;
The symmetry employed for this shelxl refinement is uniquely defined
by the following loop, which should always be used as a source of
symmetry information in preference to the above space-group names.
They are only intended as comments.
;
 
loop_
 _space_group_symop_operation_xyz
 'x, y, z'
 '-x, -y, -z'
 
_cell_length_a                    11.7755(10)
_cell_length_b                    19.8637(17)
_cell_length_c                    24.519(2)
_cell_angle_alpha                 96.283(2)
_cell_angle_beta                  93.717(2)
_cell_angle_gamma                 90.052(2)
_cell_volume                      5688.5(9)
_cell_formula_units_Z             4
_cell_measurement_temperature     173(2)
_cell_measurement_reflns_used     6741
_cell_measurement_theta_min       2.28
_cell_measurement_theta_max       26.86
 
_exptl_crystal_description        'plate'
_exptl_crystal_colour             'colourless'
_exptl_crystal_density_meas       ? 
_exptl_crystal_density_method     ?              
_exptl_crystal_density_diffrn     1.253          
_exptl_crystal_F_000              2240
_exptl_transmission_factor_min    ?                                             
_exptl_transmission_factor_max    ?                                             
_exptl_crystal_size_max           0.180
_exptl_crystal_size_mid           0.120
_exptl_crystal_size_min           0.080
_exptl_absorpt_coefficient_mu     0.460
_shelx_estimated_absorpt_T_min    0.922
_shelx_estimated_absorpt_T_max    0.964
_exptl_absorpt_correction_type    'multi-scan'
_exptl_absorpt_correction_T_min   0.6595
_exptl_absorpt_correction_T_max   0.7456
_exptl_absorpt_process_details    'sadabs'
 
_exptl_special_details
;
 ?
;
 
_diffrn_ambient_temperature       173(2)
_diffrn_radiation_wavelength      0.71073
_diffrn_radiation_type            MoK\a
_diffrn_radiation_monochromator   'triumph'
_diffrn_source                    'sealed tube'                       
_diffrn_measurement_device_type   'Bruker APEX-II CCD'
_diffrn_measurement_method        '\f and \w scans'
_diffrn_detector_area_resol_mean  ? 
_diffrn_reflns_number             77431
_diffrn_reflns_av_unetI/netI      0.2265
_diffrn_reflns_av_R_equivalents   0.1545
_diffrn_reflns_limit_h_min        -14
_diffrn_reflns_limit_h_max        15
_diffrn_reflns_limit_k_min        -26
_diffrn_reflns_limit_k_max        26
_diffrn_reflns_limit_l_min        -32
_diffrn_reflns_limit_l_max        32
_diffrn_reflns_theta_min          1.031
_diffrn_reflns_theta_max          28.051
_diffrn_reflns_theta_full         25.242
_diffrn_measured_fraction_theta_max   0.995
_diffrn_measured_fraction_theta_full  1.000
_diffrn_reflns_Laue_measured_fraction_max    0.995
_diffrn_reflns_Laue_measured_fraction_full   1.000
_diffrn_reflns_point_group_measured_fraction_max   0.995
_diffrn_reflns_point_group_measured_fraction_full  1.000
_reflns_number_total              27504
_reflns_number_gt                 12789
_reflns_threshold_expression      'I > 2\s(I)'
_reflns_Friedel_coverage          0.000
_reflns_Friedel_fraction_max      .
_reflns_Friedel_fraction_full     .
 
_reflns_special_details
;
 Reflections were merged by SHELXL according to the crystal
 class for the calculation of statistics and refinement.
 
 _reflns_Friedel_fraction is defined as the number of unique
 Friedel pairs measured divided by the number that would be
 possible theoretically, ignoring centric projections and
 systematic absences.
;
 
_computing_data_collection       'Bruker APEX2'
_computing_cell_refinement       'Bruker SAINT'
_computing_data_reduction        'Bruker SAINT'
_computing_structure_solution    'SHELXS-2013 (Sheldrick, 2013)'
_computing_structure_refinement  'SHELXL-2013 (Sheldrick, 2013)'
_computing_molecular_graphics    'Mercury (Macrae et al., 2008)'
_computing_publication_material  'SHELXL-2013 (Sheldrick, 2013)'
 
_refine_special_details
;
 ?
;
_refine_ls_structure_factor_coef  Fsqd
_refine_ls_matrix_type            full
_refine_ls_weighting_scheme       calc
_refine_ls_weighting_details
'w=1/[\s^2^(Fo^2^)+(0.0413P)^2^] where P=(Fo^2^+2Fc^2^)/3'
_atom_sites_solution_primary      direct
_atom_sites_solution_secondary    difmap
_atom_sites_solution_hydrogens    geom
_refine_ls_hydrogen_treatment     constr
_refine_ls_extinction_method      none
_refine_ls_extinction_coef        .
_refine_ls_number_reflns          27504
_refine_ls_number_parameters      1331
_refine_ls_number_restraints      0
_refine_ls_R_factor_all           0.2006
_refine_ls_R_factor_gt            0.0886
_refine_ls_wR_factor_ref          0.1438
_refine_ls_wR_factor_gt           0.1187
_refine_ls_goodness_of_fit_ref    0.987
_refine_ls_restrained_S_all       0.987
_refine_ls_shift/su_max           0.000
_refine_ls_shift/su_mean          0.000
 
loop_
 _atom_site_label
 _atom_site_type_symbol
 _atom_site_fract_x
 _atom_site_fract_y
 _atom_site_fract_z
 _atom_site_U_iso_or_equiv
 _atom_site_adp_type
 _atom_site_occupancy
 _atom_site_site_symmetry_order  
 _atom_site_calc_flag
 _atom_site_refinement_flags_posn
 _atom_site_refinement_flags_adp
 _atom_site_refinement_flags_occupancy
 _atom_site_disorder_assembly
 _atom_site_disorder_group
C1 C -0.0418(4) 0.2773(2) 0.22712(19) 0.0149(11) Uani 1 1 d . . . . .
C2 C -0.2090(4) 0.2259(2) 0.2394(2) 0.0206(12) Uani 1 1 d . . . . .
H2 H -0.2878 0.2196 0.2438 0.025 Uiso 1 1 calc R U . . .
C3 C -0.1293(4) 0.1782(2) 0.2396(2) 0.0183(12) Uani 1 1 d . . . . .
H3 H -0.1396 0.1318 0.2446 0.022 Uiso 1 1 calc R U . . .
C4 C -0.2172(4) 0.3502(2) 0.2348(2) 0.0185(12) Uani 1 1 d . . . . .
C5 C -0.2488(4) 0.3789(3) 0.2861(2) 0.0194(8) Uani 1 1 d . . . . .
C6 C -0.3126(4) 0.4377(2) 0.2888(2) 0.0194(8) Uani 1 1 d . . . . .
H6 H -0.3342 0.4576 0.3236 0.023 Uiso 1 1 calc R U . . .
C7 C -0.3456(4) 0.4678(2) 0.2424(2) 0.0208(12) Uani 1 1 d . . . . .
C8 C -0.3117(4) 0.4393(3) 0.1923(2) 0.0216(12) Uani 1 1 d . . . . .
H8 H -0.3327 0.4605 0.1603 0.026 Uiso 1 1 calc R U . . .
C9 C -0.2479(4) 0.3805(3) 0.1871(2) 0.0217(12) Uani 1 1 d . . . . .
C10 C -0.2153(4) 0.3481(2) 0.3392(2) 0.0193(12) Uani 1 1 d . . . . .
H10 H -0.1427 0.3229 0.3336 0.023 Uiso 1 1 calc R U . . .
C11 C -0.3032(4) 0.2976(3) 0.3540(2) 0.0234(13) Uani 1 1 d . . . . .
C12 C -0.4157(4) 0.2967(3) 0.3335(2) 0.0322(14) Uani 1 1 d . . . . .
H12 H -0.4399 0.3275 0.3081 0.039 Uiso 1 1 calc R U . . .
C13 C -0.4934(5) 0.2515(3) 0.3497(3) 0.0408(17) Uani 1 1 d . . . . .
H13 H -0.5705 0.2517 0.3355 0.049 Uiso 1 1 calc R U . . .
C14 C -0.4594(5) 0.2066(3) 0.3858(3) 0.0502(19) Uani 1 1 d . . . . .
H14 H -0.5124 0.1751 0.3964 0.060 Uiso 1 1 calc R U . . .
C15 C -0.3479(5) 0.2073(3) 0.4069(3) 0.0523(19) Uani 1 1 d . . . . .
H15 H -0.3239 0.1764 0.4323 0.063 Uiso 1 1 calc R U . . .
C16 C -0.2712(5) 0.2528(3) 0.3911(3) 0.0406(16) Uani 1 1 d . . . . .
H16 H -0.1948 0.2532 0.4062 0.049 Uiso 1 1 calc R U . . .
C17 C -0.1906(4) 0.4055(2) 0.3857(2) 0.0198(12) Uani 1 1 d . . . . .
C18 C -0.0949(4) 0.4458(3) 0.3831(2) 0.0287(14) Uani 1 1 d . . . . .
H18 H -0.0436 0.4346 0.3551 0.034 Uiso 1 1 calc R U . . .
C19 C -0.0739(5) 0.5020(3) 0.4209(2) 0.0392(16) Uani 1 1 d . . . . .
H19 H -0.0074 0.5287 0.4194 0.047 Uiso 1 1 calc R U . . .
C20 C -0.1492(5) 0.5195(3) 0.4608(3) 0.0417(17) Uani 1 1 d . . . . .
H20 H -0.1354 0.5588 0.4861 0.050 Uiso 1 1 calc R U . . .
C21 C -0.2444(5) 0.4800(3) 0.4642(2) 0.0331(14) Uani 1 1 d . . . . .
H21 H -0.2962 0.4918 0.4918 0.040 Uiso 1 1 calc R U . . .
C22 C -0.2637(4) 0.4225(3) 0.4267(2) 0.0247(13) Uani 1 1 d . . . . .
H22 H -0.3282 0.3946 0.4294 0.030 Uiso 1 1 calc R U . . .
C23 C -0.4152(4) 0.5311(3) 0.2472(2) 0.0304(14) Uani 1 1 d . . . . .
H23A H -0.4960 0.5193 0.2399 0.046 Uiso 1 1 calc R U . . .
H23B H -0.3922 0.5608 0.2204 0.046 Uiso 1 1 calc R U . . .
H23C H -0.4029 0.5546 0.2844 0.046 Uiso 1 1 calc R U . . .
C24 C -0.2162(4) 0.3497(3) 0.1303(2) 0.0231(13) Uani 1 1 d . . . . .
H24 H -0.1375 0.3313 0.1351 0.028 Uiso 1 1 calc R U . . .
C25 C -0.2098(4) 0.4055(3) 0.0918(2) 0.0274(14) Uani 1 1 d . . . . .
C26 C -0.1217(5) 0.4531(3) 0.1013(2) 0.0388(16) Uani 1 1 d . . . . .
H26 H -0.0654 0.4493 0.1303 0.047 Uiso 1 1 calc R U . . .
C27 C -0.1150(6) 0.5056(4) 0.0694(3) 0.057(2) Uani 1 1 d . . . . .
H27 H -0.0532 0.5369 0.0759 0.068 Uiso 1 1 calc R U . . .
C28 C -0.1976(7) 0.5130(4) 0.0282(3) 0.058(2) Uani 1 1 d . . . . .
H28 H -0.1934 0.5495 0.0065 0.070 Uiso 1 1 calc R U . . .
C29 C -0.2861(7) 0.4671(4) 0.0188(3) 0.058(2) Uani 1 1 d . . . . .
H29 H -0.3441 0.4724 -0.0092 0.070 Uiso 1 1 calc R U . . .
C30 C -0.2910(5) 0.4134(3) 0.0499(2) 0.0384(16) Uani 1 1 d . . . . .
H30 H -0.3513 0.3813 0.0423 0.046 Uiso 1 1 calc R U . . .
C31 C -0.2925(4) 0.2905(3) 0.1064(2) 0.0306(14) Uani 1 1 d . . . . .
C32 C -0.3956(5) 0.2773(3) 0.1268(3) 0.0500(19) Uani 1 1 d . . . . .
H32 H -0.4205 0.3053 0.1576 0.060 Uiso 1 1 calc R U . . .
C33 C -0.4639(6) 0.2228(4) 0.1024(3) 0.073(3) Uani 1 1 d . . . . .
H33 H -0.5349 0.2141 0.1167 0.088 Uiso 1 1 calc R U . . .
C34 C -0.4285(7) 0.1820(4) 0.0578(4) 0.076(3) Uani 1 1 d . . . . .
H34 H -0.4749 0.1451 0.0414 0.091 Uiso 1 1 calc R U . . .
C35 C -0.3265(7) 0.1947(4) 0.0370(3) 0.067(2) Uani 1 1 d . . . . .
H35 H -0.3024 0.1669 0.0059 0.081 Uiso 1 1 calc R U . . .
C36 C -0.2580(5) 0.2485(3) 0.0616(3) 0.0464(18) Uani 1 1 d . . . . .
H36 H -0.1867 0.2565 0.0474 0.056 Uiso 1 1 calc R U . . .
C37 C 0.0825(4) 0.1787(2) 0.2335(2) 0.0160(11) Uani 1 1 d . . . . .
C38 C 0.1279(4) 0.1511(2) 0.1847(2) 0.0152(11) Uani 1 1 d . . . . .
C39 C 0.2379(4) 0.1265(2) 0.1879(2) 0.0204(12) Uani 1 1 d . . . . .
H39 H 0.2713 0.1089 0.1551 0.024 Uiso 1 1 calc R U . . .
C40 C 0.3005(4) 0.1270(2) 0.2380(2) 0.0197(12) Uani 1 1 d . . . . .
C41 C 0.2495(4) 0.1496(2) 0.2853(2) 0.0207(12) Uani 1 1 d . . . . .
H41 H 0.2909 0.1476 0.3197 0.025 Uiso 1 1 calc R U . . .
C42 C 0.1395(4) 0.1753(2) 0.2848(2) 0.0179(12) Uani 1 1 d . . . . .
C43 C 0.0515(4) 0.1398(2) 0.13181(19) 0.0171(12) Uani 1 1 d . . . . .
H43 H 0.0029 0.1810 0.1307 0.020 Uiso 1 1 calc R U . . .
C44 C 0.1129(4) 0.1321(2) 0.0788(2) 0.0194(12) Uani 1 1 d . . . . .
C45 C 0.2021(4) 0.1755(3) 0.0713(2) 0.0240(13) Uani 1 1 d . . . . .
H45 H 0.2283 0.2080 0.1008 0.029 Uiso 1 1 calc R U . . .
C46 C 0.2530(4) 0.1725(3) 0.0225(2) 0.0301(14) Uani 1 1 d . . . . .
H46 H 0.3137 0.2028 0.0185 0.036 Uiso 1 1 calc R U . . .
C47 C 0.2169(4) 0.1259(3) -0.0211(2) 0.0330(14) Uani 1 1 d . . . . .
H47 H 0.2514 0.1244 -0.0552 0.040 Uiso 1 1 calc R U . . .
C48 C 0.1308(5) 0.0819(3) -0.0146(2) 0.0332(15) Uani 1 1 d . . . . .
H48 H 0.1065 0.0489 -0.0440 0.040 Uiso 1 1 calc R U . . .
C49 C 0.0789(4) 0.0853(3) 0.0348(2) 0.0266(13) Uani 1 1 d . . . . .
H49 H 0.0186 0.0547 0.0386 0.032 Uiso 1 1 calc R U . . .
C50 C -0.0289(4) 0.0809(3) 0.1379(2) 0.0194(12) Uani 1 1 d . . . . .
C51 C -0.1448(4) 0.0849(3) 0.1234(2) 0.0308(15) Uani 1 1 d . . . . .
H51 H -0.1738 0.1233 0.1074 0.037 Uiso 1 1 calc R U . . .
C52 C -0.2183(5) 0.0330(3) 0.1324(3) 0.0405(17) Uani 1 1 d . . . . .
H52 H -0.2972 0.0361 0.1223 0.049 Uiso 1 1 calc R U . . .
C53 C -0.1772(5) -0.0228(3) 0.1557(2) 0.0425(18) Uani 1 1 d . . . . .
H53 H -0.2282 -0.0576 0.1626 0.051 Uiso 1 1 calc R U . . .
C54 C -0.0632(5) -0.0283(3) 0.1692(2) 0.0347(15) Uani 1 1 d . . . . .
H54 H -0.0345 -0.0674 0.1843 0.042 Uiso 1 1 calc R U . . .
C55 C 0.0105(5) 0.0239(3) 0.1605(2) 0.0297(14) Uani 1 1 d . . . . .
H55 H 0.0895 0.0202 0.1703 0.036 Uiso 1 1 calc R U . . .
C56 C 0.4217(4) 0.1018(3) 0.2398(2) 0.0300(14) Uani 1 1 d . . . . .
H56A H 0.4741 0.1402 0.2399 0.045 Uiso 1 1 calc R U . . .
H56B H 0.4320 0.0693 0.2075 0.045 Uiso 1 1 calc R U . . .
H56C H 0.4375 0.0797 0.2733 0.045 Uiso 1 1 calc R U . . .
C57 C 0.0808(4) 0.1952(2) 0.3380(2) 0.0216(12) Uani 1 1 d . . . . .
H57 H 0.0128 0.2224 0.3278 0.026 Uiso 1 1 calc R U . . .
C58 C 0.0355(4) 0.1337(3) 0.3624(2) 0.0220(13) Uani 1 1 d . . . . .
C59 C 0.0416(4) 0.0681(3) 0.3373(2) 0.0326(15) Uani 1 1 d . . . . .
H59 H 0.0762 0.0597 0.3033 0.039 Uiso 1 1 calc R U . . .
C60 C -0.0022(5) 0.0145(3) 0.3613(3) 0.0466(18) Uani 1 1 d . . . . .
H60 H 0.0037 -0.0304 0.3438 0.056 Uiso 1 1 calc R U . . .
C61 C -0.0539(5) 0.0252(3) 0.4098(3) 0.0451(18) Uani 1 1 d . . . . .
H61 H -0.0836 -0.0119 0.4258 0.054 Uiso 1 1 calc R U . . .
C62 C -0.0626(5) 0.0896(4) 0.4351(3) 0.0443(17) Uani 1 1 d . . . . .
H62 H -0.0988 0.0976 0.4687 0.053 Uiso 1 1 calc R U . . .
C63 C -0.0180(4) 0.1434(3) 0.4112(2) 0.0342(15) Uani 1 1 d . . . . .
H63 H -0.0244 0.1881 0.4289 0.041 Uiso 1 1 calc R U . . .
C64 C 0.1572(4) 0.2424(3) 0.3787(2) 0.0204(12) Uani 1 1 d . . . . .
C65 C 0.2313(4) 0.2169(3) 0.4178(2) 0.0285(14) Uani 1 1 d . . . . .
H65 H 0.2345 0.1696 0.4205 0.034 Uiso 1 1 calc R U . . .
C66 C 0.2999(5) 0.2610(4) 0.4527(2) 0.0454(18) Uani 1 1 d . . . . .
H66 H 0.3510 0.2435 0.4792 0.055 Uiso 1 1 calc R U . . .
C67 C 0.2963(5) 0.3296(4) 0.4502(3) 0.053(2) Uani 1 1 d . . . . .
H67 H 0.3440 0.3592 0.4747 0.064 Uiso 1 1 calc R U . . .
C68 C 0.2231(6) 0.3552(3) 0.4118(3) 0.0496(19) Uani 1 1 d . . . . .
H68 H 0.2200 0.4026 0.4094 0.060 Uiso 1 1 calc R U . . .
C69 C 0.1535(5) 0.3110(3) 0.3764(2) 0.0333(15) Uani 1 1 d . . . . .
H69 H 0.1024 0.3287 0.3501 0.040 Uiso 1 1 calc R U . . .
C70 C 0.0994(4) 0.3359(2) 0.11733(19) 0.0187(7) Uani 1 1 d . . . . .
H70A H 0.0738 0.3778 0.1029 0.028 Uiso 1 1 calc R U . . .
H70B H 0.0468 0.2989 0.1032 0.028 Uiso 1 1 calc R U . . .
H70C H 0.1759 0.3250 0.1057 0.028 Uiso 1 1 calc R U . . .
C71 C 0.2708(4) 0.3198(2) 0.2401(2) 0.0187(7) Uani 1 1 d . . . . .
H71A H 0.3287 0.3504 0.2294 0.028 Uiso 1 1 calc R U . . .
H71B H 0.2862 0.2733 0.2246 0.028 Uiso 1 1 calc R U . . .
H71C H 0.2730 0.3220 0.2802 0.028 Uiso 1 1 calc R U . . .
C72 C 0.0501(4) 0.4479(2) 0.2460(2) 0.0187(7) Uani 1 1 d . . . . .
H72A H 0.0808 0.4551 0.2844 0.028 Uiso 1 1 calc R U . . .
H72B H -0.0332 0.4494 0.2448 0.028 Uiso 1 1 calc R U . . .
H72C H 0.0786 0.4835 0.2257 0.028 Uiso 1 1 calc R U . . .
C73 C 0.3437(4) 0.7798(2) 0.28149(19) 0.0153(11) Uani 1 1 d . . . . .
C74 C 0.5100(4) 0.7255(2) 0.26666(19) 0.0197(12) Uani 1 1 d . . . . .
H74 H 0.5888 0.7181 0.2623 0.024 Uiso 1 1 calc R U . . .
C75 C 0.4275(4) 0.6778(2) 0.2616(2) 0.0182(12) Uani 1 1 d . . . . .
H75 H 0.4366 0.6303 0.2535 0.022 Uiso 1 1 calc R U . . .
C76 C 0.5167(4) 0.8524(2) 0.2845(2) 0.0139(11) Uani 1 1 d . . . . .
C77 C 0.5611(4) 0.8808(2) 0.3364(2) 0.0188(12) Uani 1 1 d . . . . .
C78 C 0.6138(4) 0.9443(2) 0.3396(2) 0.0222(13) Uani 1 1 d . . . . .
H78 H 0.6416 0.9654 0.3745 0.027 Uiso 1 1 calc R U . . .
C79 C 0.6269(4) 0.9774(2) 0.2934(2) 0.0189(12) Uani 1 1 d . . . . .
C80 C 0.5848(4) 0.9468(2) 0.2431(2) 0.0220(12) Uani 1 1 d . . . . .
H80 H 0.5936 0.9692 0.2113 0.026 Uiso 1 1 calc R U . . .
C81 C 0.5295(4) 0.8838(2) 0.2371(2) 0.0174(12) Uani 1 1 d . . . . .
C82 C 0.5596(4) 0.8406(2) 0.3860(2) 0.0204(12) Uani 1 1 d . . . . .
H82 H 0.4800 0.8235 0.3871 0.025 Uiso 1 1 calc R U . . .
C83 C 0.6356(4) 0.7785(3) 0.3782(2) 0.0213(12) Uani 1 1 d . . . . .
C84 C 0.7350(4) 0.7792(3) 0.3499(2) 0.0277(14) Uani 1 1 d . . . . .
H84 H 0.7570 0.8190 0.3349 0.033 Uiso 1 1 calc R U . . .
C85 C 0.8015(4) 0.7214(3) 0.3439(2) 0.0344(15) Uani 1 1 d . . . . .
H85 H 0.8690 0.7219 0.3247 0.041 Uiso 1 1 calc R U . . .
C86 C 0.7702(5) 0.6633(3) 0.3655(2) 0.0363(15) Uani 1 1 d . . . . .
H86 H 0.8167 0.6242 0.3613 0.044 Uiso 1 1 calc R U . . .
C87 C 0.6736(5) 0.6617(3) 0.3926(2) 0.0362(15) Uani 1 1 d . . . . .
H87 H 0.6516 0.6214 0.4069 0.043 Uiso 1 1 calc R U . . .
C88 C 0.6071(4) 0.7192(3) 0.3992(2) 0.0269(13) Uani 1 1 d . . . . .
H88 H 0.5401 0.7180 0.4187 0.032 Uiso 1 1 calc R U . . .
C89 C 0.5907(4) 0.8803(2) 0.4420(2) 0.0242(13) Uani 1 1 d . . . . .
C90 C 0.5090(5) 0.8958(3) 0.4791(2) 0.0346(15) Uani 1 1 d . . . . .
H90 H 0.4321 0.8828 0.4691 0.042 Uiso 1 1 calc R U . . .
C91 C 0.5361(6) 0.9297(3) 0.5309(3) 0.0494(18) Uani 1 1 d . . . . .
H91 H 0.4785 0.9400 0.5558 0.059 Uiso 1 1 calc R U . . .
C92 C 0.6475(7) 0.9485(3) 0.5457(3) 0.052(2) Uani 1 1 d . . . . .
H92 H 0.6667 0.9717 0.5810 0.063 Uiso 1 1 calc R U . . .
C93 C 0.7302(6) 0.9339(3) 0.5100(3) 0.0497(19) Uani 1 1 d . . . . .
H93 H 0.8065 0.9478 0.5205 0.060 Uiso 1 1 calc R U . . .
C94 C 0.7042(5) 0.8991(3) 0.4587(2) 0.0337(15) Uani 1 1 d . . . . .
H94 H 0.7631 0.8879 0.4347 0.040 Uiso 1 1 calc R U . . .
C95 C 0.6882(4) 1.0452(3) 0.2983(2) 0.0321(14) Uani 1 1 d . . . . .
H95A H 0.6862 1.0620 0.2621 0.048 Uiso 1 1 calc R U . . .
H95B H 0.7674 1.0397 0.3118 0.048 Uiso 1 1 calc R U . . .
H95C H 0.6505 1.0776 0.3241 0.048 Uiso 1 1 calc R U . . .
C96 C 0.4942(4) 0.8485(3) 0.1799(2) 0.0247(13) Uani 1 1 d . . . . .
H96 H 0.4308 0.8168 0.1850 0.030 Uiso 1 1 calc R U . . .
C97 C 0.4462(4) 0.8964(3) 0.1399(2) 0.0247(13) Uani 1 1 d . . . . .
C98 C 0.3304(5) 0.9091(3) 0.1345(3) 0.0408(16) Uani 1 1 d . . . . .
H98 H 0.2800 0.8873 0.1558 0.049 Uiso 1 1 calc R U . . .
C99 C 0.2869(5) 0.9532(4) 0.0981(3) 0.0525(19) Uani 1 1 d . . . . .
H99 H 0.2073 0.9608 0.0946 0.063 Uiso 1 1 calc R U . . .
C100 C 0.3583(6) 0.9856(3) 0.0676(3) 0.0484(18) Uani 1 1 d . . . . .
H100 H 0.3286 1.0163 0.0432 0.058 Uiso 1 1 calc R U . . .
C101 C 0.4724(5) 0.9737(3) 0.0722(2) 0.0387(16) Uani 1 1 d . . . . .
H101 H 0.5223 0.9958 0.0509 0.046 Uiso 1 1 calc R U . . .
C102 C 0.5154(5) 0.9294(3) 0.1078(2) 0.0309(14) Uani 1 1 d . . . . .
H102 H 0.5950 0.9214 0.1103 0.037 Uiso 1 1 calc R U . . .
C103 C 0.5893(4) 0.8045(3) 0.1560(2) 0.0269(13) Uani 1 1 d . . . . .
C104 C 0.6971(4) 0.7999(3) 0.1823(3) 0.0349(15) Uani 1 1 d . . . . .
H104 H 0.7145 0.8265 0.2165 0.042 Uiso 1 1 calc R U . . .
C105 C 0.7800(5) 0.7574(3) 0.1597(3) 0.0539(19) Uani 1 1 d . . . . .
H105 H 0.8528 0.7549 0.1784 0.065 Uiso 1 1 calc R U . . .
C106 C 0.7558(7) 0.7192(3) 0.1103(3) 0.061(2) Uani 1 1 d . . . . .
H106 H 0.8117 0.6900 0.0948 0.073 Uiso 1 1 calc R U . . .
C107 C 0.6505(7) 0.7234(3) 0.0834(3) 0.056(2) Uani 1 1 d . . . . .
H107 H 0.6342 0.6965 0.0493 0.067 Uiso 1 1 calc R U . . .
C108 C 0.5677(5) 0.7661(3) 0.1050(3) 0.0401(16) Uani 1 1 d . . . . .
H108 H 0.4962 0.7693 0.0852 0.048 Uiso 1 1 calc R U . . .
C109 C 0.2158(4) 0.6793(2) 0.2628(2) 0.0145(11) Uani 1 1 d . . . . .
C110 C 0.1676(4) 0.6657(2) 0.2093(2) 0.0168(12) Uani 1 1 d . . . . .
C111 C 0.0569(4) 0.6391(2) 0.2027(2) 0.0217(13) Uani 1 1 d . . . . .
H111 H 0.0206 0.6318 0.1668 0.026 Uiso 1 1 calc R U . . .
C112 C -0.0010(4) 0.6232(2) 0.2466(2) 0.0204(12) Uani 1 1 d . . . . .
C113 C 0.0536(4) 0.6332(2) 0.2990(2) 0.0187(12) Uani 1 1 d . . . . .
H113 H 0.0158 0.6198 0.3292 0.022 Uiso 1 1 calc R U . . .
C114 C 0.1620(4) 0.6622(2) 0.3086(2) 0.0144(11) Uani 1 1 d . . . . .
C115 C 0.2350(4) 0.6739(3) 0.1592(2) 0.0206(12) Uani 1 1 d . . . . .
H115 H 0.2920 0.7109 0.1705 0.025 Uiso 1 1 calc R U . . .
C116 C 0.1581(4) 0.6969(3) 0.1124(2) 0.0259(13) Uani 1 1 d . . . . .
C117 C 0.1196(5) 0.7621(3) 0.1176(3) 0.0432(17) Uani 1 1 d . . . . .
H117 H 0.1434 0.7917 0.1494 0.052 Uiso 1 1 calc R U . . .
C118 C 0.0467(6) 0.7860(4) 0.0774(3) 0.057(2) Uani 1 1 d . . . . .
H118 H 0.0222 0.8318 0.0814 0.068 Uiso 1 1 calc R U . . .
C119 C 0.0100(5) 0.7432(4) 0.0319(3) 0.0482(18) Uani 1 1 d . . . . .
H119 H -0.0404 0.7590 0.0044 0.058 Uiso 1 1 calc R U . . .
C120 C 0.0465(5) 0.6777(4) 0.0264(2) 0.0414(17) Uani 1 1 d . . . . .
H120 H 0.0204 0.6479 -0.0048 0.050 Uiso 1 1 calc R U . . .
C121 C 0.1220(4) 0.6544(3) 0.0664(2) 0.0325(14) Uani 1 1 d . . . . .
H121 H 0.1485 0.6091 0.0618 0.039 Uiso 1 1 calc R U . . .
C122 C 0.3020(4) 0.6096(3) 0.1426(2) 0.0234(13) Uani 1 1 d . . . . .
C123 C 0.4086(4) 0.6145(3) 0.1229(2) 0.0356(15) Uani 1 1 d . . . . .
H123 H 0.4394 0.6581 0.1197 0.043 Uiso 1 1 calc R U . . .
C124 C 0.4715(5) 0.5574(4) 0.1076(2) 0.0441(18) Uani 1 1 d . . . . .
H124 H 0.5447 0.5621 0.0941 0.053 Uiso 1 1 calc R U . . .
C125 C 0.4283(5) 0.4943(3) 0.1118(2) 0.0434(17) Uani 1 1 d . . . . .
H125 H 0.4708 0.4551 0.1008 0.052 Uiso 1 1 calc R U . . .
C126 C 0.3235(5) 0.4881(3) 0.1319(2) 0.0429(17) Uani 1 1 d . . . . .
H126 H 0.2937 0.4444 0.1352 0.051 Uiso 1 1 calc R U . . .
C127 C 0.2609(5) 0.5449(3) 0.1472(2) 0.0332(14) Uani 1 1 d . . . . .
H127 H 0.1884 0.5397 0.1612 0.040 Uiso 1 1 calc R U . . .
C128 C -0.1213(4) 0.5948(3) 0.2373(2) 0.0284(14) Uani 1 1 d . . . . .
H12A H -0.1757 0.6321 0.2385 0.043 Uiso 1 1 calc R U . . .
H12B H -0.1358 0.5659 0.2661 0.043 Uiso 1 1 calc R U . . .
H12C H -0.1299 0.5680 0.2012 0.043 Uiso 1 1 calc R U . . .
C129 C 0.2223(4) 0.6681(3) 0.3655(2) 0.0213(12) Uani 1 1 d . . . . .
H129 H 0.2729 0.7090 0.3683 0.026 Uiso 1 1 calc R U . . .
C130 C 0.3000(4) 0.6078(3) 0.3737(2) 0.0240(13) Uani 1 1 d . . . . .
C131 C 0.2921(4) 0.5484(3) 0.3385(2) 0.0328(14) Uani 1 1 d . . . . .
H131 H 0.2390 0.5450 0.3074 0.039 Uiso 1 1 calc R U . . .
C132 C 0.3611(5) 0.4936(3) 0.3480(3) 0.0519(19) Uani 1 1 d . . . . .
H132 H 0.3556 0.4535 0.3231 0.062 Uiso 1 1 calc R U . . .
C133 C 0.4373(5) 0.4971(4) 0.3931(4) 0.065(2) Uani 1 1 d . . . . .
H133 H 0.4831 0.4592 0.4000 0.078 Uiso 1 1 calc R U . . .
C134 C 0.4461(5) 0.5558(4) 0.4279(3) 0.058(2) Uani 1 1 d . . . . .
H134 H 0.4997 0.5589 0.4588 0.070 Uiso 1 1 calc R U . . .
C135 C 0.3780(4) 0.6111(3) 0.4188(3) 0.0414(17) Uani 1 1 d . . . . .
H135 H 0.3849 0.6514 0.4436 0.050 Uiso 1 1 calc R U . . .
C136 C 0.1387(4) 0.6815(3) 0.4106(2) 0.0210(12) Uani 1 1 d . . . . .
C137 C 0.1270(4) 0.6393(3) 0.4508(2) 0.0278(14) Uani 1 1 d . . . . .
H137 H 0.1727 0.5999 0.4512 0.033 Uiso 1 1 calc R U . . .
C138 C 0.0498(5) 0.6530(3) 0.4907(2) 0.0336(15) Uani 1 1 d . . . . .
H138 H 0.0440 0.6236 0.5184 0.040 Uiso 1 1 calc R U . . .
C139 C -0.0181(5) 0.7085(3) 0.4903(2) 0.0355(16) Uani 1 1 d . . . . .
H139 H -0.0724 0.7172 0.5172 0.043 Uiso 1 1 calc R U . . .
C140 C -0.0071(5) 0.7518(3) 0.4507(2) 0.0367(15) Uani 1 1 d . . . . .
H140 H -0.0533 0.7910 0.4506 0.044 Uiso 1 1 calc R U . . .
C141 C 0.0700(4) 0.7387(3) 0.4113(2) 0.0293(14) Uani 1 1 d . . . . .
H141 H 0.0767 0.7690 0.3842 0.035 Uiso 1 1 calc R U . . .
C142 C 0.2680(4) 0.9572(2) 0.2765(2) 0.0240(8) Uani 1 1 d . . . . .
H14A H 0.2341 0.9958 0.2979 0.036 Uiso 1 1 calc R U . . .
H14B H 0.2434 0.9571 0.2376 0.036 Uiso 1 1 calc R U . . .
H14C H 0.3512 0.9609 0.2811 0.036 Uiso 1 1 calc R U . . .
C143 C 0.0429(4) 0.8278(2) 0.2726(2) 0.0240(8) Uani 1 1 d . . . . .
H14D H -0.0151 0.8545 0.2920 0.036 Uiso 1 1 calc R U . . .
H14E H 0.0338 0.7799 0.2780 0.036 Uiso 1 1 calc R U . . .
H14F H 0.0339 0.8329 0.2333 0.036 Uiso 1 1 calc R U . . .
C144 C 0.2361(4) 0.8754(2) 0.3959(2) 0.0240(8) Uani 1 1 d . . . . .
H14G H 0.2935 0.9105 0.4079 0.036 Uiso 1 1 calc R U . . .
H14H H 0.2611 0.8324 0.4085 0.036 Uiso 1 1 calc R U . . .
H14I H 0.1636 0.8885 0.4113 0.036 Uiso 1 1 calc R U . . .
N1 N -0.1560(3) 0.28673(19) 0.23162(15) 0.0148(9) Uani 1 1 d . . . . .
N2 N -0.0279(3) 0.21024(19) 0.23109(16) 0.0140(9) Uani 1 1 d . . . . .
N3 N 0.4588(3) 0.78683(19) 0.27931(16) 0.0148(9) Uani 1 1 d . . . . .
N4 N 0.3265(3) 0.71199(18) 0.27057(15) 0.0130(9) Uani 1 1 d . . . . .
In1 In 0.10340(3) 0.34974(2) 0.20886(2) 0.02584(12) Uani 1 1 d . . . . .
In2 In 0.21352(3) 0.86360(2) 0.30554(2) 0.02758(12) Uani 1 1 d . . . . .
 
loop_
 _atom_site_aniso_label
 _atom_site_aniso_U_11
 _atom_site_aniso_U_22
 _atom_site_aniso_U_33
 _atom_site_aniso_U_23
 _atom_site_aniso_U_13
 _atom_site_aniso_U_12
C1 0.020(3) 0.012(3) 0.012(3) 0.001(2) 0.001(2) 0.006(2)
C2 0.018(3) 0.018(3) 0.026(3) -0.004(2) 0.009(2) 0.001(2)
C3 0.020(3) 0.011(3) 0.023(3) -0.003(2) 0.011(2) -0.001(2)
C4 0.015(3) 0.012(3) 0.028(3) -0.001(2) 0.000(2) -0.001(2)
C5 0.0184(19) 0.022(2) 0.017(2) -0.0021(17) 0.0049(16) 0.0033(15)
C6 0.0184(19) 0.022(2) 0.017(2) -0.0021(17) 0.0049(16) 0.0033(15)
C7 0.019(3) 0.017(3) 0.026(3) 0.000(2) 0.000(2) 0.008(2)
C8 0.021(3) 0.025(3) 0.019(3) 0.004(2) 0.000(2) 0.006(2)
C9 0.020(3) 0.024(3) 0.021(3) 0.002(3) -0.001(2) 0.002(2)
C10 0.018(3) 0.020(3) 0.021(3) 0.001(2) 0.004(2) 0.009(2)
C11 0.026(3) 0.020(3) 0.024(3) -0.001(3) 0.007(2) 0.001(2)
C12 0.029(3) 0.035(4) 0.033(4) 0.011(3) -0.001(3) 0.003(3)
C13 0.031(3) 0.036(4) 0.056(5) 0.008(4) 0.007(3) -0.004(3)
C14 0.047(4) 0.032(4) 0.074(5) 0.014(4) 0.015(4) -0.006(3)
C15 0.054(4) 0.038(4) 0.070(5) 0.033(4) 0.003(4) 0.001(3)
C16 0.033(3) 0.038(4) 0.055(4) 0.021(3) 0.000(3) 0.003(3)
C17 0.023(3) 0.019(3) 0.017(3) 0.003(2) 0.001(2) 0.008(2)
C18 0.036(3) 0.032(4) 0.019(3) 0.002(3) 0.005(3) -0.001(3)
C19 0.044(4) 0.039(4) 0.035(4) 0.009(3) -0.002(3) -0.012(3)
C20 0.060(4) 0.030(4) 0.033(4) -0.004(3) -0.006(3) 0.004(3)
C21 0.046(4) 0.033(4) 0.020(3) 0.000(3) 0.008(3) 0.015(3)
C22 0.026(3) 0.026(3) 0.022(3) 0.005(3) 0.003(2) 0.006(2)
C23 0.037(3) 0.027(3) 0.026(3) 0.000(3) 0.004(3) 0.015(3)
C24 0.023(3) 0.027(3) 0.018(3) -0.002(3) 0.004(2) 0.009(2)
C25 0.035(3) 0.029(3) 0.018(3) -0.001(3) 0.007(3) 0.019(3)
C26 0.047(4) 0.041(4) 0.030(4) 0.007(3) 0.004(3) 0.006(3)
C27 0.088(6) 0.042(5) 0.042(5) 0.008(4) 0.011(4) 0.001(4)
C28 0.115(7) 0.038(5) 0.027(4) 0.014(4) 0.023(4) 0.024(4)
C29 0.096(6) 0.056(5) 0.022(4) 0.012(4) -0.009(4) 0.031(4)
C30 0.058(4) 0.039(4) 0.016(3) -0.002(3) -0.004(3) 0.021(3)
C31 0.032(3) 0.031(4) 0.027(3) 0.000(3) -0.001(3) 0.007(3)
C32 0.041(4) 0.059(5) 0.046(4) -0.013(4) -0.003(3) -0.010(3)
C33 0.045(4) 0.080(6) 0.089(7) -0.011(5) -0.007(4) -0.016(4)
C34 0.073(6) 0.056(6) 0.089(7) -0.015(5) -0.029(5) -0.006(4)
C35 0.094(6) 0.045(5) 0.055(5) -0.019(4) -0.017(5) 0.015(4)
C36 0.059(4) 0.032(4) 0.046(4) -0.004(3) -0.003(3) 0.006(3)
C37 0.017(3) 0.013(3) 0.018(3) 0.002(2) 0.001(2) 0.002(2)
C38 0.015(3) 0.012(3) 0.019(3) 0.002(2) 0.003(2) 0.003(2)
C39 0.023(3) 0.018(3) 0.019(3) -0.004(2) 0.009(2) 0.003(2)
C40 0.020(3) 0.012(3) 0.028(3) -0.001(2) 0.006(2) 0.004(2)
C41 0.022(3) 0.016(3) 0.023(3) 0.004(2) -0.007(2) 0.003(2)
C42 0.024(3) 0.015(3) 0.016(3) 0.002(2) 0.004(2) 0.000(2)
C43 0.021(3) 0.012(3) 0.018(3) -0.001(2) 0.001(2) 0.003(2)
C44 0.019(3) 0.018(3) 0.023(3) 0.006(2) 0.004(2) 0.006(2)
C45 0.031(3) 0.021(3) 0.019(3) -0.001(2) 0.002(2) -0.001(2)
C46 0.028(3) 0.034(4) 0.031(4) 0.011(3) 0.008(3) 0.000(3)
C47 0.038(3) 0.042(4) 0.022(3) 0.008(3) 0.014(3) 0.006(3)
C48 0.046(4) 0.034(4) 0.017(3) -0.010(3) 0.009(3) 0.002(3)
C49 0.031(3) 0.023(3) 0.026(3) 0.003(3) 0.002(3) -0.002(2)
C50 0.018(3) 0.025(3) 0.013(3) -0.008(2) 0.004(2) -0.001(2)
C51 0.022(3) 0.033(4) 0.035(4) -0.007(3) 0.000(3) 0.001(3)
C52 0.026(3) 0.050(5) 0.043(4) -0.013(4) 0.010(3) -0.008(3)
C53 0.048(4) 0.044(5) 0.034(4) -0.007(3) 0.012(3) -0.023(3)
C54 0.050(4) 0.025(4) 0.030(4) 0.009(3) -0.002(3) -0.008(3)
C55 0.030(3) 0.029(4) 0.031(4) 0.005(3) -0.001(3) -0.005(3)
C56 0.020(3) 0.036(4) 0.034(4) 0.004(3) 0.001(3) 0.009(2)
C57 0.023(3) 0.018(3) 0.024(3) 0.007(2) -0.001(2) 0.006(2)
C58 0.019(3) 0.024(3) 0.024(3) 0.004(3) 0.003(2) 0.005(2)
C59 0.035(3) 0.021(3) 0.044(4) 0.004(3) 0.018(3) 0.008(3)
C60 0.040(4) 0.025(4) 0.077(5) 0.006(4) 0.017(4) 0.002(3)
C61 0.031(4) 0.047(5) 0.063(5) 0.028(4) 0.013(3) -0.006(3)
C62 0.031(3) 0.064(5) 0.041(4) 0.009(4) 0.016(3) -0.008(3)
C63 0.037(3) 0.033(4) 0.032(4) -0.002(3) 0.007(3) -0.003(3)
C64 0.028(3) 0.020(3) 0.013(3) 0.001(2) 0.006(2) 0.001(2)
C65 0.030(3) 0.031(4) 0.023(3) -0.002(3) 0.001(3) 0.003(3)
C66 0.032(3) 0.073(5) 0.028(4) -0.008(4) 0.000(3) -0.003(3)
C67 0.055(4) 0.063(5) 0.036(4) -0.027(4) 0.010(3) -0.027(4)
C68 0.077(5) 0.027(4) 0.045(4) -0.005(3) 0.019(4) -0.019(3)
C69 0.053(4) 0.024(3) 0.023(3) 0.002(3) 0.005(3) 0.001(3)
C70 0.0219(15) 0.0161(17) 0.0187(17) 0.0012(13) 0.0062(13) 0.0014(12)
C71 0.0219(15) 0.0161(17) 0.0187(17) 0.0012(13) 0.0062(13) 0.0014(12)
C72 0.0219(15) 0.0161(17) 0.0187(17) 0.0012(13) 0.0062(13) 0.0014(12)
C73 0.019(3) 0.019(3) 0.009(3) 0.003(2) 0.002(2) 0.002(2)
C74 0.020(3) 0.020(3) 0.018(3) -0.004(2) 0.007(2) 0.003(2)
C75 0.022(3) 0.013(3) 0.019(3) -0.003(2) 0.004(2) 0.004(2)
C76 0.014(2) 0.010(3) 0.017(3) -0.002(2) 0.006(2) 0.004(2)
C77 0.018(3) 0.016(3) 0.023(3) 0.003(2) 0.004(2) 0.003(2)
C78 0.022(3) 0.016(3) 0.026(3) -0.005(3) -0.002(2) 0.003(2)
C79 0.015(3) 0.016(3) 0.026(3) 0.002(2) 0.001(2) 0.002(2)
C80 0.019(3) 0.020(3) 0.029(3) 0.007(3) 0.005(2) 0.002(2)
C81 0.012(2) 0.019(3) 0.021(3) -0.002(2) 0.008(2) 0.004(2)
C82 0.020(3) 0.018(3) 0.024(3) 0.003(2) 0.005(2) -0.002(2)
C83 0.022(3) 0.021(3) 0.020(3) 0.001(2) -0.003(2) -0.003(2)
C84 0.028(3) 0.026(3) 0.031(3) 0.008(3) -0.002(3) -0.004(3)
C85 0.024(3) 0.038(4) 0.041(4) 0.001(3) 0.005(3) 0.005(3)
C86 0.038(4) 0.028(4) 0.044(4) 0.006(3) 0.001(3) 0.014(3)
C87 0.051(4) 0.022(4) 0.036(4) 0.004(3) 0.007(3) -0.004(3)
C88 0.032(3) 0.028(3) 0.022(3) 0.003(3) 0.010(2) -0.002(3)
C89 0.040(3) 0.012(3) 0.022(3) 0.004(2) 0.003(3) 0.003(2)
C90 0.057(4) 0.025(4) 0.021(3) 0.003(3) 0.002(3) 0.009(3)
C91 0.086(5) 0.028(4) 0.034(4) -0.003(3) 0.008(4) 0.013(4)
C92 0.108(6) 0.019(4) 0.026(4) -0.003(3) -0.017(4) -0.002(4)
C93 0.074(5) 0.034(4) 0.039(4) 0.008(3) -0.023(4) -0.016(3)
C94 0.038(3) 0.030(4) 0.033(4) 0.006(3) -0.003(3) -0.004(3)
C95 0.033(3) 0.025(3) 0.039(4) 0.008(3) -0.002(3) -0.008(3)
C96 0.023(3) 0.028(3) 0.024(3) 0.006(3) 0.006(2) -0.007(2)
C97 0.032(3) 0.026(3) 0.016(3) -0.001(3) 0.001(2) -0.003(2)
C98 0.031(3) 0.054(5) 0.040(4) 0.007(3) 0.011(3) 0.004(3)
C99 0.034(4) 0.072(5) 0.052(5) 0.011(4) 0.002(3) 0.018(4)
C100 0.064(5) 0.046(5) 0.036(4) 0.012(3) -0.005(4) 0.019(4)
C101 0.049(4) 0.041(4) 0.028(4) 0.014(3) 0.004(3) 0.001(3)
C102 0.031(3) 0.034(4) 0.030(4) 0.013(3) 0.000(3) -0.004(3)
C103 0.034(3) 0.018(3) 0.031(3) 0.006(3) 0.013(3) -0.003(2)
C104 0.032(3) 0.030(4) 0.045(4) 0.003(3) 0.018(3) 0.006(3)
C105 0.045(4) 0.044(5) 0.077(6) 0.014(4) 0.021(4) 0.012(3)
C106 0.072(5) 0.040(5) 0.077(6) 0.009(4) 0.048(5) 0.013(4)
C107 0.095(6) 0.033(4) 0.041(5) -0.004(3) 0.033(4) -0.004(4)
C108 0.061(4) 0.023(4) 0.038(4) 0.004(3) 0.016(3) 0.000(3)
C109 0.013(2) 0.014(3) 0.015(3) -0.003(2) 0.002(2) 0.002(2)
C110 0.022(3) 0.012(3) 0.017(3) 0.001(2) 0.007(2) 0.003(2)
C111 0.025(3) 0.020(3) 0.019(3) -0.003(2) -0.001(2) -0.001(2)
C112 0.018(3) 0.017(3) 0.026(3) -0.003(2) 0.003(2) 0.001(2)
C113 0.019(3) 0.015(3) 0.022(3) -0.003(2) 0.011(2) 0.001(2)
C114 0.016(2) 0.011(3) 0.016(3) -0.002(2) 0.004(2) 0.005(2)
C115 0.024(3) 0.020(3) 0.018(3) 0.001(2) 0.006(2) -0.005(2)
C116 0.030(3) 0.029(4) 0.019(3) 0.005(3) 0.002(2) -0.004(3)
C117 0.064(4) 0.031(4) 0.035(4) 0.008(3) -0.004(3) 0.004(3)
C118 0.073(5) 0.041(5) 0.059(5) 0.016(4) 0.003(4) 0.021(4)
C119 0.040(4) 0.073(6) 0.035(4) 0.017(4) 0.005(3) 0.022(4)
C120 0.040(4) 0.065(5) 0.019(3) 0.003(3) 0.002(3) 0.007(3)
C121 0.037(3) 0.035(4) 0.026(3) 0.005(3) 0.004(3) 0.010(3)
C122 0.022(3) 0.033(4) 0.015(3) 0.000(3) 0.003(2) 0.001(2)
C123 0.029(3) 0.050(4) 0.027(4) -0.004(3) 0.011(3) -0.005(3)
C124 0.023(3) 0.073(5) 0.035(4) -0.008(4) 0.011(3) 0.005(3)
C125 0.039(4) 0.056(5) 0.032(4) -0.006(3) -0.005(3) 0.025(3)
C126 0.051(4) 0.036(4) 0.042(4) 0.003(3) 0.008(3) 0.008(3)
C127 0.035(3) 0.029(4) 0.038(4) 0.007(3) 0.013(3) 0.004(3)
C128 0.020(3) 0.029(3) 0.035(4) -0.005(3) 0.004(2) -0.005(2)
C129 0.022(3) 0.023(3) 0.020(3) 0.005(2) 0.001(2) -0.005(2)
C130 0.014(3) 0.030(3) 0.031(3) 0.012(3) 0.008(2) -0.002(2)
C131 0.030(3) 0.028(4) 0.044(4) 0.015(3) 0.011(3) 0.008(3)
C132 0.054(4) 0.038(4) 0.069(5) 0.020(4) 0.023(4) 0.018(3)
C133 0.035(4) 0.062(6) 0.108(7) 0.048(5) 0.020(4) 0.019(4)
C134 0.023(4) 0.082(6) 0.080(6) 0.057(5) -0.003(3) 0.003(4)
C135 0.027(3) 0.055(5) 0.046(4) 0.023(3) 0.002(3) -0.007(3)
C136 0.020(3) 0.027(3) 0.015(3) 0.000(2) -0.002(2) -0.006(2)
C137 0.033(3) 0.032(4) 0.020(3) 0.006(3) 0.004(3) -0.004(3)
C138 0.039(4) 0.043(4) 0.019(3) 0.006(3) 0.002(3) -0.009(3)
C139 0.040(4) 0.048(4) 0.018(3) -0.008(3) 0.015(3) -0.006(3)
C140 0.040(3) 0.035(4) 0.034(4) -0.004(3) 0.009(3) 0.011(3)
C141 0.039(3) 0.026(3) 0.024(3) 0.007(3) 0.005(3) 0.004(3)
C142 0.0245(16) 0.0151(17) 0.033(2) -0.0012(15) 0.0100(14) 0.0070(13)
C143 0.0245(16) 0.0151(17) 0.033(2) -0.0012(15) 0.0100(14) 0.0070(13)
C144 0.0245(16) 0.0151(17) 0.033(2) -0.0012(15) 0.0100(14) 0.0070(13)
N1 0.017(2) 0.013(2) 0.014(2) -0.0012(18) 0.0045(17) 0.0044(17)
N2 0.013(2) 0.012(2) 0.017(2) -0.0023(18) 0.0035(17) 0.0052(16)
N3 0.015(2) 0.015(2) 0.015(2) 0.0026(18) 0.0030(17) 0.0013(17)
N4 0.014(2) 0.009(2) 0.017(2) 0.0003(18) 0.0055(17) 0.0026(16)
In1 0.0227(2) 0.0191(2) 0.0359(3) 0.0035(2) 0.00234(18) -0.00140(17)
In2 0.0233(2) 0.0157(2) 0.0446(3) 0.0022(2) 0.01053(19) 0.00604(17)
 
_geom_special_details
;
 All esds (except the esd in the dihedral angle between two l.s. planes)
 are estimated using the full covariance matrix.  The cell esds are taken
 into account individually in the estimation of esds in distances, angles
 and torsion angles; correlations between esds in cell parameters are only
 used when they are defined by crystal symmetry.  An approximate (isotropic)
 treatment of cell esds is used for estimating esds involving l.s. planes.
;
 
loop_
 _geom_bond_atom_site_label_1
 _geom_bond_atom_site_label_2
 _geom_bond_distance
 _geom_bond_site_symmetry_2
 _geom_bond_publ_flag
C1 N2 1.355(6) . ?
C1 N1 1.368(5) . ?
C1 In1 2.330(5) . ?
C2 C3 1.335(6) . ?
C2 N1 1.397(6) . ?
C2 H2 0.9500 . ?
C3 N2 1.391(5) . ?
C3 H3 0.9500 . ?
C4 C5 1.397(7) . ?
C4 C9 1.399(7) . ?
C4 N1 1.450(6) . ?
C5 C6 1.386(7) . ?
C5 C10 1.528(7) . ?
C6 C7 1.376(7) . ?
C6 H6 0.9500 . ?
C7 C8 1.380(7) . ?
C7 C23 1.500(7) . ?
C8 C9 1.388(7) . ?
C8 H8 0.9500 . ?
C9 C24 1.527(7) . ?
C10 C11 1.528(7) . ?
C10 C17 1.534(6) . ?
C10 H10 1.0000 . ?
C11 C16 1.378(8) . ?
C11 C12 1.385(7) . ?
C12 C13 1.387(7) . ?
C12 H12 0.9500 . ?
C13 C14 1.368(8) . ?
C13 H13 0.9500 . ?
C14 C15 1.380(8) . ?
C14 H14 0.9500 . ?
C15 C16 1.379(8) . ?
C15 H15 0.9500 . ?
C16 H16 0.9500 . ?
C17 C22 1.381(7) . ?
C17 C18 1.390(7) . ?
C18 C19 1.383(7) . ?
C18 H18 0.9500 . ?
C19 C20 1.380(8) . ?
C19 H19 0.9500 . ?
C20 C21 1.380(8) . ?
C20 H20 0.9500 . ?
C21 C22 1.395(7) . ?
C21 H21 0.9500 . ?
C22 H22 0.9500 . ?
C23 H23A 0.9800 . ?
C23 H23B 0.9800 . ?
C23 H23C 0.9800 . ?
C24 C31 1.522(7) . ?
C24 C25 1.539(7) . ?
C24 H24 1.0000 . ?
C25 C30 1.379(7) . ?
C25 C26 1.394(7) . ?
C26 C27 1.375(8) . ?
C26 H26 0.9500 . ?
C27 C28 1.375(9) . ?
C27 H27 0.9500 . ?
C28 C29 1.375(9) . ?
C28 H28 0.9500 . ?
C29 C30 1.381(9) . ?
C29 H29 0.9500 . ?
C30 H30 0.9500 . ?
C31 C32 1.378(8) . ?
C31 C36 1.387(7) . ?
C32 C33 1.405(8) . ?
C32 H32 0.9500 . ?
C33 C34 1.375(10) . ?
C33 H33 0.9500 . ?
C34 C35 1.368(10) . ?
C34 H34 0.9500 . ?
C35 C36 1.397(8) . ?
C35 H35 0.9500 . ?
C36 H36 0.9500 . ?
C37 C42 1.396(6) . ?
C37 C38 1.398(6) . ?
C37 N2 1.444(6) . ?
C38 C39 1.385(6) . ?
C38 C43 1.525(6) . ?
C39 C40 1.390(7) . ?
C39 H39 0.9500 . ?
C40 C41 1.373(7) . ?
C40 C56 1.512(6) . ?
C41 C42 1.393(6) . ?
C41 H41 0.9500 . ?
C42 C57 1.531(7) . ?
C43 C44 1.522(7) . ?
C43 C50 1.531(6) . ?
C43 H43 1.0000 . ?
C44 C49 1.382(6) . ?
C44 C45 1.392(6) . ?
C45 C46 1.370(7) . ?
C45 H45 0.9500 . ?
C46 C47 1.379(7) . ?
C46 H46 0.9500 . ?
C47 C48 1.366(7) . ?
C47 H47 0.9500 . ?
C48 C49 1.387(7) . ?
C48 H48 0.9500 . ?
C49 H49 0.9500 . ?
C50 C55 1.381(7) . ?
C50 C51 1.392(6) . ?
C51 C52 1.389(8) . ?
C51 H51 0.9500 . ?
C52 C53 1.377(8) . ?
C52 H52 0.9500 . ?
C53 C54 1.369(8) . ?
C53 H53 0.9500 . ?
C54 C55 1.394(7) . ?
C54 H54 0.9500 . ?
C55 H55 0.9500 . ?
C56 H56A 0.9800 . ?
C56 H56B 0.9800 . ?
C56 H56C 0.9800 . ?
C57 C58 1.528(7) . ?
C57 C64 1.536(6) . ?
C57 H57 1.0000 . ?
C58 C59 1.381(7) . ?
C58 C63 1.384(7) . ?
C59 C60 1.388(8) . ?
C59 H59 0.9500 . ?
C60 C61 1.365(8) . ?
C60 H60 0.9500 . ?
C61 C62 1.366(8) . ?
C61 H61 0.9500 . ?
C62 C63 1.392(8) . ?
C62 H62 0.9500 . ?
C63 H63 0.9500 . ?
C64 C69 1.371(7) . ?
C64 C65 1.391(7) . ?
C65 C66 1.377(7) . ?
C65 H65 0.9500 . ?
C66 C67 1.371(9) . ?
C66 H66 0.9500 . ?
C67 C68 1.374(9) . ?
C67 H67 0.9500 . ?
C68 C69 1.390(7) . ?
C68 H68 0.9500 . ?
C69 H69 0.9500 . ?
C70 In1 2.228(5) . ?
C70 H70A 0.9800 . ?
C70 H70B 0.9800 . ?
C70 H70C 0.9800 . ?
C71 In1 2.176(4) . ?
C71 H71A 0.9800 . ?
C71 H71B 0.9800 . ?
C71 H71C 0.9800 . ?
C72 In1 2.172(4) . ?
C72 H72A 0.9800 . ?
C72 H72B 0.9800 . ?
C72 H72C 0.9800 . ?
C73 N4 1.357(6) . ?
C73 N3 1.367(5) . ?
C73 In2 2.319(5) . ?
C74 C75 1.347(6) . ?
C74 N3 1.373(6) . ?
C74 H74 0.9500 . ?
C75 N4 1.388(6) . ?
C75 H75 0.9500 . ?
C76 C81 1.395(7) . ?
C76 C77 1.402(6) . ?
C76 N3 1.460(6) . ?
C77 C78 1.396(6) . ?
C77 C82 1.528(7) . ?
C78 C79 1.387(7) . ?
C78 H78 0.9500 . ?
C79 C80 1.378(6) . ?
C79 C95 1.516(6) . ?
C80 C81 1.398(6) . ?
C80 H80 0.9500 . ?
C81 C96 1.529(6) . ?
C82 C83 1.527(7) . ?
C82 C89 1.529(7) . ?
C82 H82 1.0000 . ?
C83 C88 1.385(7) . ?
C83 C84 1.399(7) . ?
C84 C85 1.389(7) . ?
C84 H84 0.9500 . ?
C85 C86 1.381(8) . ?
C85 H85 0.9500 . ?
C86 C87 1.357(8) . ?
C86 H86 0.9500 . ?
C87 C88 1.387(7) . ?
C87 H87 0.9500 . ?
C88 H88 0.9500 . ?
C89 C90 1.379(7) . ?
C89 C94 1.411(7) . ?
C90 C91 1.388(7) . ?
C90 H90 0.9500 . ?
C91 C92 1.378(9) . ?
C91 H91 0.9500 . ?
C92 C93 1.360(9) . ?
C92 H92 0.9500 . ?
C93 C94 1.383(8) . ?
C93 H93 0.9500 . ?
C94 H94 0.9500 . ?
C95 H95A 0.9800 . ?
C95 H95B 0.9800 . ?
C95 H95C 0.9800 . ?
C96 C97 1.523(7) . ?
C96 C103 1.529(7) . ?
C96 H96 1.0000 . ?
C97 C102 1.382(7) . ?
C97 C98 1.388(7) . ?
C98 C99 1.391(8) . ?
C98 H98 0.9500 . ?
C99 C100 1.367(9) . ?
C99 H99 0.9500 . ?
C100 C101 1.365(8) . ?
C100 H100 0.9500 . ?
C101 C102 1.378(8) . ?
C101 H101 0.9500 . ?
C102 H102 0.9500 . ?
C103 C104 1.394(7) . ?
C103 C108 1.400(7) . ?
C104 C105 1.394(8) . ?
C104 H104 0.9500 . ?
C105 C106 1.369(9) . ?
C105 H105 0.9500 . ?
C106 C107 1.373(9) . ?
C106 H106 0.9500 . ?
C107 C108 1.386(8) . ?
C107 H107 0.9500 . ?
C108 H108 0.9500 . ?
C109 C110 1.396(6) . ?
C109 C114 1.396(6) . ?
C109 N4 1.447(5) . ?
C110 C111 1.398(6) . ?
C110 C115 1.527(7) . ?
C111 C112 1.376(7) . ?
C111 H111 0.9500 . ?
C112 C113 1.392(7) . ?
C112 C128 1.518(6) . ?
C113 C114 1.395(6) . ?
C113 H113 0.9500 . ?
C114 C129 1.518(6) . ?
C115 C116 1.524(7) . ?
C115 C122 1.532(7) . ?
C115 H115 1.0000 . ?
C116 C117 1.369(7) . ?
C116 C121 1.377(7) . ?
C117 C118 1.388(8) . ?
C117 H117 0.9500 . ?
C118 C119 1.373(8) . ?
C118 H118 0.9500 . ?
C119 C120 1.364(8) . ?
C119 H119 0.9500 . ?
C120 C121 1.397(7) . ?
C120 H120 0.9500 . ?
C121 H121 0.9500 . ?
C122 C123 1.381(7) . ?
C122 C127 1.393(7) . ?
C123 C124 1.387(8) . ?
C123 H123 0.9500 . ?
C124 C125 1.370(8) . ?
C124 H124 0.9500 . ?
C125 C126 1.368(8) . ?
C125 H125 0.9500 . ?
C126 C127 1.379(7) . ?
C126 H126 0.9500 . ?
C127 H127 0.9500 . ?
C128 H12A 0.9800 . ?
C128 H12B 0.9800 . ?
C128 H12C 0.9800 . ?
C129 C136 1.530(7) . ?
C129 C130 1.531(7) . ?
C129 H129 1.0000 . ?
C130 C131 1.384(7) . ?
C130 C135 1.386(7) . ?
C131 C132 1.390(8) . ?
C131 H131 0.9500 . ?
C132 C133 1.373(9) . ?
C132 H132 0.9500 . ?
C133 C134 1.368(10) . ?
C133 H133 0.9500 . ?
C134 C135 1.390(9) . ?
C134 H134 0.9500 . ?
C135 H135 0.9500 . ?
C136 C137 1.377(7) . ?
C136 C141 1.394(7) . ?
C137 C138 1.383(7) . ?
C137 H137 0.9500 . ?
C138 C139 1.361(8) . ?
C138 H138 0.9500 . ?
C139 C140 1.380(8) . ?
C139 H139 0.9500 . ?
C140 C141 1.372(7) . ?
C140 H140 0.9500 . ?
C141 H141 0.9500 . ?
C142 In2 2.173(5) . ?
C142 H14A 0.9800 . ?
C142 H14B 0.9800 . ?
C142 H14C 0.9800 . ?
C143 In2 2.204(4) . ?
C143 H14D 0.9800 . ?
C143 H14E 0.9800 . ?
C143 H14F 0.9800 . ?
C144 In2 2.200(5) . ?
C144 H14G 0.9800 . ?
C144 H14H 0.9800 . ?
C144 H14I 0.9800 . ?
 
loop_
 _geom_angle_atom_site_label_1
 _geom_angle_atom_site_label_2
 _geom_angle_atom_site_label_3
 _geom_angle
 _geom_angle_site_symmetry_1
 _geom_angle_site_symmetry_3
 _geom_angle_publ_flag
N2 C1 N1 103.7(4) . . ?
N2 C1 In1 124.0(3) . . ?
N1 C1 In1 132.1(3) . . ?
C3 C2 N1 107.8(4) . . ?
C3 C2 H2 126.1 . . ?
N1 C2 H2 126.1 . . ?
C2 C3 N2 105.8(4) . . ?
C2 C3 H3 127.1 . . ?
N2 C3 H3 127.1 . . ?
C5 C4 C9 120.8(5) . . ?
C5 C4 N1 118.5(5) . . ?
C9 C4 N1 120.6(4) . . ?
C6 C5 C4 118.6(5) . . ?
C6 C5 C10 119.0(4) . . ?
C4 C5 C10 122.4(5) . . ?
C7 C6 C5 121.7(5) . . ?
C7 C6 H6 119.2 . . ?
C5 C6 H6 119.2 . . ?
C6 C7 C8 118.8(5) . . ?
C6 C7 C23 119.9(5) . . ?
C8 C7 C23 121.3(5) . . ?
C7 C8 C9 122.0(5) . . ?
C7 C8 H8 119.0 . . ?
C9 C8 H8 119.0 . . ?
C8 C9 C4 118.1(5) . . ?
C8 C9 C24 119.9(5) . . ?
C4 C9 C24 122.0(5) . . ?
C11 C10 C5 113.3(4) . . ?
C11 C10 C17 112.1(4) . . ?
C5 C10 C17 108.9(4) . . ?
C11 C10 H10 107.4 . . ?
C5 C10 H10 107.4 . . ?
C17 C10 H10 107.4 . . ?
C16 C11 C12 118.0(5) . . ?
C16 C11 C10 119.0(5) . . ?
C12 C11 C10 122.9(5) . . ?
C11 C12 C13 120.9(6) . . ?
C11 C12 H12 119.6 . . ?
C13 C12 H12 119.6 . . ?
C14 C13 C12 120.1(6) . . ?
C14 C13 H13 119.9 . . ?
C12 C13 H13 119.9 . . ?
C13 C14 C15 119.7(6) . . ?
C13 C14 H14 120.2 . . ?
C15 C14 H14 120.2 . . ?
C16 C15 C14 119.9(6) . . ?
C16 C15 H15 120.0 . . ?
C14 C15 H15 120.0 . . ?
C11 C16 C15 121.4(6) . . ?
C11 C16 H16 119.3 . . ?
C15 C16 H16 119.3 . . ?
C22 C17 C18 118.9(5) . . ?
C22 C17 C10 123.1(4) . . ?
C18 C17 C10 117.7(5) . . ?
C19 C18 C17 120.4(5) . . ?
C19 C18 H18 119.8 . . ?
C17 C18 H18 119.8 . . ?
C20 C19 C18 120.2(5) . . ?
C20 C19 H19 119.9 . . ?
C18 C19 H19 119.9 . . ?
C19 C20 C21 120.3(5) . . ?
C19 C20 H20 119.9 . . ?
C21 C20 H20 119.9 . . ?
C20 C21 C22 119.1(5) . . ?
C20 C21 H21 120.4 . . ?
C22 C21 H21 120.4 . . ?
C17 C22 C21 121.1(5) . . ?
C17 C22 H22 119.5 . . ?
C21 C22 H22 119.5 . . ?
C7 C23 H23A 109.5 . . ?
C7 C23 H23B 109.5 . . ?
H23A C23 H23B 109.5 . . ?
C7 C23 H23C 109.5 . . ?
H23A C23 H23C 109.5 . . ?
H23B C23 H23C 109.5 . . ?
C31 C24 C9 113.2(4) . . ?
C31 C24 C25 113.1(4) . . ?
C9 C24 C25 109.9(4) . . ?
C31 C24 H24 106.7 . . ?
C9 C24 H24 106.7 . . ?
C25 C24 H24 106.7 . . ?
C30 C25 C26 117.8(6) . . ?
C30 C25 C24 123.2(5) . . ?
C26 C25 C24 118.9(5) . . ?
C27 C26 C25 121.1(6) . . ?
C27 C26 H26 119.5 . . ?
C25 C26 H26 119.5 . . ?
C28 C27 C26 120.1(7) . . ?
C28 C27 H27 119.9 . . ?
C26 C27 H27 119.9 . . ?
C27 C28 C29 119.6(7) . . ?
C27 C28 H28 120.2 . . ?
C29 C28 H28 120.2 . . ?
C28 C29 C30 120.1(6) . . ?
C28 C29 H29 119.9 . . ?
C30 C29 H29 119.9 . . ?
C25 C30 C29 121.2(6) . . ?
C25 C30 H30 119.4 . . ?
C29 C30 H30 119.4 . . ?
C32 C31 C36 118.5(5) . . ?
C32 C31 C24 122.7(5) . . ?
C36 C31 C24 118.8(5) . . ?
C31 C32 C33 120.3(6) . . ?
C31 C32 H32 119.8 . . ?
C33 C32 H32 119.8 . . ?
C34 C33 C32 120.3(7) . . ?
C34 C33 H33 119.9 . . ?
C32 C33 H33 119.9 . . ?
C35 C34 C33 119.9(7) . . ?
C35 C34 H34 120.0 . . ?
C33 C34 H34 120.0 . . ?
C34 C35 C36 119.8(7) . . ?
C34 C35 H35 120.1 . . ?
C36 C35 H35 120.1 . . ?
C31 C36 C35 121.1(6) . . ?
C31 C36 H36 119.4 . . ?
C35 C36 H36 119.4 . . ?
C42 C37 C38 121.9(4) . . ?
C42 C37 N2 118.7(4) . . ?
C38 C37 N2 119.4(4) . . ?
C39 C38 C37 117.9(4) . . ?
C39 C38 C43 121.7(4) . . ?
C37 C38 C43 119.8(4) . . ?
C38 C39 C40 121.5(5) . . ?
C38 C39 H39 119.3 . . ?
C40 C39 H39 119.3 . . ?
C41 C40 C39 118.7(4) . . ?
C41 C40 C56 121.1(5) . . ?
C39 C40 C56 120.1(5) . . ?
C40 C41 C42 122.4(5) . . ?
C40 C41 H41 118.8 . . ?
C42 C41 H41 118.8 . . ?
C41 C42 C37 117.1(5) . . ?
C41 C42 C57 121.6(4) . . ?
C37 C42 C57 121.2(4) . . ?
C44 C43 C38 115.5(4) . . ?
C44 C43 C50 114.1(4) . . ?
C38 C43 C50 107.1(4) . . ?
C44 C43 H43 106.5 . . ?
C38 C43 H43 106.5 . . ?
C50 C43 H43 106.5 . . ?
C49 C44 C45 117.0(5) . . ?
C49 C44 C43 122.2(4) . . ?
C45 C44 C43 120.7(4) . . ?
C46 C45 C44 121.5(5) . . ?
C46 C45 H45 119.3 . . ?
C44 C45 H45 119.3 . . ?
C45 C46 C47 120.6(5) . . ?
C45 C46 H46 119.7 . . ?
C47 C46 H46 119.7 . . ?
C48 C47 C46 119.1(5) . . ?
C48 C47 H47 120.4 . . ?
C46 C47 H47 120.4 . . ?
C47 C48 C49 120.3(5) . . ?
C47 C48 H48 119.9 . . ?
C49 C48 H48 119.9 . . ?
C44 C49 C48 121.5(5) . . ?
C44 C49 H49 119.2 . . ?
C48 C49 H49 119.2 . . ?
C55 C50 C51 118.3(5) . . ?
C55 C50 C43 121.0(4) . . ?
C51 C50 C43 120.7(5) . . ?
C52 C51 C50 120.3(6) . . ?
C52 C51 H51 119.8 . . ?
C50 C51 H51 119.8 . . ?
C53 C52 C51 120.3(5) . . ?
C53 C52 H52 119.8 . . ?
C51 C52 H52 119.8 . . ?
C54 C53 C52 120.2(5) . . ?
C54 C53 H53 119.9 . . ?
C52 C53 H53 119.9 . . ?
C53 C54 C55 119.5(6) . . ?
C53 C54 H54 120.2 . . ?
C55 C54 H54 120.2 . . ?
C50 C55 C54 121.4(5) . . ?
C50 C55 H55 119.3 . . ?
C54 C55 H55 119.3 . . ?
C40 C56 H56A 109.5 . . ?
C40 C56 H56B 109.5 . . ?
H56A C56 H56B 109.5 . . ?
C40 C56 H56C 109.5 . . ?
H56A C56 H56C 109.5 . . ?
H56B C56 H56C 109.5 . . ?
C58 C57 C42 112.3(4) . . ?
C58 C57 C64 114.0(4) . . ?
C42 C57 C64 110.9(4) . . ?
C58 C57 H57 106.3 . . ?
C42 C57 H57 106.3 . . ?
C64 C57 H57 106.3 . . ?
C59 C58 C63 117.4(5) . . ?
C59 C58 C57 123.5(5) . . ?
C63 C58 C57 119.1(5) . . ?
C58 C59 C60 120.7(6) . . ?
C58 C59 H59 119.7 . . ?
C60 C59 H59 119.7 . . ?
C61 C60 C59 120.9(6) . . ?
C61 C60 H60 119.5 . . ?
C59 C60 H60 119.5 . . ?
C60 C61 C62 119.7(6) . . ?
C60 C61 H61 120.2 . . ?
C62 C61 H61 120.2 . . ?
C61 C62 C63 119.5(6) . . ?
C61 C62 H62 120.3 . . ?
C63 C62 H62 120.3 . . ?
C58 C63 C62 121.9(6) . . ?
C58 C63 H63 119.1 . . ?
C62 C63 H63 119.1 . . ?
C69 C64 C65 118.9(5) . . ?
C69 C64 C57 119.7(5) . . ?
C65 C64 C57 121.4(5) . . ?
C66 C65 C64 119.4(6) . . ?
C66 C65 H65 120.3 . . ?
C64 C65 H65 120.3 . . ?
C67 C66 C65 121.5(6) . . ?
C67 C66 H66 119.2 . . ?
C65 C66 H66 119.2 . . ?
C66 C67 C68 119.5(6) . . ?
C66 C67 H67 120.3 . . ?
C68 C67 H67 120.3 . . ?
C67 C68 C69 119.3(6) . . ?
C67 C68 H68 120.3 . . ?
C69 C68 H68 120.3 . . ?
C64 C69 C68 121.4(6) . . ?
C64 C69 H69 119.3 . . ?
C68 C69 H69 119.3 . . ?
In1 C70 H70A 109.5 . . ?
In1 C70 H70B 109.5 . . ?
H70A C70 H70B 109.5 . . ?
In1 C70 H70C 109.5 . . ?
H70A C70 H70C 109.5 . . ?
H70B C70 H70C 109.5 . . ?
In1 C71 H71A 109.5 . . ?
In1 C71 H71B 109.5 . . ?
H71A C71 H71B 109.5 . . ?
In1 C71 H71C 109.5 . . ?
H71A C71 H71C 109.5 . . ?
H71B C71 H71C 109.5 . . ?
In1 C72 H72A 109.5 . . ?
In1 C72 H72B 109.5 . . ?
H72A C72 H72B 109.5 . . ?
In1 C72 H72C 109.5 . . ?
H72A C72 H72C 109.5 . . ?
H72B C72 H72C 109.5 . . ?
N4 C73 N3 103.4(4) . . ?
N4 C73 In2 128.8(3) . . ?
N3 C73 In2 127.6(3) . . ?
C75 C74 N3 107.1(4) . . ?
C75 C74 H74 126.5 . . ?
N3 C74 H74 126.5 . . ?
C74 C75 N4 106.2(4) . . ?
C74 C75 H75 126.9 . . ?
N4 C75 H75 126.9 . . ?
C81 C76 C77 122.0(4) . . ?
C81 C76 N3 118.6(4) . . ?
C77 C76 N3 119.3(4) . . ?
C78 C77 C76 117.4(5) . . ?
C78 C77 C82 122.0(4) . . ?
C76 C77 C82 120.5(4) . . ?
C79 C78 C77 122.1(5) . . ?
C79 C78 H78 118.9 . . ?
C77 C78 H78 118.9 . . ?
C80 C79 C78 118.5(4) . . ?
C80 C79 C95 120.9(5) . . ?
C78 C79 C95 120.7(4) . . ?
C79 C80 C81 122.3(5) . . ?
C79 C80 H80 118.9 . . ?
C81 C80 H80 118.9 . . ?
C76 C81 C80 117.6(4) . . ?
C76 C81 C96 121.7(4) . . ?
C80 C81 C96 120.5(5) . . ?
C83 C82 C77 110.4(4) . . ?
C83 C82 C89 109.6(4) . . ?
C77 C82 C89 116.0(4) . . ?
C83 C82 H82 106.8 . . ?
C77 C82 H82 106.8 . . ?
C89 C82 H82 106.8 . . ?
C88 C83 C84 117.9(5) . . ?
C88 C83 C82 120.3(5) . . ?
C84 C83 C82 121.8(5) . . ?
C85 C84 C83 119.8(5) . . ?
C85 C84 H84 120.1 . . ?
C83 C84 H84 120.1 . . ?
C86 C85 C84 120.5(5) . . ?
C86 C85 H85 119.7 . . ?
C84 C85 H85 119.7 . . ?
C87 C86 C85 120.4(6) . . ?
C87 C86 H86 119.8 . . ?
C85 C86 H86 119.8 . . ?
C86 C87 C88 119.5(6) . . ?
C86 C87 H87 120.2 . . ?
C88 C87 H87 120.2 . . ?
C83 C88 C87 121.9(5) . . ?
C83 C88 H88 119.1 . . ?
C87 C88 H88 119.1 . . ?
C90 C89 C94 117.7(5) . . ?
C90 C89 C82 120.8(5) . . ?
C94 C89 C82 121.4(5) . . ?
C89 C90 C91 121.7(6) . . ?
C89 C90 H90 119.2 . . ?
C91 C90 H90 119.2 . . ?
C92 C91 C90 119.3(6) . . ?
C92 C91 H91 120.3 . . ?
C90 C91 H91 120.3 . . ?
C93 C92 C91 120.5(6) . . ?
C93 C92 H92 119.8 . . ?
C91 C92 H92 119.8 . . ?
C92 C93 C94 120.6(6) . . ?
C92 C93 H93 119.7 . . ?
C94 C93 H93 119.7 . . ?
C93 C94 C89 120.2(6) . . ?
C93 C94 H94 119.9 . . ?
C89 C94 H94 119.9 . . ?
C79 C95 H95A 109.5 . . ?
C79 C95 H95B 109.5 . . ?
H95A C95 H95B 109.5 . . ?
C79 C95 H95C 109.5 . . ?
H95A C95 H95C 109.5 . . ?
H95B C95 H95C 109.5 . . ?
C97 C96 C81 113.7(4) . . ?
C97 C96 C103 112.0(4) . . ?
C81 C96 C103 112.0(4) . . ?
C97 C96 H96 106.1 . . ?
C81 C96 H96 106.1 . . ?
C103 C96 H96 106.1 . . ?
C102 C97 C98 117.0(5) . . ?
C102 C97 C96 121.9(5) . . ?
C98 C97 C96 121.1(5) . . ?
C97 C98 C99 121.0(6) . . ?
C97 C98 H98 119.5 . . ?
C99 C98 H98 119.5 . . ?
C100 C99 C98 120.3(6) . . ?
C100 C99 H99 119.8 . . ?
C98 C99 H99 119.8 . . ?
C101 C100 C99 119.6(6) . . ?
C101 C100 H100 120.2 . . ?
C99 C100 H100 120.2 . . ?
C100 C101 C102 120.1(6) . . ?
C100 C101 H101 120.0 . . ?
C102 C101 H101 120.0 . . ?
C101 C102 C97 122.0(5) . . ?
C101 C102 H102 119.0 . . ?
C97 C102 H102 119.0 . . ?
C104 C103 C108 117.6(5) . . ?
C104 C103 C96 123.6(5) . . ?
C108 C103 C96 118.7(5) . . ?
C103 C104 C105 121.6(6) . . ?
C103 C104 H104 119.2 . . ?
C105 C104 H104 119.2 . . ?
C106 C105 C104 119.6(7) . . ?
C106 C105 H105 120.2 . . ?
C104 C105 H105 120.2 . . ?
C105 C106 C107 119.9(7) . . ?
C105 C106 H106 120.1 . . ?
C107 C106 H106 120.1 . . ?
C106 C107 C108 121.2(6) . . ?
C106 C107 H107 119.4 . . ?
C108 C107 H107 119.4 . . ?
C107 C108 C103 120.1(6) . . ?
C107 C108 H108 120.0 . . ?
C103 C108 H108 120.0 . . ?
C110 C109 C114 122.6(4) . . ?
C110 C109 N4 118.0(4) . . ?
C114 C109 N4 119.4(4) . . ?
C109 C110 C111 117.4(5) . . ?
C109 C110 C115 121.9(4) . . ?
C111 C110 C115 120.5(4) . . ?
C112 C111 C110 122.0(5) . . ?
C112 C111 H111 119.0 . . ?
C110 C111 H111 119.0 . . ?
C111 C112 C113 118.6(4) . . ?
C111 C112 C128 120.0(4) . . ?
C113 C112 C128 121.5(5) . . ?
C112 C113 C114 122.1(5) . . ?
C112 C113 H113 118.9 . . ?
C114 C113 H113 118.9 . . ?
C113 C114 C109 117.1(4) . . ?
C113 C114 C129 120.8(4) . . ?
C109 C114 C129 121.9(4) . . ?
C116 C115 C110 111.0(4) . . ?
C116 C115 C122 113.7(4) . . ?
C110 C115 C122 111.0(4) . . ?
C116 C115 H115 106.9 . . ?
C110 C115 H115 106.9 . . ?
C122 C115 H115 106.9 . . ?
C117 C116 C121 118.5(5) . . ?
C117 C116 C115 118.3(5) . . ?
C121 C116 C115 123.1(5) . . ?
C116 C117 C118 121.5(6) . . ?
C116 C117 H117 119.3 . . ?
C118 C117 H117 119.3 . . ?
C119 C118 C117 119.6(6) . . ?
C119 C118 H118 120.2 . . ?
C117 C118 H118 120.2 . . ?
C120 C119 C118 119.6(6) . . ?
C120 C119 H119 120.2 . . ?
C118 C119 H119 120.2 . . ?
C119 C120 C121 120.5(6) . . ?
C119 C120 H120 119.8 . . ?
C121 C120 H120 119.8 . . ?
C116 C121 C120 120.2(6) . . ?
C116 C121 H121 119.9 . . ?
C120 C121 H121 119.9 . . ?
C123 C122 C127 117.2(5) . . ?
C123 C122 C115 120.0(5) . . ?
C127 C122 C115 122.8(5) . . ?
C122 C123 C124 121.5(6) . . ?
C122 C123 H123 119.3 . . ?
C124 C123 H123 119.3 . . ?
C125 C124 C123 120.0(6) . . ?
C125 C124 H124 120.0 . . ?
C123 C124 H124 120.0 . . ?
C126 C125 C124 119.6(6) . . ?
C126 C125 H125 120.2 . . ?
C124 C125 H125 120.2 . . ?
C125 C126 C127 120.4(6) . . ?
C125 C126 H126 119.8 . . ?
C127 C126 H126 119.8 . . ?
C126 C127 C122 121.3(5) . . ?
C126 C127 H127 119.4 . . ?
C122 C127 H127 119.4 . . ?
C112 C128 H12A 109.5 . . ?
C112 C128 H12B 109.5 . . ?
H12A C128 H12B 109.5 . . ?
C112 C128 H12C 109.5 . . ?
H12A C128 H12C 109.5 . . ?
H12B C128 H12C 109.5 . . ?
C114 C129 C136 111.7(4) . . ?
C114 C129 C130 112.3(4) . . ?
C136 C129 C130 112.9(4) . . ?
C114 C129 H129 106.5 . . ?
C136 C129 H129 106.5 . . ?
C130 C129 H129 106.5 . . ?
C131 C130 C135 118.3(5) . . ?
C131 C130 C129 121.9(5) . . ?
C135 C130 C129 119.7(5) . . ?
C130 C131 C132 120.7(6) . . ?
C130 C131 H131 119.7 . . ?
C132 C131 H131 119.7 . . ?
C133 C132 C131 120.7(7) . . ?
C133 C132 H132 119.7 . . ?
C131 C132 H132 119.7 . . ?
C134 C133 C132 119.0(7) . . ?
C134 C133 H133 120.5 . . ?
C132 C133 H133 120.5 . . ?
C133 C134 C135 121.0(7) . . ?
C133 C134 H134 119.5 . . ?
C135 C134 H134 119.5 . . ?
C130 C135 C134 120.3(6) . . ?
C130 C135 H135 119.8 . . ?
C134 C135 H135 119.8 . . ?
C137 C136 C141 117.8(5) . . ?
C137 C136 C129 123.0(5) . . ?
C141 C136 C129 119.2(5) . . ?
C136 C137 C138 121.2(6) . . ?
C136 C137 H137 119.4 . . ?
C138 C137 H137 119.4 . . ?
C139 C138 C137 120.4(6) . . ?
C139 C138 H138 119.8 . . ?
C137 C138 H138 119.8 . . ?
C138 C139 C140 119.4(6) . . ?
C138 C139 H139 120.3 . . ?
C140 C139 H139 120.3 . . ?
C141 C140 C139 120.4(6) . . ?
C141 C140 H140 119.8 . . ?
C139 C140 H140 119.8 . . ?
C140 C141 C136 120.8(6) . . ?
C140 C141 H141 119.6 . . ?
C136 C141 H141 119.6 . . ?
In2 C142 H14A 109.5 . . ?
In2 C142 H14B 109.5 . . ?
H14A C142 H14B 109.5 . . ?
In2 C142 H14C 109.5 . . ?
H14A C142 H14C 109.5 . . ?
H14B C142 H14C 109.5 . . ?
In2 C143 H14D 109.5 . . ?
In2 C143 H14E 109.5 . . ?
H14D C143 H14E 109.5 . . ?
In2 C143 H14F 109.5 . . ?
H14D C143 H14F 109.5 . . ?
H14E C143 H14F 109.5 . . ?
In2 C144 H14G 109.5 . . ?
In2 C144 H14H 109.5 . . ?
H14G C144 H14H 109.5 . . ?
In2 C144 H14I 109.5 . . ?
H14G C144 H14I 109.5 . . ?
H14H C144 H14I 109.5 . . ?
C1 N1 C2 110.4(4) . . ?
C1 N1 C4 127.6(4) . . ?
C2 N1 C4 121.7(4) . . ?
C1 N2 C3 112.3(4) . . ?
C1 N2 C37 122.8(4) . . ?
C3 N2 C37 124.4(4) . . ?
C73 N3 C74 111.6(4) . . ?
C73 N3 C76 123.2(4) . . ?
C74 N3 C76 124.9(4) . . ?
C73 N4 C75 111.7(4) . . ?
C73 N4 C109 124.7(4) . . ?
C75 N4 C109 123.2(4) . . ?
C72 In1 C71 113.64(17) . . ?
C72 In1 C70 116.16(19) . . ?
C71 In1 C70 107.77(18) . . ?
C72 In1 C1 103.20(17) . . ?
C71 In1 C1 113.14(17) . . ?
C70 In1 C1 102.43(16) . . ?
C142 In2 C144 108.07(19) . . ?
C142 In2 C143 114.50(19) . . ?
C144 In2 C143 114.23(19) . . ?
C142 In2 C73 108.59(17) . . ?
C144 In2 C73 102.22(17) . . ?
C143 In2 C73 108.41(16) . . ?
 
loop_
 _geom_torsion_atom_site_label_1
 _geom_torsion_atom_site_label_2
 _geom_torsion_atom_site_label_3
 _geom_torsion_atom_site_label_4
 _geom_torsion
 _geom_torsion_site_symmetry_1
 _geom_torsion_site_symmetry_2
 _geom_torsion_site_symmetry_3
 _geom_torsion_site_symmetry_4
 _geom_torsion_publ_flag
N1 C2 C3 N2 -0.8(5) . . . . ?
C9 C4 C5 C6 0.8(7) . . . . ?
N1 C4 C5 C6 -176.6(4) . . . . ?
C9 C4 C5 C10 -179.0(4) . . . . ?
N1 C4 C5 C10 3.6(6) . . . . ?
C4 C5 C6 C7 0.3(7) . . . . ?
C10 C5 C6 C7 -179.9(4) . . . . ?
C5 C6 C7 C8 -1.4(7) . . . . ?
C5 C6 C7 C23 179.6(4) . . . . ?
C6 C7 C8 C9 1.5(7) . . . . ?
C23 C7 C8 C9 -179.6(4) . . . . ?
C7 C8 C9 C4 -0.4(7) . . . . ?
C7 C8 C9 C24 177.9(4) . . . . ?
C5 C4 C9 C8 -0.8(7) . . . . ?
N1 C4 C9 C8 176.6(4) . . . . ?
C5 C4 C9 C24 -179.1(4) . . . . ?
N1 C4 C9 C24 -1.7(7) . . . . ?
C6 C5 C10 C11 89.3(5) . . . . ?
C4 C5 C10 C11 -90.9(5) . . . . ?
C6 C5 C10 C17 -36.1(6) . . . . ?
C4 C5 C10 C17 143.7(4) . . . . ?
C5 C10 C11 C16 162.1(5) . . . . ?
C17 C10 C11 C16 -74.1(6) . . . . ?
C5 C10 C11 C12 -20.8(7) . . . . ?
C17 C10 C11 C12 103.0(6) . . . . ?
C16 C11 C12 C13 -0.6(8) . . . . ?
C10 C11 C12 C13 -177.7(5) . . . . ?
C11 C12 C13 C14 -0.5(9) . . . . ?
C12 C13 C14 C15 1.0(10) . . . . ?
C13 C14 C15 C16 -0.4(10) . . . . ?
C12 C11 C16 C15 1.2(9) . . . . ?
C10 C11 C16 C15 178.4(5) . . . . ?
C14 C15 C16 C11 -0.7(10) . . . . ?
C11 C10 C17 C22 -20.4(7) . . . . ?
C5 C10 C17 C22 105.8(6) . . . . ?
C11 C10 C17 C18 165.6(5) . . . . ?
C5 C10 C17 C18 -68.2(6) . . . . ?
C22 C17 C18 C19 -0.2(8) . . . . ?
C10 C17 C18 C19 174.0(5) . . . . ?
C17 C18 C19 C20 -1.4(9) . . . . ?
C18 C19 C20 C21 1.7(9) . . . . ?
C19 C20 C21 C22 -0.3(9) . . . . ?
C18 C17 C22 C21 1.7(8) . . . . ?
C10 C17 C22 C21 -172.3(5) . . . . ?
C20 C21 C22 C17 -1.5(8) . . . . ?
C8 C9 C24 C31 -99.9(6) . . . . ?
C4 C9 C24 C31 78.4(6) . . . . ?
C8 C9 C24 C25 27.7(6) . . . . ?
C4 C9 C24 C25 -154.1(4) . . . . ?
C31 C24 C25 C30 20.9(7) . . . . ?
C9 C24 C25 C30 -106.7(5) . . . . ?
C31 C24 C25 C26 -163.1(5) . . . . ?
C9 C24 C25 C26 69.3(6) . . . . ?
C30 C25 C26 C27 -1.1(8) . . . . ?
C24 C25 C26 C27 -177.3(5) . . . . ?
C25 C26 C27 C28 1.8(10) . . . . ?
C26 C27 C28 C29 -0.7(10) . . . . ?
C27 C28 C29 C30 -1.1(10) . . . . ?
C26 C25 C30 C29 -0.7(8) . . . . ?
C24 C25 C30 C29 175.3(5) . . . . ?
C28 C29 C30 C25 1.8(10) . . . . ?
C9 C24 C31 C32 15.6(8) . . . . ?
C25 C24 C31 C32 -110.3(6) . . . . ?
C9 C24 C31 C36 -165.5(5) . . . . ?
C25 C24 C31 C36 68.7(7) . . . . ?
C36 C31 C32 C33 -0.4(10) . . . . ?
C24 C31 C32 C33 178.6(6) . . . . ?
C31 C32 C33 C34 0.0(12) . . . . ?
C32 C33 C34 C35 -0.2(13) . . . . ?
C33 C34 C35 C36 0.8(12) . . . . ?
C32 C31 C36 C35 1.0(10) . . . . ?
C24 C31 C36 C35 -178.0(6) . . . . ?
C34 C35 C36 C31 -1.2(11) . . . . ?
C42 C37 C38 C39 -7.0(7) . . . . ?
N2 C37 C38 C39 174.5(4) . . . . ?
C42 C37 C38 C43 164.4(4) . . . . ?
N2 C37 C38 C43 -14.1(7) . . . . ?
C37 C38 C39 C40 2.1(7) . . . . ?
C43 C38 C39 C40 -169.2(4) . . . . ?
C38 C39 C40 C41 3.0(7) . . . . ?
C38 C39 C40 C56 -178.0(5) . . . . ?
C39 C40 C41 C42 -3.4(7) . . . . ?
C56 C40 C41 C42 177.6(5) . . . . ?
C40 C41 C42 C37 -1.3(7) . . . . ?
C40 C41 C42 C57 175.2(4) . . . . ?
C38 C37 C42 C41 6.6(7) . . . . ?
N2 C37 C42 C41 -174.9(4) . . . . ?
C38 C37 C42 C57 -169.9(4) . . . . ?
N2 C37 C42 C57 8.6(7) . . . . ?
C39 C38 C43 C44 -28.2(6) . . . . ?
C37 C38 C43 C44 160.7(4) . . . . ?
C39 C38 C43 C50 100.1(5) . . . . ?
C37 C38 C43 C50 -71.0(5) . . . . ?
C38 C43 C44 C49 139.6(5) . . . . ?
C50 C43 C44 C49 14.8(7) . . . . ?
C38 C43 C44 C45 -44.5(7) . . . . ?
C50 C43 C44 C45 -169.3(5) . . . . ?
C49 C44 C45 C46 0.8(8) . . . . ?
C43 C44 C45 C46 -175.3(5) . . . . ?
C44 C45 C46 C47 0.0(8) . . . . ?
C45 C46 C47 C48 -1.1(9) . . . . ?
C46 C47 C48 C49 1.5(9) . . . . ?
C45 C44 C49 C48 -0.4(8) . . . . ?
C43 C44 C49 C48 175.6(5) . . . . ?
C47 C48 C49 C44 -0.7(9) . . . . ?
C44 C43 C50 C55 86.8(6) . . . . ?
C38 C43 C50 C55 -42.3(6) . . . . ?
C44 C43 C50 C51 -96.6(5) . . . . ?
C38 C43 C50 C51 134.2(5) . . . . ?
C55 C50 C51 C52 0.8(8) . . . . ?
C43 C50 C51 C52 -175.8(5) . . . . ?
C50 C51 C52 C53 0.2(8) . . . . ?
C51 C52 C53 C54 -1.5(9) . . . . ?
C52 C53 C54 C55 1.8(9) . . . . ?
C51 C50 C55 C54 -0.5(8) . . . . ?
C43 C50 C55 C54 176.1(5) . . . . ?
C53 C54 C55 C50 -0.8(8) . . . . ?
C41 C42 C57 C58 -77.9(5) . . . . ?
C37 C42 C57 C58 98.4(5) . . . . ?
C41 C42 C57 C64 51.0(6) . . . . ?
C37 C42 C57 C64 -132.7(5) . . . . ?
C42 C57 C58 C59 -3.4(7) . . . . ?
C64 C57 C58 C59 -130.6(5) . . . . ?
C42 C57 C58 C63 178.8(4) . . . . ?
C64 C57 C58 C63 51.5(6) . . . . ?
C63 C58 C59 C60 -1.4(8) . . . . ?
C57 C58 C59 C60 -179.3(5) . . . . ?
C58 C59 C60 C61 1.0(9) . . . . ?
C59 C60 C61 C62 0.0(9) . . . . ?
C60 C61 C62 C63 -0.4(9) . . . . ?
C59 C58 C63 C62 1.0(8) . . . . ?
C57 C58 C63 C62 179.0(5) . . . . ?
C61 C62 C63 C58 -0.1(9) . . . . ?
C58 C57 C64 C69 -144.3(5) . . . . ?
C42 C57 C64 C69 87.7(6) . . . . ?
C58 C57 C64 C65 36.1(7) . . . . ?
C42 C57 C64 C65 -91.8(6) . . . . ?
C69 C64 C65 C66 -0.9(8) . . . . ?
C57 C64 C65 C66 178.7(5) . . . . ?
C64 C65 C66 C67 0.6(9) . . . . ?
C65 C66 C67 C68 -0.4(10) . . . . ?
C66 C67 C68 C69 0.4(10) . . . . ?
C65 C64 C69 C68 0.9(8) . . . . ?
C57 C64 C69 C68 -178.7(5) . . . . ?
C67 C68 C69 C64 -0.7(9) . . . . ?
N3 C74 C75 N4 0.9(5) . . . . ?
C81 C76 C77 C78 3.6(7) . . . . ?
N3 C76 C77 C78 -178.7(4) . . . . ?
C81 C76 C77 C82 -171.6(4) . . . . ?
N3 C76 C77 C82 6.0(7) . . . . ?
C76 C77 C78 C79 -2.8(7) . . . . ?
C82 C77 C78 C79 172.4(5) . . . . ?
C77 C78 C79 C80 1.0(7) . . . . ?
C77 C78 C79 C95 -177.8(5) . . . . ?
C78 C79 C80 C81 0.1(7) . . . . ?
C95 C79 C80 C81 178.9(5) . . . . ?
C77 C76 C81 C80 -2.6(7) . . . . ?
N3 C76 C81 C80 179.7(4) . . . . ?
C77 C76 C81 C96 172.1(4) . . . . ?
N3 C76 C81 C96 -5.5(7) . . . . ?
C79 C80 C81 C76 0.7(7) . . . . ?
C79 C80 C81 C96 -174.1(4) . . . . ?
C78 C77 C82 C83 -110.1(5) . . . . ?
C76 C77 C82 C83 64.9(5) . . . . ?
C78 C77 C82 C89 15.3(7) . . . . ?
C76 C77 C82 C89 -169.7(4) . . . . ?
C77 C82 C83 C88 -146.5(4) . . . . ?
C89 C82 C83 C88 84.6(5) . . . . ?
C77 C82 C83 C84 33.3(6) . . . . ?
C89 C82 C83 C84 -95.6(6) . . . . ?
C88 C83 C84 C85 -0.2(7) . . . . ?
C82 C83 C84 C85 180.0(4) . . . . ?
C83 C84 C85 C86 0.1(8) . . . . ?
C84 C85 C86 C87 0.5(8) . . . . ?
C85 C86 C87 C88 -1.0(8) . . . . ?
C84 C83 C88 C87 -0.3(7) . . . . ?
C82 C83 C88 C87 179.5(5) . . . . ?
C86 C87 C88 C83 0.9(8) . . . . ?
C83 C82 C89 C90 -125.5(5) . . . . ?
C77 C82 C89 C90 108.7(6) . . . . ?
C83 C82 C89 C94 51.0(6) . . . . ?
C77 C82 C89 C94 -74.8(6) . . . . ?
C94 C89 C90 C91 1.2(8) . . . . ?
C82 C89 C90 C91 177.8(5) . . . . ?
C89 C90 C91 C92 -0.1(9) . . . . ?
C90 C91 C92 C93 0.0(10) . . . . ?
C91 C92 C93 C94 -1.1(10) . . . . ?
C92 C93 C94 C89 2.2(9) . . . . ?
C90 C89 C94 C93 -2.2(8) . . . . ?
C82 C89 C94 C93 -178.8(5) . . . . ?
C76 C81 C96 C97 144.9(5) . . . . ?
C80 C81 C96 C97 -40.4(6) . . . . ?
C76 C81 C96 C103 -86.8(5) . . . . ?
C80 C81 C96 C103 87.8(6) . . . . ?
C81 C96 C97 C102 88.3(6) . . . . ?
C103 C96 C97 C102 -40.0(6) . . . . ?
C81 C96 C97 C98 -91.3(6) . . . . ?
C103 C96 C97 C98 140.4(5) . . . . ?
C102 C97 C98 C99 0.0(8) . . . . ?
C96 C97 C98 C99 179.6(5) . . . . ?
C97 C98 C99 C100 -0.8(10) . . . . ?
C98 C99 C100 C101 1.0(10) . . . . ?
C99 C100 C101 C102 -0.4(9) . . . . ?
C100 C101 C102 C97 -0.5(9) . . . . ?
C98 C97 C102 C101 0.7(8) . . . . ?
C96 C97 C102 C101 -178.9(5) . . . . ?
C97 C96 C103 C104 126.3(5) . . . . ?
C81 C96 C103 C104 -2.8(7) . . . . ?
C97 C96 C103 C108 -54.2(6) . . . . ?
C81 C96 C103 C108 176.7(5) . . . . ?
C108 C103 C104 C105 -1.7(8) . . . . ?
C96 C103 C104 C105 177.8(5) . . . . ?
C103 C104 C105 C106 0.3(10) . . . . ?
C104 C105 C106 C107 0.3(10) . . . . ?
C105 C106 C107 C108 0.5(11) . . . . ?
C106 C107 C108 C103 -1.9(10) . . . . ?
C104 C103 C108 C107 2.5(8) . . . . ?
C96 C103 C108 C107 -177.1(5) . . . . ?
C114 C109 C110 C111 5.5(7) . . . . ?
N4 C109 C110 C111 -175.0(4) . . . . ?
C114 C109 C110 C115 -169.7(4) . . . . ?
N4 C109 C110 C115 9.7(7) . . . . ?
C109 C110 C111 C112 -3.5(7) . . . . ?
C115 C110 C111 C112 171.8(5) . . . . ?
C110 C111 C112 C113 -1.0(8) . . . . ?
C110 C111 C112 C128 179.7(5) . . . . ?
C111 C112 C113 C114 3.8(7) . . . . ?
C128 C112 C113 C114 -176.9(5) . . . . ?
C112 C113 C114 C109 -1.9(7) . . . . ?
C112 C113 C114 C129 -175.9(4) . . . . ?
C110 C109 C114 C113 -2.9(7) . . . . ?
N4 C109 C114 C113 177.6(4) . . . . ?
C110 C109 C114 C129 171.1(4) . . . . ?
N4 C109 C114 C129 -8.4(7) . . . . ?
C109 C110 C115 C116 -146.6(5) . . . . ?
C111 C110 C115 C116 38.3(6) . . . . ?
C109 C110 C115 C122 86.0(5) . . . . ?
C111 C110 C115 C122 -89.1(5) . . . . ?
C110 C115 C116 C117 72.0(6) . . . . ?
C122 C115 C116 C117 -162.0(5) . . . . ?
C110 C115 C116 C121 -105.2(6) . . . . ?
C122 C115 C116 C121 20.7(7) . . . . ?
C121 C116 C117 C118 -0.7(9) . . . . ?
C115 C116 C117 C118 -178.0(6) . . . . ?
C116 C117 C118 C119 1.4(10) . . . . ?
C117 C118 C119 C120 -0.5(10) . . . . ?
C118 C119 C120 C121 -0.9(10) . . . . ?
C117 C116 C121 C120 -0.8(8) . . . . ?
C115 C116 C121 C120 176.4(5) . . . . ?
C119 C120 C121 C116 1.6(9) . . . . ?
C116 C115 C122 C123 90.3(5) . . . . ?
C110 C115 C122 C123 -143.7(5) . . . . ?
C116 C115 C122 C127 -90.5(6) . . . . ?
C110 C115 C122 C127 35.4(6) . . . . ?
C127 C122 C123 C124 0.8(8) . . . . ?
C115 C122 C123 C124 179.9(5) . . . . ?
C122 C123 C124 C125 0.1(9) . . . . ?
C123 C124 C125 C126 -0.9(9) . . . . ?
C124 C125 C126 C127 0.7(9) . . . . ?
C125 C126 C127 C122 0.2(9) . . . . ?
C123 C122 C127 C126 -0.9(8) . . . . ?
C115 C122 C127 C126 179.9(5) . . . . ?
C113 C114 C129 C136 -34.7(6) . . . . ?
C109 C114 C129 C136 151.5(4) . . . . ?
C113 C114 C129 C130 93.3(5) . . . . ?
C109 C114 C129 C130 -80.4(6) . . . . ?
C114 C129 C130 C131 -15.2(7) . . . . ?
C136 C129 C130 C131 112.1(5) . . . . ?
C114 C129 C130 C135 167.3(4) . . . . ?
C136 C129 C130 C135 -65.3(6) . . . . ?
C135 C130 C131 C132 -0.3(8) . . . . ?
C129 C130 C131 C132 -177.8(5) . . . . ?
C130 C131 C132 C133 1.0(9) . . . . ?
C131 C132 C133 C134 -1.5(10) . . . . ?
C132 C133 C134 C135 1.3(10) . . . . ?
C131 C130 C135 C134 0.0(8) . . . . ?
C129 C130 C135 C134 177.6(5) . . . . ?
C133 C134 C135 C130 -0.5(10) . . . . ?
C114 C129 C136 C137 121.2(5) . . . . ?
C130 C129 C136 C137 -6.4(6) . . . . ?
C114 C129 C136 C141 -58.3(6) . . . . ?
C130 C129 C136 C141 174.0(4) . . . . ?
C141 C136 C137 C138 0.0(7) . . . . ?
C129 C136 C137 C138 -179.6(4) . . . . ?
C136 C137 C138 C139 1.1(8) . . . . ?
C137 C138 C139 C140 -1.6(8) . . . . ?
C138 C139 C140 C141 1.1(8) . . . . ?
C139 C140 C141 C136 0.0(8) . . . . ?
C137 C136 C141 C140 -0.5(7) . . . . ?
C129 C136 C141 C140 179.1(4) . . . . ?
N2 C1 N1 C2 1.3(5) . . . . ?
In1 C1 N1 C2 176.0(3) . . . . ?
N2 C1 N1 C4 174.4(4) . . . . ?
In1 C1 N1 C4 -11.0(7) . . . . ?
C3 C2 N1 C1 -0.3(6) . . . . ?
C3 C2 N1 C4 -173.8(4) . . . . ?
C5 C4 N1 C1 -101.7(6) . . . . ?
C9 C4 N1 C1 80.9(6) . . . . ?
C5 C4 N1 C2 70.7(5) . . . . ?
C9 C4 N1 C2 -106.8(5) . . . . ?
N1 C1 N2 C3 -1.9(5) . . . . ?
In1 C1 N2 C3 -177.1(3) . . . . ?
N1 C1 N2 C37 -174.2(4) . . . . ?
In1 C1 N2 C37 10.6(6) . . . . ?
C2 C3 N2 C1 1.8(5) . . . . ?
C2 C3 N2 C37 173.9(4) . . . . ?
C42 C37 N2 C1 89.9(6) . . . . ?
C38 C37 N2 C1 -91.6(5) . . . . ?
C42 C37 N2 C3 -81.5(6) . . . . ?
C38 C37 N2 C3 97.1(6) . . . . ?
N4 C73 N3 C74 0.9(5) . . . . ?
In2 C73 N3 C74 176.3(3) . . . . ?
N4 C73 N3 C76 175.3(4) . . . . ?
In2 C73 N3 C76 -9.4(6) . . . . ?
C75 C74 N3 C73 -1.2(6) . . . . ?
C75 C74 N3 C76 -175.4(4) . . . . ?
C81 C76 N3 C73 -89.1(6) . . . . ?
C77 C76 N3 C73 93.2(6) . . . . ?
C81 C76 N3 C74 84.6(6) . . . . ?
C77 C76 N3 C74 -93.2(6) . . . . ?
N3 C73 N4 C75 -0.3(5) . . . . ?
In2 C73 N4 C75 -175.6(3) . . . . ?
N3 C73 N4 C109 -173.6(4) . . . . ?
In2 C73 N4 C109 11.1(7) . . . . ?
C74 C75 N4 C73 -0.4(6) . . . . ?
C74 C75 N4 C109 173.0(4) . . . . ?
C110 C109 N4 C73 94.1(6) . . . . ?
C114 C109 N4 C73 -86.4(6) . . . . ?
C110 C109 N4 C75 -78.5(6) . . . . ?
C114 C109 N4 C75 101.0(5) . . . . ?
 
_refine_diff_density_max    1.505
_refine_diff_density_min   -1.289
_refine_diff_density_rms    0.099

_shelxl_version_number 2013-4

_shelx_res_file
;
TITL mo_sdab151112_0m in P-1
CELL  0.71073  11.7755  19.8637  24.5189   96.283   93.717   90.052
ZERR     4.00   0.0010   0.0017   0.0022    0.002    0.002    0.002
LATT   1
SFAC  C    H    N    IN
UNIT  288  260  8    4
MERG   2
EADP C5 C6
EADP C70 C71 C72
EADP C142 C143 C144
FMAP   2
PLAN   10
SIZE     0.080   0.120   0.180
ACTA
BOND   $H
CONF
L.S.   8
TEMP  -100.00
WGHT    0.041300
FVAR       0.07672
C1    1   -0.041806    0.277296    0.227123    11.00000    0.02043    0.01232 =
         0.01183    0.00088    0.00088    0.00605
C2    1   -0.209030    0.225903    0.239443    11.00000    0.01792    0.01758 =
         0.02581   -0.00418    0.00921    0.00142
AFIX  43
H2    2   -0.287765    0.219613    0.243838    11.00000   -1.20000
AFIX   0
C3    1   -0.129274    0.178171    0.239639    11.00000    0.02014    0.01142 =
         0.02331   -0.00341    0.01131   -0.00076
AFIX  43
H3    2   -0.139630    0.131849    0.244597    11.00000   -1.20000
AFIX   0
C4    1   -0.217234    0.350220    0.234765    11.00000    0.01507    0.01170 =
         0.02778   -0.00143    0.00007   -0.00055
C5    1   -0.248820    0.378936    0.286093    11.00000    0.01838    0.02191 =
         0.01742   -0.00214    0.00489    0.00325
C6    1   -0.312627    0.437659    0.288811    11.00000    0.01838    0.02191 =
         0.01742   -0.00214    0.00489    0.00325
AFIX  43
H6    2   -0.334171    0.457630    0.323575    11.00000   -1.20000
AFIX   0
C7    1   -0.345567    0.467773    0.242430    11.00000    0.01890    0.01713 =
         0.02582    0.00004    0.00022    0.00756
C8    1   -0.311712    0.439259    0.192258    11.00000    0.02106    0.02478 =
         0.01914    0.00450    0.00002    0.00607
AFIX  43
H8    2   -0.332728    0.460533    0.160270    11.00000   -1.20000
AFIX   0
C9    1   -0.247918    0.380469    0.187094    11.00000    0.01988    0.02404 =
         0.02081    0.00240   -0.00110    0.00163
C10   1   -0.215303    0.348099    0.339198    11.00000    0.01770    0.01983 =
         0.02057    0.00140    0.00356    0.00871
AFIX  13
H10   2   -0.142731    0.322944    0.333570    11.00000   -1.20000
AFIX   0
C11   1   -0.303168    0.297619    0.354006    11.00000    0.02609    0.02001 =
         0.02390   -0.00102    0.00695    0.00082
C12   1   -0.415676    0.296714    0.333543    11.00000    0.02938    0.03550 =
         0.03311    0.01131   -0.00087    0.00272
AFIX  43
H12   2   -0.439890    0.327458    0.308147    11.00000   -1.20000
AFIX   0
C13   1   -0.493435    0.251498    0.349654    11.00000    0.03123    0.03590 =
         0.05641    0.00836    0.00711   -0.00383
AFIX  43
H13   2   -0.570465    0.251711    0.335517    11.00000   -1.20000
AFIX   0
C14   1   -0.459442    0.206613    0.385848    11.00000    0.04722    0.03194 =
         0.07447    0.01376    0.01477   -0.00618
AFIX  43
H14   2   -0.512386    0.175142    0.396426    11.00000   -1.20000
AFIX   0
C15   1   -0.347856    0.207268    0.406924    11.00000    0.05414    0.03835 =
         0.07045    0.03339    0.00318    0.00141
AFIX  43
H15   2   -0.323874    0.176419    0.432274    11.00000   -1.20000
AFIX   0
C16   1   -0.271194    0.252775    0.391134    11.00000    0.03260    0.03774 =
         0.05452    0.02056   -0.00021    0.00250
AFIX  43
H16   2   -0.194756    0.253201    0.406174    11.00000   -1.20000
AFIX   0
C17   1   -0.190562    0.405485    0.385654    11.00000    0.02348    0.01932 =
         0.01680    0.00308    0.00079    0.00754
C18   1   -0.094867    0.445767    0.383060    11.00000    0.03597    0.03151 =
         0.01877    0.00175    0.00468   -0.00091
AFIX  43
H18   2   -0.043615    0.434602    0.355143    11.00000   -1.20000
AFIX   0
C19   1   -0.073884    0.502004    0.420901    11.00000    0.04446    0.03897 =
         0.03463    0.00882   -0.00201   -0.01181
AFIX  43
H19   2   -0.007419    0.528704    0.419393    11.00000   -1.20000
AFIX   0
C20   1   -0.149175    0.519458    0.460840    11.00000    0.05986    0.02968 =
         0.03271   -0.00409   -0.00591    0.00427
AFIX  43
H20   2   -0.135387    0.558826    0.486113    11.00000   -1.20000
AFIX   0
C21   1   -0.244441    0.479969    0.464235    11.00000    0.04647    0.03340 =
         0.01978    0.00043    0.00835    0.01522
AFIX  43
H21   2   -0.296224    0.491795    0.491793    11.00000   -1.20000
AFIX   0
C22   1   -0.263697    0.422485    0.426686    11.00000    0.02639    0.02640 =
         0.02211    0.00509    0.00280    0.00599
AFIX  43
H22   2   -0.328193    0.394567    0.429387    11.00000   -1.20000
AFIX   0
C23   1   -0.415197    0.531118    0.247179    11.00000    0.03734    0.02702 =
         0.02630   -0.00044    0.00375    0.01474
AFIX 137
H23A  2   -0.495980    0.519308    0.239851    11.00000   -1.50000
H23B  2   -0.392197    0.560829    0.220398    11.00000   -1.50000
H23C  2   -0.402895    0.554591    0.284389    11.00000   -1.50000
AFIX   0
C24   1   -0.216160    0.349698    0.130342    11.00000    0.02323    0.02725 =
         0.01807   -0.00212    0.00393    0.00938
AFIX  13
H24   2   -0.137529    0.331340    0.135136    11.00000   -1.20000
AFIX   0
C25   1   -0.209787    0.405528    0.091753    11.00000    0.03461    0.02940 =
         0.01826   -0.00095    0.00740    0.01891
C26   1   -0.121745    0.453131    0.101308    11.00000    0.04719    0.04073 =
         0.02951    0.00727    0.00449    0.00570
AFIX  43
H26   2   -0.065450    0.449250    0.130325    11.00000   -1.20000
AFIX   0
C27   1   -0.115010    0.505638    0.069421    11.00000    0.08794    0.04161 =
         0.04170    0.00818    0.01134    0.00073
AFIX  43
H27   2   -0.053209    0.536881    0.075857    11.00000   -1.20000
AFIX   0
C28   1   -0.197560    0.512999    0.028243    11.00000    0.11512    0.03751 =
         0.02741    0.01351    0.02258    0.02356
AFIX  43
H28   2   -0.193440    0.549529    0.006452    11.00000   -1.20000
AFIX   0
C29   1   -0.286132    0.467144    0.018802    11.00000    0.09577    0.05620 =
         0.02236    0.01155   -0.00864    0.03083
AFIX  43
H29   2   -0.344096    0.472448   -0.009167    11.00000   -1.20000
AFIX   0
C30   1   -0.290982    0.413428    0.049881    11.00000    0.05792    0.03946 =
         0.01603   -0.00215   -0.00368    0.02112
AFIX  43
H30   2   -0.351348    0.381331    0.042281    11.00000   -1.20000
AFIX   0
C31   1   -0.292507    0.290452    0.106378    11.00000    0.03224    0.03128 =
         0.02707   -0.00027   -0.00099    0.00666
C32   1   -0.395569    0.277319    0.126837    11.00000    0.04074    0.05887 =
         0.04565   -0.01286   -0.00266   -0.00969
AFIX  43
H32   2   -0.420520    0.305266    0.157649    11.00000   -1.20000
AFIX   0
C33   1   -0.463918    0.222807    0.102355    11.00000    0.04522    0.07952 =
         0.08868   -0.01091   -0.00672   -0.01596
AFIX  43
H33   2   -0.534870    0.214075    0.116674    11.00000   -1.20000
AFIX   0
C34   1   -0.428544    0.182049    0.057762    11.00000    0.07261    0.05563 =
         0.08903   -0.01479   -0.02925   -0.00561
AFIX  43
H34   2   -0.474883    0.145149    0.041398    11.00000   -1.20000
AFIX   0
C35   1   -0.326536    0.194678    0.036968    11.00000    0.09398    0.04503 =
         0.05500   -0.01922   -0.01725    0.01511
AFIX  43
H35   2   -0.302354    0.166920    0.005881    11.00000   -1.20000
AFIX   0
C36   1   -0.258044    0.248512    0.061585    11.00000    0.05879    0.03210 =
         0.04569   -0.00402   -0.00312    0.00552
AFIX  43
H36   2   -0.186667    0.256517    0.047398    11.00000   -1.20000
AFIX   0
C37   1    0.082466    0.178709    0.233457    11.00000    0.01691    0.01308 =
         0.01810    0.00217    0.00142    0.00227
C38   1    0.127887    0.151133    0.184699    11.00000    0.01454    0.01207 =
         0.01926    0.00200    0.00342    0.00324
C39   1    0.237882    0.126516    0.187900    11.00000    0.02283    0.01844 =
         0.01950   -0.00438    0.00882    0.00277
AFIX  43
H39   2    0.271278    0.108934    0.155117    11.00000   -1.20000
AFIX   0
C40   1    0.300468    0.126957    0.237971    11.00000    0.01952    0.01181 =
         0.02776   -0.00077    0.00585    0.00371
C41   1    0.249548    0.149589    0.285290    11.00000    0.02176    0.01636 =
         0.02336    0.00435   -0.00687    0.00341
AFIX  43
H41   2    0.290856    0.147615    0.319662    11.00000   -1.20000
AFIX   0
C42   1    0.139539    0.175343    0.284769    11.00000    0.02369    0.01463 =
         0.01587    0.00159    0.00414   -0.00006
C43   1    0.051461    0.139814    0.131814    11.00000    0.02099    0.01165 =
         0.01793   -0.00109    0.00072    0.00279
AFIX  13
H43   2    0.002946    0.180990    0.130655    11.00000   -1.20000
AFIX   0
C44   1    0.112898    0.132136    0.078754    11.00000    0.01895    0.01761 =
         0.02298    0.00631    0.00358    0.00629
C45   1    0.202088    0.175539    0.071330    11.00000    0.03110    0.02142 =
         0.01879   -0.00073    0.00248   -0.00086
AFIX  43
H45   2    0.228263    0.208003    0.100825    11.00000   -1.20000
AFIX   0
C46   1    0.252980    0.172503    0.022454    11.00000    0.02767    0.03368 =
         0.03118    0.01071    0.00757   -0.00034
AFIX  43
H46   2    0.313696    0.202759    0.018523    11.00000   -1.20000
AFIX   0
C47   1    0.216868    0.125928   -0.021080    11.00000    0.03818    0.04173 =
         0.02181    0.00822    0.01353    0.00559
AFIX  43
H47   2    0.251353    0.124450   -0.055156    11.00000   -1.20000
AFIX   0
C48   1    0.130843    0.081939   -0.014556    11.00000    0.04643    0.03400 =
         0.01729   -0.00984    0.00868    0.00189
AFIX  43
H48   2    0.106460    0.048912   -0.043980    11.00000   -1.20000
AFIX   0
C49   1    0.078921    0.085279    0.034846    11.00000    0.03050    0.02300 =
         0.02628    0.00300    0.00202   -0.00162
AFIX  43
H49   2    0.018622    0.054653    0.038582    11.00000   -1.20000
AFIX   0
C50   1   -0.028870    0.080851    0.137886    11.00000    0.01825    0.02530 =
         0.01280   -0.00827    0.00421   -0.00117
C51   1   -0.144790    0.084903    0.123433    11.00000    0.02249    0.03262 =
         0.03470   -0.00709   -0.00008    0.00143
AFIX  43
H51   2   -0.173780    0.123317    0.107379    11.00000   -1.20000
AFIX   0
C52   1   -0.218257    0.033038    0.132379    11.00000    0.02616    0.04974 =
         0.04256   -0.01347    0.01032   -0.00772
AFIX  43
H52   2   -0.297205    0.036113    0.122319    11.00000   -1.20000
AFIX   0
C53   1   -0.177229   -0.022797    0.155749    11.00000    0.04799    0.04411 =
         0.03402   -0.00731    0.01169   -0.02322
AFIX  43
H53   2   -0.228171   -0.057572    0.162569    11.00000   -1.20000
AFIX   0
C54   1   -0.063163   -0.028318    0.169184    11.00000    0.04979    0.02495 =
         0.03024    0.00937   -0.00223   -0.00792
AFIX  43
H54   2   -0.034463   -0.067416    0.184323    11.00000   -1.20000
AFIX   0
C55   1    0.010545    0.023874    0.160478    11.00000    0.02965    0.02905 =
         0.03051    0.00491   -0.00079   -0.00546
AFIX  43
H55   2    0.089492    0.020168    0.170286    11.00000   -1.20000
AFIX   0
C56   1    0.421662    0.101796    0.239818    11.00000    0.01998    0.03606 =
         0.03410    0.00438    0.00140    0.00904
AFIX 137
H56A  2    0.474087    0.140151    0.239868    11.00000   -1.50000
H56B  2    0.431970    0.069271    0.207505    11.00000   -1.50000
H56C  2    0.437476    0.079658    0.273277    11.00000   -1.50000
AFIX   0
C57   1    0.080782    0.195190    0.338008    11.00000    0.02323    0.01835 =
         0.02386    0.00672   -0.00056    0.00619
AFIX  13
H57   2    0.012768    0.222361    0.327781    11.00000   -1.20000
AFIX   0
C58   1    0.035516    0.133651    0.362357    11.00000    0.01894    0.02419 =
         0.02361    0.00440    0.00283    0.00477
C59   1    0.041620    0.068126    0.337344    11.00000    0.03463    0.02092 =
         0.04442    0.00387    0.01847    0.00826
AFIX  43
H59   2    0.076215    0.059698    0.303346    11.00000   -1.20000
AFIX   0
C60   1   -0.002249    0.014462    0.361349    11.00000    0.04003    0.02471 =
         0.07683    0.00578    0.01708    0.00226
AFIX  43
H60   2    0.003730   -0.030365    0.343840    11.00000   -1.20000
AFIX   0
C61   1   -0.053892    0.025193    0.409786    11.00000    0.03134    0.04716 =
         0.06304    0.02785    0.01271   -0.00562
AFIX  43
H61   2   -0.083629   -0.011948    0.425828    11.00000   -1.20000
AFIX   0
C62   1   -0.062592    0.089576    0.435064    11.00000    0.03096    0.06380 =
         0.04064    0.00902    0.01649   -0.00844
AFIX  43
H62   2   -0.098811    0.097559    0.468656    11.00000   -1.20000
AFIX   0
C63   1   -0.017963    0.143392    0.411208    11.00000    0.03656    0.03308 =
         0.03241   -0.00178    0.00673   -0.00328
AFIX  43
H63   2   -0.024383    0.188072    0.428950    11.00000   -1.20000
AFIX   0
C64   1    0.157242    0.242359    0.378684    11.00000    0.02781    0.02022 =
         0.01338    0.00077    0.00567    0.00083
C65   1    0.231309    0.216941    0.417845    11.00000    0.03042    0.03068 =
         0.02306   -0.00234    0.00098    0.00320
AFIX  43
H65   2    0.234506    0.169615    0.420497    11.00000   -1.20000
AFIX   0
C66   1    0.299945    0.261025    0.452728    11.00000    0.03220    0.07316 =
         0.02756   -0.00826   -0.00039   -0.00296
AFIX  43
H66   2    0.351016    0.243515    0.479181    11.00000   -1.20000
AFIX   0
C67   1    0.296270    0.329590    0.450160    11.00000    0.05471    0.06259 =
         0.03630   -0.02659    0.00961   -0.02673
AFIX  43
H67   2    0.343962    0.359196    0.474745    11.00000   -1.20000
AFIX   0
C68   1    0.223077    0.355162    0.411754    11.00000    0.07747    0.02652 =
         0.04486   -0.00549    0.01945   -0.01858
AFIX  43
H68   2    0.220038    0.402552    0.409390    11.00000   -1.20000
AFIX   0
C69   1    0.153526    0.311006    0.376396    11.00000    0.05343    0.02404 =
         0.02271    0.00193    0.00475    0.00054
AFIX  43
H69   2    0.102359    0.328741    0.350102    11.00000   -1.20000
AFIX   0
C70   1    0.099420    0.335930    0.117332    11.00000    0.02187    0.01608 =
         0.01874    0.00117    0.00624    0.00139
AFIX 137
H70A  2    0.073766    0.377843    0.102914    11.00000   -1.50000
H70B  2    0.046844    0.298898    0.103166    11.00000   -1.50000
H70C  2    0.175899    0.324975    0.105662    11.00000   -1.50000
AFIX   0
C71   1    0.270836    0.319764    0.240064    11.00000    0.02187    0.01608 =
         0.01874    0.00117    0.00624    0.00139
AFIX 137
H71A  2    0.328669    0.350426    0.229395    11.00000   -1.50000
H71B  2    0.286238    0.273318    0.224606    11.00000   -1.50000
H71C  2    0.273021    0.322044    0.280248    11.00000   -1.50000
AFIX   0
C72   1    0.050086    0.447931    0.246039    11.00000    0.02187    0.01608 =
         0.01874    0.00117    0.00624    0.00139
AFIX 137
H72A  2    0.080803    0.455121    0.284357    11.00000   -1.50000
H72B  2   -0.033212    0.449442    0.244843    11.00000   -1.50000
H72C  2    0.078609    0.483538    0.225694    11.00000   -1.50000
AFIX   0
C73   1    0.343744    0.779808    0.281492    11.00000    0.01862    0.01860 =
         0.00890    0.00263    0.00175    0.00214
C74   1    0.510001    0.725509    0.266660    11.00000    0.02001    0.02040 =
         0.01792   -0.00420    0.00654    0.00252
AFIX  43
H74   2    0.588756    0.718131    0.262315    11.00000   -1.20000
AFIX   0
C75   1    0.427493    0.677813    0.261579    11.00000    0.02181    0.01272 =
         0.01931   -0.00344    0.00412    0.00422
AFIX  43
H75   2    0.436597    0.630330    0.253475    11.00000   -1.20000
AFIX   0
C76   1    0.516697    0.852442    0.284505    11.00000    0.01422    0.01022 =
         0.01719   -0.00160    0.00637    0.00440
C77   1    0.561128    0.880811    0.336360    11.00000    0.01754    0.01645 =
         0.02280    0.00252    0.00376    0.00314
C78   1    0.613790    0.944263    0.339591    11.00000    0.02241    0.01612 =
         0.02603   -0.00537   -0.00204    0.00313
AFIX  43
H78   2    0.641559    0.965416    0.374543    11.00000   -1.20000
AFIX   0
C79   1    0.626879    0.977413    0.293430    11.00000    0.01492    0.01573 =
         0.02605    0.00238    0.00093    0.00156
C80   1    0.584771    0.946754    0.243058    11.00000    0.01883    0.02016 =
         0.02857    0.00706    0.00503    0.00176
AFIX  43
H80   2    0.593583    0.969170    0.211280    11.00000   -1.20000
AFIX   0
C81   1    0.529531    0.883811    0.237070    11.00000    0.01239    0.01854 =
         0.02113   -0.00188    0.00791    0.00409
C82   1    0.559634    0.840635    0.386019    11.00000    0.02004    0.01797 =
         0.02379    0.00268    0.00466   -0.00173
AFIX  13
H82   2    0.480023    0.823503    0.387107    11.00000   -1.20000
AFIX   0
C83   1    0.635619    0.778506    0.378230    11.00000    0.02211    0.02112 =
         0.01989    0.00115   -0.00318   -0.00317
C84   1    0.735022    0.779173    0.349943    11.00000    0.02762    0.02555 =
         0.03051    0.00826   -0.00207   -0.00434
AFIX  43
H84   2    0.756955    0.818969    0.334941    11.00000   -1.20000
AFIX   0
C85   1    0.801509    0.721431    0.343881    11.00000    0.02365    0.03772 =
         0.04137    0.00087    0.00479    0.00532
AFIX  43
H85   2    0.869043    0.721935    0.324727    11.00000   -1.20000
AFIX   0
C86   1    0.770229    0.663296    0.365473    11.00000    0.03786    0.02775 =
         0.04353    0.00568    0.00065    0.01398
AFIX  43
H86   2    0.816657    0.624217    0.361330    11.00000   -1.20000
AFIX   0
C87   1    0.673558    0.661698    0.392567    11.00000    0.05145    0.02241 =
         0.03551    0.00427    0.00657   -0.00381
AFIX  43
H87   2    0.651551    0.621447    0.406885    11.00000   -1.20000
AFIX   0
C88   1    0.607112    0.719245    0.399206    11.00000    0.03184    0.02771 =
         0.02221    0.00272    0.01001   -0.00200
AFIX  43
H88   2    0.540138    0.717974    0.418698    11.00000   -1.20000
AFIX   0
C89   1    0.590676    0.880325    0.442021    11.00000    0.03965    0.01204 =
         0.02154    0.00366    0.00290    0.00333
C90   1    0.508954    0.895756    0.479149    11.00000    0.05703    0.02527 =
         0.02148    0.00302    0.00185    0.00884
AFIX  43
H90   2    0.432128    0.882797    0.469059    11.00000   -1.20000
AFIX   0
C91   1    0.536090    0.929729    0.530868    11.00000    0.08591    0.02765 =
         0.03386   -0.00314    0.00845    0.01298
AFIX  43
H91   2    0.478470    0.939958    0.555810    11.00000   -1.20000
AFIX   0
C92   1    0.647518    0.948484    0.545682    11.00000    0.10827    0.01879 =
         0.02578   -0.00289   -0.01738   -0.00160
AFIX  43
H92   2    0.666715    0.971737    0.581033    11.00000   -1.20000
AFIX   0
C93   1    0.730182    0.933931    0.510044    11.00000    0.07351    0.03368 =
         0.03919    0.00788   -0.02267   -0.01562
AFIX  43
H93   2    0.806457    0.947797    0.520494    11.00000   -1.20000
AFIX   0
C94   1    0.704247    0.899133    0.458727    11.00000    0.03780    0.02999 =
         0.03318    0.00636   -0.00328   -0.00422
AFIX  43
H94   2    0.763081    0.887869    0.434664    11.00000   -1.20000
AFIX   0
C95   1    0.688181    1.045160    0.298282    11.00000    0.03259    0.02489 =
         0.03925    0.00751   -0.00211   -0.00756
AFIX 137
H95A  2    0.686230    1.061979    0.262122    11.00000   -1.50000
H95B  2    0.767434    1.039670    0.311780    11.00000   -1.50000
H95C  2    0.650507    1.077625    0.324080    11.00000   -1.50000
AFIX   0
C96   1    0.494217    0.848506    0.179917    11.00000    0.02287    0.02818 =
         0.02432    0.00605    0.00631   -0.00708
AFIX  13
H96   2    0.430778    0.816758    0.185025    11.00000   -1.20000
AFIX   0
C97   1    0.446182    0.896398    0.139905    11.00000    0.03167    0.02571 =
         0.01579   -0.00114    0.00131   -0.00262
C98   1    0.330374    0.909066    0.134456    11.00000    0.03052    0.05382 =
         0.03973    0.00678    0.01120    0.00360
AFIX  43
H98   2    0.280034    0.887297    0.155832    11.00000   -1.20000
AFIX   0
C99   1    0.286921    0.953181    0.098147    11.00000    0.03429    0.07165 =
         0.05244    0.01129    0.00163    0.01843
AFIX  43
H99   2    0.207289    0.960820    0.094580    11.00000   -1.20000
AFIX   0
C100  1    0.358282    0.985604    0.067563    11.00000    0.06382    0.04599 =
         0.03612    0.01244   -0.00539    0.01881
AFIX  43
H100  2    0.328570    1.016280    0.043232    11.00000   -1.20000
AFIX   0
C101  1    0.472433    0.973651    0.072184    11.00000    0.04884    0.04147 =
         0.02813    0.01397    0.00372    0.00092
AFIX  43
H101  2    0.522330    0.995830    0.050859    11.00000   -1.20000
AFIX   0
C102  1    0.515374    0.929434    0.107759    11.00000    0.03087    0.03380 =
         0.02980    0.01287   -0.00045   -0.00423
AFIX  43
H102  2    0.594964    0.921409    0.110270    11.00000   -1.20000
AFIX   0
C103  1    0.589344    0.804503    0.155959    11.00000    0.03389    0.01815 =
         0.03071    0.00589    0.01318   -0.00276
C104  1    0.697112    0.799940    0.182285    11.00000    0.03221    0.02972 =
         0.04462    0.00313    0.01812    0.00591
AFIX  43
H104  2    0.714521    0.826463    0.216457    11.00000   -1.20000
AFIX   0
C105  1    0.779952    0.757394    0.159674    11.00000    0.04476    0.04415 =
         0.07684    0.01440    0.02128    0.01176
AFIX  43
H105  2    0.852763    0.754881    0.178401    11.00000   -1.20000
AFIX   0
C106  1    0.755780    0.719246    0.110319    11.00000    0.07246    0.03966 =
         0.07706    0.00856    0.04772    0.01335
AFIX  43
H106  2    0.811722    0.689973    0.094750    11.00000   -1.20000
AFIX   0
C107  1    0.650528    0.723366    0.083352    11.00000    0.09501    0.03317 =
         0.04098   -0.00354    0.03252   -0.00434
AFIX  43
H107  2    0.634176    0.696459    0.049263    11.00000   -1.20000
AFIX   0
C108  1    0.567709    0.766067    0.104964    11.00000    0.06052    0.02327 =
         0.03839    0.00418    0.01600   -0.00005
AFIX  43
H108  2    0.496209    0.769257    0.085160    11.00000   -1.20000
AFIX   0
C109  1    0.215825    0.679311    0.262840    11.00000    0.01296    0.01424 =
         0.01542   -0.00337    0.00206    0.00235
C110  1    0.167563    0.665662    0.209251    11.00000    0.02176    0.01207 =
         0.01733    0.00135    0.00661    0.00331
C111  1    0.056901    0.639098    0.202673    11.00000    0.02474    0.01988 =
         0.01908   -0.00312   -0.00057   -0.00099
AFIX  43
H111  2    0.020570    0.631770    0.166761    11.00000   -1.20000
AFIX   0
C112  1   -0.001013    0.623241    0.246615    11.00000    0.01803    0.01653 =
         0.02566   -0.00327    0.00340    0.00092
C113  1    0.053585    0.633199    0.298994    11.00000    0.01930    0.01530 =
         0.02168   -0.00270    0.01086    0.00073
AFIX  43
H113  2    0.015806    0.619800    0.329190    11.00000   -1.20000
AFIX   0
C114  1    0.161997    0.662222    0.308569    11.00000    0.01561    0.01115 =
         0.01601   -0.00208    0.00392    0.00542
C115  1    0.234956    0.673853    0.159209    11.00000    0.02413    0.01984 =
         0.01824    0.00054    0.00615   -0.00517
AFIX  13
H115  2    0.291994    0.710905    0.170522    11.00000   -1.20000
AFIX   0
C116  1    0.158145    0.696867    0.112423    11.00000    0.03045    0.02894 =
         0.01882    0.00488    0.00219   -0.00449
C117  1    0.119626    0.762140    0.117583    11.00000    0.06353    0.03068 =
         0.03534    0.00755   -0.00430    0.00401
AFIX  43
H117  2    0.143383    0.791737    0.149371    11.00000   -1.20000
AFIX   0
C118  1    0.046682    0.786026    0.077432    11.00000    0.07332    0.04068 =
         0.05862    0.01626    0.00305    0.02063
AFIX  43
H118  2    0.022226    0.831761    0.081418    11.00000   -1.20000
AFIX   0
C119  1    0.010040    0.743165    0.031894    11.00000    0.04017    0.07255 =
         0.03465    0.01731    0.00488    0.02214
AFIX  43
H119  2   -0.040424    0.758989    0.004359    11.00000   -1.20000
AFIX   0
C120  1    0.046501    0.677746    0.026417    11.00000    0.04021    0.06521 =
         0.01851    0.00334    0.00174    0.00729
AFIX  43
H120  2    0.020372    0.647850   -0.004791    11.00000   -1.20000
AFIX   0
C121  1    0.121996    0.654395    0.066371    11.00000    0.03712    0.03470 =
         0.02629    0.00476    0.00366    0.01034
AFIX  43
H121  2    0.148459    0.609092    0.061754    11.00000   -1.20000
AFIX   0
C122  1    0.302005    0.609617    0.142640    11.00000    0.02221    0.03286 =
         0.01460   -0.00041    0.00269    0.00053
C123  1    0.408552    0.614548    0.122873    11.00000    0.02949    0.04957 =
         0.02728   -0.00352    0.01117   -0.00480
AFIX  43
H123  2    0.439386    0.658053    0.119696    11.00000   -1.20000
AFIX   0
C124  1    0.471528    0.557417    0.107562    11.00000    0.02305    0.07292 =
         0.03458   -0.00755    0.01115    0.00464
AFIX  43
H124  2    0.544695    0.562065    0.094134    11.00000   -1.20000
AFIX   0
C125  1    0.428303    0.494285    0.111785    11.00000    0.03911    0.05561 =
         0.03222   -0.00643   -0.00464    0.02536
AFIX  43
H125  2    0.470838    0.455055    0.100839    11.00000   -1.20000
AFIX   0
C126  1    0.323508    0.488058    0.131863    11.00000    0.05090    0.03629 =
         0.04178    0.00308    0.00768    0.00847
AFIX  43
H126  2    0.293688    0.444363    0.135246    11.00000   -1.20000
AFIX   0
C127  1    0.260929    0.544851    0.147216    11.00000    0.03514    0.02862 =
         0.03799    0.00698    0.01301    0.00428
AFIX  43
H127  2    0.188407    0.539689    0.161181    11.00000   -1.20000
AFIX   0
C128  1   -0.121259    0.594797    0.237284    11.00000    0.01974    0.02861 =
         0.03513   -0.00487    0.00389   -0.00506
AFIX 137
H12A  2   -0.175691    0.632138    0.238505    11.00000   -1.50000
H12B  2   -0.135822    0.565937    0.266073    11.00000   -1.50000
H12C  2   -0.129886    0.567954    0.201249    11.00000   -1.50000
AFIX   0
C129  1    0.222330    0.668108    0.365517    11.00000    0.02231    0.02258 =
         0.01973    0.00513    0.00118   -0.00543
AFIX  13
H129  2    0.272937    0.708959    0.368284    11.00000   -1.20000
AFIX   0
C130  1    0.300005    0.607804    0.373723    11.00000    0.01354    0.03022 =
         0.03116    0.01240    0.00779   -0.00188
C131  1    0.292110    0.548405    0.338460    11.00000    0.02990    0.02838 =
         0.04374    0.01462    0.01108    0.00841
AFIX  43
H131  2    0.238988    0.545024    0.307407    11.00000   -1.20000
AFIX   0
C132  1    0.361112    0.493647    0.348016    11.00000    0.05404    0.03828 =
         0.06895    0.01982    0.02254    0.01757
AFIX  43
H132  2    0.355561    0.453459    0.323109    11.00000   -1.20000
AFIX   0
C133  1    0.437258    0.497052    0.393115    11.00000    0.03523    0.06194 =
         0.10770    0.04837    0.02009    0.01887
AFIX  43
H133  2    0.483068    0.459181    0.400034    11.00000   -1.20000
AFIX   0
C134  1    0.446138    0.555796    0.427918    11.00000    0.02267    0.08223 =
         0.08022    0.05652   -0.00264    0.00332
AFIX  43
H134  2    0.499691    0.558855    0.458796    11.00000   -1.20000
AFIX   0
C135  1    0.377974    0.611103    0.418790    11.00000    0.02651    0.05526 =
         0.04617    0.02275    0.00183   -0.00723
AFIX  43
H135  2    0.384885    0.651362    0.443574    11.00000   -1.20000
AFIX   0
C136  1    0.138674    0.681521    0.410589    11.00000    0.02014    0.02695 =
         0.01499   -0.00019   -0.00223   -0.00624
C137  1    0.126966    0.639262    0.450832    11.00000    0.03254    0.03152 =
         0.02048    0.00613    0.00420   -0.00354
AFIX  43
H137  2    0.172743    0.599942    0.451244    11.00000   -1.20000
AFIX   0
C138  1    0.049767    0.653041    0.490653    11.00000    0.03931    0.04301 =
         0.01901    0.00617    0.00218   -0.00876
AFIX  43
H138  2    0.044028    0.623627    0.518422    11.00000   -1.20000
AFIX   0
C139  1   -0.018071    0.708468    0.490338    11.00000    0.03968    0.04817 =
         0.01775   -0.00845    0.01466   -0.00605
AFIX  43
H139  2   -0.072425    0.717212    0.517172    11.00000   -1.20000
AFIX   0
C140  1   -0.007122    0.751845    0.450650    11.00000    0.03953    0.03515 =
         0.03432   -0.00428    0.00851    0.01100
AFIX  43
H140  2   -0.053279    0.791040    0.450580    11.00000   -1.20000
AFIX   0
C141  1    0.070010    0.738707    0.411301    11.00000    0.03885    0.02605 =
         0.02443    0.00678    0.00540    0.00372
AFIX  43
H141  2    0.076703    0.768953    0.384208    11.00000   -1.20000
AFIX   0
C142  1    0.268042    0.957187    0.276530    11.00000    0.02451    0.01508 =
         0.03279   -0.00118    0.00998    0.00702
AFIX 137
H14A  2    0.234115    0.995772    0.297859    11.00000   -1.50000
H14B  2    0.243419    0.957061    0.237565    11.00000   -1.50000
H14C  2    0.351183    0.960945    0.281084    11.00000   -1.50000
AFIX   0
C143  1    0.042857    0.827778    0.272646    11.00000    0.02451    0.01508 =
         0.03279   -0.00118    0.00998    0.00702
AFIX 137
H14D  2   -0.015052    0.854527    0.292020    11.00000   -1.50000
H14E  2    0.033844    0.779934    0.277981    11.00000   -1.50000
H14F  2    0.033889    0.832946    0.233309    11.00000   -1.50000
AFIX   0
C144  1    0.236068    0.875370    0.395862    11.00000    0.02451    0.01508 =
         0.03279   -0.00118    0.00998    0.00702
AFIX 137
H14G  2    0.293496    0.910524    0.407927    11.00000   -1.50000
H14H  2    0.261124    0.832358    0.408543    11.00000   -1.50000
H14I  2    0.163626    0.888473    0.411349    11.00000   -1.50000
AFIX   0
N1    3   -0.156032    0.286732    0.231623    11.00000    0.01738    0.01312 =
         0.01370   -0.00120    0.00446    0.00436
N2    3   -0.027896    0.210243    0.231087    11.00000    0.01298    0.01162 =
         0.01682   -0.00232    0.00349    0.00517
N3    3    0.458789    0.786826    0.279309    11.00000    0.01513    0.01504 =
         0.01461    0.00257    0.00304    0.00131
N4    3    0.326457    0.711987    0.270566    11.00000    0.01364    0.00884 =
         0.01680    0.00033    0.00554    0.00261
IN1   4    0.103404    0.349743    0.208859    11.00000    0.02266    0.01907 =
         0.03594    0.00354    0.00234   -0.00140
IN2   4    0.213524    0.863595    0.305537    11.00000    0.02332    0.01572 =
         0.04456    0.00222    0.01053    0.00604
HKLF    4  1.0  1.00  0.00  0.00  0.00  1.00  0.00  0.00  0.00  1.00

REM  mo_sdab151112_0m in P-1
REM R1 =  0.0886 for   12789 Fo > 4sig(Fo)  and  0.2006 for all   27504 data
REM   1331 parameters refined using      0 restraints

END

WGHT      0.0412      0.0000

REM Highest difference peak  1.505,  deepest hole -1.289,  1-sigma level  0.099
Q1    1   0.2473  0.8314  0.2782  11.00000  0.05    1.43
Q2    1   0.1796  0.8945  0.3287  11.00000  0.05    1.37
Q3    1   0.1355  0.3214  0.1821  11.00000  0.05    1.29
Q4    1   0.0934  0.3545  0.2480  11.00000  0.05    1.28
Q5    1   0.0773  0.3733  0.2429  11.00000  0.05    1.27
Q6    1   0.2041  0.8686  0.3492  11.00000  0.05    0.94
Q7    1   0.1977  0.8506  0.3108  11.00000  0.05    0.71
Q8    1   0.0934  0.2972  0.2421  11.00000  0.05    0.65
Q9    1   0.2007  0.8094  0.3406  11.00000  0.05    0.62
Q10   1   0.3020  0.9668  0.3044  11.00000  0.05    0.60
;
_shelx_res_checksum   65641

_shelx_hkl_file
;
  -1   0   0  102.71    1.52
  -1   0   0   96.16    1.50
   1   0   0  100.90    1.73
   1   0   0   87.26    1.70
   1   0   0  103.55    1.52
   1   0   0  102.70    1.47
   1   0   0   94.24    1.61
   1   0   0  103.31    1.53
  -2   0   0  101.01    2.42
  -2   0   0   96.12    1.80
   2   0   0  102.34    2.42
   2   0   0   96.08    1.90
   2   0   0   99.37    1.79
   2   0   0  100.67    1.98
   2   0   0  100.04    1.98
  -3   0   0    9.03    1.25
   3   0   0    6.70    1.15
   3   0   0    7.99    1.36
   3   0   0    8.92    1.22
   3   0   0    6.73    1.82
  -4   0   0   81.50    2.09
   4   0   0   83.61    2.56
   4   0   0   82.95    3.10
   4   0   0   80.60    2.15
   4   0   0   82.78    2.58
   4   0   0   84.11    2.02
  -5   0   0    7.50    1.33
   5   0   0    6.23    1.17
   5   0   0    5.43    2.13
   5   0   0    6.65    1.39
   5   0   0    5.71    1.36
   5   0   0    7.40    1.47
  -6   0   0   35.73    2.12
   6   0   0   34.81    1.87
   6   0   0   37.38    3.32
   6   0   0   37.62    2.84
   6   0   0   39.61    2.87
   7   0   0    8.57    1.39
   7   0   0    4.84    2.45
   7   0   0    8.00    1.84
   7   0   0    6.39    1.77
   8   0   0    0.10    1.89
   8   0   0   -0.24    1.80
   8   0   0   -2.68    2.65
   8   0   0   -0.12    1.35
   9   0   0   52.03    2.18
   9   0   0   54.47    4.16
   9   0   0   55.31    4.28
   9   0   0   49.48    4.63
  10   0   0   16.12    2.82
  10   0   0   15.88    2.85
  10   0   0   17.92    1.82
  10   0   0   13.54    3.90
  11   0   0   12.24    2.78
  11   0   0   13.33    1.29
  11   0   0   10.28    2.93
  11   0   0   13.15    3.93
  12   0   0    7.78    3.09
  12   0   0   14.69    4.14
  12   0   0   16.44    3.09
  13   0   0   -3.04    3.02
  13   0   0   11.93    3.10
  13   0   0    3.13    4.20
  14   0   0   13.92    3.42
  14   0   0   -0.94    3.29
  14   0   0    8.60    4.67
  15   0   0   -4.54    3.47
  15  -1   0   -4.88    3.70
  14  -1   0    4.04    3.59
  14  -1   0   11.88    4.44
  13  -1   0   21.74    4.87
  13  -1   0   14.23    3.66
  12  -1   0    7.32    2.87
  12  -1   0    1.49    2.98
  12  -1   0    2.52    3.99
  11  -1   0    4.98    2.74
  11  -1   0   -2.34    3.36
  11  -1   0    1.72    2.77
  11  -1   0    4.77    1.43
  10  -1   0   12.48    1.82
  10  -1   0   13.29    2.90
  10  -1   0   11.92    2.83
  10  -1   0   10.08    3.77
   9  -1   0   -0.94    3.15
   9  -1   0    4.63    1.71
   9  -1   0    5.28    2.36
   9  -1   0    3.92    2.34
   8  -1   0    1.64    3.02
   8  -1   0    1.67    2.02
   8  -1   0    3.77    1.54
   8  -1   0    3.32    2.04
   7  -1   0  140.97    4.52
   7  -1   0  137.81    4.55
   7  -1   0  137.67    4.95
   7  -1   0  134.20    3.31
   6  -1   0   25.21    2.95
   6  -1   0   21.22    1.96
   6  -1   0   27.51    2.89
   6  -1   0   28.19    2.92
   5  -1   0   15.29    1.72
   5  -1   0   17.23    1.51
   5  -1   0   20.97    2.49
   5  -1   0   15.89    2.34
   4  -1   0  178.65    3.97
   4  -1   0  182.38    3.37
   4  -1   0  186.44    4.45
   4  -1   0  184.36    4.03
  -4   1   0  176.91    3.48
   3  -1   0   56.56    2.67
   3  -1   0   63.90    2.55
   3  -1   0   55.94    2.00
   3  -1   0   55.46    2.88
  -3   1   0   59.77    2.10
   2  -1   0   69.45    2.08
   2  -1   0   65.20    1.98
   2  -1   0   65.99    1.58
   2  -1   0   68.02    1.98
  -2   1   0   64.92    1.72
   1  -1   0  168.97    2.69
   1  -1   0  164.83    2.52
   1  -1   0  167.89    2.52
   1  -1   0  164.60    2.70
  -1   1   0  163.62    2.56
   0  -1   0   -0.32    0.30
  -1  -1   0    2.91    0.30
   1   1   0    3.22    0.32
   1   1   0    3.46    0.30
   1   1   0    3.03    0.57
   1   1   0    4.07    0.38
   1   1   0    3.72    0.55
  -2  -1   0   40.15    1.08
   2   1   0   39.22    0.98
   2   1   0   43.70    2.07
   2   1   0   39.64    1.86
   2   1   0   38.19    1.11
  -3  -1   0   54.33    1.74
   3   1   0   47.50    2.71
   3   1   0   47.51    1.42
   3   1   0   53.47    1.78
   3   1   0   50.91    1.69
  -4  -1   0   23.16    1.40
   4   1   0   26.03    1.74
   4   1   0   23.11    2.36
   4   1   0   22.34    1.24
   4   1   0   24.16    1.67
  -5  -1   0   96.93    2.44
   5   1   0   98.03    2.16
   5   1   0  100.26    2.86
   5   1   0   97.38    2.95
   5   1   0  100.56    3.75
  -6  -1   0   93.53    2.64
   6   1   0   91.74    3.30
   6   1   0   91.00    4.37
   6   1   0   94.72    3.26
   6   1   0   90.13    2.17
  -7  -1   0   22.36    2.00
   7   1   0   28.60    2.87
   7   1   0   22.75    1.49
   7   1   0   24.76    3.09
   7   1   0   22.93    2.73
  -8  -1   0    2.21    1.52
   8   1   0   -1.89    2.64
   8   1   0    1.09    1.83
   8   1   0    0.49    1.10
   8   1   0    0.67    1.73
   8   1   0   -0.70    1.08
   9   1   0   -1.14    2.00
   9   1   0    0.20    1.01
   9   1   0    2.00    1.09
   9   1   0    2.84    2.22
   9   1   0   -4.25    3.01
  10   1   0    1.58    2.28
  10   1   0    2.24    2.44
  10   1   0    0.54    3.53
  11   1   0    3.84    2.60
  11   1   0    7.97    2.55
  11   1   0    3.87    3.80
  12   1   0   25.11    3.25
  12   1   0   27.24    4.67
  12   1   0   19.98    3.36
  13   1   0   10.55    4.29
  13   1   0    4.95    3.21
  13   1   0   15.74    3.20
  14   1   0    0.44    3.32
  14   1   0    5.01    4.34
  14   1   0   13.91    3.31
  15   1   0    4.26    3.70
  15   1   0    6.61    4.72
  15  -2   0   -1.02    3.86
  14  -2   0   -5.85    3.24
  14  -2   0    0.93    4.03
  13  -2   0   -3.98    3.11
  13  -2   0   -2.40    3.66
  13  -2   0    8.25    3.16
  12  -2   0    8.54    3.21
  12  -2   0   13.51    3.13
  12  -2   0   11.81    1.71
  12  -2   0    6.09    4.19
  11  -2   0    7.26    3.67
  11  -2   0    9.33    1.89
  11  -2   0    9.95    2.95
  11  -2   0    7.30    3.00
  10  -2   0   10.59    2.88
  10  -2   0   10.95    3.74
  10  -2   0   13.07    2.92
  10  -2   0   12.36    2.07
   9  -2   0   -2.10    3.32
   9  -2   0   -1.84    1.88
   9  -2   0    1.50    2.42
   9  -2   0   -0.06    2.35
   8  -2   0   40.11    2.59
   8  -2   0   43.86    4.01
   8  -2   0   45.42    4.02
   8  -2   0   43.27    4.01
   7  -2   0   12.29    2.16
   7  -2   0    9.78    2.10
   7  -2   0   13.54    2.94
   7  -2   0    8.36    1.77
   6  -2   0    1.49    1.75
   6  -2   0    2.38    1.57
   6  -2   0    3.07    2.29
   6  -2   0    3.01    1.72
  -6   2   0    3.86    1.74
   5  -2   0    7.06    1.71
   5  -2   0    7.45    1.53
   5  -2   0    8.53    2.13
   5  -2   0    9.25    1.74
  -5   2   0    9.95    1.70
   4  -2   0   10.97    1.54
   4  -2   0   12.13    1.50
   4  -2   0   11.22    1.84
   4  -2   0    9.73    1.56
  -4   2   0   11.28    1.61
   3  -2   0   34.30    2.76
   3  -2   0   31.93    1.83
   3  -2   0   38.23    2.48
   3  -2   0   31.56    2.19
  -3   2   0   32.69    1.87
   2  -2   0   38.61    1.89
   2  -2   0   39.27    2.37
   2  -2   0   40.64    2.04
   2  -2   0   36.72    1.71
  -2   2   0   40.17    1.23
  -2   2   0   35.07    1.72
   1  -2   0   25.33    0.84
   1  -2   0   25.94    1.33
   1  -2   0   24.97    1.21
   1  -2   0   24.52    1.02
  -1   2   0   25.08    1.09
  -1   2   0   25.82    1.27
   0  -2   0  172.42    2.61
   0   2   0  172.13    2.82
   0   2   0  174.86    2.71
   0   2   0  171.08    2.83
   0   2   0  168.16    2.69
  -1  -2   0  277.56    3.86
   1   2   0  272.75    4.48
   1   2   0  280.92    3.93
   1   2   0  275.73    3.92
   1   2   0  278.11    3.94
   1   2   0  271.37    4.07
  -2  -2   0  102.11    1.88
   2   2   0  107.64    1.77
   2   2   0  103.56    1.81
   2   2   0  112.10    2.96
  -3  -2   0   29.04    1.40
   3   2   0   24.58    1.16
   3   2   0   25.62    1.10
   3   2   0   29.37    2.42
   3   2   0   24.80    1.00
  -4  -2   0    1.49    0.98
   4   2   0    0.75    0.76
   4   2   0   -0.34    1.74
   4   2   0    1.74    0.82
   4   2   0    0.99    0.67
   4   2   0    0.73    0.68
  -5  -2   0   33.59    1.68
   5   2   0   32.89    1.26
   5   2   0   35.10    2.00
   5   2   0   33.55    1.25
   5   2   0   39.00    2.13
   5   2   0   31.25    2.95
  -6  -2   0    4.07    1.33
   6   2   0    5.09    2.35
   6   2   0    4.18    1.30
   6   2   0    4.83    1.39
   6   2   0    5.56    0.90
   6   2   0    5.42    0.87
  -7  -2   0    4.32    1.41
   7   2   0    5.50    1.60
   7   2   0    3.67    2.70
   7   2   0    5.34    0.85
   7   2   0    4.16    0.87
   7   2   0    2.48    1.46
  -8  -2   0   85.07    2.79
   8   2   0   80.70    3.71
   8   2   0   85.62    5.01
   8   2   0   80.98    1.59
   8   2   0   88.35    3.92
   8   2   0   80.08    1.59
  -9  -2   0   12.85    1.91
   9   2   0   10.98    3.71
   9   2   0   14.03    2.24
   9   2   0   13.25    2.35
  10   2   0    0.71    3.83
  10   2   0    6.41    2.52
  10   2   0    3.36    2.21
  11   2   0   22.08    3.12
  11   2   0   23.82    2.92
  11   2   0   30.06    4.75
  12   2   0   13.02    4.09
  12   2   0   15.66    2.96
  12   2   0    9.65    3.02
  13   2   0    7.84    2.82
  13   2   0   -1.18    3.71
  13   2   0   -3.31    2.84
  14   2   0    3.95    4.16
  14   2   0   -3.67    3.17
  14   2   0    8.89    3.12
  15   2   0   -3.20    3.48
  15   2   0    7.46    4.92
  15  -3   0    4.86    4.04
  14  -3   0    6.61    3.98
  13  -3   0    9.17    4.36
  13  -3   0   -1.22    3.27
  12  -3   0    5.24    3.25
  12  -3   0   12.27    2.03
  12  -3   0   13.36    4.25
  12  -3   0   17.28    3.43
  11  -3   0    4.57    2.86
  11  -3   0    3.42    2.04
  11  -3   0   -0.35    2.79
  11  -3   0    0.52    3.47
  10  -3   0    7.27    2.17
  10  -3   0    3.32    3.66
  10  -3   0    4.74    2.80
  10  -3   0    2.95    2.75
   9  -3   0   -0.98    2.08
   9  -3   0    2.16    2.41
   9  -3   0    0.81    2.54
   9  -3   0    2.05    3.13
   8  -3   0   17.56    2.30
   8  -3   0   14.27    2.56
   8  -3   0   18.35    3.41
   8  -3   0   18.36    2.59
  -8   3   0   20.87    2.64
   7  -3   0    3.76    2.40
   7  -3   0    2.29    1.90
   7  -3   0    1.09    1.83
   7  -3   0    2.86    2.06
  -7   3   0    4.28    1.84
   6  -3   0   15.36    2.12
   6  -3   0   16.86    2.04
   6  -3   0   17.29    2.31
   6  -3   0   18.25    2.58
  -6   3   0   20.44    2.28
   5  -3   0   19.59    2.25
   5  -3   0   18.39    1.79
   5  -3   0   17.50    2.44
   5  -3   0   15.53    1.95
  -5   3   0   22.69    2.17
   4  -3   0   56.37    3.03
   4  -3   0   56.86    2.53
   4  -3   0   56.66    2.91
   4  -3   0   54.73    2.37
  -4   3   0   51.77    2.19
   3  -3   0  345.83    5.82
   3  -3   0  332.65    5.66
   3  -3   0  353.88    6.34
   3  -3   0  352.12    6.50
  -3   3   0  334.22    5.80
   2  -3   0    0.81    1.52
   2  -3   0   -1.36    1.55
   2  -3   0   -0.66    1.75
   2  -3   0   -1.71    1.27
  -2   3   0   -4.05    1.75
   1  -3   0    9.99    0.80
   1  -3   0   11.12    1.22
   1  -3   0   11.46    1.22
  -1   3   0   10.64    1.29
  -1   3   0   10.53    1.38
   0  -3   0   -0.02    0.73
   0   3   0    1.43    1.04
   0   3   0   -0.30    0.80
   0   3   0    1.97    0.74
   0   3   0    0.07    0.73
  -1  -3   0  417.33    5.81
   1   3   0  399.42    6.51
   1   3   0  417.86    6.07
   1   3   0  409.64    5.93
   1   3   0  419.90    6.06
  -2  -3   0   13.35    1.20
   2   3   0   15.83    1.87
   2   3   0   11.38    1.31
   2   3   0   15.00    1.46
   2   3   0   13.56    1.03
  -3  -3   0  146.11    2.61
   3   3   0  147.86    3.62
   3   3   0  147.17    2.32
   3   3   0  150.96    2.53
   3   3   0  144.34    2.34
  -4  -3   0   82.38    1.98
   4   3   0   81.03    1.52
   4   3   0   83.00    1.50
   4   3   0   83.44    1.96
   4   3   0   82.75    3.17
  -5  -3   0    9.06    1.27
   5   3   0    7.26    0.66
   5   3   0    8.26    0.67
   5   3   0    7.72    1.18
   5   3   0    8.60    2.27
   5   3   0    5.41    1.05
  -6  -3   0   12.99    1.47
   6   3   0   11.21    1.46
   6   3   0   13.07    0.67
   6   3   0    9.81    1.33
   6   3   0   10.66    0.63
   6   3   0    9.03    2.46
  -7  -3   0    8.10    1.47
   7   3   0    7.34    1.62
   7   3   0    6.63    2.65
   7   3   0    7.19    1.45
  -8  -3   0    2.92    1.49
   8   3   0   -1.44    2.75
   8   3   0    3.82    1.84
   8   3   0    1.24    1.57
  -9  -3   0    8.48    1.83
   9   3   0    8.72    2.24
   9   3   0    4.30    1.93
   9   3   0    3.58    3.22
  10   3   0   13.17    2.43
  10   3   0   10.06    2.50
  10   3   0   11.80    3.84
  11   3   0    5.46    2.65
  11   3   0    6.63    3.87
  11   3   0   10.90    2.49
  12   3   0    0.58    2.43
  12   3   0   -1.01    2.70
  12   3   0   -0.89    3.73
  13   3   0   10.46    2.99
  13   3   0    0.42    2.94
  13   3   0    5.37    4.06
  14   3   0    2.29    4.19
  14   3   0   -3.67    3.16
  15   3   0    6.22    4.59
  15   3   0   -1.54    3.49
  15  -4   0   -1.29    3.98
  14  -4   0   -1.76    3.68
  13  -4   0    4.55    1.92
  13  -4   0    0.19    3.51
  12  -4   0   25.75    4.09
  12  -4   0   37.87    3.00
  12  -4   0   35.76    4.76
  12  -4   0   48.31    5.80
  11  -4   0   39.82    4.64
  11  -4   0   48.95    5.54
  11  -4   0   41.66    3.27
  11  -4   0   44.99    5.48
  10  -4   0   26.76    2.77
  10  -4   0   21.81    3.42
  10  -4   0   26.99    3.56
  10  -4   0   23.82    3.95
   9  -4   0   51.15    4.96
   9  -4   0   48.47    4.84
   9  -4   0   46.41    4.80
   9  -4   0   47.38    3.22
   8  -4   0   27.66    3.35
   8  -4   0   22.20    2.93
   8  -4   0   29.66    2.69
   8  -4   0   18.55    2.76
  -8   4   0   26.13    2.85
   7  -4   0   10.12    2.25
   7  -4   0   14.16    2.66
   7  -4   0   13.36    2.40
   7  -4   0   11.75    2.18
  -7   4   0   15.95    2.33
   6  -4   0   21.89    2.32
   6  -4   0   21.35    2.49
   6  -4   0   22.54    2.77
   6  -4   0   19.79    2.34
  -6   4   0   22.80    2.44
   5  -4   0    2.03    1.84
   5  -4   0    1.38    1.90
   5  -4   0    0.39    2.00
   5  -4   0    1.87    1.99
  -5   4   0    2.65    1.81
   4  -4   0    2.43    1.69
   4  -4   0    0.74    1.49
   4  -4   0    0.97    1.53
   4  -4   0    1.84    1.58
  -4   4   0    1.14    1.62
   3  -4   0  230.64    4.52
   3  -4   0  234.69    4.32
   3  -4   0  231.27    5.33
   3  -4   0  233.62    5.15
  -3   4   0  225.84    4.66
   2  -4   0    4.72    1.79
   2  -4   0    4.05    1.59
  -2   4   0    3.42    2.00
   1  -4   0   32.59    2.44
   1  -4   0   27.03    2.19
  -1   4   0   28.28    2.38
  -1   4   0   36.46    2.93
   0  -4   0   89.37    2.37
   0   4   0   95.40    2.95
   0   4   0   96.75    3.25
   0   4   0   86.11    2.58
  -1  -4   0  201.74    3.64
   1   4   0  211.24    4.55
   1   4   0  204.74    4.15
   1   4   0  205.57    3.99
   1   4   0  199.65    3.70
  -2  -4   0  111.73    2.57
   2   4   0  116.82    2.69
   2   4   0  115.25    3.00
   2   4   0  118.87    2.76
   2   4   0  112.77    2.65
  -3  -4   0   66.23    1.83
   3   4   0   66.05    1.52
   3   4   0   64.96    1.84
   3   4   0   64.21    2.59
   3   4   0   65.54    1.95
  -4  -4   0   37.52    1.58
   4   4   0   33.39    2.60
   4   4   0   35.72    1.04
   4   4   0   34.65    1.60
   4   4   0   36.58    1.09
  -5  -4   0    0.34    1.14
   5   4   0   -1.12    0.93
   5   4   0    0.18    1.12
   5   4   0   -0.52    2.06
   5   4   0    0.73    0.43
  -6  -4   0   89.59    2.48
   6   4   0   90.45    2.97
   6   4   0   89.82    4.06
   6   4   0   94.14    2.83
  -7  -4   0   30.04    1.94
   7   4   0   32.07    3.57
   7   4   0   32.86    2.48
   7   4   0   35.46    2.80
  -8  -4   0   13.34    1.68
   8   4   0    9.69    1.76
   8   4   0   11.91    3.11
   8   4   0   11.73    2.01
  -9  -4   0   26.77    2.30
   9   4   0   29.60    4.00
   9   4   0   36.11    3.93
   9   4   0   29.28    3.37
  10   4   0   12.65    4.09
  10   4   0   15.72    2.59
  10   4   0   11.13    2.29
  11   4   0    5.27    2.31
  11   4   0    1.41    2.46
  11   4   0    1.98    3.95
  12   4   0    0.90    4.02
  12   4   0   -4.30    2.59
  12   4   0    4.62    2.49
  13   4   0   -2.82    2.89
  13   4   0    6.95    2.83
  13   4   0   -1.50    4.08
  14   4   0   -0.33    4.43
  15   4   0   -7.60    3.25
  15   4   0    7.17    4.97
  15  -5   0    4.11    4.29
  14  -5   0    0.67    3.83
  13  -5   0   14.53    4.02
  13  -5   0   19.65    2.54
  12  -5   0   19.17    2.65
  12  -5   0   17.56    4.12
  12  -5   0   17.78    3.94
  11  -5   0    4.83    2.43
  11  -5   0    7.44    3.32
  11  -5   0    4.32    3.47
  11  -5   0    6.52    3.10
  10  -5   0    6.56    3.61
  10  -5   0    5.23    3.00
  10  -5   0    6.18    2.55
  10  -5   0    6.17    3.15
   9  -5   0   -0.64    2.61
   9  -5   0    3.75    2.90
   9  -5   0   -1.90    2.83
   9  -5   0    0.40    2.44
   8  -5   0   12.40    2.92
   8  -5   0    6.92    2.69
   8  -5   0    8.76    2.56
   8  -5   0   10.48    2.53
  -8   5   0   13.56    2.63
   7  -5   0    9.36    2.43
   7  -5   0   10.37    2.37
   7  -5   0    8.58    2.65
   7  -5   0   12.28    2.36
  -7   5   0   10.93    2.21
   6  -5   0  222.60    5.09
   6  -5   0  223.76    6.13
   6  -5   0  224.11    6.26
   6  -5   0  213.47    5.32
  -6   5   0  212.07    5.00
   5  -5   0   -1.21    2.05
   5  -5   0   -0.07    1.75
   5  -5   0    0.19    2.01
   5  -5   0    0.59    1.92
  -5   5   0    0.22    2.21
   4  -5   0  165.56    3.88
   4  -5   0  171.62    4.99
   4  -5   0  167.86    4.18
   4  -5   0  168.43    4.78
  -4   5   0  161.03    4.25
   3  -5   0    4.60    1.80
   3  -5   0    6.30    1.28
   3  -5   0    5.18    1.61
   3  -5   0    6.77    1.69
  -3   5   0    6.24    1.92
   2  -5   0    5.29    1.60
   2  -5   0    5.76    1.79
   2  -5   0    5.45    0.54
  -2   5   0    6.29    1.80
  -2   5   0    4.70    1.98
   1  -5   0   -0.77    1.50
   1  -5   0   -3.30    1.77
  -1   5   0    2.73    1.81
  -1   5   0   -3.46    2.03
   0  -5   0   90.41    2.82
   0   5   0   86.64    2.94
   0   5   0   92.55    3.19
   0   5   0   94.90    3.65
  -1  -5   0   13.55    1.63
   1   5   0   10.79    1.36
   1   5   0   15.05    1.97
   1   5   0   13.30    1.63
  -2  -5   0   14.33    1.43
   2   5   0   15.36    1.75
   2   5   0   13.63    1.59
   2   5   0   12.34    1.25
   2   5   0   16.27    1.95
  -3  -5   0   85.11    2.21
   3   5   0   87.16    2.99
   3   5   0   86.58    2.40
   3   5   0   85.89    2.38
   3   5   0   85.16    1.93
  -4  -5   0  178.87    3.32
   4   5   0  184.88    4.67
   4   5   0  186.01    3.57
   4   5   0  182.73    2.90
   4   5   0  177.50    2.89
  -5  -5   0    0.80    1.22
   5   5   0    0.97    0.46
   5   5   0    1.36    2.13
   5   5   0    0.54    1.01
   5   5   0    0.94    0.47
  -6  -5   0  154.92    3.33
   6   5   0  162.74    3.70
   6   5   0  152.89    5.16
   6   5   0  162.45    3.85
  -7  -5   0   14.30    1.69
   7   5   0   14.37    2.95
   7   5   0   12.17    1.55
   7   5   0   13.43    1.78
  -8  -5   0    0.12    1.42
   8   5   0    0.99    1.82
   8   5   0   -1.31    2.85
   8   5   0   -0.18    1.51
  -9  -5   0   -1.35    1.60
   9   5   0    4.60    2.20
   9   5   0   -2.29    3.20
   9   5   0   -1.11    1.80
  10   5   0    6.19    2.44
  10   5   0    3.25    2.07
  10   5   0    4.76    3.63
  11   5   0    9.59    2.47
  11   5   0    6.16    2.59
  11   5   0   10.48    3.92
  12   5   0   18.41    2.97
  12   5   0    9.55    2.97
  12   5   0   16.43    4.29
  13   5   0    9.23    3.32
  13   5   0   17.41    4.47
  13   5   0   20.79    3.25
  14   5   0   -7.83    3.01
  14   5   0    7.84    3.09
  14   5   0    0.66    4.11
  15   5   0   12.58    3.50
  15   5   0    5.06    4.81
  15  -6   0   -4.82    4.14
  14  -6   0   -2.47    3.74
  13  -6   0    1.01    3.69
  13  -6   0    1.36    2.34
  12  -6   0    1.59    2.49
  12  -6   0    1.47    3.45
  11  -6   0    5.56    2.57
  11  -6   0    2.85    3.16
  10  -6   0    9.47    3.36
  10  -6   0   10.24    3.41
  10  -6   0    7.56    3.18
  10  -6   0    9.09    2.80
   9  -6   0    3.38    3.01
   9  -6   0    0.69    2.84
   9  -6   0    2.44    2.70
   9  -6   0    5.75    3.10
   8  -6   0   11.88    3.05
   8  -6   0    9.60    2.70
   8  -6   0    8.77    2.73
   8  -6   0    8.82    3.03
  -8   6   0   14.86    2.81
   7  -6   0   56.07    3.46
   7  -6   0   57.53    3.26
   7  -6   0   58.18    4.50
   7  -6   0   60.89    4.43
  -7   6   0   57.92    3.47
   6  -6   0    9.35    2.20
   6  -6   0   14.61    2.61
   6  -6   0    9.44    2.10
   6  -6   0   11.02    2.33
  -6   6   0   16.34    2.50
   5  -6   0    2.74    2.08
   5  -6   0    2.38    2.24
   5  -6   0    3.17    1.97
   5  -6   0    3.45    1.70
  -5   6   0    6.55    2.49
   4  -6   0   30.81    3.71
   4  -6   0   26.02    2.51
   4  -6   0   26.71    2.95
  -4   6   0   23.40    2.63
   3  -6   0   81.02    3.46
   3  -6   0   84.23    3.07
  -3   6   0   80.69    3.18
   2  -6   0    6.77    1.79
   2  -6   0    3.85    1.64
  -2   6   0    6.66    2.06
  -2   6   0    4.58    1.80
   1  -6   0  252.76    4.80
   1  -6   0  242.31    5.23
  -1   6   0  245.83    5.57
  -1   6   0  241.84    4.93
   0  -6   0  156.32    3.54
   0   6   0  147.11    3.86
   0   6   0  146.74    3.66
   0   6   0  155.22    4.18
  -1  -6   0   32.80    1.97
   1   6   0   37.88    2.40
   1   6   0   36.15    2.34
   1   6   0   40.40    2.75
  -2  -6   0   54.79    2.13
   2   6   0   60.23    2.63
   2   6   0   54.99    2.34
   2   6   0   59.28    2.48
   2   6   0   56.30    2.15
  -3  -6   0   17.03    1.71
   3   6   0   18.74    1.90
   3   6   0   19.08    1.46
   3   6   0   18.10    1.85
   3   6   0   16.81    1.79
  -4  -6   0   11.87    1.44
   4   6   0   13.27    1.82
   4   6   0   11.88    1.06
   4   6   0   10.96    2.03
   4   6   0   10.67    1.29
  -5  -6   0   15.46    1.54
   5   6   0   12.34    0.87
   5   6   0   11.25    0.87
   5   6   0   12.23    2.34
   5   6   0   10.93    1.34
  -6  -6   0   30.36    1.93
   6   6   0   26.53    2.19
   6   6   0   30.38    2.64
   6   6   0   28.18    3.12
  -7  -6   0    0.32    1.42
   7   6   0   -0.04    1.31
   7   6   0   -0.70    2.44
   7   6   0    2.66    1.68
  -8  -6   0   23.86    2.29
   8   6   0   27.11    2.92
   8   6   0   31.27    3.55
   8   6   0   29.18    3.70
   9   6   0   81.09    4.49
   9   6   0   75.57    5.13
   9   6   0   74.14    3.99
  10   6   0    0.74    1.99
  10   6   0    0.37    2.30
  10   6   0    2.16    3.44
  11   6   0    5.11    3.69
  11   6   0    3.75    2.29
  11   6   0    1.06    2.56
  12   6   0    0.04    2.68
  12   6   0    6.83    4.00
  12   6   0    3.39    2.47
  13   6   0    5.97    2.75
  13   6   0   -2.57    2.84
  13   6   0    0.12    3.95
  14   6   0    9.21    3.09
  14   6   0    4.86    4.34
  15   6   0   15.07    3.61
  15   6   0    4.54    4.61
  15   6   0   -2.10    3.45
  14  -7   0    3.64    4.19
  14  -7   0    7.79    2.59
  13  -7   0    0.51    3.77
  13  -7   0    1.36    2.52
  12  -7   0    5.91    2.85
  12  -7   0   -1.76    3.36
  11  -7   0    8.18    2.79
  11  -7   0    3.59    3.48
  10  -7   0    0.23    2.64
  10  -7   0    1.48    3.30
  10  -7   0   -3.42    2.90
   9  -7   0   10.06    3.26
   9  -7   0   10.07    3.26
   9  -7   0   16.72    3.28
   8  -7   0   12.98    3.22
   8  -7   0   10.22    2.78
   8  -7   0   10.63    2.70
   8  -7   0    7.64    2.69
  -8   7   0   11.20    3.09
   7  -7   0   14.04    2.66
   7  -7   0   18.34    3.04
   7  -7   0   18.78    2.74
   7  -7   0   15.29    2.76
  -7   7   0   19.56    3.12
   6  -7   0   40.85    3.12
   6  -7   0   45.26    4.02
   6  -7   0   43.64    3.96
  -6   7   0   44.00    3.11
   5  -7   0   45.07    3.78
   5  -7   0   45.90    3.86
   5  -7   0   37.64    3.01
  -5   7   0   43.39    3.08
   4  -7   0  118.25    4.18
   4  -7   0  110.80    4.37
  -4   7   0  104.23    3.88
   3  -7   0    0.95    1.93
   3  -7   0    0.77    1.67
  -3   7   0    0.43    2.17
   2  -7   0    9.94    1.81
   2  -7   0    8.75    1.98
  -2   7   0    9.10    1.99
  -2   7   0   10.97    2.29
   1  -7   0    6.70    1.87
   1  -7   0    6.16    1.55
  -1   7   0    7.08    2.18
  -1   7   0    6.70    1.84
   0  -7   0   23.45    2.19
   0   7   0   23.26    2.51
   0   7   0   24.43    2.30
   0   7   0   25.09    2.91
  -1  -7   0   36.81    2.34
   1   7   0   38.31    2.27
   1   7   0   38.32    2.88
   1   7   0   36.57    2.59
  -2  -7   0   89.82    2.58
   2   7   0   91.28    3.19
   2   7   0   90.14    2.63
   2   7   0   92.29    3.02
   2   7   0   93.60    3.28
  -3  -7   0    9.92    1.53
   3   7   0    9.23    1.79
   3   7   0    9.16    1.86
   3   7   0    8.06    1.41
  -4  -7   0   43.79    2.21
   4   7   0   44.49    1.70
   4   7   0   44.51    2.50
   4   7   0   44.24    3.04
   4   7   0   47.39    2.55
  -5  -7   0   45.21    2.13
   5   7   0   48.04    1.36
   5   7   0   48.59    1.40
   5   7   0   46.97    2.52
   5   7   0   44.41    3.06
  -6  -7   0    5.23    1.47
   6   7   0    3.77    1.33
   6   7   0    1.62    2.46
  -7  -7   0    3.67    1.51
   7   7   0    2.05    2.54
   7   7   0    5.68    1.88
   7   7   0    3.99    1.47
  -8  -7   0   -0.34    1.62
   8   7   0   -0.18    1.60
   8   7   0    3.10    2.90
   8   7   0    0.12    1.99
   9   7   0    0.29    3.14
   9   7   0   -0.84    1.81
   9   7   0    2.35    2.28
  10   7   0    1.58    2.42
  10   7   0    2.08    3.43
  10   7   0    3.93    2.04
  11   7   0   12.18    2.88
  11   7   0   15.46    4.11
  11   7   0   14.14    2.59
  12   7   0    2.75    2.85
  12   7   0    8.14    4.04
  12   7   0    7.71    2.64
  13   7   0   -0.03    2.64
  13   7   0    1.01    3.90
  13   7   0   -4.58    2.84
  14   7   0    3.79    4.25
  14   7   0   10.97    3.23
  14   7   0    0.18    3.32
  14  -8   0    7.63    2.80
  14  -8   0   -1.80    4.19
  13  -8   0    2.34    2.72
  13  -8   0   -0.60    3.78
  12  -8   0    6.80    3.82
  12  -8   0    7.82    2.93
  11  -8   0   13.49    3.15
  11  -8   0   11.49    3.64
  10  -8   0    2.37    3.12
  10  -8   0    3.87    2.95
   9  -8   0   90.83    4.89
   9  -8   0   88.50    6.20
   9  -8   0   89.30    6.06
   8  -8   0   17.56    3.41
   8  -8   0   15.88    3.13
   8  -8   0   18.16    3.45
  -8   8   0   25.82    3.67
   7  -8   0    0.74    2.41
   7  -8   0    1.31    2.74
   7  -8   0    1.02    2.58
  -7   8   0    2.19    2.93
   6  -8   0   -0.33    2.09
   6  -8   0   -1.10    2.61
   6  -8   0   -0.67    2.41
  -6   8   0    3.05    2.50
   5  -8   0   26.35    3.35
   5  -8   0   38.97    4.12
   5  -8   0   29.92    3.07
  -5   8   0   35.43    3.13
   4  -8   0    4.36    1.99
   4  -8   0    7.99    2.40
  -4   8   0    4.51    2.51
   3  -8   0    7.54    2.04
   3  -8   0    5.17    2.34
  -3   8   0    6.19    2.59
   2  -8   0    9.88    1.99
   2  -8   0   13.79    2.31
  -2   8   0    8.36    2.19
  -2   8   0   11.64    2.59
   1  -8   0    4.66    1.93
  -1   8   0    3.48    2.48
  -1   8   0    4.01    1.94
   0  -8   0   32.63    2.45
   0   8   0   31.40    2.89
   0   8   0   31.75    3.32
   0   8   0   27.32    2.55
  -1  -8   0   64.99    2.61
   1   8   0   74.99    3.35
   1   8   0   70.68    3.20
   1   8   0   72.69    3.45
  -2  -8   0   -0.80    1.47
   2   8   0    0.29    1.34
   2   8   0   -0.18    1.31
   2   8   0   -0.87    2.02
  -3  -8   0   17.53    1.87
   3   8   0   20.57    2.04
   3   8   0   16.49    1.80
   3   8   0   20.34    2.34
  -4  -8   0   44.69    2.26
   4   8   0   44.27    2.98
   4   8   0   44.15    1.84
   4   8   0   45.56    2.69
   4   8   0   45.28    2.69
  -5  -8   0   25.04    2.09
   5   8   0   25.27    2.45
   5   8   0   26.99    2.39
   5   8   0   27.58    1.37
   5   8   0   28.18    2.77
   5   8   0   25.61    1.35
  -6  -8   0   21.35    1.88
   6   8   0   25.10    3.09
   6   8   0   19.75    2.53
  -7  -8   0   79.11    2.81
   7   8   0   78.80    4.33
   7   8   0   86.75    4.04
   7   8   0   86.62    3.53
  -8  -8   0    0.95    1.72
   8   8   0    0.77    1.70
   8   8   0    3.05    2.20
   8   8   0    3.08    3.03
   9   8   0    0.44    2.33
   9   8   0    2.24    3.23
   9   8   0   -0.38    1.84
  10   8   0    8.49    2.59
  10   8   0    9.21    3.65
  10   8   0   11.19    2.28
  11   8   0    6.72    2.80
  11   8   0    8.01    2.44
  11   8   0    8.09    3.80
  12   8   0    4.07    2.48
  12   8   0   -6.04    2.68
  12   8   0   -1.83    3.69
  13   8   0    1.10    3.87
  13   8   0    4.13    2.70
  13   8   0   -0.73    2.94
  14   8   0    2.96    3.04
  14   8   0   -1.15    3.18
  14   8   0    6.86    4.38
  14  -9   0   -1.00    4.08
  14  -9   0    4.68    2.98
  13  -9   0   14.43    3.27
  13  -9   0   12.82    4.29
  12  -9   0    0.16    3.73
  12  -9   0    1.97    3.01
  11  -9   0   -1.98    3.02
  11  -9   0    0.11    3.33
  10  -9   0   -1.39    2.99
  10  -9   0   -1.23    3.07
   9  -9   0   24.70    3.75
   9  -9   0   21.64    3.80
   8  -9   0    4.01    3.37
   8  -9   0    1.35    2.90
   8  -9   0    5.00    3.09
  -8   9   0    7.37    3.37
   7  -9   0    8.80    2.88
   7  -9   0    1.29    2.52
   7  -9   0    2.48    2.81
  -7   9   0    3.35    3.27
   6  -9   0   74.87    4.52
   6  -9   0   76.91    4.93
   6  -9   0   73.65    5.15
  -6   9   0   75.50    4.46
   5  -9   0   37.55    3.87
   5  -9   0   42.83    3.43
  -5   9   0   44.44    3.89
   4  -9   0    9.66    2.60
   4  -9   0   10.96    2.27
  -4   9   0   15.63    2.91
   3  -9   0   30.50    3.57
   3  -9   0   31.83    3.16
  -3   9   0   28.98    3.18
   2  -9   0    2.43    1.97
   2  -9   0    2.13    2.31
  -2   9   0    1.63    2.66
   1  -9   0    4.93    2.24
  -1   9   0    6.58    2.59
  -1   9   0    3.78    2.17
   0  -9   0   28.62    2.64
   0   9   0   35.31    3.64
   0   9   0   37.01    3.02
   0   9   0   34.99    3.32
  -1  -9   0   13.01    2.04
   1   9   0   15.63    2.11
   1   9   0   16.08    2.49
  -2  -9   0   -0.32    1.63
   2   9   0   -1.08    1.32
   2   9   0   -0.62    1.58
   2   9   0   -2.30    2.24
  -3  -9   0  200.39    4.37
   3   9   0  192.44    4.40
   3   9   0  209.14    5.15
   3   9   0  194.85    4.66
  -4  -9   0   13.09    1.83
   4   9   0   14.37    2.16
   4   9   0   10.54    1.72
   4   9   0   14.54    1.50
   4   9   0   13.71    2.30
  -5  -9   0    4.80    1.61
   5   9   0    2.39    1.47
   5   9   0    5.01    1.11
   5   9   0    2.99    2.18
   5   9   0    1.82    2.06
  -6  -9   0   14.52    1.92
   6   9   0   11.64    1.81
   6   9   0   13.45    0.91
   6   9   0   14.80    0.88
   6   9   0   12.08    2.59
  -7  -9   0    2.94    1.75
   7   9   0    1.89    2.64
   7   9   0    3.45    1.72
   7   9   0    3.03    2.16
   8   9   0    1.26    2.96
   8   9   0    1.90    1.85
   8   9   0    2.88    2.33
   9   9   0   17.77    2.69
   9   9   0   19.65    2.43
   9   9   0   18.51    3.68
  10   9   0    3.10    2.06
  10   9   0   -0.56    2.45
  10   9   0    3.67    3.36
  11   9   0    3.95    2.72
  11   9   0    3.96    2.30
  11   9   0    3.14    3.61
  12   9   0    7.38    3.08
  12   9   0   14.53    2.85
  12   9   0   13.79    4.18
  13   9   0    7.03    3.27
  13   9   0    8.87    2.96
  13   9   0    8.23    4.18
  14   9   0    6.48    4.42
  14   9   0   -2.85    3.16
  14   9   0    7.51    3.15
  14 -10   0   -1.31    4.35
  14 -10   0    4.61    3.20
  13 -10   0    7.46    3.36
  13 -10   0    7.37    4.22
  12 -10   0    8.81    3.35
  12 -10   0    3.13    3.89
  11 -10   0    3.84    3.31
  11 -10   0   -0.86    3.40
  10 -10   0   26.03    3.87
  10 -10   0   23.59    4.13
   9 -10   0    3.13    3.05
   9 -10   0    4.75    3.09
   8 -10   0   -1.11    3.09
   8 -10   0    1.92    2.83
  -8  10   0    3.74    3.12
   7 -10   0   10.48    3.21
   7 -10   0    8.58    2.96
  -7  10   0   15.15    3.79
   6 -10   0    3.50    2.42
   6 -10   0    3.14    3.17
  -6  10   0    2.63    3.33
   5 -10   0    0.69    2.65
   5 -10   0   -1.26    2.12
  -5  10   0    0.87    2.78
   4 -10   0   23.13    2.88
   4 -10   0   27.95    3.10
  -4  10   0   33.23    3.78
   3 -10   0   66.24    3.93
   3 -10   0   64.97    3.75
  -3  10   0   64.22    3.80
   2 -10   0    1.69    1.97
   2 -10   0   -1.18    2.25
  -2  10   0   -2.19    2.51
   1 -10   0  143.23    4.41
  -1  10   0  139.12    4.58
   0 -10   0  105.01    4.02
   0  10   0  104.49    4.20
   0  10   0   99.89    3.93
  -1 -10   0   15.24    2.21
   1  10   0   12.87    2.10
   1  10   0   13.03    2.59
   1  10   0   13.93    1.30
  -2 -10   0   27.12    2.51
   2  10   0   24.38    1.97
   2  10   0   28.47    3.09
   2  10   0   27.04    3.02
  -3 -10   0    4.06    1.66
   3  10   0    3.25    1.61
   3  10   0    2.20    1.66
   3  10   0    5.65    2.37
  -4 -10   0   63.32    2.97
   4  10   0   65.42    3.13
   4  10   0   70.54    3.51
   4  10   0   66.09    3.22
  -5 -10   0   21.28    2.12
   5  10   0   16.87    2.03
   5  10   0   20.09    2.62
   5  10   0   17.84    1.51
   5  10   0   21.97    2.70
  -6 -10   0   39.21    2.51
   6  10   0   43.98    3.32
   6  10   0   43.28    1.46
   6  10   0   42.12    3.79
   6  10   0   43.25    1.40
  -7 -10   0   30.90    2.74
   7  10   0   35.15    3.80
   7  10   0   29.34    3.34
   8  10   0   52.03    3.86
   8  10   0   49.88    4.82
   8  10   0   51.61    4.50
   9  10   0   32.56    4.42
   9  10   0   31.54    4.22
   9  10   0   27.57    3.70
  10  10   0    7.39    2.26
  10  10   0    7.47    3.80
  10  10   0    5.94    2.75
  11  10   0    4.37    2.34
  11  10   0    5.20    4.05
  11  10   0    3.00    2.82
  12  10   0    1.16    2.41
  12  10   0   -2.70    2.90
  12  10   0    3.25    4.10
  13  10   0    5.44    2.81
  13  10   0   -4.55    3.09
  13  10   0    4.91    4.45
  14  10   0    3.24    4.64
  14  10   0   -3.81    3.19
  14  10   0    5.62    3.12
  14 -11   0    3.83    4.59
  14 -11   0    9.45    3.51
  13 -11   0    5.80    4.53
  13 -11   0    6.93    3.32
  12 -11   0    1.20    3.75
  12 -11   0    5.00    3.39
  11 -11   0    1.49    3.52
  11 -11   0    5.25    3.49
  10 -11   0   -1.15    3.31
  10 -11   0    2.47    3.16
   9 -11   0    7.50    3.28
   9 -11   0    2.73    3.12
   8 -11   0   13.31    3.61
   8 -11   0   14.39    3.47
  -8  11   0   16.45    3.70
   7 -11   0   21.04    3.44
   7 -11   0   24.90    3.79
  -7  11   0   22.67    4.23
   6 -11   0    7.15    2.83
   6 -11   0    6.24    3.19
  -6  11   0   12.41    3.80
   5 -11   0   48.69    4.57
   5 -11   0   55.24    4.21
  -5  11   0   58.70    4.21
   4 -11   0   71.90    4.21
   4 -11   0   73.71    4.66
  -4  11   0   69.16    4.20
   3 -11   0    0.61    2.00
   3 -11   0    1.67    2.66
  -3  11   0   -1.43    2.74
   2 -11   0   58.48    3.74
   2 -11   0   56.17    3.67
  -2  11   0   53.56    3.73
   1 -11   0    0.74    2.31
  -1  11   0    2.74    2.90
   0 -11   0   11.99    2.33
   0  11   0    9.54    2.18
   0  11   0   10.88    2.81
  -1 -11   0   39.44    2.86
   1  11   0   38.38    1.76
   1  11   0   41.46    3.18
   1  11   0   42.74    3.43
  -2 -11   0   76.58    3.22
   2  11   0   79.12    2.63
   2  11   0   88.37    4.13
   2  11   0   78.59    3.56
  -3 -11   0   41.65    2.60
   3  11   0   41.21    3.30
   3  11   0   38.87    2.55
   3  11   0   43.61    3.37
  -4 -11   0    8.21    2.00
   4  11   0    6.80    1.98
   4  11   0    8.85    2.58
   4  11   0    6.73    1.94
  -5 -11   0   46.10    2.83
   5  11   0   50.49    3.48
   5  11   0   53.24    3.59
   5  11   0   51.71    3.44
   5  11   0   46.70    2.22
  -6 -11   0   16.04    2.24
   6  11   0   15.65    1.49
   6  11   0   17.92    2.85
   6  11   0   18.66    2.98
   6  11   0   14.86    2.18
   6  11   0   18.25    1.34
  -7 -11   0    1.14    1.97
   7  11   0   -0.74    1.85
   7  11   0   -0.31    2.64
   8  11   0    2.97    2.57
   8  11   0    2.97    2.98
   8  11   0    1.27    1.95
   9  11   0    3.14    2.05
   9  11   0    2.90    3.12
   9  11   0    0.27    2.59
  10  11   0   -0.65    3.28
  10  11   0    2.18    2.19
  10  11   0   -0.23    2.61
  11  11   0    6.18    2.49
  11  11   0    4.28    2.92
  11  11   0    6.34    3.73
  12  11   0    6.81    3.29
  12  11   0   13.84    4.19
  12  11   0   14.31    2.98
  13  11   0    3.04    2.83
  13  11   0    1.20    4.01
  13  11   0   -4.30    3.20
  14  11   0   -4.22    3.45
  14  11   0   10.66    3.32
  13 -12   0   -1.43    3.43
  13 -12   0    1.51    4.84
  12 -12   0   13.97    4.01
  12 -12   0    9.77    4.44
  11 -12   0   22.85    4.66
  11 -12   0   26.57    4.22
  10 -12   0    1.40    3.50
  10 -12   0    0.07    3.72
   9 -12   0   16.77    4.07
   9 -12   0   14.51    3.72
   8 -12   0   12.25    3.47
   8 -12   0   16.43    3.80
  -8  12   0   11.44    3.68
   7 -12   0    2.12    2.94
   7 -12   0    3.30    3.50
  -7  12   0    3.90    3.46
   6 -12   0   -2.74    3.26
   6 -12   0    1.01    2.82
  -6  12   0   -0.50    3.37
   5 -12   0   15.04    3.47
   5 -12   0   13.65    2.93
  -5  12   0   14.74    3.63
   4 -12   0   24.18    3.14
   4 -12   0   28.87    3.62
  -4  12   0   28.01    3.92
   3 -12   0   27.43    3.09
   3 -12   0   29.09    3.39
  -3  12   0   34.40    4.12
   2 -12   0   40.31    3.61
  -2  12   0   42.08    3.72
   1 -12   0   78.18    3.83
  -1  12   0   72.58    4.08
   0 -12   0   17.20    2.63
   0  12   0   19.63    2.61
   0  12   0   16.53    1.08
   0  12   0   17.79    3.17
  -1 -12   0    2.26    2.11
   1  12   0    0.48    1.00
   1  12   0   -0.97    1.78
   1  12   0    2.07    2.67
  -2 -12   0    2.47    2.24
   2  12   0    1.24    1.30
   2  12   0   -0.01    1.91
   2  12   0    1.79    2.81
  -3 -12   0    4.96    2.01
   3  12   0    9.43    2.94
   3  12   0    8.86    1.75
   3  12   0    4.66    1.94
  -4 -12   0    5.40    2.14
   4  12   0    4.47    2.01
   4  12   0    9.21    2.80
   4  12   0    6.58    2.00
  -5 -12   0   15.15    2.41
   5  12   0   14.73    2.58
   5  12   0   11.49    2.23
   5  12   0   12.83    1.68
   5  12   0   11.60    3.02
  -6 -12   0    1.72    2.06
   6  12   0    1.99    2.74
   6  12   0    0.14    2.00
   6  12   0    2.28    1.23
   6  12   0    2.69    2.52
  -7 -12   0   24.44    2.62
   7  12   0   21.98    3.21
   7  12   0   20.34    2.57
   8  12   0   35.58    4.70
   8  12   0   40.04    3.96
   8  12   0   37.11    4.05
   9  12   0    9.70    3.61
   9  12   0    8.29    2.92
   9  12   0    7.12    2.29
  10  12   0    4.10    2.32
  10  12   0    3.45    3.67
  10  12   0   -0.56    2.75
  11  12   0   -0.41    2.96
  11  12   0    3.67    3.88
  11  12   0    2.11    2.45
  12  12   0    1.58    2.62
  12  12   0   -2.79    2.99
  12  12   0   -1.56    3.92
  13  12   0   -4.15    3.33
  13  12   0    2.24    2.90
  13  12   0    7.94    4.12
  13 -13   0    7.55    3.84
  12 -13   0    1.16    3.84
  11 -13   0    0.37    5.72
  11 -13   0    1.34    3.96
  10 -13   0    0.75    3.55
  10 -13   0    3.43    3.88
   9 -13   0   25.86    4.49
   9 -13   0   14.57    3.92
   8 -13   0    2.23    3.51
   8 -13   0    1.52    3.05
  -8  13   0    8.58    3.71
   7 -13   0   12.26    3.80
   7 -13   0    7.95    3.18
  -7  13   0    8.27    3.85
   6 -13   0   20.59    3.64
   6 -13   0   29.25    4.23
  -6  13   0   27.77    4.50
   5 -13   0   12.84    4.00
   5 -13   0   11.99    3.09
  -5  13   0   14.15    4.29
   4 -13   0    2.33    3.15
   4 -13   0    4.44    2.54
  -4  13   0    2.72    3.32
   3 -13   0    1.95    2.99
   3 -13   0    3.17    2.26
  -3  13   0    6.11    3.42
   2 -13   0    0.66    2.66
  -2  13   0    1.07    3.05
   1 -13   0    1.56    2.60
  -1  13   0    6.48    3.20
   0 -13   0   28.29    3.07
   0  13   0   27.25    3.46
   0  13   0   26.92    3.61
   0  13   0   24.54    1.04
  -1 -13   0   38.57    3.20
   1  13   0   37.35    1.75
   1  13   0   35.76    3.53
   1  13   0   35.08    3.58
  -2 -13   0    2.55    2.18
   2  13   0    1.96    1.33
   2  13   0    1.83    2.06
   2  13   0    0.91    3.16
  -3 -13   0   18.17    2.74
   3  13   0   16.77    2.59
   3  13   0   19.43    3.15
   3  13   0   20.35    2.08
  -4 -13   0   34.00    3.24
   4  13   0   29.38    3.65
   4  13   0   30.10    2.95
   4  13   0   31.34    3.49
  -5 -13   0   10.97    2.46
   5  13   0   16.99    3.26
   5  13   0   12.09    2.57
   5  13   0    9.07    2.34
   5  13   0    7.67    1.76
  -6 -13   0    8.34    2.50
   6  13   0    8.19    3.03
   6  13   0    7.68    1.52
   6  13   0    5.19    2.68
   6  13   0    5.05    2.26
   7  13   0    0.55    0.63
   7  13   0   -2.51    2.04
   7  13   0   -1.24    2.62
   8  13   0   10.39    2.44
   8  13   0    6.76    3.27
   8  13   0    2.31    2.79
   9  13   0    3.45    3.39
   9  13   0    1.82    2.86
   9  13   0    0.20    2.18
  10  13   0   12.28    3.23
  10  13   0   14.89    2.79
  10  13   0   18.22    3.87
  11  13   0    6.01    2.60
  11  13   0    0.03    3.09
  11  13   0    2.71    3.58
  12  13   0    4.35    3.84
  12  13   0    2.26    2.67
  12  13   0   -3.96    3.15
  13  13   0   -3.43    3.47
  13  13   0    6.69    3.08
  13  13   0    6.69    4.17
  13 -14   0   10.86    4.12
  12 -14   0   14.86    4.42
  11 -14   0    3.28    3.73
  10 -14   0    8.35    3.78
   9 -14   0   21.33    4.62
   8 -14   0    1.70    3.65
  -8  14   0   -1.59    3.46
   7 -14   0    9.50    3.70
   7 -14   0    7.09    3.74
  -7  14   0   13.42    4.15
   6 -14   0    9.74    3.19
   6 -14   0   17.77    4.07
  -6  14   0   16.12    4.20
   5 -14   0    0.49    3.47
   5 -14   0    1.50    2.71
  -5  14   0    0.81    3.66
   4 -14   0   26.72    3.95
   4 -14   0   18.90    3.19
  -4  14   0   25.95    4.27
   3 -14   0   55.92    4.89
   3 -14   0   57.12    4.58
  -3  14   0   59.81    4.69
   2 -14   0    2.44    3.00
  -2  14   0    2.89    3.47
   1 -14   0    5.31    2.87
  -1  14   0    3.88    3.28
   0 -14   0   51.51    3.80
   0  14   0   50.09    1.16
   0  14   0   48.36    4.10
   0  14   0   48.67    4.31
  -1 -14   0   30.68    3.21
   1  14   0   25.89    1.61
   1  14   0   23.89    2.94
   1  14   0   28.88    3.75
  -2 -14   0    0.19    2.37
   2  14   0    0.13    1.34
   2  14   0   -2.48    3.21
   2  14   0    0.74    2.26
  -3 -14   0   17.29    2.72
   3  14   0   15.46    2.75
   3  14   0   16.39    2.06
   3  14   0   14.92    3.60
  -4 -14   0   21.49    2.91
   4  14   0   19.62    2.45
   4  14   0   21.10    3.66
   4  14   0   16.10    2.77
  -5 -14   0    0.79    2.51
   5  14   0    2.76    1.81
   5  14   0    1.94    2.28
   5  14   0   -0.47    2.23
   5  14   0    1.96    3.30
  -6 -14   0   35.59    3.18
   6  14   0   34.60    3.71
   6  14   0   24.16    3.04
   6  14   0   33.52    3.68
   6  14   0   28.71    2.24
   7  14   0   39.69    1.46
   7  14   0   39.85    4.25
   7  14   0   39.19    3.67
   8  14   0    2.86    3.08
   8  14   0    0.22    2.89
   8  14   0    0.56    2.27
   9  14   0   11.22    3.55
   9  14   0    7.41    2.52
   9  14   0    5.40    3.14
  10  14   0    6.61    2.61
  10  14   0    6.52    3.37
  10  14   0    4.94    3.16
  11  14   0    2.95    3.76
  11  14   0    1.51    2.55
  11  14   0   -2.65    3.03
  12  14   0    4.49    4.12
  12  14   0   -3.09    3.30
  12  14   0    1.12    2.74
  13  14   0   -5.83    3.48
  13  14   0    3.54    3.01
  13  14   0   10.81    4.77
  12 -15   0    5.71    3.85
  11 -15   0    2.17    3.87
  10 -15   0    3.55    3.92
   9 -15   0    5.71    4.31
   8 -15   0   -0.95    3.81
  -8  15   0    3.93    3.90
   7 -15   0   85.36    5.68
  -7  15   0   62.87    5.18
   6 -15   0   29.67    4.36
  -6  15   0   29.27    4.46
   5 -15   0   13.37    4.06
  -5  15   0    6.41    4.05
   4 -15   0   33.43    4.38
  -4  15   0   32.09    4.77
   3 -15   0   -0.16    3.31
  -3  15   0    1.10    3.56
   2 -15   0   -0.33    3.20
  -2  15   0    1.50    3.66
   1 -15   0    4.73    3.40
  -1  15   0   10.97    3.77
   0 -15   0   21.03    3.30
   0  15   0   20.06    3.19
   0  15   0   23.96    4.33
  -1 -15   0    0.50    2.73
   1  15   0    0.97    2.41
   1  15   0    1.63    0.98
   1  15   0    2.89    3.50
  -2 -15   0   43.24    3.70
   2  15   0   43.19    2.30
   2  15   0   41.65    4.37
   2  15   0   42.23    4.20
  -3 -15   0   20.65    3.26
   3  15   0   22.56    2.50
   3  15   0   21.05    3.10
   3  15   0   19.68    3.57
  -4 -15   0    0.57    2.39
   4  15   0    0.58    2.41
   4  15   0    0.70    1.96
   4  15   0    1.07    3.45
  -5 -15   0   13.31    2.95
   5  15   0   15.10    2.59
   5  15   0   12.05    3.48
   5  15   0   11.58    2.73
   5  15   0   12.49    2.17
  -6 -15   0   18.79    2.94
   6  15   0   13.49    1.88
   6  15   0   11.77    2.71
   6  15   0   16.31    3.57
   6  15   0   12.91    2.83
   7  15   0    3.82    2.49
   7  15   0    8.07    2.83
   7  15   0    4.93    1.15
   8  15   0    8.04    3.21
   8  15   0    2.09    3.11
   8  15   0    5.04    2.54
   9  15   0    6.68    3.36
   9  15   0    3.40    3.19
   9  15   0    5.35    2.54
  10  15   0   -0.86    3.27
  10  15   0    6.62    3.42
  10  15   0    6.86    2.71
  11  15   0   12.76    4.17
  11  15   0    1.55    3.34
  11  15   0    8.91    2.93
  12  15   0    5.29    3.70
  12  15   0   14.69    3.34
  12  15   0   16.73    4.73
  12 -16   0   -0.04    4.41
  11 -16   0    3.05    4.70
  10 -16   0    5.06    4.12
   9 -16   0    1.35    3.99
   8 -16   0    5.88    4.16
  -8  16   0    9.68    4.11
   7 -16   0    3.70    3.98
  -7  16   0    6.29    4.05
   6 -16   0    6.31    4.39
  -6  16   0   10.84    4.68
   5 -16   0    5.61    3.93
  -5  16   0    4.54    4.01
   4 -16   0   55.29    5.20
  -4  16   0   45.75    5.00
   3 -16   0   -0.25    3.44
  -3  16   0   -4.11    3.73
   2 -16   0    9.49    3.57
  -2  16   0    5.36    4.46
   1 -16   0   45.95    4.24
  -1  16   0   43.24    4.77
   0 -16   0    9.47    3.67
   0  16   0    9.59    3.91
  -1 -16   0    8.77    3.14
   1  16   0    8.72    2.94
   1  16   0    7.52    3.89
   1  16   0   11.65    1.31
  -2 -16   0    0.57    2.79
   2  16   0    1.88    2.53
   2  16   0    1.23    1.31
   2  16   0   -2.37    3.43
  -3 -16   0    3.39    3.04
   3  16   0    3.43    1.69
   3  16   0   -3.31    3.65
   3  16   0    1.71    2.59
  -4 -16   0    5.98    2.99
   4  16   0   -0.92    2.98
   4  16   0    2.08    2.48
   4  16   0    0.50    1.90
  -5 -16   0   17.46    3.17
   5  16   0   15.91    2.55
   5  16   0   11.58    3.63
   5  16   0   10.27    2.83
  -6 -16   0    2.84    2.63
   6  16   0    5.62    2.56
   6  16   0    2.64    3.34
   6  16   0    3.20    2.55
   6  16   0    2.33    1.79
   7  16   0    3.93    2.80
   7  16   0   -0.56    2.31
   7  16   0    1.09    1.24
   8  16   0   14.10    3.57
   8  16   0   16.80    3.11
   8  16   0   19.77    3.45
   9  16   0    1.17    3.25
   9  16   0    4.70    2.70
   9  16   0    9.72    3.54
  10  16   0    2.96    2.70
  10  16   0   -0.08    3.43
  10  16   0    1.86    3.25
  11  16   0    4.70    3.97
  11  16   0   -4.67    3.28
  11  16   0    2.52    2.80
  12  16   0    4.54    3.05
  12  16   0   -5.59    3.55
  12  16   0    4.46    4.18
  11 -17   0   -2.45    4.60
  10 -17   0    5.18    4.27
   9 -17   0    9.83    4.34
   8 -17   0   16.11    4.49
  -8  17   0   19.32    4.63
   7 -17   0   16.98    4.43
  -7  17   0   19.63    4.61
   6 -17   0   18.86    4.34
  -6  17   0   20.89    4.73
   5 -17   0   16.73    4.22
  -5  17   0   14.90    4.92
   4 -17   0    5.82    3.78
  -4  17   0    8.58    4.54
   3 -17   0   -0.28    3.63
  -3  17   0    0.42    3.91
   2 -17   0   -2.18    3.35
  -2  17   0   -0.12    3.84
   1 -17   0   -0.45    3.37
  -1  17   0    0.84    3.89
   0 -17   0   -0.03    3.20
   0  17   0   -1.26    3.83
  -1 -17   0    9.31    3.34
   1  17   0    5.49    3.90
  -2 -17   0    1.99    3.23
   2  17   0    1.89    1.30
   2  17   0   -2.10    3.61
  -3 -17   0   12.42    3.08
   3  17   0   12.44    4.16
   3  17   0   14.16    1.91
   3  17   0    8.41    2.93
  -4 -17   0   29.33    3.36
   4  17   0   29.65    3.69
   4  17   0   34.07    4.55
   4  17   0   35.57    2.98
  -5 -17   0    0.07    2.83
   5  17   0    2.56    2.17
   5  17   0    0.83    2.53
   5  17   0   -0.39    3.36
   6  17   0   -1.56    3.41
   6  17   0    3.66    2.49
   6  17   0    1.76    2.54
   6  17   0    0.38    1.83
   7  17   0    7.10    2.79
   7  17   0    3.05    3.39
   7  17   0    2.03    2.59
   8  17   0    3.64    2.67
   8  17   0   -1.00    3.32
   8  17   0    3.30    3.07
   9  17   0   -1.05    3.43
   9  17   0    4.18    3.30
   9  17   0    2.27    2.77
  10  17   0   10.02    3.11
  10  17   0    3.66    3.74
  10  17   0   13.87    3.82
  11  17   0    6.97    3.09
  11  17   0    8.58    4.06
  11  17   0   -1.26    3.72
  11 -18   0   -2.23    4.74
  10 -18   0    7.63    4.99
   9 -18   0    0.02    4.29
   8 -18   0   -0.31    4.25
  -8  18   0    5.21    4.31
   7 -18   0    2.09    4.09
  -7  18   0    2.83    4.12
   6 -18   0    2.31    4.11
  -6  18   0    1.60    4.19
   5 -18   0   -1.23    3.75
  -5  18   0    1.66    4.19
   4 -18   0    2.60    3.75
  -4  18   0    3.37    4.21
   3 -18   0   38.36    4.68
  -3  18   0   42.13    5.15
   2 -18   0   11.51    3.92
  -2  18   0    9.29    4.25
   1 -18   0   11.42    3.75
  -1  18   0   13.15    4.22
   0 -18   0    4.22    3.39
   0  18   0    5.33    4.07
  -1 -18   0   23.10    3.74
   1  18   0   27.57    4.55
  -2 -18   0    4.13    3.32
   2  18   0    2.63    3.63
  -3 -18   0    3.96    2.95
   3  18   0    4.57    3.54
  -4 -18   0   14.06    3.41
   4  18   0   11.76    2.13
   4  18   0   12.18    3.66
  -5 -18   0    8.12    2.89
   5  18   0    5.97    4.41
   5  18   0    8.27    4.02
   5  18   0   10.49    2.41
   6  18   0    3.23    2.81
   6  18   0    5.25    3.72
   6  18   0    6.43    2.58
   6  18   0    4.15    2.07
   7  18   0   17.56    4.05
   7  18   0   18.63    3.39
   7  18   0   20.41    3.26
   8  18   0    3.51    2.81
   8  18   0   -1.37    3.54
   8  18   0    6.60    3.13
   9  18   0    1.46    3.10
   9  18   0    2.87    2.83
   9  18   0    3.05    3.75
  10  18   0    5.80    3.77
  10  18   0    9.43    3.94
  10  18   0    1.22    3.82
  11  18   0    6.94    3.90
  11  18   0   -1.06    3.76
  10 -19   0   17.56    5.59
   9 -19   0    7.70    5.27
   8 -19   0    2.13    4.46
  -8  19   0    0.51    4.27
   7 -19   0   28.03    5.62
  -7  19   0   28.17    5.68
   6 -19   0   11.53    4.75
  -6  19   0   13.12    4.75
   5 -19   0    0.49    4.14
  -5  19   0   -1.33    4.31
   4 -19   0    5.25    4.15
  -4  19   0    5.70    4.37
   3 -19   0    5.39    3.84
  -3  19   0    6.56    4.78
   2 -19   0   -1.95    3.61
  -2  19   0   -0.94    3.90
   1 -19   0    6.32    4.09
  -1  19   0    7.36    4.66
   0 -19   0   45.81    4.78
   0  19   0   44.77    5.08
  -1 -19   0   43.03    4.31
   1  19   0   47.49    5.60
  -2 -19   0   24.84    4.00
   2  19   0   20.97    4.37
  -3 -19   0   37.41    4.22
   3  19   0   34.32    4.66
  -4 -19   0    9.56    3.48
   4  19   0    2.74    4.04
  -5 -19   0    2.32    3.27
   5  19   0   -0.97    3.75
   6  19   0   -0.73    1.96
   6  19   0    2.71    2.45
   6  19   0    3.30    3.81
   7  19   0   -2.06    3.75
   7  19   0    4.62    2.78
   8  19   0   -2.31    3.75
   8  19   0    5.35    2.99
   9  19   0   12.90    3.67
   9  19   0    3.74    3.98
  10  19   0   12.30    3.74
  10  19   0   -3.38    3.86
  10 -20   0   20.10    5.72
   9 -20   0    0.91    5.30
   8 -20   0   -1.97    5.12
  -8  20   0    4.90    5.33
   7 -20   0    2.43    4.54
  -7  20   0    5.73    4.84
   6 -20   0    3.14    4.50
  -6  20   0   -2.60    4.26
   5 -20   0   12.68    4.69
  -5  20   0   11.65    4.94
   4 -20   0   31.21    5.07
  -4  20   0   31.85    5.36
   3 -20   0   16.53    4.39
  -3  20   0   17.09    4.96
   2 -20   0    0.68    4.25
  -2  20   0    2.17    4.26
   1 -20   0   18.63    4.13
  -1  20   0   20.94    4.84
   0 -20   0    3.48    3.60
   0  20   0   -0.03    4.68
  -1 -20   0    6.00    3.40
   1  20   0    9.17    4.71
  -2 -20   0    0.65    3.21
   2  20   0    5.79    4.16
  -3 -20   0    7.02    3.70
   3  20   0    9.11    4.18
  -4 -20   0    2.95    3.08
   4  20   0    4.54    4.27
  -5 -20   0   19.54    4.13
   5  20   0   22.20    4.74
   6  20   0    2.86    2.23
   6  20   0    2.41    4.14
   7  20   0    1.19    3.97
   8  20   0    2.86    3.54
   8  20   0   -5.19    3.83
   9  20   0   -1.93    4.03
   9  20   0    8.84    3.52
   9 -21   0    4.55    5.51
   8 -21   0    5.83    5.51
  -8  21   0   16.76    5.90
   7 -21   0    7.02    4.99
  -7  21   0    9.32    5.08
   6 -21   0    1.06    5.14
  -6  21   0    5.36    5.30
   5 -21   0   11.48    4.77
  -5  21   0   14.02    5.49
   4 -21   0   -1.85    4.58
  -4  21   0   -2.76    4.90
   3 -21   0    4.64    4.24
  -3  21   0   -1.57    4.50
   2 -21   0    4.47    3.98
  -2  21   0    3.28    4.51
   1 -21   0    3.92    4.01
  -1  21   0    1.91    4.45
   0 -21   0    4.27    4.14
   0  21   0    1.14    4.76
  -1 -21   0   15.29    4.25
   1  21   0   15.10    5.04
  -2 -21   0   34.56    4.31
   2  21   0   41.35    5.33
  -3 -21   0   -2.15    3.61
   3  21   0   -1.72    3.80
  -4 -21   0    1.50    3.30
   4  21   0    3.15    4.45
   5  21   0    4.18    4.24
   6  21   0   -2.98    4.22
   6  21   0    0.11    2.26
   7  21   0    2.85    4.15
   8  21   0    0.38    4.37
   9  21   0   -5.72    4.11
   8 -22   0    8.58    5.12
  -8  22   0   -4.53    5.53
   7 -22   0    4.54    5.00
  -7  22   0    4.45    5.08
   6 -22   0   -0.35    4.59
  -6  22   0    0.49    4.92
   5 -22   0   14.93    4.84
  -5  22   0   12.74    5.23
   4 -22   0   -0.40    4.31
  -4  22   0    0.17    4.81
   3 -22   0    7.39    4.34
  -3  22   0   11.90    4.93
   2 -22   0   29.53    4.94
  -2  22   0   30.93    5.62
   1 -22   0    5.87    4.10
  -1  22   0    7.55    5.24
   0 -22   0    3.80    3.79
   0  22   0    7.46    4.57
  -1 -22   0   10.53    4.31
   1  22   0    5.74    4.52
  -2 -22   0    0.72    3.48
   2  22   0   -0.81    4.21
  -3 -22   0    2.07    3.85
   3  22   0    3.01    4.31
  -4 -22   0    2.12    3.70
   4  22   0    3.54    4.08
   5  22   0    1.68    4.50
   6  22   0    6.25    2.53
   6  22   0    3.05    4.67
   7  22   0   14.52    4.70
   7  22   0   13.92    4.97
   8  22   0   -1.52    4.46
   7 -23   0    4.61    5.12
  -7  23   0    6.73    5.23
   6 -23   0   13.29    5.37
  -6  23   0   16.32    5.72
   5 -23   0    0.00    4.75
  -5  23   0    8.15    5.38
   4 -23   0    3.00    4.59
  -4  23   0    3.34    5.09
   3 -23   0    0.11    4.71
  -3  23   0    0.73    4.85
   2 -23   0    8.09    4.27
  -2  23   0   12.08    5.61
   1 -23   0    7.49    4.61
  -1  23   0    3.85    5.21
   0 -23   0    9.94    4.16
   0  23   0    8.87    4.90
  -1 -23   0    7.99    4.00
   1  23   0   11.32    4.81
  -2 -23   0   -3.08    3.57
   2  23   0   11.06    4.66
  -3 -23   0    3.20    4.11
   3  23   0    5.71    4.44
  -4 -23   0    6.92    4.23
   4  23   0    6.97    4.57
   5  23   0   -1.20    4.67
   6  23   0    0.77    4.77
   7  23   0   -2.77    4.76
   6 -24   0    0.92    5.08
  -6  24   0   10.81    5.50
   5 -24   0    3.41    4.97
  -5  24   0    0.08    5.18
   4 -24   0   16.92    5.24
  -4  24   0   18.52    6.38
   3 -24   0   11.51    4.85
  -3  24   0   15.63    5.62
   2 -24   0    2.33    4.32
  -2  24   0    0.75    4.90
   1 -24   0    4.52    4.27
  -1  24   0    6.02    4.98
   0 -24   0   -0.69    3.99
   0  24   0    5.71    5.51
  -1 -24   0    0.20    3.94
   1  24   0   -1.56    4.56
  -2 -24   0    5.98    4.03
   2  24   0    8.89    5.45
  -3 -24   0   -1.87    4.17
   3  24   0   -1.03    4.66
   4  24   0   -1.61    4.43
   5  24   0    5.59    5.19
   4 -25   0    0.11    4.73
  -4  25   0    4.29    5.33
   3 -25   0    7.25    4.93
  -3  25   0    2.31    5.24
   2 -25   0   -1.79    4.51
  -2  25   0    3.29    5.21
   1 -25   0    9.06    4.79
  -1  25   0   13.91    5.51
   0 -25   0    5.72    4.90
   0  25   0    9.22    5.83
  -1 -25   0    4.31    4.30
   1  25   0    6.57    5.62
  -2 -25   0   10.84    4.42
   2  25   0    9.41    5.75
  -3 -25   0    5.99    4.55
   3  25   0   -7.60    4.60
   4  25   0    5.99    4.81
   1 -26   0   -1.63    4.45
  -1  26   0    4.02    6.02
   0 -26   0    1.63    4.43
   0  26   0   -1.17    5.08
  -1 -26   0    0.28    4.86
   1  26  -1    3.28    5.10
  -1 -26   1   -0.50    4.49
   0  26  -1    3.39    5.86
   0 -26   1    8.31    4.67
  -1  26  -1    1.84    5.30
   1 -26   1   11.10    5.06
   4  25  -1   19.13    5.89
   3  25  -1    5.01    5.62
  -3 -25   1    8.46    4.81
   2  25  -1    6.38    5.02
  -2 -25   1   -3.47    4.05
   1  25  -1   16.24    5.49
  -1 -25   1   18.82    4.81
   0  25  -1    1.18    5.54
   0 -25   1   10.94    4.61
  -1  25  -1   -0.79    5.07
   1 -25   1    3.23    4.43
  -2  25  -1    3.93    5.28
   2 -25   1    3.84    4.63
  -3  25  -1    4.73    5.37
   3 -25   1   -0.60    4.72
  -4  25  -1    6.35    6.05
   4 -25   1    4.87    4.93
   6  24  -1   -5.89    4.97
   6  24  -1   -2.70    4.60
   5  24  -1   14.60    4.85
   4  24  -1   -0.64    5.03
  -4 -24   1    4.24    4.79
   3  24  -1    3.08    5.19
  -3 -24   1    3.50    4.38
   2  24  -1    5.40    4.75
  -2 -24   1    0.24    3.96
   1  24  -1   -4.29    4.59
  -1 -24   1    1.93    4.03
   0  24  -1   -1.74    4.69
   0 -24   1    0.63    4.21
  -1  24  -1    5.34    5.01
   1 -24   1    8.03    4.98
  -2  24  -1   18.16    5.96
   2 -24   1   17.71    5.32
  -3  24  -1    6.04    5.26
   3 -24   1    0.27    4.32
  -4  24  -1    2.78    5.12
   4 -24   1    2.84    4.76
  -5  24  -1    3.83    5.38
   5 -24   1    1.99    4.97
  -6  24  -1    3.50    5.53
   6 -24   1   -0.41    5.11
   7  23  -1   -5.08    4.77
   6  23  -1   -2.68    4.59
   6  23  -1   -5.21    4.70
   6  23  -1    0.08    2.65
   5  23  -1    0.45    4.87
   4  23  -1    9.80    5.02
  -4 -23   1    7.91    4.23
   3  23  -1   -1.27    4.73
  -3 -23   1    5.55    4.21
   2  23  -1   12.98    4.91
  -2 -23   1   18.00    4.27
   1  23  -1    7.24    4.87
  -1 -23   1   16.41    4.57
   0  23  -1    2.72    4.61
   0 -23   1   -1.15    3.91
  -1  23  -1    5.71    5.18
   1 -23   1    3.24    3.98
  -2  23  -1   -0.87    4.45
   2 -23   1    4.17    4.23
  -3  23  -1    4.51    5.38
   3 -23   1    1.52    4.27
  -4  23  -1    6.59    5.12
   4 -23   1    7.92    4.78
  -5  23  -1    3.01    5.24
   5 -23   1    7.91    4.76
  -6  23  -1   -3.68    5.03
   6 -23   1   -0.43    4.79
  -7  23  -1   16.18    5.73
   7 -23   1   15.66    5.55
   8  22  -1   -0.04    4.55
   7  22  -1    1.71    4.55
   6  22  -1    7.68    4.55
   6  22  -1    5.66    2.62
   5  22  -1    8.19    4.81
   4  22  -1    0.95    4.12
  -4 -22   1    3.32    3.85
   3  22  -1   -4.32    4.14
  -3 -22   1    0.60    3.98
   2  22  -1   -3.28    4.15
  -2 -22   1    1.67    3.58
   1  22  -1    2.34    4.49
  -1 -22   1    5.38    4.21
   0  22  -1   18.46    4.94
   0 -22   1   11.75    4.05
  -1  22  -1   38.86    5.58
   1 -22   1   40.58    5.06
  -2  22  -1    0.36    4.48
   2 -22   1    6.67    4.31
  -3  22  -1   16.89    5.04
   3 -22   1   22.03    4.81
  -4  22  -1    8.40    4.96
   4 -22   1    4.95    4.45
  -5  22  -1    2.31    5.31
   5 -22   1    4.35    5.08
  -6  22  -1    2.91    5.45
   6 -22   1    2.72    4.61
  -7  22  -1   -0.54    5.14
   7 -22   1    2.59    4.99
   8 -22   1    4.50    5.56
   9  21  -1    2.65    4.55
   8  21  -1   -4.88    4.12
   7  21  -1   -2.56    4.17
   6  21  -1   -0.16    2.32
   6  21  -1   -2.85    4.17
   5  21  -1    2.42    4.20
  -5 -21   1   -0.93    4.14
   4  21  -1   15.13    4.73
  -4 -21   1    9.86    3.62
   3  21  -1   15.53    4.42
  -3 -21   1   12.92    4.06
   2  21  -1   -1.17    4.01
  -2 -21   1    3.50    3.48
   1  21  -1    6.14    4.43
  -1 -21   1    9.14    4.12
   0  21  -1   18.02    4.84
   0 -21   1   18.87    4.51
  -1  21  -1   -0.15    4.26
   1 -21   1   -4.86    3.74
  -2  21  -1    3.25    4.57
   2 -21   1    3.88    4.13
  -3  21  -1    0.14    4.53
   3 -21   1    2.95    4.21
  -4  21  -1   12.55    5.43
   4 -21   1   13.25    4.91
  -5  21  -1    2.42    4.44
   5 -21   1   -0.94    4.23
  -6  21  -1   34.57    6.28
   6 -21   1   32.35    5.82
  -7  21  -1    3.20    4.94
   7 -21   1    9.28    4.87
  -8  21  -1    5.56    8.04
   8 -21   1    0.62    5.28
   9 -21   1   11.23    5.78
   9  20  -1    8.41    3.54
   9  20  -1   -1.05    4.20
   8  20  -1    4.86    3.16
   8  20  -1   -0.78    4.10
   7  20  -1   19.53    5.02
   7  20  -1    9.09    4.39
   6  20  -1   -1.25    3.85
   6  20  -1    1.42    2.28
   5  20  -1    9.41    4.40
  -5 -20   1    7.35    3.56
   4  20  -1    5.29    4.46
  -4 -20   1    1.16    3.49
   3  20  -1    1.74    3.91
  -3 -20   1    0.27    3.17
   2  20  -1   -0.40    4.04
  -2 -20   1    3.54    3.43
   1  20  -1   11.33    4.33
  -1 -20   1   15.43    4.21
   0  20  -1    0.26    4.11
   0 -20   1    2.65    3.94
  -1  20  -1    0.80    4.19
   1 -20   1    0.66    3.66
  -2  20  -1   36.17    5.41
   2 -20   1   37.61    4.74
  -3  20  -1   23.72    5.13
   3 -20   1   22.05    4.55
  -4  20  -1    2.51    4.97
   4 -20   1   -3.13    3.92
  -5  20  -1    5.02    4.57
   5 -20   1    5.22    4.46
  -6  20  -1    6.28    4.49
   6 -20   1   -3.45    4.18
  -7  20  -1    0.62    4.55
   7 -20   1    6.48    4.54
  -8  20  -1    1.95    5.30
   8 -20   1    5.27    5.19
   9 -20   1    1.21    5.12
  10 -20   1    8.80    5.35
  10  19  -1    8.43    3.69
  10  19  -1   -6.21    4.00
   9  19  -1    5.90    3.50
   9  19  -1   -3.66    3.82
   8  19  -1    7.98    3.19
   8  19  -1   -1.97    3.80
   7  19  -1   -1.15    1.95
   7  19  -1    3.15    2.77
   7  19  -1   -0.96    3.71
   6  19  -1    5.77    2.56
   6  19  -1    0.23    2.17
   6  19  -1    0.17    3.85
   5  19  -1   14.43    2.54
   5  19  -1   10.13    4.19
  -5 -19   1   13.98    3.57
   4  19  -1    9.75    3.87
  -4 -19   1   11.43    3.60
   3  19  -1    7.06    4.43
  -3 -19   1    9.76    3.36
   2  19  -1   18.10    4.79
  -2 -19   1   15.13    3.55
   1  19  -1    8.62    4.11
  -1 -19   1    8.32    3.85
   0  19  -1   15.64    4.98
   0 -19   1   16.12    4.05
  -1  19  -1    5.17    4.27
   1 -19   1    1.88    3.53
  -2  19  -1    2.23    4.19
   2 -19   1    1.43    3.56
  -3  19  -1    2.91    4.26
   3 -19   1    2.03    3.82
  -4  19  -1   19.55    4.89
   4 -19   1   11.73    4.36
  -5  19  -1   18.37    4.96
   5 -19   1   13.59    4.71
  -6  19  -1    1.88    4.38
   6 -19   1   -2.01    4.18
  -7  19  -1    2.21    4.83
   7 -19   1    6.50    4.38
  -8  19  -1   21.48    5.56
   8 -19   1   15.06    5.27
   9 -19   1    3.93    4.96
  10 -19   1    1.18    4.48
  11  18  -1    7.55    4.10
  11  18  -1   -1.04    3.83
  10  18  -1    1.82    3.67
  10  18  -1   -2.84    3.89
   9  18  -1   15.44    3.70
   9  18  -1   11.05    4.05
   8  18  -1   23.90    5.62
   8  18  -1   12.70    4.00
   8  18  -1   23.63    3.65
   7  18  -1    6.83    2.86
   7  18  -1    0.23    1.68
   7  18  -1    2.01    4.60
   7  18  -1    0.54    3.68
   6  18  -1   13.59    2.82
   6  18  -1    7.89    3.85
   6  18  -1   12.32    2.34
   5  18  -1   14.72    2.58
   5  18  -1    9.66    3.96
  -5 -18   1    8.58    3.38
   4  18  -1    2.94    1.94
   4  18  -1   -1.07    4.02
  -4 -18   1   -1.05    2.76
   3  18  -1    2.88    3.92
   3  18  -1    4.27    1.69
  -3 -18   1    7.33    3.39
   2  18  -1   -2.42    3.98
  -2 -18   1    5.23    3.09
   1  18  -1    1.09    3.80
  -1 -18   1   -1.74    3.50
   0  18  -1   10.19    4.59
   0 -18   1    7.91    3.43
  -1  18  -1   44.48    5.06
   1 -18   1   45.02    4.75
  -2  18  -1   31.62    5.33
   2 -18   1   28.75    4.29
  -3  18  -1   16.56    4.55
   3 -18   1   18.17    4.09
  -4  18  -1    7.87    4.34
   4 -18   1    9.14    4.17
  -5  18  -1    1.45    4.27
   5 -18   1    1.87    4.06
  -6  18  -1    3.59    4.30
   6 -18   1    5.06    4.34
  -7  18  -1    8.34    4.88
   7 -18   1    6.40    4.34
  -8  18  -1   16.10    5.33
   8 -18   1    9.71    4.91
   9 -18   1    2.18    4.78
  10 -18   1   15.14    4.71
  11 -18   1   17.83    5.29
  11  17  -1    2.88    3.11
  11  17  -1   -2.43    3.70
  11  17  -1    3.43    3.86
  10  17  -1    6.64    3.04
  10  17  -1    8.90    3.92
  10  17  -1    8.29    3.96
   9  17  -1   -3.17    3.46
   9  17  -1    2.31    2.78
   9  17  -1    3.17    3.27
   8  17  -1    2.67    2.93
   8  17  -1   -0.67    3.40
   8  17  -1    0.05    2.55
   7  17  -1    2.18    1.60
   7  17  -1    1.58    2.61
   7  17  -1    2.82    2.82
   6  17  -1   -1.51    3.62
   6  17  -1    9.09    2.69
   6  17  -1    4.54    2.09
   6  17  -1    4.73    2.73
  -6 -17   1    6.05    3.04
   5  17  -1   33.42    4.43
   5  17  -1   29.68    3.65
   5  17  -1   31.61    3.39
  -5 -17   1   35.49    3.74
   4  17  -1   31.90    3.83
   4  17  -1   36.90    4.25
   4  17  -1   32.80    2.97
  -4 -17   1   39.06    3.88
   3  17  -1   46.96    2.88
   3  17  -1   49.04    4.49
   3  17  -1   46.15    5.07
  -3 -17   1   48.16    4.11
   2  17  -1   16.67    1.76
   2  17  -1   17.91    4.41
  -2 -17   1   15.57    3.64
   1  17  -1   32.12    4.63
  -1 -17   1   33.14    4.22
   0  17  -1   -5.60    4.18
   0 -17   1    2.63    3.21
  -1  17  -1    1.97    3.94
   1 -17   1    1.97    3.32
  -2  17  -1    8.72    4.06
   2 -17   1    8.95    3.77
  -3  17  -1   10.40    4.56
   3 -17   1    7.69    3.82
  -4  17  -1   37.01    4.96
   4 -17   1   39.41    4.77
  -5  17  -1    0.47    4.02
   5 -17   1    0.11    3.84
  -6  17  -1   17.15    4.53
   6 -17   1    9.46    4.27
  -7  17  -1   16.31    4.93
   7 -17   1   17.49    4.92
  -8  17  -1    2.21    4.58
   8 -17   1   -2.17    4.54
   9 -17   1    3.74    4.70
  10 -17   1    0.84    4.10
  11 -17   1    1.69    4.61
  12  16  -1    1.03    2.99
  12  16  -1    0.13    3.74
  12  16  -1    3.04    3.95
  11  16  -1    1.81    2.90
  11  16  -1    3.27    3.76
  11  16  -1   -1.78    3.53
  10  16  -1   16.30    4.05
  10  16  -1   15.72    3.21
  10  16  -1   10.12    3.73
   9  16  -1    3.64    3.42
   9  16  -1    8.50    2.86
   9  16  -1    9.84    3.53
   8  16  -1    5.01    3.05
   8  16  -1    0.72    2.57
   8  16  -1   -0.25    3.32
   7  16  -1   19.40    3.11
   7  16  -1   22.15    3.27
   7  16  -1   21.34    1.90
   6  16  -1   32.58    3.40
   6  16  -1   23.57    3.29
   6  16  -1   26.06    3.97
   6  16  -1   25.14    2.39
  -6 -16   1   27.25    3.31
   5  16  -1    4.81    2.35
   5  16  -1   10.61    3.74
   5  16  -1    2.84    2.55
  -5 -16   1    4.77    2.87
   4  16  -1    0.14    2.04
   4  16  -1    1.32    3.62
   4  16  -1    0.18    2.63
  -4 -16   1   -2.07    2.93
   3  16  -1    3.66    2.75
   3  16  -1    2.70    3.82
   3  16  -1    6.49    1.88
  -3 -16   1    1.84    2.71
   2  16  -1    7.34    2.81
   2  16  -1   11.97    1.70
   2  16  -1    4.89    3.71
  -2 -16   1   11.98    3.39
   1  16  -1    0.08    1.14
   1  16  -1    1.35    2.94
   1  16  -1    2.73    3.66
  -1 -16   1   -0.64    2.86
   0  16  -1   60.24    5.56
   0  16  -1   46.59    1.63
   0 -16   1   51.87    4.40
  -1  16  -1    2.91    3.89
   1 -16   1   -0.24    3.58
  -2  16  -1   39.43    4.78
   2 -16   1   30.69    4.17
  -3  16  -1   62.43    5.05
   3 -16   1   60.11    5.16
  -4  16  -1    6.12    4.05
   4 -16   1    5.22    3.80
  -5  16  -1    4.63    3.98
   5 -16   1    3.52    3.76
  -6  16  -1    6.82    4.06
   6 -16   1    7.89    3.98
  -7  16  -1    7.82    4.39
   7 -16   1   -0.39    4.28
  -8  16  -1    4.45    4.35
   8 -16   1    2.64    4.43
   9 -16   1   16.93    4.36
  10 -16   1   18.32    4.46
  11 -16   1    3.94    3.92
  12 -16   1   10.77    4.22
  12  15  -1    5.10    3.97
  12  15  -1   -3.23    3.55
  12  15  -1    4.28    3.02
  11  15  -1   -1.73    3.34
  11  15  -1    6.20    2.93
  11  15  -1    6.44    3.87
  10  15  -1    2.80    3.40
  10  15  -1   13.92    3.93
  10  15  -1    8.02    2.85
   9  15  -1    3.16    2.55
   9  15  -1   -0.49    3.20
   9  15  -1    6.66    3.44
   8  15  -1   -0.81    2.37
   8  15  -1   -0.05    3.17
   8  15  -1   -2.48    2.91
   7  15  -1    6.92    1.53
   7  15  -1    6.49    2.60
   7  15  -1    4.25    2.87
   6  15  -1   -1.01    3.16
   6  15  -1    0.01    1.69
   6  15  -1    0.36    2.47
   6  15  -1    0.87    2.38
  -6 -15   1   -2.07    2.49
   5  15  -1   -1.45    2.26
   5  15  -1    1.74    1.99
   5  15  -1   -1.82    2.26
   5  15  -1    2.40    3.34
  -5 -15   1    2.23    2.76
   4  15  -1   32.72    4.45
   4  15  -1   38.87    4.34
   4  15  -1   28.46    3.09
  -4 -15   1   32.96    3.51
   3  15  -1   24.26    2.31
   3  15  -1   19.21    3.03
   3  15  -1   20.46    3.72
  -3 -15   1   21.63    3.10
   2  15  -1   21.86    3.24
   2  15  -1   21.95    3.75
   2  15  -1   20.44    2.21
  -2 -15   1   23.43    3.17
   1  15  -1   47.75    2.07
   1  15  -1   48.17    4.65
   1  15  -1   47.81    4.40
  -1 -15   1   56.35    4.02
   0  15  -1    3.84    0.92
   0  15  -1    7.45    3.98
   0  15  -1    3.39    2.53
   0 -15   1    3.75    2.91
  -1  15  -1   -2.69    3.35
   1 -15   1   -0.96    2.92
  -2  15  -1    0.27    3.52
   2 -15   1    4.53    3.33
  -3  15  -1   45.11    4.68
   3 -15   1   46.99    4.46
  -4  15  -1   -1.68    3.75
   4 -15   1    1.11    3.51
  -5  15  -1   14.17    4.17
   5 -15   1   15.80    3.96
  -6  15  -1   34.38    4.70
   6 -15   1   30.21    4.45
  -7  15  -1    8.88    4.28
   7 -15   1   11.03    3.79
  -8  15  -1   12.93    4.52
   8 -15   1   18.64    4.61
   9 -15   1    7.94    3.97
  10 -15   1    4.91    4.40
  11 -15   1    4.40    4.19
  12 -15   1   -0.18    4.17
  13  14  -1    1.44    4.45
  13  14  -1   -6.72    3.61
  13  14  -1    2.39    3.12
  12  14  -1   -1.88    3.42
  12  14  -1    5.13    2.94
  12  14  -1    7.41    4.30
  11  14  -1   -2.95    3.20
  11  14  -1    1.35    2.61
  11  14  -1    6.96    4.02
  10  14  -1    6.12    3.30
  10  14  -1    7.26    2.67
  10  14  -1    5.47    3.66
   9  14  -1    5.42    3.18
   9  14  -1    1.68    2.42
   9  14  -1    3.96    3.40
   8  14  -1   47.73    4.67
   8  14  -1   39.78    5.34
   8  14  -1   45.48    4.65
   7  14  -1    1.94    1.31
   7  14  -1    0.68    2.91
   7  14  -1    2.07    2.27
  -7 -14   1    3.80    3.69
   6  14  -1    3.21    3.14
   6  14  -1    1.45    2.66
   6  14  -1    1.87    2.37
   6  14  -1    3.53    1.75
  -6 -14   1    3.91    2.62
   5  14  -1    2.58    3.26
   5  14  -1    0.76    2.22
   5  14  -1    2.24    1.98
   5  14  -1    0.91    2.36
  -5 -14   1    2.06    2.56
   4  14  -1   -0.20    3.26
   4  14  -1    1.22    2.20
   4  14  -1    2.36    2.08
  -4 -14   1    0.61    2.57
   3  14  -1    0.67    2.19
   3  14  -1    1.51    3.34
   3  14  -1    2.99    1.75
  -3 -14   1    1.65    2.66
   2  14  -1   13.76    1.77
   2  14  -1   11.52    3.58
   2  14  -1   10.79    2.56
  -2 -14   1   19.18    3.03
   1  14  -1   15.37    2.83
   1  14  -1   10.91    3.40
   1  14  -1   14.18    1.50
  -1 -14   1   10.87    2.80
   0  14  -1   -0.32    3.15
   0  14  -1    2.29    2.22
   0 -14   1    2.27    2.99
  -1  14  -1   31.88    4.34
   1 -14   1   22.93    3.29
  -2  14  -1   41.26    4.22
   2 -14   1   38.48    3.87
  -3  14  -1    8.53    3.68
   3 -14   1    4.27    3.28
   3 -14   1    3.24    2.45
  -4  14  -1    5.23    3.59
   4 -14   1    2.21    2.62
   4 -14   1    2.86    3.32
  -5  14  -1    0.60    3.97
   5 -14   1    0.29    2.66
   5 -14   1   -1.71    3.36
  -6  14  -1   -0.83    3.62
   6 -14   1   -1.54    2.82
   6 -14   1    4.64    3.71
  -7  14  -1   20.77    4.52
   7 -14   1   17.44    3.92
   7 -14   1   14.00    3.57
  -8  14  -1   48.33    5.15
   8 -14   1   49.24    4.77
   8 -14   1   47.41    6.03
   9 -14   1    8.09    3.89
   9 -14   1    1.82    5.54
  10 -14   1    8.69    4.17
  11 -14   1   11.61    4.25
  12 -14   1    5.06    3.81
  13 -14   1    1.30    3.76
  13  13  -1   11.54    4.67
  13  13  -1    8.46    3.21
  13  13  -1    2.81    3.70
  12  13  -1    8.36    3.59
  12  13  -1    9.34    4.40
  12  13  -1   10.63    3.10
  11  13  -1    4.63    3.88
  11  13  -1    4.34    2.61
  11  13  -1   -1.78    3.16
  10  13  -1    3.22    2.47
  10  13  -1    1.73    3.01
  10  13  -1    0.63    3.62
   9  13  -1   -2.34    2.88
   9  13  -1   -0.57    2.21
   9  13  -1   -2.09    3.26
   8  13  -1    1.07    2.16
   8  13  -1    0.32    3.12
   8  13  -1    1.08    2.85
   7  13  -1   -0.11    2.82
   7  13  -1    0.75    1.12
   7  13  -1    3.89    2.32
   7  13  -1   -3.39    2.85
  -7 -13   1   -0.97    2.22
   6  13  -1    3.29    2.69
   6  13  -1    4.17    2.98
   6  13  -1    5.77    2.36
   6  13  -1    5.82    1.67
  -6 -13   1    3.07    2.34
   5  13  -1    6.49    3.11
   5  13  -1    8.88    2.48
   5  13  -1    9.81    1.92
   5  13  -1    9.64    2.49
  -5 -13   1    9.61    2.60
   4  13  -1   -1.16    1.94
   4  13  -1    0.36    2.00
   4  13  -1    1.29    2.94
  -4 -13   1    0.23    2.35
   3  13  -1   44.02    3.94
   3  13  -1   42.40    2.74
   3  13  -1   41.93    4.00
  -3 -13   1   43.97    3.14
   2  13  -1   29.96    2.24
   2  13  -1   32.72    3.83
   2  13  -1   35.21    3.64
  -2 -13   1   30.99    2.91
   1  13  -1    3.49    3.26
   1  13  -1    1.88    2.15
  -1 -13   1   -1.75    2.20
   0  13  -1    4.34    2.18
   0  13  -1    4.69    3.00
   0 -13   1    4.23    2.80
  -1  13  -1   15.70    3.67
   1 -13   1   19.12    2.98
  -2  13  -1    2.29    3.15
   2 -13   1    0.09    2.82
  -3  13  -1    4.91    3.40
   3 -13   1    6.41    2.40
   3 -13   1    8.50    3.18
  -4  13  -1   45.08    4.73
   4 -13   1   36.27    4.45
   4 -13   1   40.00    4.18
  -5  13  -1   14.59    4.12
   5 -13   1    9.08    2.94
   5 -13   1   11.74    3.43
  -6  13  -1    7.23    3.73
   6 -13   1    0.54    2.73
   6 -13   1    0.71    3.52
  -7  13  -1   47.19    5.07
   7 -13   1   46.25    4.49
   7 -13   1   45.82    5.61
  -8  13  -1    6.04    3.44
   8 -13   1   -0.18    3.33
   8 -13   1    0.77    3.10
   9 -13   1    0.81    3.39
   9 -13   1    1.94    3.73
  10 -13   1    4.33    3.53
  10 -13   1   -1.44    3.56
  11 -13   1    4.70    3.90
  11 -13   1    5.68    3.76
  12 -13   1    6.91    3.80
  13 -13   1    8.77    3.84
  13  12  -1    1.91    2.91
  13  12  -1    2.69    4.09
  13  12  -1   -6.26    3.34
  12  12  -1   -2.32    3.15
  12  12  -1    5.44    3.94
  12  12  -1    3.75    2.71
  11  12  -1   -1.31    2.98
  11  12  -1    0.10    3.52
  11  12  -1    0.76    2.46
  10  12  -1   31.63    4.29
  10  12  -1   22.50    3.42
  10  12  -1   24.31    3.06
   9  12  -1   32.14    4.04
   9  12  -1   26.24    3.49
   9  12  -1   33.74    4.09
   8  12  -1    7.98    2.90
   8  12  -1   10.09    3.39
   8  12  -1    5.99    2.28
   7  12  -1   16.59    3.41
   7  12  -1   13.19    3.04
   7  12  -1   15.26    2.55
   7  12  -1   15.93    1.29
  -7 -12   1   15.07    2.49
   6  12  -1   29.64    3.36
   6  12  -1   32.07    3.78
   6  12  -1   28.83    2.05
  -6 -12   1   32.20    2.77
   5  12  -1    3.81    2.04
   5  12  -1    4.92    2.35
   5  12  -1    3.35    1.59
   5  12  -1    2.58    2.75
  -5 -12   1    5.31    2.25
   4  12  -1   20.69    2.40
   4  12  -1   21.44    2.58
   4  12  -1   25.99    3.25
  -4 -12   1   24.59    2.61
   3  12  -1    0.33    2.76
   3  12  -1    0.75    1.80
   3  12  -1    1.26    1.67
  -3 -12   1    1.52    2.15
   2  12  -1   14.97    2.83
   2  12  -1   12.56    1.64
   2  12  -1   12.41    2.32
  -2 -12   1   15.49    2.61
   1  12  -1   27.01    3.33
   1  12  -1   24.62    2.75
  -1 -12   1   27.76    2.74
   0  12  -1  104.15    4.55
   0  12  -1   97.41    4.29
   0 -12   1   95.34    3.95
  -1  12  -1   24.60    3.38
   1 -12   1   20.24    2.83
  -2  12  -1    0.32    2.95
   2 -12   1    1.47    2.01
   2 -12   1    2.93    2.61
  -3  12  -1   69.63    4.25
   3 -12   1   72.13    4.62
   3 -12   1   78.74    4.27
  -4  12  -1    1.78    3.44
   4 -12   1    1.60    3.20
   4 -12   1    1.32    2.27
  -5  12  -1    5.32    3.76
   5 -12   1    9.21    3.18
   5 -12   1   11.78    2.86
  -6  12  -1    5.72    3.47
   6 -12   1    2.96    3.28
   6 -12   1    3.79    2.83
  -7  12  -1   11.68    3.67
   7 -12   1   10.49    3.20
   7 -12   1    9.73    3.54
  -8  12  -1    5.35    3.36
   8 -12   1    5.55    3.39
   8 -12   1   -1.84    2.88
   9 -12   1   51.96    4.83
   9 -12   1   41.25    4.87
  10 -12   1   22.47    4.36
  10 -12   1   31.64    4.48
  11 -12   1    2.27    3.70
  11 -12   1    1.06    3.54
  12 -12   1   -1.41    3.79
  12 -12   1   -0.99    3.37
  13 -12   1    2.15    4.42
  13 -12   1    5.93    3.51
  14  11  -1    4.67    3.19
  14  11  -1   -5.83    3.50
  14  11  -1    6.99    4.38
  13  11  -1   13.81    3.28
  13  11  -1   12.67    4.46
  13  11  -1    1.69    3.49
  12  11  -1   11.71    4.43
  12  11  -1   14.32    3.03
  12  11  -1    6.62    3.36
  11  11  -1    0.92    2.95
  11  11  -1    1.91    3.84
  11  11  -1    5.17    2.58
  10  11  -1   22.87    3.37
  10  11  -1   26.10    4.31
  10  11  -1   20.63    2.89
   9  11  -1    1.40    2.70
   9  11  -1    5.41    3.23
   9  11  -1    3.10    2.18
   8  11  -1   -0.11    1.99
   8  11  -1   -0.46    2.61
   8  11  -1   -0.74    2.91
   7  11  -1   11.05    2.90
   7  11  -1    7.69    3.23
   7  11  -1   10.31    1.18
   7  11  -1    6.25    2.17
   7  11  -1    9.94    1.04
  -7 -11   1    8.51    2.26
   6  11  -1    5.60    2.04
   6  11  -1    5.69    1.39
   6  11  -1    8.36    2.69
  -6 -11   1    7.41    2.08
   5  11  -1   33.40    3.21
   5  11  -1   30.35    2.20
   5  11  -1   31.93    3.43
   5  11  -1   28.90    3.26
  -5 -11   1   32.57    2.79
   4  11  -1   81.65    4.07
   4  11  -1   74.72    3.39
   4  11  -1   79.56    3.74
  -4 -11   1   72.75    3.30
   3  11  -1   97.62    4.09
   3  11  -1  103.74    3.42
   3  11  -1  109.61    4.32
  -3 -11   1  107.30    3.74
   2  11  -1    0.80    2.63
   2  11  -1    1.48    1.82
  -2 -11   1   -0.73    2.06
   1  11  -1   71.92    3.92
   1  11  -1   72.04    4.02
  -1 -11   1   61.92    3.27
   0  11  -1    0.20    1.90
   0  11  -1    1.43    2.55
   0 -11   1    3.04    2.24
  -1  11  -1   15.14    2.99
   1 -11   1   12.44    2.52
  -2  11  -1   29.97    3.44
   2 -11   1   30.05    3.10
   2 -11   1   29.96    3.58
  -3  11  -1   63.33    3.93
   3 -11   1   61.26    3.84
   3 -11   1   68.17    4.12
  -4  11  -1    4.16    3.24
   4 -11   1    8.06    2.37
   4 -11   1    9.77    2.87
  -5  11  -1   49.15    4.44
   5 -11   1   48.65    3.96
   5 -11   1   51.01    4.58
  -6  11  -1   48.25    4.11
   6 -11   1   43.62    4.87
   6 -11   1   43.17    4.16
  -7  11  -1    3.68    3.31
   7 -11   1    4.53    3.25
   7 -11   1    5.18    2.89
  -8  11  -1   -0.24    3.00
   8 -11   1   -2.07    2.77
   8 -11   1    1.05    3.48
   9 -11   1   -1.97    2.99
   9 -11   1    1.63    3.17
  10 -11   1    4.43    3.16
  10 -11   1    0.31    3.24
  11 -11   1    0.38    3.72
  11 -11   1    0.94    3.38
  12 -11   1    0.83    3.10
  12 -11   1    0.63    4.00
  13 -11   1    2.24    3.15
  13 -11   1    3.01    4.04
  14 -11   1    5.73    3.40
  14 -11   1    3.18    4.62
  14  10  -1    3.68    3.10
  14  10  -1   -5.82    3.29
  14  10  -1    3.24    4.50
  13  10  -1    3.53    4.36
  13  10  -1   -5.73    3.20
  13  10  -1    4.14    2.83
  12  10  -1    2.99    3.75
  12  10  -1   -1.16    3.03
  12  10  -1    3.08    2.56
  11  10  -1   20.32    4.11
  11  10  -1   15.00    2.84
  11  10  -1   11.52    3.17
  10  10  -1    3.19    2.26
  10  10  -1   -1.78    2.71
  10  10  -1    3.27    3.39
   9  10  -1    2.27    3.03
   9  10  -1    2.74    2.14
   9  10  -1    1.18    2.56
   8  10  -1   -3.82    3.17
   8  10  -1   -1.22    1.94
   8  10  -1    1.27    2.61
  -8 -10   1   -1.29    2.29
   7  10  -1   35.12    3.50
   7  10  -1   34.61    1.15
   7  10  -1   36.10    1.21
   7  10  -1   36.66    3.80
   7  10  -1   45.44    4.47
  -7 -10   1   37.72    2.77
   6  10  -1    5.60    1.23
   6  10  -1    4.01    2.65
   6  10  -1    6.27    1.88
  -6 -10   1    2.11    1.83
   5  10  -1    7.18    1.81
   5  10  -1    7.89    2.57
   5  10  -1    5.51    2.32
   5  10  -1    7.51    1.45
  -5 -10   1    8.14    1.92
   4  10  -1    4.08    2.31
   4  10  -1    3.85    1.98
   4  10  -1    3.21    1.72
  -4 -10   1    5.52    1.85
   3  10  -1   15.55    2.15
   3  10  -1   17.23    2.00
   3  10  -1   17.73    2.71
  -3 -10   1   19.77    2.11
   2  10  -1   81.11    3.78
   2  10  -1   80.99    3.79
  -2 -10   1   77.21    3.35
   1  10  -1   58.45    3.36
   1  10  -1   64.19    3.74
  -1 -10   1   62.47    3.13
   0  10  -1   16.39    2.26
   0  10  -1   21.61    2.98
   0 -10   1   18.05    2.48
  -1  10  -1   39.89    3.33
   1 -10   1   38.38    3.11
  -2  10  -1  186.35    5.26
   2 -10   1  182.98    5.53
   2 -10   1  183.59    5.03
  -3  10  -1   70.11    3.85
   3 -10   1   72.14    4.24
   3 -10   1   72.92    3.83
  -4  10  -1    2.00    2.94
   4 -10   1    3.75    2.52
   4 -10   1    3.46    2.08
  -5  10  -1    0.30    3.07
   5 -10   1    0.09    2.19
   5 -10   1    1.84    2.54
  -6  10  -1    7.34    3.04
   6 -10   1    6.14    3.52
   6 -10   1    7.71    2.65
   6 -10   1    3.82    2.86
  -7  10  -1   -0.61    2.90
   7 -10   1    1.50    2.97
   7 -10   1   -2.88    2.80
   7 -10   1   -0.93    2.60
  -8  10  -1   21.10    3.87
   8 -10   1   18.91    3.74
   8 -10   1   14.10    3.30
   9 -10   1   13.27    3.60
   9 -10   1   11.23    3.45
  10 -10   1    3.09    3.19
  10 -10   1    5.57    3.34
  11 -10   1   12.65    3.38
  11 -10   1    7.64    3.72
  12 -10   1    6.73    3.24
  12 -10   1    5.44    3.86
  13 -10   1   -1.18    4.05
  13 -10   1    1.56    2.90
  14 -10   1   -2.79    4.11
  14 -10   1    4.46    3.15
  14   9  -1   19.45    4.92
  14   9  -1    5.43    3.54
  14   9  -1   16.68    3.56
  13   9  -1    3.85    2.80
  13   9  -1    1.33    3.97
  13   9  -1   -6.23    3.04
  12   9  -1    4.15    2.61
  12   9  -1    7.54    4.03
  12   9  -1   -1.64    2.99
  11   9  -1    0.96    2.89
  11   9  -1    7.37    3.73
  11   9  -1    8.05    2.51
  10   9  -1    2.24    2.63
  10   9  -1    0.22    3.54
  10   9  -1    0.23    2.08
   9   9  -1    4.83    2.56
   9   9  -1    5.12    3.25
   9   9  -1    6.11    2.19
   8   9  -1    4.62    3.13
   8   9  -1    3.46    2.55
   8   9  -1    3.68    2.02
  -8  -9   1    3.75    2.01
   7   9  -1   -0.52    1.71
   7   9  -1    1.68    0.52
   7   9  -1    0.50    2.21
   7   9  -1   -0.56    2.81
   7   9  -1    2.30    0.51
  -7  -9   1   -0.69    1.76
   6   9  -1   22.55    1.63
   6   9  -1   20.75    2.84
   6   9  -1   17.64    2.08
   6   9  -1   17.57    1.40
  -6  -9   1   22.12    2.12
   5   9  -1   73.48    3.36
   5   9  -1   78.96    3.58
   5   9  -1   71.33    3.44
   5   9  -1   76.85    2.38
  -5  -9   1   78.95    2.85
   4   9  -1   87.60    3.54
   4   9  -1   87.63    3.52
   4   9  -1   85.40    2.65
   4   9  -1   88.78    3.63
  -4  -9   1   85.71    3.05
   3   9  -1   22.11    2.14
   3   9  -1   21.38    2.75
   3   9  -1   24.38    2.73
  -3  -9   1   20.12    2.02
   2   9  -1   32.29    2.68
   2   9  -1   27.48    2.83
  -2  -9   1   27.45    2.65
   1   9  -1   23.38    2.89
   1   9  -1   24.16    2.74
  -1  -9   1   31.39    2.65
   0   9  -1    8.26    1.94
   0   9  -1   10.33    2.51
   0  -9   1   10.36    2.11
  -1   9  -1   -3.43    2.40
   1  -9   1   -0.89    2.07
  -2   9  -1   17.24    2.93
   2  -9   1   14.15    2.29
   2  -9   1   16.56    2.62
  -3   9  -1   -3.45    2.50
   3  -9   1   -1.01    1.86
   3  -9   1   -3.56    2.30
  -4   9  -1   14.41    3.06
   4  -9   1   13.08    2.91
   4  -9   1   11.20    2.34
  -5   9  -1   45.78    3.82
   5  -9   1   45.59    3.79
   5  -9   1   45.37    3.51
  -6   9  -1    2.59    2.67
   6  -9   1   -0.52    2.81
   6  -9   1    2.33    2.26
   6  -9   1    3.39    2.65
  -7   9  -1   33.73    3.83
   7  -9   1   22.72    3.26
   7  -9   1   28.55    3.63
   7  -9   1   26.75    3.64
  -8   9  -1   10.56    3.09
   8  -9   1   10.28    3.37
   8  -9   1    8.32    3.03
   8  -9   1    5.85    3.01
   9  -9   1    5.28    2.87
   9  -9   1   -0.64    3.00
  10  -9   1    3.04    3.14
  10  -9   1    6.86    3.17
  11  -9   1    7.38    3.62
  11  -9   1    8.27    3.28
  12  -9   1    2.14    2.95
  12  -9   1   -0.78    3.47
  13  -9   1    7.88    4.16
  13  -9   1    7.85    3.01
  14  -9   1   10.59    4.60
  14  -9   1   19.15    3.26
  14   8  -1    3.57    3.11
  14   8  -1   -2.73    4.09
  14   8  -1   -3.79    3.18
  13   8  -1   -0.99    3.06
  13   8  -1    2.67    2.75
  13   8  -1    9.79    4.25
  12   8  -1   -0.50    2.43
  12   8  -1    1.87    3.82
  12   8  -1   -0.92    2.91
  11   8  -1    8.51    2.53
  11   8  -1    9.57    3.71
  11   8  -1    6.60    2.91
  10   8  -1    4.43    2.22
  10   8  -1    5.21    3.76
  10   8  -1    5.17    2.62
   9   8  -1   48.75    3.97
   9   8  -1   46.08    4.68
   9   8  -1   51.35    4.70
   8   8  -1   11.67    2.50
   8   8  -1   13.36    3.31
   8   8  -1   13.17    2.18
  -8  -8   1   10.42    2.05
   7   8  -1   18.24    3.07
   7   8  -1   15.80    2.40
   7   8  -1   12.83    1.96
  -7  -8   1   17.58    1.98
   6   8  -1    7.25    2.64
   6   8  -1    5.37    0.97
   6   8  -1    3.33    1.57
   6   8  -1    6.28    0.97
   6   8  -1    4.65    1.99
  -6  -8   1    6.68    1.73
   5   8  -1   -0.62    2.14
   5   8  -1   -0.27    1.35
   5   8  -1    0.58    1.07
  -5  -8   1   -0.29    1.56
   4   8  -1    1.05    1.23
   4   8  -1    1.68    1.76
   4   8  -1    0.46    1.40
   4   8  -1    3.66    2.01
  -4  -8   1   -0.24    1.54
   3   8  -1   68.40    2.90
   3   8  -1   65.29    2.98
   3   8  -1   64.97    3.26
  -3  -8   1   62.91    2.71
   2   8  -1    2.10    2.15
   2   8  -1    2.01    1.57
  -2  -8   1    5.17    1.76
   1   8  -1    0.29    1.97
   1   8  -1    0.05    1.47
  -1  -8   1    1.01    1.84
   0   8  -1   97.65    3.74
   0   8  -1   97.02    3.42
   0  -8   1   97.38    3.20
  -1   8  -1   47.09    2.97
   1  -8   1   53.87    2.86
   1  -8   1   51.90    3.17
  -2   8  -1    2.59    2.33
   2  -8   1    1.92    1.76
   2  -8   1    3.16    2.19
  -3   8  -1    4.77    2.51
   3  -8   1   -0.24    2.25
   3  -8   1    4.72    1.94
  -4   8  -1   -0.34    2.62
   4  -8   1    1.20    1.88
   4  -8   1    0.45    2.17
  -5   8  -1    8.69    2.55
   5  -8   1    5.00    2.39
   5  -8   1    6.86    2.20
   5  -8   1    5.56    2.38
  -6   8  -1    7.01    2.87
   6  -8   1    5.25    2.59
   6  -8   1    2.79    2.10
   6  -8   1    5.41    2.75
  -7   8  -1   56.23    3.91
   7  -8   1   61.63    4.76
   7  -8   1   57.15    3.71
   7  -8   1   57.66    5.21
  -8   8  -1    4.83    3.01
   8  -8   1    2.22    2.58
   8  -8   1    5.31    2.99
   8  -8   1    6.05    3.05
   9  -8   1    3.02    3.05
   9  -8   1    4.07    2.99
   9  -8   1    1.66    2.84
  10  -8   1   64.21    4.22
  10  -8   1   65.31    6.12
  11  -8   1   11.52    3.70
  11  -8   1   11.90    3.16
  12  -8   1    3.02    3.48
  12  -8   1    3.89    2.66
  13  -8   1    3.31    2.72
  13  -8   1    1.29    3.68
  14  -8   1   -2.72    3.86
  14  -8   1    1.63    2.64
  14   7  -1   -6.84    3.08
  14   7  -1    6.40    4.34
  14   7  -1    4.26    3.04
  13   7  -1   12.62    3.07
  13   7  -1    3.35    3.19
  13   7  -1    9.23    4.19
  12   7  -1   21.47    3.10
  12   7  -1   18.38    4.41
  12   7  -1   16.10    3.27
  11   7  -1    3.39    2.35
  11   7  -1    1.07    2.75
  11   7  -1    1.64    3.86
  10   7  -1    0.98    3.28
  10   7  -1    3.43    2.16
  10   7  -1    1.22    2.53
   9   7  -1    9.62    3.53
   9   7  -1   11.18    2.64
   9   7  -1    9.59    2.23
   8   7  -1    0.17    2.22
   8   7  -1   -0.06    1.72
   8   7  -1   -1.54    3.15
  -8  -7   1   -2.03    1.65
   7   7  -1    0.73    1.96
   7   7  -1   -0.60    2.54
   7   7  -1   -1.14    1.48
  -7  -7   1   -1.07    1.58
   6   7  -1   97.14    3.48
   6   7  -1   89.10    1.94
   6   7  -1   93.47    3.85
   6   7  -1   92.73    1.99
   6   7  -1   90.92    4.07
  -6  -7   1   87.99    2.84
   5   7  -1    4.20    2.10
   5   7  -1    1.12    0.99
   5   7  -1    2.30    1.35
  -5  -7   1    2.12    1.47
   4   7  -1   67.66    3.31
   4   7  -1   62.21    2.08
   4   7  -1   63.51    2.72
   4   7  -1   59.26    2.91
  -4  -7   1   63.61    2.44
   3   7  -1  111.46    3.49
   3   7  -1   99.18    3.05
   3   7  -1  109.52    3.25
  -3  -7   1  108.03    2.94
   2   7  -1    9.73    1.58
   2   7  -1   10.19    1.88
  -2  -7   1   10.53    1.71
   1   7  -1   18.46    2.21
   1   7  -1   20.23    2.32
  -1  -7   1   19.45    1.87
   0   7  -1    6.58    1.56
   0   7  -1    8.28    2.09
   0  -7   1    5.90    1.79
  -1   7  -1    0.28    2.22
   1  -7   1    1.52    1.44
   1  -7   1    0.28    1.71
  -2   7  -1    2.87    2.18
   2  -7   1    4.07    1.95
   2  -7   1    4.51    1.65
  -3   7  -1  311.01    6.29
   3  -7   1  310.79    6.79
   3  -7   1  314.68    6.12
  -4   7  -1   11.19    2.75
   4  -7   1    8.29    2.24
   4  -7   1    7.90    2.34
   4  -7   1    3.45    1.90
  -5   7  -1   56.94    3.23
   5  -7   1   59.43    3.28
   5  -7   1   57.25    4.04
   5  -7   1   58.04    3.90
  -6   7  -1   43.70    3.38
   6  -7   1   44.01    3.18
   6  -7   1   47.55    3.70
   6  -7   1   51.16    4.45
  -7   7  -1   20.56    2.80
   7  -7   1   14.50    2.93
   7  -7   1   19.69    2.97
   7  -7   1   17.07    2.78
  -8   7  -1   10.98    2.78
   8  -7   1   10.00    2.80
   8  -7   1    7.69    2.74
   8  -7   1   11.07    3.11
   9  -7   1    0.49    2.75
   9  -7   1    2.72    3.08
   9  -7   1   -0.62    2.83
  10  -7   1   10.56    3.36
  10  -7   1    6.32    2.69
  10  -7   1    3.92    3.00
  11  -7   1   -0.86    3.19
  11  -7   1   -0.91    2.57
  12  -7   1    5.18    2.64
  12  -7   1    6.00    3.57
  13  -7   1   27.19    3.04
  13  -7   1   18.49    4.21
  14  -7   1    0.64    3.95
  15   6  -1    6.98    4.90
  15   6  -1    7.44    3.40
  14   6  -1   -0.54    4.09
  14   6  -1    3.46    2.99
  14   6  -1   -7.68    3.18
  13   6  -1   -3.54    2.95
  13   6  -1    3.40    4.03
  13   6  -1    5.51    2.82
  12   6  -1    2.03    2.52
  12   6  -1    0.54    3.77
  12   6  -1    1.02    2.82
  11   6  -1   11.18    2.93
  11   6  -1   16.20    3.91
  11   6  -1   13.38    2.70
  10   6  -1   51.42    4.68
  10   6  -1   52.45    4.21
  10   6  -1   49.99    4.89
   9   6  -1   23.84    2.85
   9   6  -1   24.09    3.93
   9   6  -1   26.73    3.61
  -9  -6   1   27.75    2.41
   8   6  -1   18.17    2.17
   8   6  -1   20.78    2.50
   8   6  -1   22.47    3.73
  -8  -6   1   19.36    2.07
   7   6  -1  143.74    4.50
   7   6  -1  142.00    4.15
   7   6  -1  133.15    5.07
  -7  -6   1  131.99    3.45
   6   6  -1    2.02    1.65
   6   6  -1    1.06    1.29
   6   6  -1    4.02    2.35
   6   6  -1    1.47    0.78
   6   6  -1    2.19    0.83
  -6  -6   1   -0.53    1.35
   5   6  -1   11.00    1.75
   5   6  -1   12.89    1.53
   5   6  -1   13.56    1.13
   5   6  -1   12.56    2.38
  -5  -6   1   15.14    1.68
   4   6  -1    9.45    1.40
   4   6  -1    9.85    1.23
   4   6  -1   10.68    2.04
  -4  -6   1   12.02    1.57
   3   6  -1  185.08    4.00
   3   6  -1  185.28    3.45
   3   6  -1  192.15    4.22
  -3  -6   1  188.60    3.70
   2   6  -1   29.31    2.23
   2   6  -1   27.92    1.92
  -2  -6   1   29.79    2.02
   1   6  -1  329.21    5.75
   1   6  -1  332.89    6.12
  -1  -6   1  330.51    5.55
   0   6  -1   31.52    2.40
   0   6  -1   35.84    2.47
   0  -6   1   37.06    2.34
  -1   6  -1  276.15    5.35
   1  -6   1  276.49    5.79
   1  -6   1  279.95    5.19
  -2   6  -1  218.12    4.75
   2  -6   1  213.51    5.13
   2  -6   1  222.93    4.59
  -3   6  -1   72.94    3.08
   3  -6   1   86.28    4.44
   3  -6   1   77.01    2.99
   3  -6   1   74.02    3.33
  -4   6  -1   27.09    2.60
   4  -6   1   25.31    2.60
   4  -6   1   28.56    3.78
   4  -6   1   24.75    3.10
  -5   6  -1    6.91    2.28
   5  -6   1    8.08    2.33
   5  -6   1    3.42    2.27
   5  -6   1    4.68    1.99
  -6   6  -1   31.03    2.66
   6  -6   1   30.36    3.57
   6  -6   1   29.93    3.97
   6  -6   1   33.11    3.11
  -7   6  -1    8.66    2.51
   7  -6   1    6.41    2.18
   7  -6   1    4.68    2.24
   7  -6   1    4.22    2.59
  -8   6  -1   40.28    3.22
   8  -6   1   43.43    3.39
   8  -6   1   49.77    4.90
   8  -6   1   42.38    4.60
   9  -6   1   38.18    3.53
   9  -6   1   48.15    5.37
   9  -6   1   43.55    5.17
  10  -6   1    5.65    2.54
  10  -6   1    4.24    3.17
  10  -6   1    5.68    3.03
  11  -6   1    3.55    3.16
  11  -6   1    4.92    3.23
  11  -6   1    4.71    2.50
  12  -6   1    0.67    2.30
  12  -6   1    1.62    3.34
  13  -6   1   -2.81    3.38
  13  -6   1    2.76    2.25
  14  -6   1   -2.90    3.81
  15  -6   1   -2.98    3.94
  15   5  -1    5.08    4.77
  15   5  -1   -3.60    3.44
  15   5  -1   12.20    3.49
  14   5  -1   21.13    3.62
  14   5  -1   14.71    4.85
  13   5  -1   11.96    2.97
  13   5  -1    0.77    3.15
  13   5  -1    4.09    4.11
  12   5  -1    1.24    2.81
  12   5  -1    8.73    2.73
  12   5  -1    3.69    3.86
  11   5  -1    4.00    3.64
  11   5  -1    4.40    2.67
  11   5  -1    7.99    2.47
  10   5  -1    3.34    2.51
  10   5  -1    4.06    2.22
  10   5  -1    4.45    3.77
   9   5  -1   -0.76    1.94
   9   5  -1    2.46    2.32
   9   5  -1    1.26    3.28
  -9  -5   1   -0.52    1.76
   8   5  -1   36.82    3.63
   8   5  -1   31.02    3.74
   8   5  -1   30.12    3.15
  -8  -5   1   26.48    2.29
   7   5  -1   14.33    2.03
   7   5  -1   12.94    0.77
   7   5  -1   12.83    1.75
   7   5  -1   13.77    0.76
   7   5  -1   15.21    2.91
  -7  -5   1   15.75    1.82
   6   5  -1   23.68    1.17
   6   5  -1   25.30    2.92
   6   5  -1   24.74    1.24
   6   5  -1   23.76    2.30
   6   5  -1   27.86    2.78
  -6  -5   1   21.23    2.03
   5   5  -1   63.39    2.61
   5   5  -1   59.70    2.95
   5   5  -1   58.62    3.38
   5   5  -1   58.57    1.68
  -5  -5   1   55.96    2.21
   4   5  -1  207.89    4.20
   4   5  -1  203.60    3.46
   4   5  -1  203.94    4.88
  -4  -5   1  196.77    3.75
   3   5  -1   35.98    1.95
   3   5  -1   33.14    1.55
   3   5  -1   34.77    2.05
  -3  -5   1   35.80    1.88
   2   5  -1    8.22    1.69
   2   5  -1    5.30    1.19
  -2  -5   1    8.15    1.44
   1   5  -1   42.44    2.47
   1   5  -1   42.87    2.27
  -1  -5   1   42.31    2.48
   0   5  -1   12.03    1.67
   0   5  -1   17.77    2.43
   0  -5   1   12.65    1.94
  -1   5  -1   15.17    2.28
   1  -5   1   16.20    1.93
   1  -5   1   16.14    2.03
  -2   5  -1   30.24    2.41
   2  -5   1   31.02    2.48
   2  -5   1   29.03    2.28
  -3   5  -1   23.08    2.26
   3  -5   1   20.44    2.17
   3  -5   1   18.96    2.21
   3  -5   1   22.01    2.61
  -4   5  -1   68.47    2.87
   4  -5   1   75.88    3.66
   4  -5   1   68.13    3.41
   4  -5   1   75.01    2.87
  -5   5  -1  141.85    4.11
   5  -5   1  136.04    4.16
   5  -5   1  143.55    4.72
   5  -5   1  140.27    4.05
   5  -5   1  148.31    5.10
  -6   5  -1   35.46    2.83
   6  -5   1   37.60    3.80
   6  -5   1   38.45    2.64
   6  -5   1   42.26    3.27
   6  -5   1   42.82    3.54
  -7   5  -1    4.26    2.20
   7  -5   1    2.40    2.25
   7  -5   1    5.07    2.16
   7  -5   1    4.09    2.33
   7  -5   1    1.82    2.04
  -8   5  -1   44.08    2.98
   8  -5   1   42.50    4.51
   8  -5   1   45.70    4.36
   8  -5   1   42.99    3.36
   8  -5   1   41.94    4.24
   9  -5   1    4.84    2.69
   9  -5   1    4.51    2.95
   9  -5   1    6.48    2.50
   9  -5   1    4.46    3.15
  10  -5   1    3.71    2.86
  10  -5   1    1.13    3.23
  10  -5   1    4.27    2.36
  10  -5   1   -0.50    2.83
  11  -5   1   53.66    3.35
  11  -5   1   65.86    5.81
  11  -5   1   47.73    5.73
  12  -5   1    0.04    3.29
  12  -5   1    4.80    2.17
  13  -5   1   -2.20    3.34
  13  -5   1    2.83    2.09
  14  -5   1   11.32    4.27
  15  -5   1   -3.50    3.96
  15   4  -1   -5.25    3.48
  15   4  -1    5.53    4.55
  14   4  -1   11.22    3.16
  14   4  -1   -7.91    3.06
  14   4  -1    0.54    3.93
  13   4  -1    6.16    2.90
  13   4  -1    0.86    4.22
  13   4  -1   -2.15    2.99
  12   4  -1   10.20    4.03
  12   4  -1    8.85    2.77
  12   4  -1    3.80    2.99
  11   4  -1    8.64    2.77
  11   4  -1   12.53    3.95
  11   4  -1   13.17    2.70
  10   4  -1    0.04    3.44
  10   4  -1    1.40    2.20
  10   4  -1    1.14    2.43
   9   4  -1   36.37    4.13
   9   4  -1   25.98    4.20
   9   4  -1   32.27    3.68
  -9  -4   1   26.88    2.52
   8   4  -1   14.65    2.24
   8   4  -1   16.13    2.06
   8   4  -1   14.90    3.27
  -8  -4   1   17.82    1.97
   7   4  -1   30.48    1.21
   7   4  -1   29.86    1.20
   7   4  -1   35.13    3.12
   7   4  -1   28.01    2.73
   7   4  -1   36.47    3.65
  -7  -4   1   26.92    2.11
   6   4  -1   20.36    2.74
   6   4  -1   15.78    1.14
   6   4  -1   17.10    1.24
   6   4  -1   16.66    2.70
   6   4  -1   14.60    1.59
  -6  -4   1   19.28    1.72
   5   4  -1    1.02    1.36
   5   4  -1   -0.57    1.14
   5   4  -1   -1.78    2.29
   5   4  -1    0.13    0.86
  -5  -4   1    1.72    1.28
   4   4  -1    3.82    1.81
   4   4  -1    2.21    0.89
   4   4  -1    2.02    0.98
   4   4  -1    3.83    1.20
  -4  -4   1    3.08    1.15
   3   4  -1   70.61    1.85
   3   4  -1   72.59    2.63
   3   4  -1   70.27    2.22
  -3  -4   1   69.24    2.09
   2   4  -1  187.23    3.60
   2   4  -1  182.41    3.75
  -2  -4   1  182.67    3.47
   1   4  -1  229.94    4.38
   1   4  -1  225.74    4.11
  -1  -4   1  219.79    4.01
   0   4  -1    5.17    1.78
   0   4  -1    4.43    1.40
   0  -4   1    3.28    1.38
  -1   4  -1   92.30    2.97
   1  -4   1   96.45    2.84
   1  -4   1   97.74    3.19
  -2   4  -1  174.83    3.93
   2  -4   1  176.22    3.77
   2  -4   1  175.77    4.36
   2  -4   1  185.67    4.53
  -3   4  -1   25.98    2.38
   3  -4   1   34.66    3.01
   3  -4   1   29.79    2.48
   3  -4   1   29.21    2.07
  -4   4  -1   35.87    2.44
   4  -4   1   39.68    3.18
   4  -4   1   38.17    2.46
   4  -4   1   37.01    2.82
   4  -4   1   37.73    2.43
  -5   4  -1   18.90    2.12
   5  -4   1   19.52    2.47
   5  -4   1   18.83    2.15
   5  -4   1   18.41    2.37
   5  -4   1   17.00    2.10
  -6   4  -1    2.86    1.94
   6  -4   1    0.65    1.84
   6  -4   1   -1.51    1.97
   6  -4   1   -1.26    1.91
   6  -4   1    1.10    1.75
  -7   4  -1   23.62    2.39
   7  -4   1   22.05    2.58
   7  -4   1   24.72    2.35
   7  -4   1   21.12    2.68
   7  -4   1   26.32    3.00
  -8   4  -1   25.99    2.61
   8  -4   1   23.56    2.39
   8  -4   1   23.16    2.99
   8  -4   1   21.95    2.76
   8  -4   1   27.86    3.63
   9  -4   1    4.52    2.20
   9  -4   1    2.99    2.61
   9  -4   1    0.45    3.34
   9  -4   1    2.20    2.61
  10  -4   1   22.74    3.39
  10  -4   1   23.21    4.29
  10  -4   1   24.61    2.61
  10  -4   1   21.60    3.47
  11  -4   1   10.88    2.19
  11  -4   1    9.05    3.24
  11  -4   1    9.82    3.68
  11  -4   1   14.91    3.33
  12  -4   1    5.38    1.95
  12  -4   1    4.73    3.30
  12  -4   1    8.94    3.20
  13  -4   1   -0.46    3.34
  14  -4   1    0.34    3.71
  15  -4   1   -2.60    3.94
  15   3  -1    9.99    4.72
  15   3  -1   -2.15    3.60
  14   3  -1   14.86    3.39
  14   3  -1    6.13    4.26
  13   3  -1   14.35    3.15
  13   3  -1    4.65    3.20
  13   3  -1   11.82    4.31
  12   3  -1   38.59    4.85
  12   3  -1   28.04    4.66
  12   3  -1   20.67    3.50
  11   3  -1    2.78    3.93
  11   3  -1    3.53    2.42
  11   3  -1    0.17    2.61
  10   3  -1   -1.11    3.45
  10   3  -1    3.36    2.23
  10   3  -1    6.46    2.52
 -10  -3   1    2.71    2.41
   9   3  -1    6.79    3.32
   9   3  -1    4.10    2.08
   9   3  -1   10.39    2.39
  -9  -3   1    6.55    1.88
   8   3  -1    5.90    0.94
   8   3  -1    6.64    0.98
   8   3  -1    6.79    2.03
   8   3  -1    0.14    2.69
   8   3  -1    4.32    1.82
  -8  -3   1    5.54    1.69
   7   3  -1   16.80    1.98
   7   3  -1   17.94    1.30
   7   3  -1   17.26    1.87
   7   3  -1   17.04    1.34
   7   3  -1   18.85    3.01
  -7  -3   1   19.13    1.80
   6   3  -1  193.51    3.27
   6   3  -1  191.70    4.17
   6   3  -1  198.44    4.42
   6   3  -1  190.68    4.50
   6   3  -1  186.89    5.33
  -6  -3   1  187.56    3.85
   5   3  -1   74.93    3.55
   5   3  -1   76.03    2.93
   5   3  -1   77.60    2.68
   5   3  -1   71.50    1.88
  -5  -3   1   74.07    2.35
   4   3  -1    8.97    1.20
   4   3  -1    8.87    1.92
   4   3  -1   10.41    0.98
   4   3  -1    7.53    1.07
  -4  -3   1    9.42    1.23
   3   3  -1  142.31    3.51
   3   3  -1  136.99    3.05
   3   3  -1  140.14    2.90
   3   3  -1  135.43    2.51
  -3  -3   1  133.31    2.68
   2   3  -1   18.90    1.78
   2   3  -1   11.74    1.22
   2   3  -1   14.46    1.29
  -2  -3   1   14.92    1.39
   1   3  -1    5.17    1.10
   1   3  -1    4.49    0.91
  -1  -3   1    4.06    0.96
   0   3  -1   -0.74    1.13
   0   3  -1    0.00    0.79
   0  -3   1   -0.23    0.71
   0  -3   1   -0.86    0.82
  -1   3  -1  169.48    3.22
   1  -3   1  164.30    3.03
   1  -3   1  162.08    3.38
  -2   3  -1   52.54    2.44
   2  -3   1   55.96    2.62
   2  -3   1   52.76    2.30
   2  -3   1   65.76    3.20
   2  -3   1   52.48    1.35
  -3   3  -1   43.60    2.35
   3  -3   1   44.82    2.15
   3  -3   1   48.20    2.81
   3  -3   1   49.85    1.69
   3  -3   1   46.61    2.55
   3  -3   1   44.19    2.28
  -4   3  -1   60.21    2.40
   4  -3   1   60.63    3.07
   4  -3   1   59.65    2.89
   4  -3   1   61.79    2.62
   4  -3   1   60.33    2.36
  -5   3  -1    4.23    1.77
   5  -3   1    3.01    1.94
   5  -3   1    2.86    1.55
   5  -3   1    1.35    1.59
   5  -3   1    1.90    1.78
  -6   3  -1   85.56    2.93
   6  -3   1   88.00    2.93
   6  -3   1   84.58    3.83
   6  -3   1   87.74    4.10
   6  -3   1   93.21    4.15
  -7   3  -1    0.13    1.61
   7  -3   1   -0.46    1.78
   7  -3   1    2.45    2.38
   7  -3   1   -1.23    1.93
   7  -3   1    1.03    1.75
   8  -3   1    0.82    1.78
   8  -3   1   -0.49    2.14
   8  -3   1   -1.36    1.99
   8  -3   1   -2.85    2.57
   9  -3   1    6.44    2.54
   9  -3   1    6.34    2.70
   9  -3   1   10.80    2.12
   9  -3   1    8.40    3.31
  10  -3   1    1.81    1.98
  10  -3   1    1.58    2.66
  10  -3   1    3.51    2.82
  10  -3   1    2.63    3.49
  11  -3   1    7.45    2.92
  11  -3   1    2.46    3.81
  11  -3   1    5.55    1.83
  11  -3   1    1.57    2.81
  12  -3   1    3.43    3.07
  12  -3   1    6.46    3.89
  12  -3   1    4.27    1.65
  12  -3   1    7.97    3.04
  13  -3   1   13.44    3.70
  13  -3   1   22.97    4.12
  14  -3   1   -0.59    3.51
  15  -3   1   -4.85    3.66
  15   2  -1    0.46    4.67
  15   2  -1   -4.85    3.52
  14   2  -1   -4.82    3.23
  14   2  -1    4.21    4.56
  14   2  -1   12.13    3.35
  13   2  -1    2.76    3.13
  13   2  -1   10.46    3.07
  13   2  -1    8.16    4.10
  12   2  -1    7.17    4.01
  12   2  -1    8.96    3.12
  12   2  -1   14.38    2.94
  11   2  -1    4.66    2.73
  11   2  -1    6.31    3.82
  11   2  -1    5.50    2.48
  10   2  -1   43.59    4.95
  10   2  -1   42.72    4.62
  10   2  -1   40.83    1.31
  10   2  -1   37.67    4.29
 -10  -2   1   42.15    2.96
   9   2  -1   10.78    3.33
   9   2  -1   13.32    2.49
   9   2  -1   13.79    1.32
   9   2  -1   15.87    1.33
   9   2  -1   11.65    2.28
  -9  -2   1   12.68    2.04
   8   2  -1   12.99    3.09
   8   2  -1   14.22    1.51
   8   2  -1    8.42    1.93
   8   2  -1   11.42    1.26
   8   2  -1   12.29    2.16
  -8  -2   1    9.84    1.80
   7   2  -1   58.02    3.91
   7   2  -1   62.69    3.18
   7   2  -1   59.96    1.96
   7   2  -1   64.67    3.46
  -7  -2   1   63.04    2.54
   6   2  -1   21.99    2.76
   6   2  -1   18.45    2.77
   6   2  -1   14.86    1.45
   6   2  -1   14.43    1.65
  -6  -2   1   21.13    1.72
   5   2  -1   10.51    1.15
   5   2  -1   10.08    1.46
   5   2  -1    8.98    1.33
   5   2  -1    8.97    2.29
  -5  -2   1   11.96    1.45
   4   2  -1    4.00    1.10
   4   2  -1    4.57    1.78
   4   2  -1    5.48    0.94
   4   2  -1    2.59    1.00
  -4  -2   1    3.38    1.14
   3   2  -1   51.10    1.97
   3   2  -1   51.49    1.56
   3   2  -1   54.45    2.17
   3   2  -1   54.90    2.59
  -3  -2   1   52.26    1.89
   2   2  -1  118.27    2.21
   2   2  -1  117.45    2.46
   2   2  -1  118.69    2.64
  -2  -2   1  111.90    2.21
   1   2  -1    8.53    0.93
   1   2  -1    8.72    0.91
  -1  -2   1    7.46    0.70
   0   2  -1   35.87    1.35
   0   2  -1   37.03    1.08
   0  -2   1   36.27    1.00
   0  -2   1   35.41    1.13
  -1   2  -1  111.35    2.14
   1  -2   1  109.01    2.04
   1  -2   1  114.41    2.34
  -2   2  -1  395.59    6.02
   2  -2   1  398.71    6.29
   2  -2   1  406.01    5.67
   2  -2   1  392.96    5.85
   2  -2   1  393.49    6.05
  -3   2  -1   14.49    1.72
   3  -2   1   17.73    1.61
   3  -2   1   19.75    2.35
   3  -2   1   14.74    1.80
   3  -2   1   17.60    2.09
   3  -2   1   17.61    1.86
  -4   2  -1    0.40    1.33
   4  -2   1   -1.13    1.59
   4  -2   1    0.76    1.30
   4  -2   1    0.74    1.18
   4  -2   1    1.89    1.17
   4  -2   1   -0.80    1.20
  -5   2  -1    2.20    1.54
   5  -2   1    2.04    1.47
   5  -2   1    2.20    1.99
   5  -2   1    0.49    1.44
   5  -2   1    1.44    1.55
   6  -2   1  118.59    3.14
   6  -2   1  125.57    4.15
   6  -2   1  120.41    4.18
   6  -2   1  125.80    4.67
   7  -2   1   25.43    3.22
   7  -2   1   25.17    2.13
   7  -2   1   26.93    3.34
   7  -2   1   25.12    3.10
   8  -2   1   24.60    3.41
   8  -2   1   20.36    2.11
   8  -2   1   17.32    2.51
   8  -2   1   16.83    2.43
   9  -2   1   52.28    4.39
   9  -2   1   43.63    4.94
   9  -2   1   45.57    2.57
   9  -2   1   45.51    4.43
  10  -2   1    7.57    2.81
  10  -2   1    7.77    1.77
  10  -2   1    7.58    3.58
  10  -2   1    8.09    2.73
  11  -2   1    4.64    3.62
  11  -2   1    3.16    1.50
  11  -2   1    6.07    2.82
  11  -2   1    2.65    2.77
  12  -2   1    3.76    3.81
  12  -2   1   -1.93    2.85
  12  -2   1    9.18    3.07
  13  -2   1    2.39    3.26
  13  -2   1    9.73    3.19
  14  -2   1   -2.96    3.30
  15  -2   1   -0.89    3.74
  15   1  -1   -2.57    3.57
  15   1  -1   -1.69    4.36
  14   1  -1    0.50    3.51
  14   1  -1    5.75    4.27
  13   1  -1    1.42    3.22
  13   1  -1    8.07    4.12
  13   1  -1   13.45    3.13
  12   1  -1    3.41    3.85
  12   1  -1    4.97    2.74
  12   1  -1   -0.77    2.84
  11   1  -1    6.24    2.59
  11   1  -1    1.37    2.69
  11   1  -1    4.82    1.05
  11   1  -1    1.49    3.57
  10   1  -1    1.67    2.57
  10   1  -1    2.65    2.40
  10   1  -1    5.12    1.37
  10   1  -1   -0.74    3.75
   9   1  -1    2.26    2.29
   9   1  -1   -2.42    2.93
   9   1  -1    0.06    1.38
   9   1  -1    0.96    2.07
  -9  -1   1    0.92    1.71
   8   1  -1   22.76    2.37
   8   1  -1   20.93    1.78
   8   1  -1   18.46    2.38
   8   1  -1   23.35    3.39
  -8  -1   1   23.17    2.07
   7   1  -1   49.31    3.75
   7   1  -1   48.14    3.18
   7   1  -1   52.36    2.10
   7   1  -1   53.66    3.32
  -7  -1   1   46.93    2.43
   6   1  -1   -0.51    1.23
   6   1  -1   -0.20    1.44
   6   1  -1    1.97    1.55
   6   1  -1   -1.73    2.30
  -6  -1   1   -0.35    1.42
   5   1  -1   66.58    2.78
   5   1  -1   67.94    3.38
   5   1  -1   67.48    2.07
   5   1  -1   70.91    2.95
  -5  -1   1   69.86    2.23
   4   1  -1   92.39    2.79
   4   1  -1   91.39    2.12
   4   1  -1   90.45    2.68
   4   1  -1   90.84    3.26
  -4  -1   1   89.66    2.32
   3   1  -1  133.70    3.08
   3   1  -1  140.80    3.19
   3   1  -1  142.40    3.63
   3   1  -1  134.84    2.62
  -3  -1   1  134.53    2.75
   2   1  -1   16.88    1.45
   2   1  -1   12.69    0.97
   2   1  -1   12.12    1.27
  -2  -1   1   13.56    1.07
   1   1  -1  349.24    4.69
   1   1  -1  326.60    4.81
   1   1  -1  348.28    4.83
  -1  -1   1  338.00    4.66
  -1   1  -1   76.71    1.40
  -1   1  -1   76.34    1.41
   1  -1   1   79.41    1.42
   1  -1   1   77.05    1.39
   1  -1   1   77.18    1.51
  -2   1  -1   26.17    1.23
   2  -1   1   28.30    1.47
   2  -1   1   25.29    1.30
   2  -1   1   25.68    1.66
   2  -1   1   27.92    1.52
  -3   1  -1  124.45    3.06
   3  -1   1  118.84    2.55
   3  -1   1  125.66    3.20
   3  -1   1  120.03    3.34
   3  -1   1  128.23    2.94
   4  -1   1   22.63    2.29
   4  -1   1   21.13    1.52
   4  -1   1   23.22    2.02
   4  -1   1   22.24    1.94
   4  -1   1   20.57    2.13
   5  -1   1  104.05    2.54
   5  -1   1  106.48    3.28
   5  -1   1  107.32    3.82
   5  -1   1  107.94    3.33
   6  -1   1   30.51    2.75
   6  -1   1   30.48    2.88
   6  -1   1   29.60    3.18
   6  -1   1   28.74    1.93
   7  -1   1   -0.58    1.65
   7  -1   1   -0.89    2.39
   7  -1   1    0.68    1.29
   7  -1   1    0.03    1.60
   8  -1   1    0.91    1.87
   8  -1   1    0.75    1.35
   8  -1   1    0.29    1.90
   8  -1   1   -0.93    2.77
   9  -1   1    4.57    1.47
   9  -1   1    3.19    2.28
   9  -1   1    3.86    3.30
   9  -1   1    3.61    2.28
  10  -1   1    7.01    2.64
  10  -1   1    3.33    2.57
  10  -1   1    5.69    1.41
  10  -1   1    4.19    3.46
  11  -1   1    6.71    3.75
  11  -1   1    8.41    1.13
  11  -1   1   11.40    2.86
  11  -1   1    5.04    2.77
  12  -1   1    9.82    4.08
  12  -1   1   10.08    3.13
  12  -1   1   16.73    3.24
  13  -1   1   -0.74    3.00
  13  -1   1    1.96    4.35
  13  -1   1    9.10    3.03
  14  -1   1   15.02    3.53
  14  -1   1    5.08    3.62
  15  -1   1    0.41    3.73
  15   0  -1   -6.78    3.53
  15   0  -1    0.08    4.35
  14   0  -1    7.12    4.17
  14   0  -1   -4.83    3.28
  13   0  -1   10.24    3.10
  13   0  -1    9.91    4.41
  13   0  -1   -1.12    3.19
  12   0  -1    3.60    3.12
  12   0  -1   11.31    3.00
  12   0  -1    7.83    4.31
  11   0  -1    7.22    2.69
  11   0  -1    9.03    3.99
  11   0  -1    2.99    2.73
  11   0  -1    7.56    1.52
  10   0  -1   10.41    3.67
  10   0  -1   13.02    2.83
  10   0  -1   13.85    1.82
  10   0  -1    9.58    2.70
   9   0  -1    2.03    2.20
   9   0  -1   -0.30    3.07
   9   0  -1    3.14    2.31
   9   0  -1    3.15    1.62
   8   0  -1   33.32    3.65
   8   0  -1   25.39    3.47
   8   0  -1   26.45    3.53
   8   0  -1   26.90    2.14
   7   0  -1    1.85    1.81
   7   0  -1    0.94    2.47
   7   0  -1    1.72    1.41
   7   0  -1    0.89    1.70
  -7   0   1    1.94    1.59
   6   0  -1    4.07    1.45
   6   0  -1    6.35    1.75
   6   0  -1    5.27    1.67
   6   0  -1    3.67    2.36
  -6   0   1    5.05    1.57
   5   0  -1   -0.38    1.97
   5   0  -1    0.52    1.20
   5   0  -1    0.50    1.40
   5   0  -1   -0.04    1.35
  -5   0   1    0.14    1.25
   4   0  -1    1.75    1.20
   4   0  -1   -0.27    1.18
   4   0  -1   -0.29    1.03
   4   0  -1    0.21    1.67
  -4   0   1   -0.22    1.17
  -4   0   1    0.06    1.20
   3   0  -1    1.73    1.20
   3   0  -1    6.80    1.86
   3   0  -1    1.21    1.30
  -3   0   1    3.53    1.38
  -3   0   1    2.33    1.39
   2   0  -1  265.35    3.94
   2   0  -1  262.93    4.24
   2   0  -1  258.01    4.25
  -2   0   1  268.56    3.97
  -2   0   1  251.08    3.97
   1   0  -1  152.70    2.27
   1   0  -1  150.25    2.51
   1   0  -1  146.34    2.42
  -1   0   1  148.52    2.25
   1   0   1   38.42    1.04
   1   0   1   38.57    1.09
  -2   0  -1  206.25    2.97
   2   0   1  201.06    2.91
   2   0   1  197.98    3.03
   2   0   1  205.34    2.92
   2   0   1  210.36    3.78
   2   0   1  210.22    3.75
  -3   0  -1   45.21    1.55
   3   0   1   52.36    1.68
   3   0   1   51.01    2.58
   3   0   1   44.83    1.67
   3   0   1   46.05    2.58
   3   0   1   44.86    1.45
  -4   0  -1   71.53    1.91
   4   0   1   76.46    3.01
   4   0   1   74.27    1.77
   4   0   1   75.59    2.20
   4   0   1   78.13    2.20
   4   0   1   76.84    3.22
   4   0   1   72.20    2.03
  -5   0  -1   55.99    1.93
   5   0   1   60.64    2.51
   5   0   1   61.07    2.47
   5   0   1   59.54    3.22
   5   0   1   59.43    2.05
   5   0   1   59.14    1.78
   6   0   1   -1.73    2.28
   6   0   1   -0.15    1.06
   6   0   1   -1.22    1.34
   6   0   1    0.09    1.38
   6   0   1    2.40    1.40
   7   0   1   21.14    3.01
   7   0   1   23.82    2.87
   7   0   1   24.16    1.97
   7   0   1   23.29    2.81
   7   0   1   22.29    1.57
   8   0   1   46.48    4.11
   8   0   1   44.90    1.81
   8   0   1   48.38    3.52
   8   0   1   49.47    1.82
   8   0   1   50.53    3.52
   9   0   1   14.77    1.27
   9   0   1   14.51    1.47
   9   0   1    9.69    3.48
   9   0   1   12.95    2.41
   9   0   1   14.06    2.39
  10   0   1    1.22    2.36
  10   0   1    1.16    2.30
  10   0   1   -0.66    3.34
  11   0   1   -0.32    3.51
  11   0   1    0.39    2.42
  11   0   1    0.51    2.53
  12   0   1    4.92    3.93
  12   0   1    0.13    2.78
  12   0   1    3.56    2.70
  13   0   1   -1.83    3.73
  13   0   1    7.21    2.89
  13   0   1   -3.48    2.83
  14   0   1   14.63    3.35
  14   0   1    1.31    3.29
  15   0   1   -3.28    3.43
  15  -1  -1   12.84    5.19
  15  -1  -1   -1.27    3.90
  14  -1  -1    2.33    3.50
  14  -1  -1    7.49    4.55
  13  -1  -1    8.11    3.08
  13  -1  -1   -5.86    3.01
  13  -1  -1    1.12    4.09
  12  -1  -1    1.94    3.04
  12  -1  -1    7.78    2.86
  12  -1  -1    4.86    3.76
  12  -1  -1    7.63    1.63
  11  -1  -1    6.10    2.63
  11  -1  -1    2.63    3.53
  11  -1  -1    4.54    1.74
  11  -1  -1    2.73    2.83
  10  -1  -1   -0.81    1.79
  10  -1  -1   -0.94    2.42
  10  -1  -1    1.67    2.63
  10  -1  -1   -1.20    3.32
   9  -1  -1    3.39    1.86
   9  -1  -1    3.77    2.35
   9  -1  -1    1.36    3.15
   9  -1  -1    5.00    2.47
   8  -1  -1   63.88    2.74
   8  -1  -1   68.54    4.32
   8  -1  -1   65.88    4.12
   8  -1  -1   68.89    4.23
   7  -1  -1   18.95    2.23
   7  -1  -1   22.37    1.95
   7  -1  -1   18.09    2.22
   7  -1  -1   21.69    3.02
   6  -1  -1  116.39    4.13
   6  -1  -1  112.09    3.15
   6  -1  -1  119.87    4.35
   6  -1  -1  116.52    4.16
  -6   1   1  109.84    3.04
   5  -1  -1  121.10    2.97
   5  -1  -1  129.08    4.22
   5  -1  -1  119.43    3.81
   5  -1  -1  121.64    3.85
  -5   1   1  121.47    3.04
  -5   1   1  113.11    2.98
   4  -1  -1    7.79    1.85
   4  -1  -1    4.42    1.37
   4  -1  -1    5.29    1.36
   4  -1  -1    5.98    1.39
  -4   1   1    5.45    1.45
  -4   1   1    3.82    1.18
   3  -1  -1  204.32    3.75
   3  -1  -1  206.61    4.38
   3  -1  -1  214.87    4.37
   3  -1  -1  213.17    4.50
  -3   1   1  197.19    3.72
  -3   1   1  206.01    3.84
   2  -1  -1   39.58    1.86
   2  -1  -1   42.16    1.96
   2  -1  -1   39.22    2.00
   2  -1  -1   39.21    1.60
  -2   1   1   36.06    1.62
  -2   1   1   40.15    1.55
   1  -1  -1   86.41    1.85
   1  -1  -1   88.25    1.85
   1  -1  -1   85.72    1.59
  -1   1   1   83.30    1.64
  -1   1   1   85.33    1.83
   0  -1  -1    1.53    0.34
   0   1   1    0.75    0.28
   1   1   1  211.10    3.24
   1   1   1  212.67    3.53
   2   1   1   65.28    1.13
   2   1   1   68.86    2.56
   2   1   1   67.26    2.18
  -3  -1  -1   62.20    1.52
   3   1   1   64.59    3.03
   3   1   1   59.93    1.53
   3   1   1   61.90    2.72
  -4  -1  -1   54.39    1.56
   4   1   1   54.09    3.26
   4   1   1   52.68    1.13
   4   1   1   52.95    1.12
   4   1   1   53.40    2.75
   4   1   1   52.81    1.59
   4   1   1   55.74    1.51
  -5  -1  -1   39.61    1.67
   5   1   1   46.24    2.02
   5   1   1   40.30    1.20
   5   1   1   46.97    2.04
   5   1   1   42.23    1.19
   5   1   1   40.22    2.99
   5   1   1   42.74    1.70
  -6  -1  -1   -0.65    1.15
   6   1   1   -2.61    2.23
   6   1   1   -1.14    0.72
   6   1   1   -0.75    1.22
   6   1   1    1.21    1.24
   6   1   1   -0.85    0.76
  -7  -1  -1    1.77    1.26
   7   1   1    1.31    0.71
   7   1   1    0.74    1.42
   7   1   1    2.51    1.45
   7   1   1   -0.68    2.49
   7   1   1    1.89    0.75
   8   1   1    7.49    0.69
   8   1   1    8.81    0.64
   8   1   1    3.81    2.90
   8   1   1    8.20    1.92
   8   1   1    5.75    1.80
   9   1   1   -2.69    3.09
   9   1   1   -1.16    1.91
   9   1   1    3.84    2.11
  10   1   1   28.46    4.33
  10   1   1   23.01    2.80
  10   1   1   24.08    2.87
  11   1   1    7.14    4.04
  11   1   1    2.04    2.49
  11   1   1    6.89    2.46
  12   1   1   -0.39    2.65
  12   1   1    4.48    2.53
  12   1   1    2.75    3.86
  13   1   1   16.83    3.11
  13   1   1   16.51    4.56
  13   1   1    9.10    3.23
  14   1   1   24.76    3.67
  14   1   1   23.63    5.07
  15   1   1   -4.22    3.28
  15  -2  -1    2.32    4.31
  15  -2  -1   -5.68    3.78
  14  -2  -1   -1.68    3.66
  14  -2  -1    3.23    4.07
  13  -2  -1    4.75    3.45
  13  -2  -1    5.88    3.94
  12  -2  -1   17.75    3.32
  12  -2  -1    7.25    3.34
  12  -2  -1    9.84    3.93
  12  -2  -1   12.16    2.04
  11  -2  -1    4.63    1.94
  11  -2  -1    5.57    3.90
  11  -2  -1    0.31    2.80
  11  -2  -1    8.04    2.81
  10  -2  -1   36.79    3.06
  10  -2  -1   38.59    4.79
  10  -2  -1   40.71    5.03
  10  -2  -1   41.57    4.96
   9  -2  -1   44.51    4.64
   9  -2  -1   47.47    2.96
   9  -2  -1   49.76    4.62
   9  -2  -1   47.21    4.61
   8  -2  -1    2.64    2.71
   8  -2  -1    4.41    1.81
   8  -2  -1    3.01    2.16
   8  -2  -1    4.16    2.25
   7  -2  -1   24.23    2.27
   7  -2  -1   20.46    2.45
   7  -2  -1   24.22    2.96
   7  -2  -1   22.26    2.49
  -7   2   1   24.54    2.29
   6  -2  -1    2.97    1.79
   6  -2  -1    4.92    2.28
   6  -2  -1    2.73    1.88
   6  -2  -1    4.28    1.67
  -6   2   1    3.92    1.78
   5  -2  -1    9.22    2.27
   5  -2  -1    5.89    1.76
   5  -2  -1    7.08    1.73
   5  -2  -1    5.85    1.68
  -5   2   1    9.48    1.78
   4  -2  -1    2.88    1.46
   4  -2  -1    1.63    1.75
   4  -2  -1    3.99    1.51
   4  -2  -1    1.35    1.45
  -4   2   1    2.38    1.43
   3  -2  -1  388.36    6.35
   3  -2  -1  386.61    6.69
   3  -2  -1  383.54    6.11
   3  -2  -1  383.00    6.70
  -3   2   1  371.69    6.22
   2  -2  -1  232.33    3.92
   2  -2  -1  217.02    4.33
   2  -2  -1  220.16    3.84
  -2   2   1  205.82    3.89
   1  -2  -1   25.17    1.10
   1  -2  -1   24.76    0.83
   1  -2  -1   24.57    1.42
  -1   2   1   27.01    1.17
  -1   2   1   25.04    1.48
   0  -2  -1  122.67    2.01
   0   2   1  119.22    2.10
   0   2   1  123.42    2.25
   0   2   1  124.82    2.26
   0   2   1  124.48    2.24
  -1  -2  -1   23.18    0.68
   1   2   1   22.44    0.77
   1   2   1   22.16    1.04
   1   2   1   23.81    1.56
   1   2   1   23.40    0.66
   2   2   1    6.02    1.71
   2   2   1    4.59    1.50
   2   2   1    4.50    0.72
  -3  -2  -1   13.39    1.28
   3   2   1   11.07    1.80
   3   2   1   11.72    1.90
  -4  -2  -1   40.36    1.40
   4   2   1   43.24    2.59
   4   2   1   45.73    3.10
  -5  -2  -1   40.11    1.61
   5   2   1   41.40    1.67
   5   2   1   39.76    1.66
   5   2   1   46.73    3.44
   5   2   1   42.25    3.05
  -6  -2  -1   36.62    1.81
   6   2   1   46.71    2.32
   6   2   1   37.11    2.14
   6   2   1   38.18    3.31
  -7  -2  -1   73.11    2.31
   7   2   1   76.65    4.14
   7   2   1   73.54    2.93
   7   2   1   79.60    3.11
  -8  -2  -1    2.06    1.37
   8   2   1    1.07    1.58
   8   2   1   -2.13    2.70
   8   2   1    2.20    1.68
  -9  -2  -1   24.86    2.12
   9   2   1   19.14    2.32
   9   2   1   19.58    3.97
   9   2   1   27.98    3.59
  10   2   1   21.03    2.59
  10   2   1   24.58    2.87
  10   2   1   20.99    4.14
  11   2   1    0.22    3.61
  11   2   1   -0.54    2.37
  11   2   1    1.61    2.18
  12   2   1   -0.75    3.57
  12   2   1    1.72    2.37
  12   2   1   -0.86    2.56
  13   2   1    3.90    4.26
  13   2   1    4.58    2.72
  13   2   1   -4.12    2.70
  14   2   1    8.77    4.43
  14   2   1   12.35    3.21
  15   2   1   14.92    3.51
  15   2   1   -1.94    3.35
  15  -3  -1   -2.58    4.06
  14  -3  -1   11.84    4.42
  14  -3  -1    2.61    3.82
  13  -3  -1   14.87    4.58
  13  -3  -1   22.51    2.28
  13  -3  -1   15.58    4.07
  12  -3  -1    7.83    4.11
  12  -3  -1   -0.07    3.21
  12  -3  -1    9.63    3.23
  12  -3  -1    5.92    2.05
  11  -3  -1    2.40    3.03
  11  -3  -1    3.27    3.74
  11  -3  -1    4.62    2.91
  11  -3  -1    0.12    2.01
  10  -3  -1    2.82    3.37
  10  -3  -1    3.37    2.79
  10  -3  -1    0.61    2.28
  10  -3  -1    0.40    2.81
   9  -3  -1    2.04    2.51
   9  -3  -1   -0.60    2.98
   9  -3  -1    2.06    2.24
   9  -3  -1    3.90    2.63
   8  -3  -1   -1.52    2.07
   8  -3  -1    1.63    2.68
   8  -3  -1    0.64    1.90
   8  -3  -1   -0.59    2.15
  -8   3   1    2.39    2.00
   7  -3  -1   31.26    2.56
   7  -3  -1   29.73    3.54
   7  -3  -1   34.18    3.36
   7  -3  -1   33.25    3.65
  -7   3   1   30.44    2.44
   6  -3  -1   79.22    3.09
   6  -3  -1   79.01    4.07
   6  -3  -1   84.56    3.68
   6  -3  -1   78.93    3.99
  -6   3   1   75.51    3.02
   5  -3  -1    0.39    1.61
   5  -3  -1    0.90    1.72
   5  -3  -1   -0.75    1.54
   5  -3  -1   -0.69    1.87
  -5   3   1   -0.79    1.84
   4  -3  -1  104.61    3.61
   4  -3  -1  105.63    3.33
   4  -3  -1  105.64    3.07
   4  -3  -1  104.97    3.77
  -4   3   1   98.67    2.92
   3  -3  -1   26.39    1.89
   3  -3  -1   21.83    2.27
   3  -3  -1   25.13    2.82
   3  -3  -1   27.45    2.69
  -3   3   1   23.11    2.33
   2  -3  -1  207.56    3.73
   2  -3  -1  206.01    4.02
   2  -3  -1  205.02    4.66
   2  -3  -1  209.93    4.65
  -2   3   1  199.32    4.15
   1  -3  -1   39.91    1.93
   1  -3  -1   39.93    1.02
   1  -3  -1   39.33    1.69
  -1   3   1   38.46    1.32
  -1   3   1   41.42    2.34
  -1   3   1   37.55    1.82
   0  -3  -1    0.54    0.80
   0   3   1    1.83    0.92
   0   3   1    1.79    0.86
   0   3   1    1.26    0.77
   0   3   1    1.86    1.12
  -1  -3  -1   16.01    1.01
   1   3   1   16.71    1.35
   1   3   1   17.62    1.26
   1   3   1   22.16    2.19
   1   3   1   17.53    1.24
   1   3   1   17.91    1.32
  -2  -3  -1   68.53    1.67
   2   3   1   85.66    3.59
   2   3   1   73.84    2.66
   2   3   1   69.20    1.32
   2   3   1   73.61    1.32
   2   3   1   68.59    1.79
  -3  -3  -1  370.38    5.12
   3   3   1  367.35    7.03
   3   3   1  369.17    6.32
   3   3   1  363.36    5.19
  -4  -3  -1   13.61    1.06
   4   3   1   14.51    2.09
   4   3   1   12.52    1.99
  -5  -3  -1   56.83    1.79
   5   3   1   61.55    1.56
   5   3   1   60.36    3.59
  -6  -3  -1   34.52    1.69
   6   3   1   37.79    1.97
   6   3   1   33.57    3.26
   6   3   1   32.88    1.89
  -7  -3  -1    9.51    1.36
   7   3   1    8.01    2.88
   7   3   1    8.96    1.47
   7   3   1    7.33    1.33
  -8  -3  -1    0.32    1.30
   8   3   1   -0.12    1.44
   8   3   1    2.36    1.67
   8   3   1   -0.93    2.79
  -9  -3  -1   -0.46    1.53
   9   3   1    1.92    1.96
   9   3   1   -1.38    3.15
   9   3   1    0.49    1.74
  10   3   1    4.79    2.07
  10   3   1    5.76    2.24
  10   3   1    6.71    3.87
  11   3   1    1.49    2.13
  11   3   1   -2.16    3.50
  11   3   1    0.04    2.40
  12   3   1   33.34    4.43
  12   3   1   21.63    4.46
  12   3   1   23.61    3.23
  13   3   1    2.96    4.06
  13   3   1    1.88    2.86
  14   3   1    5.47    4.39
  14   3   1    9.38    3.06
  15   3   1   -4.39    3.29
  15  -4  -1   -6.59    3.89
  14  -4  -1   -2.44    3.72
  13  -4  -1    7.31    4.31
  13  -4  -1    5.15    2.16
  13  -4  -1    4.29    3.61
  12  -4  -1   -0.23    3.41
  12  -4  -1   -3.32    3.13
  12  -4  -1    5.00    2.23
  11  -4  -1   43.12    4.71
  11  -4  -1   59.78    5.74
  11  -4  -1   45.82    3.40
  11  -4  -1   42.49    5.64
  10  -4  -1   23.57    3.67
  10  -4  -1   26.49    3.55
  10  -4  -1   31.34    3.06
  10  -4  -1   29.61    4.13
   9  -4  -1    1.22    3.29
   9  -4  -1    5.61    2.40
   9  -4  -1    4.98    2.81
   9  -4  -1    5.47    2.80
   8  -4  -1    1.10    2.61
   8  -4  -1    1.64    2.33
   8  -4  -1    1.25    2.24
   8  -4  -1   -0.07    2.20
  -8   4   1    2.03    2.15
   7  -4  -1   -0.04    1.93
   7  -4  -1   -2.26    2.36
   7  -4  -1   -0.01    2.14
   7  -4  -1   -1.91    1.72
  -7   4   1    0.56    2.00
   6  -4  -1    1.91    1.99
   6  -4  -1    0.88    1.87
   6  -4  -1    1.03    1.94
   6  -4  -1    1.27    2.04
  -6   4   1    1.68    1.83
   5  -4  -1    4.20    1.90
   5  -4  -1    1.38    1.96
   5  -4  -1    3.64    1.85
   5  -4  -1    2.39    1.86
  -5   4   1    4.14    2.07
   4  -4  -1   25.74    2.19
   4  -4  -1   25.82    2.04
   4  -4  -1   30.00    3.01
   4  -4  -1   28.54    2.67
  -4   4   1   25.13    2.20
   3  -4  -1    0.29    1.19
   3  -4  -1    0.36    1.58
   3  -4  -1    0.90    1.63
   3  -4  -1    1.11    1.53
  -3   4   1    1.25    1.73
   2  -4  -1   99.52    2.99
   2  -4  -1   96.07    2.31
   2  -4  -1  102.36    3.42
  -2   4   1   96.90    3.09
  -2   4   1  101.01    3.67
  -2   4   1   99.97    1.78
   1  -4  -1  646.03   10.10
   1  -4  -1  658.18    9.64
  -1   4   1  692.74    9.33
  -1   4   1  673.01   10.37
  -1   4   1  664.81    9.83
   0  -4  -1   13.30    1.64
   0   4   1   10.94    1.75
   0   4   1   11.04    0.68
   0   4   1   13.46    1.53
   0   4   1   14.14    1.97
   0   4   1   12.88    1.57
  -1  -4  -1  241.46    4.10
   1   4   1  248.75    4.27
   1   4   1  260.01    5.26
   1   4   1  251.74    4.05
   1   4   1  254.18    4.59
   1   4   1  254.74    4.40
  -2  -4  -1    4.34    1.16
   2   4   1    3.83    1.31
   2   4   1    2.83    0.86
   2   4   1    7.19    1.82
   2   4   1    3.85    1.27
   2   4   1    3.17    0.80
  -3  -4  -1    1.20    0.87
   3   4   1    0.91    0.46
   3   4   1   -0.11    1.45
   3   4   1    1.14    0.39
   3   4   1    1.19    0.38
   3   4   1    0.74    0.45
   3   4   1    2.25    1.76
   3   4   1    1.29    1.04
  -4  -4  -1    4.73    0.91
   4   4   1    3.26    1.79
   4   4   1    6.06    2.09
  -5  -4  -1   87.01    2.12
   5   4   1   89.97    1.89
   5   4   1   89.90    3.72
  -6  -4  -1   73.07    2.19
   6   4   1   75.52    2.23
   6   4   1   75.89    3.77
   6   4   1   76.14    2.34
  -7  -4  -1   12.68    1.43
   7   4   1   10.47    1.34
   7   4   1   10.60    2.82
   7   4   1   13.11    1.53
  -8  -4  -1   16.26    1.63
   8   4   1   19.48    3.35
   8   4   1   14.89    1.89
   8   4   1   14.37    1.69
  -9  -4  -1   17.33    2.16
   9   4   1   15.52    3.64
   9   4   1   13.99    2.03
   9   4   1   17.62    2.32
  10   4   1   -0.59    1.90
  10   4   1    0.51    2.11
  10   4   1    0.09    3.48
  11   4   1    3.84    3.83
  11   4   1    6.97    2.45
  11   4   1    6.89    2.23
  12   4   1    3.98    2.40
  12   4   1    3.09    3.63
  12   4   1   -0.91    2.58
  13   4   1   -2.71    2.70
  13   4   1    1.48    4.17
  13   4   1    4.21    2.61
  14   4   1    5.45    4.78
  14   4   1   -3.72    2.96
  15   4   1   -4.38    3.24
  15   4   1   16.72    3.57
  15  -5  -1   -3.29    4.15
  14  -5  -1    7.33    4.23
  13  -5  -1    2.29    2.32
  13  -5  -1    1.99    3.71
  13  -5  -1    3.30    3.74
  12  -5  -1   -0.05    3.53
  12  -5  -1    1.35    2.49
  12  -5  -1   -3.38    3.24
  11  -5  -1   -1.47    2.45
  11  -5  -1    4.73    3.03
  11  -5  -1   -1.88    3.53
  11  -5  -1   -3.09    3.09
  10  -5  -1    4.10    2.56
  10  -5  -1    3.02    2.93
  10  -5  -1   -0.23    3.00
  10  -5  -1    1.24    3.12
   9  -5  -1    1.67    2.49
   9  -5  -1   -0.31    3.13
   9  -5  -1    1.72    2.71
   9  -5  -1    1.84    2.84
   8  -5  -1   43.43    3.41
   8  -5  -1   43.48    4.56
   8  -5  -1   39.81    3.78
   8  -5  -1   51.41    4.67
  -8   5   1   43.44    3.28
   7  -5  -1   28.51    3.07
   7  -5  -1   29.64    2.78
   7  -5  -1   29.69    3.96
   7  -5  -1   31.00    3.98
  -7   5   1   28.33    2.58
   6  -5  -1   88.99    4.37
   6  -5  -1   91.50    3.83
   6  -5  -1   88.86    4.57
   6  -5  -1   87.41    3.34
  -6   5   1   88.90    3.60
   5  -5  -1   56.01    2.93
   5  -5  -1   55.21    2.80
   5  -5  -1   56.65    3.75
   5  -5  -1   54.52    3.69
  -5   5   1   52.94    2.88
   4  -5  -1   12.46    1.98
   4  -5  -1   14.47    2.24
   4  -5  -1   14.79    2.26
   4  -5  -1   14.91    1.79
  -4   5   1   16.33    2.21
  -4   5   1   13.24    0.81
   3  -5  -1   33.17    2.84
   3  -5  -1   34.43    2.32
   3  -5  -1   34.38    1.79
  -3   5   1   33.97    2.66
   2  -5  -1    5.61    1.56
   2  -5  -1    4.62    1.73
   2  -5  -1    4.10    0.92
  -2   5   1    5.54    1.76
  -2   5   1    4.77    0.69
  -2   5   1    4.28    1.92
   1  -5  -1  256.09    5.25
   1  -5  -1  263.11    4.86
  -1   5   1  250.64    5.07
  -1   5   1  258.60    5.56
  -1   5   1  266.79    4.50
   0  -5  -1   15.71    1.84
   0   5   1   21.98    2.51
   0   5   1   15.89    1.99
   0   5   1   14.93    0.74
   0   5   1   17.33    2.01
   0   5   1   16.37    1.69
  -1  -5  -1  169.09    3.31
   1   5   1  177.11    3.77
   1   5   1  176.46    3.09
   1   5   1  167.52    3.58
   1   5   1  171.76    3.95
   1   5   1  170.58    4.33
  -2  -5  -1   34.93    1.65
   2   5   1   36.40    1.88
   2   5   1   34.02    1.97
   2   5   1   39.95    3.05
   2   5   1   36.20    1.83
   2   5   1   33.46    1.94
  -3  -5  -1   65.11    1.80
   3   5   1   67.25    1.97
   3   5   1   63.29    1.45
   3   5   1   62.67    2.04
   3   5   1   66.48    1.90
   3   5   1   70.07    3.65
   3   5   1   62.12    2.50
   3   5   1   64.63    1.47
  -4  -5  -1   69.75    1.92
   4   5   1   73.50    1.93
   4   5   1   74.43    4.15
   4   5   1   70.45    2.13
   4   5   1   72.75    1.86
   4   5   1   69.92    3.27
  -5  -5  -1   56.66    1.86
   5   5   1   57.88    1.83
   5   5   1   54.66    3.24
  -6  -5  -1   16.38    1.39
   6   5   1   13.85    1.61
   6   5   1   11.37    2.57
  -7  -5  -1    0.84    1.28
   7   5   1    0.47    1.11
   7   5   1    0.81    1.34
   7   5   1    0.21    2.65
  -8  -5  -1    0.30    1.38
   8   5   1    0.12    1.38
   8   5   1    1.94    1.66
   8   5   1   -1.56    2.82
   9   5   1    0.52    1.67
   9   5   1    4.80    2.10
   9   5   1    1.11    3.36
  10   5   1   33.72    3.95
  10   5   1   35.21    4.55
  10   5   1   36.75    3.60
  11   5   1   30.25    4.44
  11   5   1   35.93    3.92
  11   5   1   27.45    3.00
  12   5   1    5.37    4.18
  12   5   1   10.37    2.62
  12   5   1    2.59    2.61
  13   5   1   13.99    2.98
  13   5   1    9.11    4.09
  13   5   1    2.86    2.98
  14   5   1   11.96    3.12
  14   5   1    5.03    4.35
  14   5   1    0.47    3.08
  15   5   1   -5.28    3.20
  15   5   1   10.21    3.37
  15   5   1    1.62    4.37
  15  -6  -1   -4.33    4.02
  14  -6  -1   -2.11    4.02
  14  -6  -1    5.92    2.53
  13  -6  -1   -2.21    3.69
  13  -6  -1    1.14    2.64
  12  -6  -1   17.51    2.98
  12  -6  -1   16.99    4.37
  12  -6  -1   12.89    3.99
  11  -6  -1   17.65    3.11
  11  -6  -1   18.20    3.88
  11  -6  -1   14.65    3.80
  10  -6  -1    2.86    3.12
  10  -6  -1    4.88    2.82
  10  -6  -1   11.17    3.27
  10  -6  -1    7.78    3.57
   9  -6  -1   68.87    5.66
   9  -6  -1   63.59    4.18
   9  -6  -1   64.77    4.94
   9  -6  -1   63.38    5.46
   8  -6  -1   -0.11    2.48
   8  -6  -1   -0.50    2.45
   8  -6  -1   -4.69    2.43
   8  -6  -1    2.97    2.72
  -8   6   1    4.67    2.67
   7  -6  -1   15.48    2.86
   7  -6  -1   14.04    2.68
   7  -6  -1   19.17    2.86
   7  -6  -1   15.48    2.76
  -7   6   1   15.09    2.80
   6  -6  -1    1.59    2.31
   6  -6  -1    3.15    2.16
   6  -6  -1    3.39    2.08
   6  -6  -1    5.62    2.35
  -6   6   1    5.35    2.22
   5  -6  -1   37.90    2.69
   5  -6  -1   38.18    2.86
   5  -6  -1   36.06    3.60
   5  -6  -1   40.43    3.44
  -5   6   1   32.32    3.12
   4  -6  -1   30.00    3.07
   4  -6  -1   29.97    2.65
   4  -6  -1   34.61    3.64
   4  -6  -1   30.19    2.26
  -4   6   1   31.49    3.05
   3  -6  -1  359.33    6.43
   3  -6  -1  356.10    7.22
   3  -6  -1  362.20    5.69
  -3   6   1  349.21    6.58
  -3   6   1  349.99    7.29
   2  -6  -1  206.10    4.42
   2  -6  -1  213.18    5.13
  -2   6   1  214.77    3.52
  -2   6   1  207.57    4.62
  -2   6   1  208.89    5.18
   1  -6  -1   27.09    2.20
   1  -6  -1   29.15    3.03
  -1   6   1   29.93    2.31
  -1   6   1   33.80    2.07
  -1   6   1   30.04    3.15
   0  -6  -1    3.14    1.61
   0   6   1    6.92    1.52
   0   6   1    4.10    1.78
   0   6   1    5.29    1.49
   0   6   1    6.13    1.75
   0   6   1    6.23    0.67
  -1  -6  -1  109.63    2.88
   1   6   1  112.99    2.36
   1   6   1  111.41    3.26
   1   6   1  111.40    3.08
   1   6   1  117.81    3.52
   1   6   1  118.49    4.00
  -2  -6  -1   16.29    1.64
   2   6   1   25.08    3.02
   2   6   1   17.66    1.85
   2   6   1   16.45    2.17
   2   6   1   17.54    1.71
   2   6   1   19.04    1.97
  -3  -6  -1   11.54    1.31
   3   6   1   10.34    1.04
   3   6   1    9.36    2.20
   3   6   1    8.57    1.14
   3   6   1    8.08    1.62
   3   6   1    8.92    1.23
   3   6   1   13.10    1.67
  -4  -6  -1   55.49    1.99
   4   6   1   54.27    2.10
   4   6   1   53.29    3.09
   4   6   1   52.98    1.21
   4   6   1   53.18    1.22
   4   6   1   55.51    2.25
   4   6   1   53.19    2.21
   4   6   1   61.40    4.21
  -5  -6  -1   20.98    1.63
   5   6   1   18.64    1.71
   5   6   1   19.99    2.50
  -6  -6  -1   22.70    1.69
   6   6   1   24.61    1.86
   6   6   1   25.23    2.84
  -7  -6  -1   58.94    2.23
   7   6   1   64.54    2.93
   7   6   1   65.13    2.69
   7   6   1   64.12    4.00
  -8  -6  -1   -1.68    1.41
   8   6   1   -1.97    1.39
   8   6   1   -0.67    2.91
   8   6   1    2.76    1.71
   9   6   1   50.71    3.85
   9   6   1   41.35    4.68
   9   6   1   48.04    3.37
  10   6   1    5.94    2.03
  10   6   1    7.45    3.46
  10   6   1    4.06    2.30
  11   6   1    1.23    2.42
  11   6   1    1.01    2.11
  11   6   1   -1.19    3.79
  12   6   1   -1.19    3.64
  12   6   1   -2.06    2.51
  12   6   1    3.13    2.35
  13   6   1   11.25    2.87
  13   6   1    5.82    4.08
  13   6   1    0.43    2.88
  14   6   1    5.21    4.40
  14   6   1   -1.08    3.21
  14   6   1    7.62    3.05
  15   6   1    8.39    3.29
  15   6   1   -0.77    4.48
  14  -7  -1   -2.93    3.96
  14  -7  -1    4.20    2.72
  13  -7  -1    7.83    2.93
  13  -7  -1    4.70    3.94
  12  -7  -1    1.38    3.63
  12  -7  -1    4.02    2.90
  11  -7  -1    1.75    2.77
  11  -7  -1   -1.90    3.13
  11  -7  -1   -1.16    3.19
  10  -7  -1    2.76    2.87
  10  -7  -1    0.71    3.33
  10  -7  -1    3.33    3.31
   9  -7  -1   42.52    4.32
   9  -7  -1   42.23    5.40
   9  -7  -1   38.38    3.85
   9  -7  -1   35.22    4.17
  -9   7   1   35.17    3.97
   8  -7  -1   -2.01    2.65
   8  -7  -1    2.72    2.92
   8  -7  -1   -0.92    2.53
   8  -7  -1    2.14    2.81
  -8   7   1    2.52    2.92
   7  -7  -1    9.23    2.85
   7  -7  -1    8.31    2.56
   7  -7  -1    9.34    2.33
   7  -7  -1    6.73    2.81
  -7   7   1   13.30    3.09
   6  -7  -1   56.87    3.97
   6  -7  -1   54.46    3.10
   6  -7  -1   58.41    4.55
   6  -7  -1   55.06    3.37
  -6   7   1   58.21    3.67
   5  -7  -1   41.02    3.53
   5  -7  -1   45.26    3.81
   5  -7  -1   41.49    3.48
   5  -7  -1   40.86    2.56
  -5   7   1   40.99    3.01
   4  -7  -1    4.63    2.48
   4  -7  -1    5.06    1.50
   4  -7  -1    4.18    1.95
  -4   7   1    5.78    2.65
   3  -7  -1  153.83    4.15
   3  -7  -1  158.04    4.88
  -3   7   1  146.29    4.27
  -3   7   1  148.22    4.86
   2  -7  -1   45.74    3.06
   2  -7  -1   51.02    2.39
  -2   7   1   48.44    3.13
  -2   7   1   48.50    3.62
   1  -7  -1   49.72    2.57
  -1   7   1   52.18    2.43
  -1   7   1   51.00    2.72
  -1   7   1   51.64    3.47
   0  -7  -1   38.32    2.26
   0   7   1   37.81    2.71
   0   7   1   41.01    2.56
   0   7   1   38.95    0.96
   0   7   1   41.87    2.73
   0   7   1   41.80    3.16
  -1  -7  -1   71.13    2.45
   1   7   1   77.90    3.38
   1   7   1   72.51    3.28
   1   7   1   75.26    1.94
   1   7   1   72.98    2.90
   1   7   1   82.76    3.05
  -2  -7  -1    4.08    1.42
   2   7   1    3.60    1.24
   2   7   1    4.03    1.48
   2   7   1    7.33    2.03
   2   7   1    5.29    1.31
   2   7   1    5.44    1.78
  -3  -7  -1  155.11    3.33
   3   7   1  163.27    3.62
   3   7   1  163.14    3.84
   3   7   1  159.28    3.97
   3   7   1  162.49    5.30
   3   7   1  154.87    3.83
  -4  -7  -1   72.29    2.35
   4   7   1   75.91    2.70
   4   7   1   71.70    1.68
   4   7   1   76.18    2.67
   4   7   1   75.44    2.81
   4   7   1   70.62    1.76
   4   7   1   72.31    3.30
  -5  -7  -1    1.38    1.24
   5   7   1   -0.58    1.95
   5   7   1    0.79    1.06
   5   7   1    2.80    1.61
  -6  -7  -1   28.58    1.89
   6   7   1   35.53    3.29
   6   7   1   29.72    2.17
  -7  -7  -1    6.49    1.44
   7   7   1    4.45    1.38
   7   7   1    4.83    2.60
  -8  -7  -1   -1.09    1.51
   8   7   1   -0.53    1.47
   8   7   1   -1.21    2.92
   8   7   1    1.83    1.88
   9   7   1   40.04    4.33
   9   7   1   41.28    3.94
   9   7   1   41.37    3.39
  10   7   1   48.96    5.51
  10   7   1   56.34    3.84
  10   7   1   53.02    4.20
  11   7   1    2.78    2.14
  11   7   1    8.59    4.00
  11   7   1    0.33    2.40
  12   7   1   13.36    2.65
  12   7   1    7.71    2.82
  12   7   1   14.35    4.19
  13   7   1    8.14    4.20
  13   7   1    3.51    2.95
  13   7   1   11.60    2.91
  14   7   1    7.85    3.05
  14   7   1   -6.02    3.02
  14   7   1   -0.29    4.14
  14  -8  -1   -2.82    4.06
  14  -8  -1    4.47    2.85
  13  -8  -1    8.29    4.20
  13  -8  -1   12.91    3.23
  12  -8  -1    7.54    3.13
  12  -8  -1   -2.81    3.40
  11  -8  -1   10.58    3.82
  11  -8  -1   15.10    3.30
  10  -8  -1   77.91    6.26
  10  -8  -1   63.57    4.64
   9  -8  -1    9.68    3.07
   9  -8  -1   10.14    3.04
   9  -8  -1    6.45    3.22
  -9   8   1   13.23    3.52
   8  -8  -1    0.35    2.74
   8  -8  -1    1.70    2.72
   8  -8  -1    1.83    3.01
   8  -8  -1   -1.14    2.60
  -8   8   1    4.01    3.16
   7  -8  -1   21.97    3.34
   7  -8  -1   12.99    2.92
   7  -8  -1   17.35    2.68
   7  -8  -1   13.02    2.86
  -7   8   1   15.88    3.33
   6  -8  -1   -0.54    2.37
   6  -8  -1    3.57    2.40
   6  -8  -1    0.14    1.77
   6  -8  -1   -1.78    2.16
  -6   8   1   -0.42    2.54
   5  -8  -1   21.39    2.81
   5  -8  -1   19.25    2.65
  -5   8   1   22.75    3.01
   4  -8  -1    8.87    2.20
   4  -8  -1    9.67    2.43
  -4   8   1   10.65    2.63
   3  -8  -1   30.81    3.00
   3  -8  -1   30.85    3.18
  -3   8   1   32.82    3.62
  -3   8   1   30.44    3.12
   2  -8  -1    0.32    1.67
   2  -8  -1   -1.59    1.97
  -2   8   1    0.95    2.04
  -2   8   1   -1.90    2.24
   1  -8  -1   77.95    3.12
  -1   8   1   72.93    4.07
  -1   8   1   76.51    3.34
   0  -8  -1   25.79    2.19
   0   8   1   25.66    2.71
   0   8   1   23.18    2.69
   0   8   1   20.89    0.82
   0   8   1   20.23    2.33
   0   8   1   27.05    2.75
  -1  -8  -1   24.64    2.12
   1   8   1   25.49    2.36
   1   8   1   29.36    3.17
   1   8   1   27.75    2.98
   1   8   1   23.93    1.44
   1   8   1   30.29    2.60
  -2  -8  -1    1.93    1.57
   2   8   1    1.40    1.38
   2   8   1    1.97    1.28
   2   8   1    1.58    1.99
   2   8   1    5.50    2.34
   2   8   1    3.05    1.73
  -3  -8  -1    0.41    1.51
   3   8   1   -0.11    1.54
   3   8   1    0.73    1.32
   3   8   1    0.13    1.53
   3   8   1   -1.20    1.93
  -4  -8  -1   32.13    2.12
   4   8   1   30.67    2.38
   4   8   1   33.95    2.76
   4   8   1   31.08    1.52
   4   8   1   33.10    2.42
  -5  -8  -1   14.69    1.64
   5   8   1   13.52    0.79
   5   8   1   15.96    2.34
   5   8   1   16.25    2.05
   5   8   1   17.00    2.16
   5   8   1   13.45    0.77
  -6  -8  -1   31.46    2.11
   6   8   1   32.98    2.46
   6   8   1   32.73    3.15
  -7  -8  -1   20.74    2.05
   7   8   1   21.38    2.52
   7   8   1   22.76    3.38
   8   8   1    7.82    1.80
   8   8   1    8.15    3.20
   8   8   1    7.79    2.13
   9   8   1   33.73    3.29
   9   8   1   37.50    3.82
   9   8   1   40.50    4.55
  10   8   1    1.32    3.32
  10   8   1    0.40    1.88
  10   8   1    2.01    2.30
  11   8   1    3.74    3.86
  11   8   1   -2.06    2.47
  11   8   1    1.15    2.09
  12   8   1    1.81    2.30
  12   8   1   -1.68    2.70
  12   8   1    0.22    3.63
  13   8   1    5.18    4.06
  13   8   1   -3.15    2.78
  13   8   1    2.65    2.60
  14   8   1   -4.02    2.99
  14   8   1    5.17    3.00
  14   8   1    3.43    4.34
  14  -9  -1    1.98    4.55
  14  -9  -1    8.54    3.21
  13  -9  -1   -0.47    4.10
  13  -9  -1    2.30    3.21
  12  -9  -1    0.97    3.69
  12  -9  -1    2.79    3.17
  11  -9  -1   -0.50    3.54
  11  -9  -1    3.39    3.12
  10  -9  -1    4.01    3.37
  10  -9  -1    3.05    3.42
   9  -9  -1    3.11    3.07
   9  -9  -1    5.65    3.11
  -9   9   1    5.21    3.40
   8  -9  -1   25.62    3.71
   8  -9  -1   29.63    3.68
  -8   9   1   31.80    4.12
   7  -9  -1   36.07    4.84
   7  -9  -1   35.67    3.61
   7  -9  -1   22.27    3.26
  -7   9   1   30.57    3.67
   6  -9  -1    1.42    2.60
   6  -9  -1    1.82    2.37
  -6   9   1    0.78    3.03
   5  -9  -1   69.19    4.53
   5  -9  -1   70.71    3.84
  -5   9   1   69.00    4.25
   4  -9  -1   -0.61    2.42
   4  -9  -1    0.51    1.99
  -4   9   1   -2.67    2.20
  -4   9   1   -1.65    2.50
   3  -9  -1   -0.27    1.83
   3  -9  -1   -0.01    2.37
  -3   9   1   -1.92    2.54
  -3   9   1   -0.35    2.31
   2  -9  -1  107.43    3.95
   2  -9  -1  106.86    4.27
  -2   9   1  106.63    4.98
  -2   9   1  107.85    4.13
   1  -9  -1   54.96    3.10
  -1   9   1   52.82    4.17
  -1   9   1   49.06    3.30
   0  -9  -1    3.86    1.98
   0   9   1    6.15    0.59
   0   9   1    5.30    2.19
   0   9   1    3.05    1.80
   0   9   1    4.09    2.37
  -1  -9  -1   48.89    2.95
   1   9   1   49.69    1.78
   1   9   1   54.03    3.74
   1   9   1   48.32    3.22
   1   9   1   50.55    3.30
  -2  -9  -1   57.32    2.55
   2   9   1   56.54    3.20
   2   9   1   59.90    2.30
   2   9   1   57.35    3.15
   2   9   1   56.63    3.67
  -3  -9  -1   25.79    2.16
   3   9   1   21.68    2.02
   3   9   1   17.54    1.93
   3   9   1   23.22    2.56
   3   9   1   23.20    3.05
  -4  -9  -1   18.52    1.85
   4   9   1   18.72    2.19
   4   9   1   16.59    1.40
   4   9   1   17.93    2.44
   4   9   1   17.29    2.31
  -5  -9  -1   10.11    1.69
   5   9   1   12.32    2.41
   5   9   1   10.77    1.11
   5   9   1    8.46    1.54
   5   9   1   12.09    1.09
   5   9   1    9.85    2.10
  -6  -9  -1    0.05    1.52
   6   9   1   -0.26    1.39
   6   9   1   -4.36    2.09
  -7  -9  -1   -1.09    1.61
   7   9   1   -0.25    2.48
   7   9   1   -0.78    1.52
   8   9   1    0.25    2.11
   8   9   1   -3.15    3.14
   8   9   1   -0.66    1.68
   9   9   1    1.34    3.15
   9   9   1    0.25    2.20
   9   9   1    1.09    1.79
  10   9   1    2.70    2.48
  10   9   1    6.49    3.53
  10   9   1    4.65    2.02
  11   9   1    5.65    3.63
  11   9   1    3.19    2.59
  11   9   1    6.02    2.25
  12   9   1   10.86    4.33
  12   9   1   11.02    2.63
  12   9   1    4.23    2.86
  13   9   1    3.89    2.67
  13   9   1   -3.81    2.88
  13   9   1   -2.58    4.05
  14   9   1    5.78    3.05
  14   9   1   -3.11    3.05
  14   9   1    2.55    4.28
  14 -10  -1   10.91    3.49
  14 -10  -1   10.91    4.88
  13 -10  -1    1.98    3.43
  13 -10  -1   -1.22    4.12
  12 -10  -1   12.41    3.58
  12 -10  -1    9.51    4.06
  11 -10  -1   10.47    4.07
  11 -10  -1   13.42    3.66
  10 -10  -1   -0.02    3.33
  10 -10  -1    2.47    3.11
   9 -10  -1    4.74    3.28
   9 -10  -1    8.09    3.30
  -9  10   1    6.55    3.58
   8 -10  -1   -3.11    3.11
   8 -10  -1    2.10    2.98
  -8  10   1    3.72    3.27
   7 -10  -1   -1.81    2.49
   7 -10  -1   -0.92    3.00
  -7  10   1   -1.14    3.08
   6 -10  -1   -0.17    2.85
   6 -10  -1    0.79    2.35
  -6  10   1   -1.15    2.88
   5 -10  -1   18.77    2.78
   5 -10  -1   24.56    3.22
  -5  10   1   30.77    3.60
   4 -10  -1    4.37    2.14
   4 -10  -1    6.92    2.65
  -4  10   1    6.14    2.83
   3 -10  -1   40.98    3.42
   3 -10  -1   39.84    3.73
  -3  10   1   40.44    3.48
  -3  10   1   36.24    4.23
   2 -10  -1  262.51    5.93
   2 -10  -1  254.81    6.51
  -2  10   1  259.07    6.19
  -2  10   1  254.69    6.91
   1 -10  -1   45.66    3.13
  -1  10   1   40.06    3.90
  -1  10   1   42.04    3.33
   0 -10  -1   40.04    2.95
   0  10   1   37.79    4.07
   0  10   1   42.39    1.01
   0  10   1   43.13    3.56
   0  10   1   38.69    3.18
  -1 -10  -1   13.10    2.17
   1  10   1   13.86    2.37
   1  10   1   12.75    1.37
   1  10   1   12.82    2.53
   1  10   1   13.33    2.13
  -2 -10  -1    6.15    1.79
   2  10   1    5.39    2.44
   2  10   1    4.63    1.71
   2  10   1    3.43    2.00
   2  10   1    6.71    1.37
  -3 -10  -1    4.04    1.78
   3  10   1    1.99    2.22
   3  10   1    1.68    1.52
   3  10   1    2.34    1.57
   3  10   1    2.06    1.80
  -4 -10  -1   13.40    1.94
   4  10   1   13.57    2.09
   4  10   1    9.90    1.79
   4  10   1   13.53    2.40
  -5 -10  -1   37.29    2.38
   5  10   1   32.00    1.61
   5  10   1   39.14    3.16
   5  10   1   38.02    3.03
   5  10   1   33.09    2.88
   5  10   1   37.74    2.34
  -6 -10  -1    2.11    1.71
   6  10   1    0.50    1.57
   6  10   1    2.68    2.52
   6  10   1    1.47    2.19
  -7 -10  -1   38.36    2.64
   7  10   1   36.27    3.72
   7  10   1   38.13    3.26
   8  10   1   12.97    3.29
   8  10   1   12.11    2.11
   8  10   1   12.89    2.53
   9  10   1    1.83    1.93
   9  10   1    3.78    3.48
   9  10   1    4.38    2.40
  10  10   1    3.30    2.49
  10  10   1    6.41    3.46
  10  10   1    5.47    2.13
  11  10   1   -1.83    3.45
  11  10   1   -0.31    2.65
  11  10   1    2.23    2.18
  12  10   1    3.01    3.70
  12  10   1    1.21    2.36
  12  10   1   -4.61    2.79
  13  10   1    3.53    2.74
  13  10   1   -2.58    3.10
  13  10   1    4.12    4.38
  14  10   1   -1.91    4.55
  14  10   1    6.33    3.14
  14  10   1   -3.43    3.20
  14 -11  -1    6.13    3.52
  14 -11  -1   -2.67    7.17
  13 -11  -1    1.96    4.17
  13 -11  -1    5.39    3.57
  12 -11  -1   -2.00    3.27
  12 -11  -1   -0.84    3.96
  11 -11  -1   -0.74    3.75
  11 -11  -1   -0.52    3.52
  10 -11  -1    0.92    3.23
  10 -11  -1    0.74    3.35
   9 -11  -1    9.20    3.66
   9 -11  -1   13.76    3.63
  -9  11   1   17.35    4.16
   8 -11  -1    9.97    3.55
   8 -11  -1    7.47    3.37
  -8  11   1   14.89    3.75
   7 -11  -1    0.03    2.78
   7 -11  -1   -2.31    3.67
  -7  11   1    4.48    3.90
   6 -11  -1   30.58    3.68
   6 -11  -1   42.07    4.04
  -6  11   1   43.71    4.27
   5 -11  -1   10.70    2.72
   5 -11  -1   10.05    3.08
  -5  11   1   13.46    3.34
   4 -11  -1   -1.43    2.63
   4 -11  -1    1.42    2.19
  -4  11   1   -2.60    2.78
   3 -11  -1   18.16    2.96
   3 -11  -1   15.23    2.57
  -3  11   1   11.86    2.80
  -3  11   1   21.18    3.33
   2 -11  -1   12.63    2.74
  -2  11   1   13.74    2.80
  -2  11   1   12.48    3.05
   1 -11  -1   19.48    2.69
  -1  11   1   17.27    2.85
  -1  11   1   21.45    3.45
   0 -11  -1   84.30    3.60
   0  11   1   89.13    4.88
   0  11   1   92.98    4.40
   0  11   1   89.77    4.29
  -1 -11  -1   45.02    2.87
   1  11   1   42.92    3.56
   1  11   1   46.71    1.66
   1  11   1   44.86    4.04
   1  11   1   51.20    3.63
  -2 -11  -1    0.45    1.95
   2  11   1    2.05    2.52
   2  11   1    1.88    2.05
   2  11   1    0.36    1.67
   2  11   1    2.11    1.25
  -3 -11  -1   27.46    2.45
   3  11   1   22.69    2.24
   3  11   1   25.78    3.06
   3  11   1   28.31    3.05
  -4 -11  -1   82.54    3.18
   4  11   1   87.27    3.64
   4  11   1   89.61    3.94
   4  11   1   83.27    3.44
  -5 -11  -1    1.62    1.80
   5  11   1    3.70    2.46
   5  11   1    2.68    2.05
   5  11   1    4.59    1.27
   5  11   1    3.01    1.74
  -6 -11  -1    1.31    1.88
   6  11   1    3.02    2.44
   6  11   1    0.51    2.51
   6  11   1    1.23    1.76
   6  11   1    2.36    0.62
   6  11   1    1.95    0.69
  -7 -11  -1    0.24    1.89
   7  11   1    0.35    2.75
   7  11   1    0.53    1.84
   8  11   1    0.52    3.07
   8  11   1    1.16    1.83
   9  11   1   12.57    3.42
   9  11   1   10.29    2.19
   9  11   1    9.94    2.66
  10  11   1   20.55    4.15
  10  11   1   14.54    2.85
  10  11   1   16.76    2.57
  11  11   1    6.05    3.90
  11  11   1    4.53    2.87
  11  11   1    6.06    2.38
  12  11   1    1.05    2.89
  12  11   1    7.53    2.63
  12  11   1   12.23    4.12
  13  11   1   11.14    4.33
  13  11   1    1.73    3.28
  13  11   1    8.67    2.94
  13 -12  -1   13.68    4.07
  12 -12  -1   11.85    4.07
  12 -12  -1    4.93    4.30
  11 -12  -1    5.53    3.48
  11 -12  -1    4.75    3.87
  10 -12  -1   31.50    4.46
  10 -12  -1   28.27    4.67
   9 -12  -1    7.28    3.56
   9 -12  -1    6.19    3.58
  -9  12   1    6.33    4.12
   8 -12  -1    6.86    3.38
   8 -12  -1    5.93    3.59
  -8  12   1   13.89    3.82
   7 -12  -1   -0.19    3.45
   7 -12  -1   -1.53    2.89
  -7  12   1    1.94    3.60
   6 -12  -1    0.52    3.32
   6 -12  -1   -1.06    2.68
  -6  12   1    2.87    3.62
   5 -12  -1    1.05    2.42
   5 -12  -1   -0.75    3.20
  -5  12   1   -0.45    3.27
   4 -12  -1   15.71    3.30
   4 -12  -1   15.34    2.85
  -4  12   1   15.45    3.65
   3 -12  -1  108.15    4.75
   3 -12  -1  101.09    5.09
  -3  12   1  102.76    4.81
   2 -12  -1    9.16    2.76
  -2  12   1    3.26    2.65
  -2  12   1    6.38    3.09
   1 -12  -1   19.40    2.87
  -1  12   1   16.14    3.01
  -1  12   1   15.80    3.20
   0 -12  -1   34.84    3.16
   0  12   1   30.84    3.41
   0  12   1   32.18    3.96
   0  12   1   32.03    3.67
  -1 -12  -1   14.21    2.36
   1  12   1   15.19    1.30
   1  12   1   14.18    2.86
   1  12   1   11.74    2.24
   1  12   1   14.44    2.75
  -2 -12  -1   -2.90    2.07
   2  12   1   -0.09    1.19
   2  12   1   -4.25    2.56
   2  12   1   -0.47    1.88
  -3 -12  -1   12.24    2.15
   3  12   1   12.41    2.23
   3  12   1   15.31    3.04
   3  12   1   15.66    1.86
  -4 -12  -1    3.59    2.05
   4  12   1    3.73    1.91
   4  12   1    5.36    1.97
   4  12   1    2.90    2.65
  -5 -12  -1   11.49    2.21
   5  12   1   13.37    1.57
   5  12   1   15.38    2.91
   5  12   1   14.10    2.41
   5  12   1   13.26    2.29
  -6 -12  -1   31.13    2.76
   6  12   1   30.48    3.54
   6  12   1   32.25    1.50
   6  12   1   32.35    3.67
   6  12   1   36.48    3.45
   6  12   1   34.14    1.49
   7  12   1    8.27    2.21
   7  12   1   14.38    3.24
   8  12   1    6.69    3.01
   8  12   1    6.80    2.12
   9  12   1   10.24    2.81
   9  12   1   12.63    3.79
   9  12   1   13.39    2.38
  10  12   1   12.06    3.63
  10  12   1    5.70    2.84
  10  12   1    7.91    2.32
  11  12   1   -1.98    2.78
  11  12   1    4.96    2.41
  11  12   1    3.08    3.58
  12  12   1    3.11    4.09
  12  12   1    2.94    2.54
  12  12   1    0.28    2.99
  13  12   1    8.59    3.01
  13  12   1    6.30    3.49
  13  12   1   11.01    4.68
  13 -13  -1    6.60    4.04
  12 -13  -1   -0.11    3.79
  11 -13  -1    1.90    3.91
  10 -13  -1   18.45    4.40
  10 -13  -1   15.97    6.41
   9 -13  -1    4.89    3.60
   9 -13  -1    2.30    3.45
  -9  13   1    6.35    4.70
   8 -13  -1   12.89    3.75
   8 -13  -1    9.68    3.77
  -8  13   1   14.78    3.99
   7 -13  -1   24.91    3.92
   7 -13  -1   29.76    4.38
  -7  13   1   32.52    4.66
   6 -13  -1    7.96    3.84
   6 -13  -1   12.30    3.24
  -6  13   1   14.27    4.09
   5 -13  -1    2.49    3.84
   5 -13  -1    7.94    2.88
  -5  13   1    8.83    4.28
   4 -13  -1   12.91    3.47
   4 -13  -1    9.99    2.78
  -4  13   1   14.65    3.75
   3 -13  -1    0.42    2.18
   3 -13  -1    0.32    2.89
  -3  13   1   -0.75    3.18
   2 -13  -1    1.03    2.77
  -2  13   1    0.85    3.15
   1 -13  -1   -3.92    2.75
  -1  13   1   -1.10    2.93
   0 -13  -1    1.87    2.68
   0  13   1    3.05    2.21
   0  13   1    1.33    3.25
  -1 -13  -1    5.91    2.37
   1  13   1    6.97    2.23
   1  13   1    9.71    1.07
   1  13   1    7.06    3.00
  -2 -13  -1   35.62    3.40
   2  13   1   37.09    3.79
   2  13   1   36.39    3.75
   2  13   1   33.21    1.99
  -3 -13  -1   27.25    2.85
   3  13   1   22.49    2.71
   3  13   1   31.12    3.52
   3  13   1   24.53    2.36
  -4 -13  -1    1.81    1.96
   4  13   1   -0.08    1.84
   4  13   1    0.06    1.99
   4  13   1   -0.68    2.86
  -5 -13  -1   14.35    2.46
   5  13   1   16.32    1.82
   5  13   1   12.44    2.38
   5  13   1   13.27    3.16
   5  13   1   17.60    2.65
  -6 -13  -1   19.36    2.59
   6  13   1   15.95    2.96
   6  13   1   15.64    3.20
   6  13   1   16.28    1.40
   6  13   1   14.82    2.58
   7  13   1    1.34    2.01
   7  13   1    2.49    2.87
   8  13   1   14.03    3.32
   8  13   1   16.33    2.57
   9  13   1    8.46    2.32
   9  13   1    6.84    2.90
   9  13   1   10.97    3.58
  10  13   1   -1.99    2.80
  10  13   1    3.37    3.34
  10  13   1    3.45    2.29
  11  13   1   -0.53    2.90
  11  13   1    0.58    2.38
  11  13   1    1.75    3.88
  12  13   1   11.22    4.15
  12  13   1   14.37    3.02
  12  13   1    6.68    3.29
  13  13   1    5.28    4.15
  13  13   1    5.77    2.98
  13 -14  -1    7.02    4.28
  12 -14  -1    2.73    3.77
  11 -14  -1   16.92    4.52
  10 -14  -1    8.45    4.34
   9 -14  -1   10.88    3.93
  -9  14   1   12.19    7.33
   8 -14  -1   -0.03    4.13
  -8  14   1   15.49    4.12
   7 -14  -1    0.37    3.63
  -7  14   1    6.97    3.92
   6 -14  -1    0.46    3.68
  -6  14   1    3.47    3.79
   5 -14  -1   37.74    6.44
   5 -14  -1   46.56    4.77
  -5  14   1   48.94    5.10
   4 -14  -1   15.49    3.81
   4 -14  -1   14.80    4.40
  -4  14   1   14.49    4.08
   3 -14  -1   15.20    3.61
  -3  14   1   14.18    3.91
   2 -14  -1   40.96    4.13
  -2  14   1   40.57    4.35
   1 -14  -1    7.94    3.01
  -1  14   1    8.49    3.50
   0 -14  -1    3.84    2.65
   0  14   1    2.64    3.24
   0  14   1    0.42    2.24
  -1 -14  -1    0.71    2.39
   1  14   1    2.98    3.44
   1  14   1    0.74    0.87
   1  14   1    0.63    2.23
  -2 -14  -1    7.44    2.75
   2  14   1    5.17    2.36
   2  14   1    5.81    1.35
   2  14   1    5.61    3.11
  -3 -14  -1    2.40    2.56
   3  14   1    0.36    2.78
   3  14   1   -0.67    2.11
   3  14   1    2.54    1.61
  -4 -14  -1   37.14    3.53
   4  14   1   37.02    3.95
   4  14   1   44.58    4.31
   4  14   1   37.85    2.97
  -5 -14  -1   41.42    3.46
   5  14   1   50.28    4.35
   5  14   1   47.01    3.99
   5  14   1   45.90    2.67
   5  14   1   48.69    3.59
  -6 -14  -1   -0.49    2.33
   6  14   1    0.42    1.32
   6  14   1   -1.09    2.44
   6  14   1   -1.38    2.83
   6  14   1    1.19    2.18
   7  14   1    8.01    3.00
   7  14   1    6.13    2.96
   7  14   1    8.12    2.44
   8  14   1   18.69    2.76
   8  14   1   20.43    3.53
   9  14   1    1.29    2.27
   9  14   1    1.37    2.89
   9  14   1    4.35    3.28
  10  14   1    3.02    3.55
  10  14   1    1.13    3.00
  10  14   1    0.78    2.32
  11  14   1    1.08    2.45
  11  14   1   -1.44    3.50
  11  14   1   -1.51    2.97
  12  14   1    6.35    3.81
  12  14   1    0.30    2.67
  12  14   1   -3.33    3.24
  12 -15  -1    1.46    4.47
  11 -15  -1    5.11    4.44
  10 -15  -1    2.98    4.34
   9 -15  -1   31.77    4.72
   8 -15  -1    7.75    4.39
  -8  15   1    9.70    4.66
   7 -15  -1    5.71    4.30
  -7  15   1    5.87    4.44
   6 -15  -1   22.80    4.27
  -6  15   1   26.93    4.64
   5 -15  -1   -5.56    3.64
  -5  15   1   -0.17    3.81
   4 -15  -1    4.21    3.75
  -4  15   1   -2.46    3.71
   3 -15  -1    1.07    3.33
  -3  15   1   -1.78    3.59
   2 -15  -1   10.11    3.42
  -2  15   1   17.11    4.02
   1 -15  -1    4.56    3.34
  -1  15   1    3.06    3.52
   0 -15  -1   23.76    3.33
   0  15   1   21.52    3.14
   0  15   1   24.82    4.45
  -1 -15  -1   69.17    4.10
   1  15   1   75.04    4.98
   1  15   1   72.75    4.62
  -2 -15  -1   18.84    3.27
   2  15   1   17.61    1.87
   2  15   1   17.82    3.12
   2  15   1   22.30    3.82
  -3 -15  -1   16.01    3.10
   3  15   1   13.09    2.85
   3  15   1   15.20    1.96
   3  15   1   14.96    3.77
  -4 -15  -1    1.59    2.40
   4  15   1   -0.58    3.31
   4  15   1    0.45    2.35
   4  15   1    3.60    2.03
  -5 -15  -1    9.52    2.71
   5  15   1    5.76    2.47
   5  15   1   11.04    2.47
   5  15   1   11.06    3.36
  -6 -15  -1    2.51    2.42
   6  15   1    2.24    1.47
   6  15   1    1.35    3.12
   6  15   1    1.98    2.33
   6  15   1    2.97    2.49
   7  15   1    1.21    2.26
   7  15   1   -0.13    3.05
   7  15   1    1.72    2.65
   8  15   1    1.70    2.33
   8  15   1    4.20    2.96
   9  15   1    3.04    2.39
   9  15   1   -1.22    2.95
   9  15   1    2.96    3.17
  10  15   1   14.67    2.95
  10  15   1   15.18    4.02
  10  15   1    9.82    3.34
  11  15   1    6.68    3.67
  11  15   1    3.05    3.32
  11  15   1    1.95    2.68
  12  15   1    2.49    2.85
  12  15   1   -1.75    3.45
  12  15   1    3.69    4.28
  12 -16  -1    2.94    4.79
  11 -16  -1   -0.02    4.58
  10 -16  -1   15.37    4.94
   9 -16  -1    8.87    4.25
   8 -16  -1   -0.76    3.95
  -8  16   1    4.48    4.33
   7 -16  -1   -0.91    3.80
  -7  16   1    3.82    4.06
   6 -16  -1   27.26    4.56
  -6  16   1   29.36    4.92
   5 -16  -1   15.68    4.06
  -5  16   1   16.52    4.42
   4 -16  -1   11.68    3.91
  -4  16   1   11.18    4.24
   3 -16  -1   45.17    4.72
  -3  16   1   45.92    5.17
   2 -16  -1   36.58    4.24
  -2  16   1   36.13    4.79
   1 -16  -1   -1.94    3.18
  -1  16   1   -0.35    3.82
   0 -16  -1   14.28    3.31
   0  16   1   10.69    3.98
  -1 -16  -1   19.90    3.36
   1  16   1   14.62    3.93
   1  16   1   16.59    3.16
  -2 -16  -1   35.54    3.62
   2  16   1   30.41    1.94
   2  16   1   29.96    3.65
   2  16   1   28.69    4.16
  -3 -16  -1    0.78    2.94
   3  16   1    1.64    1.65
   3  16   1    0.14    2.50
   3  16   1    2.25    3.65
  -4 -16  -1   16.15    3.14
   4  16   1   15.39    3.44
   4  16   1   14.20    2.97
   4  16   1   19.00    2.37
  -5 -16  -1   -0.29    2.59
   5  16   1    1.78    2.16
   5  16   1    1.62    2.52
   5  16   1    1.53    3.16
   6  16   1   33.23    4.08
   6  16   1   32.07    2.35
   6  16   1   34.73    3.54
   6  16   1   34.08    4.50
   7  16   1   31.27    3.55
   7  16   1   30.68    3.47
   7  16   1   38.29    4.01
   8  16   1    1.26    2.45
   8  16   1    3.88    3.03
   9  16   1    4.93    2.66
   9  16   1    1.55    3.20
   9  16   1    7.91    3.44
  10  16   1    3.64    3.37
  10  16   1   17.04    4.03
  10  16   1    9.11    2.90
  11  16   1    2.82    2.77
  11  16   1   -0.23    3.42
  11  16   1   -3.07    3.32
  12  16   1    7.13    4.37
  12  16   1   -3.13    3.53
  12  16   1    6.39    3.06
  11 -17  -1   -2.28    4.70
  10 -17  -1    7.76    4.96
   9 -17  -1   12.82    4.47
   8 -17  -1    2.61    4.21
  -8  17   1    7.68    4.29
   7 -17  -1   40.35    5.11
  -7  17   1   37.91    5.34
   6 -17  -1   16.61    4.40
  -6  17   1   17.79    4.53
   5 -17  -1    6.36    4.03
  -5  17   1    7.24    4.25
   4 -17  -1   13.51    4.04
  -4  17   1   14.44    4.40
   3 -17  -1    2.52    3.56
  -3  17   1   -1.17    4.35
   2 -17  -1    3.67    3.56
  -2  17   1    1.15    3.85
   1 -17  -1   22.49    3.84
  -1  17   1   24.74    5.00
   0 -17  -1    2.49    3.24
   0  17   1    2.22    3.78
  -1 -17  -1    2.40    3.12
   1  17   1    5.11    4.26
  -2 -17  -1   30.58    3.65
   2  17   1   35.01    4.66
   2  17   1   27.26    5.09
  -3 -17  -1   34.41    3.80
   3  17   1   27.16    3.63
   3  17   1   29.47    2.43
   3  17   1   36.85    4.72
  -4 -17  -1   18.07    3.28
   4  17   1   16.91    2.23
   4  17   1   13.14    3.05
   4  17   1   22.23    4.20
  -5 -17  -1    0.70    2.67
   5  17   1    0.86    2.60
   5  17   1    6.11    3.62
   5  17   1    5.39    2.26
   6  17   1    1.65    2.40
   6  17   1   -3.67    3.40
   6  17   1    3.49    1.74
   6  17   1    0.97    2.61
   7  17   1    1.39    3.39
   7  17   1    1.97    2.58
   7  17   1    4.38    2.83
   8  17   1    3.27    3.05
   8  17   1    3.74    2.57
   9  17   1    9.73    2.91
   9  17   1   14.96    3.72
   9  17   1    2.17    3.40
  10  17   1    6.81    2.99
  10  17   1    1.68    3.51
  10  17   1   13.55    3.84
  11  17   1    1.93    2.90
  11  17   1   -3.84    3.53
  11  17   1    4.82    3.86
  11 -18  -1   18.11    4.99
  10 -18  -1    7.55    5.15
   9 -18  -1    2.82    4.30
   8 -18  -1    1.56    4.28
  -8  18   1    7.04    4.39
   7 -18  -1    1.95    4.18
  -7  18   1   -4.94    4.04
   6 -18  -1    0.04    4.07
  -6  18   1    2.88    4.28
   5 -18  -1    4.49    4.07
  -5  18   1    9.35    4.93
   4 -18  -1   14.01    4.14
  -4  18   1   19.09    5.16
   3 -18  -1   -0.68    3.64
  -3  18   1    2.19    4.15
   2 -18  -1   22.14    3.98
  -2  18   1   24.36    4.72
   1 -18  -1   21.15    3.88
  -1  18   1   20.70    4.53
   0 -18  -1   17.09    3.62
   0  18   1   17.58    4.78
  -1 -18  -1    2.53    3.52
   1  18   1    4.11    3.85
  -2 -18  -1    1.77    2.93
   2  18   1    1.10    4.14
  -3 -18  -1   -0.70    3.10
   3  18   1    0.04    3.83
  -4 -18  -1    4.59    2.78
   4  18   1    8.18    2.13
   4  18   1    2.92    3.85
  -5 -18  -1   16.33    3.39
   5  18   1   17.97    4.16
   5  18   1   19.70    3.48
   5  18   1   23.18    2.69
   6  18   1    8.22    1.96
   6  18   1    6.71    2.92
   6  18   1   11.30    2.67
   6  18   1    4.70    3.61
   7  18   1    0.58    2.55
   7  18   1   -0.17    2.63
   7  18   1   -0.21    3.55
   8  18   1    9.36    3.20
   8  18   1    3.58    2.76
   9  18   1    3.91    2.80
   9  18   1   -0.70    3.58
   9  18   1    5.85    3.32
  10  18   1    4.24    3.54
  10  18   1    2.87    2.93
  10  18   1   -1.54    3.64
  11  18   1    6.48    4.01
  11  18   1    0.79    3.10
  11  18   1   -4.69    3.71
  10 -19  -1   -3.17    5.06
   9 -19  -1    1.22    4.61
   8 -19  -1    5.32    4.50
  -8  19   1    6.82    4.54
   7 -19  -1   -3.10    4.70
  -7  19   1    1.01    4.93
   6 -19  -1    0.06    4.20
  -6  19   1    1.11    4.39
   5 -19  -1   -2.43    3.90
  -5  19   1    0.89    4.39
   4 -19  -1    2.93    3.92
  -4  19   1    3.25    4.39
   3 -19  -1    6.70    3.92
  -3  19   1    1.63    4.15
   2 -19  -1    2.51    3.72
  -2  19   1   -1.49    4.06
   1 -19  -1    8.18    3.71
  -1  19   1    9.19    4.13
   0 -19  -1    2.24    3.35
   0  19   1   -1.91    3.95
  -1 -19  -1   16.82    3.67
   1  19   1   11.80    4.25
  -2 -19  -1    4.63    3.18
   2  19   1   10.29    4.51
  -3 -19  -1    3.29    3.32
   3  19   1    0.51    3.99
  -4 -19  -1    2.39    2.88
   4  19   1   -1.08    4.02
  -5 -19  -1    3.75    3.50
   5  19   1    4.20    4.03
   6  19   1    0.41    1.90
   6  19   1    0.01    2.48
   6  19   1    1.03    3.73
   7  19   1    7.21    2.84
   7  19   1   -0.10    3.82
   8  19   1    8.46    3.16
   9  19   1   -0.48    3.77
   9  19   1    5.96    3.39
  10  19   1    4.98    3.69
  10  19   1   -1.44    3.84
  10 -20  -1   11.82    5.09
   9 -20  -1    3.27    5.53
   8 -20  -1   -1.33    5.18
  -8  20   1    2.06    5.27
   7 -20  -1    0.51    4.40
  -7  20   1   -1.19    4.60
   6 -20  -1   22.37    5.02
  -6  20   1   20.15    5.04
   5 -20  -1   21.28    4.91
  -5  20   1   26.67    5.35
   4 -20  -1    0.73    4.08
  -4  20   1   -3.39    4.29
   3 -20  -1   21.76    4.46
  -3  20   1   21.23    4.98
   2 -20  -1   22.33    4.33
  -2  20   1   24.08    5.37
   1 -20  -1    5.79    4.20
  -1  20   1    1.81    4.31
   0 -20  -1   -0.30    3.52
   0  20   1    0.41    4.10
  -1 -20  -1   -2.03    3.28
   1  20   1   -3.17    3.88
  -2 -20  -1   -1.20    3.53
   2  20   1    4.13    4.31
  -3 -20  -1    7.47    3.63
   3  20   1    4.62    4.51
  -4 -20  -1   24.62    3.68
   4  20   1   18.01    4.56
   5  20   1    0.62    3.98
   6  20   1    3.64    2.06
   6  20   1    2.80    4.11
   7  20   1   13.81    4.13
   9  20   1    1.02    4.04
   9 -21  -1   16.88    5.46
   8 -21  -1   -0.99    4.87
  -8  21   1    6.63    5.12
   7 -21  -1    8.82    5.05
  -7  21   1   26.20    5.63
   6 -21  -1    4.45    4.63
  -6  21   1   13.63    5.63
   5 -21  -1    5.95    4.59
  -5  21   1    3.69    5.19
   4 -21  -1    8.84    4.92
  -4  21   1   13.81    5.03
   3 -21  -1   -0.50    4.06
  -3  21   1    2.41    4.58
   2 -21  -1    6.59    4.09
  -2  21   1    7.17    4.75
   1 -21  -1   11.00    4.02
  -1  21   1   18.51    5.02
   0 -21  -1   27.12    4.73
   0  21   1   29.06    5.57
  -1 -21  -1    4.06    3.56
   1  21   1    6.14    4.90
  -2 -21  -1    2.33    3.72
   2  21   1    2.18    4.06
  -3 -21  -1    2.07    3.67
   3  21   1    2.98    4.39
  -4 -21  -1    4.97    3.53
   4  21   1    2.93    4.31
   5  21   1   -2.87    3.92
   6  21   1    5.67    4.29
   6  21   1   -0.07    2.23
   7  21   1    5.18    4.15
   8  21   1   -0.52    4.21
   8 -22  -1   -0.39    5.10
  -8  22   1    3.19    5.29
   7 -22  -1    5.32    5.14
  -7  22   1    3.58    5.04
   6 -22  -1    8.05    5.02
  -6  22   1   11.22    5.40
   5 -22  -1    0.96    4.53
  -5  22   1    4.42    5.01
   4 -22  -1   10.37    4.72
  -4  22   1   11.15    5.20
   3 -22  -1   14.09    4.56
  -3  22   1   18.45    5.65
   2 -22  -1    0.18    4.09
  -2  22   1    3.23    4.55
   1 -22  -1    8.63    4.03
  -1  22   1   10.83    5.21
   0 -22  -1   15.15    4.19
   0  22   1   10.58    4.80
  -1 -22  -1    4.02    4.15
   1  22   1    1.22    4.34
  -2 -22  -1    4.64    3.60
   2  22   1    2.62    4.35
  -3 -22  -1    5.28    3.85
   3  22   1    3.67    4.18
  -4 -22  -1    1.27    3.66
   4  22   1    3.83    4.41
   5  22   1   13.43    4.74
   6  22   1   18.48    4.69
   7  22   1    0.88    4.48
   8  22   1   -5.07    4.25
   7 -23  -1   12.04    5.97
  -7  23   1    7.20    6.12
   6 -23  -1    3.56    5.01
  -6  23   1   -3.16    4.91
   5 -23  -1    2.41    4.88
  -5  23   1    1.13    5.18
   4 -23  -1    2.66    4.53
  -4  23   1    4.10    4.97
   3 -23  -1    0.02    4.33
  -3  23   1    3.15    4.96
   2 -23  -1   11.78    4.92
  -2  23   1    4.94    4.81
   1 -23  -1    9.46    4.19
  -1  23   1   14.54    5.14
   0 -23  -1    3.33    3.92
   0  23   1    2.50    4.62
  -1 -23  -1    5.26    3.90
   1  23   1    2.37    4.56
  -2 -23  -1   12.54    4.07
   2  23   1   17.98    5.40
  -3 -23  -1    8.10    4.12
   3  23   1    2.77    4.34
   4  23   1    3.36    4.78
   5  23   1   -0.97    4.62
   6  23   1   -1.47    4.50
   7  23   1   -1.32    4.38
   6 -24  -1    7.34    5.79
  -6  24   1    8.01    6.17
   5 -24  -1   13.47    5.81
  -5  24   1   18.09    6.48
   4 -24  -1    0.52    4.58
  -4  24   1    4.63    5.45
   3 -24  -1    2.44    4.59
  -3  24   1    4.41    5.21
   2 -24  -1   10.41    4.68
  -2  24   1   16.24    5.58
   1 -24  -1    5.46    4.33
  -1  24   1    5.33    5.01
   0 -24  -1   -0.60    4.46
   0  24   1   -0.97    5.20
  -1 -24  -1    2.45    3.94
   1  24   1    3.74    5.30
  -2 -24  -1    3.82    4.25
   2  24   1    8.04    5.44
  -3 -24  -1   -2.29    3.72
   3  24   1   -0.32    5.03
   4  24   1   10.28    5.28
   5  24   1    4.37    5.04
   4 -25  -1    7.41    5.19
  -4  25   1   -5.67    5.27
   3 -25  -1    2.87    5.27
  -3  25   1    7.96    6.04
   2 -25  -1    9.18    4.83
  -2  25   1   14.02    6.12
   1 -25  -1    2.73    4.38
  -1  25   1    3.41    5.75
   0 -25  -1    9.63    4.59
   0  25   1   10.31    5.28
  -1 -25  -1    9.62    4.81
   1  25   1    3.20    5.46
  -2 -25  -1    6.44    4.64
   2  25   1    5.57    5.03
  -3 -25  -1   -2.89    3.88
   3  25   1   -5.75    5.08
   4  25   1   -6.63    4.99
   1  26  -2    4.55    5.27
  -1 -26   2    3.87    4.48
   0  26  -2    4.35    5.23
   0 -26   2    1.41    4.70
  -1  26  -2    3.51    5.46
   1 -26   2    3.34    5.24
   2 -26   2    7.41    5.64
   4  25  -2   -0.69    5.31
   3  25  -2   13.94    5.89
  -3 -25   2    6.23    4.35
   2  25  -2   22.27    5.65
  -2 -25   2   12.87    4.55
   1  25  -2    4.13    5.07
  -1 -25   2    4.70    4.88
   0  25  -2    3.95    5.11
   0 -25   2    6.00    4.57
  -1  25  -2    3.08    5.57
   1 -25   2    9.78    5.24
  -2  25  -2    1.59    5.74
   2 -25   2   -0.28    4.42
  -3  25  -2   -1.34    5.16
   3 -25   2    2.70    5.28
  -4  25  -2    6.38    5.55
   4 -25   2    6.23    5.11
   6  24  -2   13.14    5.41
   6  24  -2    4.66    5.47
   6  24  -2   15.84    3.24
   5  24  -2   -0.80    4.91
   5  24  -2    4.63    5.13
   4  24  -2    3.20    5.32
  -4 -24   2    2.42    3.99
   3  24  -2    1.36    5.35
  -3 -24   2   -1.79    3.86
   2  24  -2    6.52    4.95
  -2 -24   2    5.39    4.04
   1  24  -2   -1.39    4.75
  -1 -24   2    0.69    4.48
   0  24  -2   17.34    5.49
   0 -24   2   16.07    4.63
  -1  24  -2   11.20    5.84
   1 -24   2   14.45    4.53
  -2  24  -2    4.39    5.74
   2 -24   2    0.34    4.32
  -3  24  -2   17.84    6.23
   3 -24   2   17.93    5.53
  -4  24  -2    7.03    5.50
   4 -24   2   -1.17    4.72
  -5  24  -2    0.62    5.26
   5 -24   2   -4.33    4.75
  -6  24  -2    3.39    5.39
   6 -24   2    4.64    5.06
   7  23  -2    0.14    4.93
   6  23  -2    0.18    4.86
   6  23  -2    3.31    4.68
   6  23  -2    7.89    2.88
   5  23  -2   -3.39    4.54
   5  23  -2   -4.38    4.56
   4  23  -2   13.51    5.21
  -4 -23   2   12.89    4.36
   3  23  -2    8.19    5.20
  -3 -23   2    7.90    4.39
   2  23  -2   -1.31    4.59
  -2 -23   2    5.03    3.92
   1  23  -2    1.41    4.58
  -1 -23   2    0.55    4.27
   0  23  -2    6.77    4.78
   0 -23   2    6.57    4.06
  -1  23  -2    2.91    5.27
   1 -23   2    5.79    4.20
  -2  23  -2    1.43    4.60
   2 -23   2    4.38    4.35
  -3  23  -2   15.52    5.65
   3 -23   2   16.50    4.84
  -4  23  -2    3.17    5.00
   4 -23   2   -2.95    4.38
  -5  23  -2    5.86    5.57
   5 -23   2    8.36    5.35
  -6  23  -2   16.12    6.06
   6 -23   2   10.87    5.03
  -7  23  -2   -2.00    5.09
   7 -23   2    2.56    5.07
   8  22  -2   -4.46    4.64
   7  22  -2    3.92    4.63
   6  22  -2    8.67    4.75
   6  22  -2    6.07    2.69
   6  22  -2    7.28    4.69
   5  22  -2    3.63    4.57
  -5 -22   2   -0.13    5.51
   4  22  -2    5.25    4.39
  -4 -22   2    6.52    4.00
   3  22  -2   -5.12    4.29
  -3 -22   2   -5.12    3.82
   2  22  -2   -0.71    4.18
  -2 -22   2    2.26    3.70
   1  22  -2   10.59    4.81
  -1 -22   2   12.11    4.47
   0  22  -2   16.50    5.02
   0 -22   2   11.49    4.14
  -1  22  -2    7.06    4.45
   1 -22   2    5.58    4.03
  -2  22  -2   15.64    5.02
   2 -22   2   25.84    4.87
  -3  22  -2    9.09    4.73
   3 -22   2   10.42    4.41
  -4  22  -2   -0.54    4.74
   4 -22   2    9.13    4.44
  -5  22  -2    3.47    5.36
   5 -22   2    5.36    5.20
  -6  22  -2   -0.17    5.43
   6 -22   2    5.40    5.23
  -7  22  -2    0.53    5.02
   7 -22   2    1.90    4.86
   8 -22   2    4.11    5.54
   9  21  -2   -0.18    4.62
   8  21  -2   -2.29    4.41
   7  21  -2    0.18    4.38
   6  21  -2   -0.65    2.44
   6  21  -2   -3.44    4.23
   6  21  -2   -0.24    4.18
   5  21  -2   15.44    4.64
  -5 -21   2   18.53    4.12
   4  21  -2    3.62    4.53
  -4 -21   2    3.77    3.44
   3  21  -2   12.83    4.42
  -3 -21   2   14.67    3.77
   2  21  -2   35.21    5.57
  -2 -21   2   30.55    4.43
   1  21  -2   11.27    4.54
  -1 -21   2   12.58    3.88
   0  21  -2   15.56    4.71
   0 -21   2    9.95    3.89
  -1  21  -2    0.13    4.23
   1 -21   2    0.85    3.76
  -2  21  -2    2.44    4.49
   2 -21   2    1.79    4.06
  -3  21  -2   -3.24    4.25
   3 -21   2   -4.89    4.00
  -4  21  -2    9.93    4.93
   4 -21   2   16.41    4.66
  -5  21  -2   20.32    5.88
   5 -21   2   21.72    4.85
  -6  21  -2    4.82    5.32
   6 -21   2    5.09    5.09
  -7  21  -2   10.71    5.08
   7 -21   2   13.18    4.93
   8 -21   2   10.64    5.64
   9 -21   2    7.73    5.41
  10  20  -2   -3.68    4.30
   9  20  -2   14.40    3.83
   9  20  -2    1.04    4.37
   8  20  -2    1.56    4.17
   8  20  -2   10.10    3.28
   7  20  -2    6.39    2.93
   7  20  -2    3.48    2.14
   7  20  -2   -0.29    4.09
   6  20  -2    2.40    2.37
   6  20  -2    1.90    4.18
   6  20  -2    3.30    4.02
   5  20  -2   -0.85    4.32
  -5 -20   2   -4.48    3.39
   4  20  -2    2.27    4.32
  -4 -20   2   -1.13    3.59
   3  20  -2   10.79    4.83
  -3 -20   2    6.30    3.40
   2  20  -2   25.68    5.21
  -2 -20   2   25.19    3.99
   1  20  -2    6.05    4.29
  -1 -20   2    9.22    3.70
   0  20  -2   11.57    4.59
   0 -20   2    5.84    3.68
  -1  20  -2   41.91    5.39
   1 -20   2   37.92    4.66
  -2  20  -2    6.88    4.46
   2 -20   2   -1.63    3.72
  -3  20  -2    8.37    4.68
   3 -20   2    8.49    4.19
  -4  20  -2    0.54    4.88
   4 -20   2   10.53    4.73
  -5  20  -2    2.71    4.35
   5 -20   2   -0.28    4.21
  -6  20  -2   10.02    5.31
   6 -20   2    3.68    4.83
  -7  20  -2    2.04    4.64
   7 -20   2    2.03    4.43
   8 -20   2    3.03    5.06
   9 -20   2    3.90    5.28
  10 -20   2   17.81    5.53
  10  19  -2    4.24    3.75
  10  19  -2   -5.74    4.10
   9  19  -2   -3.04    4.07
   9  19  -2    3.14    3.33
   8  19  -2    4.00    3.03
   8  19  -2   -0.46    3.88
   7  19  -2   -1.43    3.78
   7  19  -2   10.24    3.04
   7  19  -2    8.16    2.16
   6  19  -2   14.53    4.24
   6  19  -2   15.99    2.95
   6  19  -2   13.92    2.65
   5  19  -2   -1.03    3.98
   5  19  -2    4.00    2.34
  -5 -19   2    3.03    3.02
   4  19  -2   20.90    3.02
   4  19  -2   18.48    4.76
  -4 -19   2   24.56    3.73
   3  19  -2   28.15    4.55
  -3 -19   2   32.68    4.33
   2  19  -2   40.06    5.03
  -2 -19   2   35.48    4.45
   1  19  -2   -0.55    3.87
  -1 -19   2   -0.40    3.29
   0  19  -2    7.77    4.29
   0 -19   2    5.37    3.57
  -1  19  -2   -0.57    3.97
   1 -19   2    4.47    3.64
  -2  19  -2    2.04    4.25
   2 -19   2   -2.61    3.66
  -3  19  -2   20.52    4.86
   3 -19   2   21.42    4.45
  -4  19  -2   10.97    5.07
   4 -19   2   12.02    4.69
  -5  19  -2    5.12    4.32
   5 -19   2   -0.39    3.98
  -6  19  -2   14.88    5.30
   6 -19   2   13.95    4.41
  -7  19  -2   12.87    4.82
   7 -19   2    6.52    4.35
  -8  19  -2    1.34    5.37
   8 -19   2    1.07    4.69
   9 -19   2   -1.88    4.77
  10 -19   2   -0.63    4.33
  11  18  -2   -2.93    3.90
  11  18  -2    5.53    3.83
  10  18  -2   19.93    4.14
  10  18  -2    8.64    4.17
   9  18  -2    0.46    3.27
   9  18  -2   -4.43    3.75
   8  18  -2    4.56    3.06
   8  18  -2    2.74    3.79
   7  18  -2   28.90    2.49
   7  18  -2   19.97    4.34
   7  18  -2   27.13    3.57
   6  18  -2    7.81    2.41
   6  18  -2   10.14    2.80
   6  18  -2    8.53    3.87
  -6 -18   2    6.20    3.24
   5  18  -2    2.35    2.31
   5  18  -2    1.26    3.79
  -5 -18   2    3.26    2.93
   4  18  -2    1.61    2.04
   4  18  -2    1.48    3.53
  -4 -18   2   -0.33    3.23
   3  18  -2    4.94    4.10
   3  18  -2    2.66    1.77
  -3 -18   2    3.41    3.05
   2  18  -2   -3.63    3.54
   2  18  -2    1.21    2.17
  -2 -18   2   -1.03    2.99
   1  18  -2   23.98    4.40
  -1 -18   2   14.56    3.61
   0  18  -2   13.53    4.25
   0 -18   2   13.70    3.69
  -1  18  -2    8.92    4.16
   1 -18   2    6.14    3.54
  -2  18  -2   25.39    4.71
   2 -18   2   30.47    4.36
  -3  18  -2   10.37    4.44
   3 -18   2    8.65    3.95
  -4  18  -2   -1.03    4.47
   4 -18   2   -2.83    3.68
  -5  18  -2   -2.33    4.02
   5 -18   2   -4.39    3.88
  -6  18  -2   12.09    5.02
   6 -18   2    5.35    4.68
  -7  18  -2    7.53    4.51
   7 -18   2    5.17    4.27
  -8  18  -2   10.24    4.86
   8 -18   2   14.12    4.44
   9 -18   2   29.56    5.01
  10 -18   2    5.44    4.42
  11 -18   2   -1.59    4.71
  11  17  -2   11.63    4.09
  11  17  -2    0.02    3.82
  10  17  -2    4.90    3.73
  10  17  -2    0.43    3.72
  10  17  -2    4.71    3.54
   9  17  -2   -4.53    3.61
   9  17  -2    2.39    2.80
   9  17  -2    3.32    3.19
   8  17  -2    1.65    2.88
   8  17  -2    0.15    2.66
   8  17  -2    0.92    3.51
   7  17  -2    1.79    2.63
   7  17  -2    1.51    3.57
   7  17  -2    2.11    1.85
   7  17  -2    5.83    2.92
   6  17  -2   -0.37    3.51
   6  17  -2    1.88    2.10
   6  17  -2    0.92    2.47
   6  17  -2    0.81    2.56
  -6 -17   2   -0.66    2.78
   5  17  -2   10.61    3.94
   5  17  -2   15.37    3.15
   5  17  -2   16.71    2.78
  -5 -17   2   18.08    3.17
   4  17  -2   64.30    3.60
   4  17  -2   70.91    5.49
   4  17  -2   62.20    5.23
  -4 -17   2   64.86    4.74
   3  17  -2    0.93    1.82
   3  17  -2   -1.32    3.44
  -3 -17   2    3.04    3.34
   2  17  -2   28.70    2.42
   2  17  -2   36.10    4.99
  -2 -17   2   31.73    3.79
   1  17  -2   -3.13    4.12
   1  17  -2    0.58    1.29
  -1 -17   2    1.50    3.12
   0  17  -2    3.89    3.95
   0 -17   2    3.40    3.42
  -1  17  -2    9.62    4.12
   1 -17   2   13.11    3.62
  -2  17  -2    7.45    4.19
   2 -17   2   10.68    3.87
  -3  17  -2    3.13    3.99
   3 -17   2    0.17    3.70
  -4  17  -2   23.00    5.05
   4 -17   2   24.82    4.37
  -5  17  -2   46.66    5.10
   5 -17   2   43.27    4.93
  -6  17  -2    7.22    4.66
   6 -17   2    4.63    4.43
  -7  17  -2    2.43    4.21
   7 -17   2    3.07    4.06
  -8  17  -2    4.37    4.10
   8 -17   2    4.37    4.08
   9 -17   2   -0.22    3.95
  10 -17   2    7.03    4.55
  11 -17   2    8.10    4.27
  12  16  -2   -2.00    3.79
  12  16  -2   15.00    4.46
  11  16  -2    8.90    3.16
  11  16  -2   -1.21    3.66
  11  16  -2   15.26    4.33
  10  16  -2   -2.18    3.43
  10  16  -2    3.21    2.77
  10  16  -2    5.43    3.64
   9  16  -2   17.89    3.78
   9  16  -2    6.25    3.69
   9  16  -2   16.33    3.22
   8  16  -2   26.55    3.59
   8  16  -2   23.55    3.81
   8  16  -2   19.77    4.01
   7  16  -2    8.33    3.06
   7  16  -2    2.35    2.66
   7  16  -2    2.60    1.73
   7  16  -2    1.00    3.46
   6  16  -2    0.59    1.99
   6  16  -2   -3.97    3.21
   6  16  -2    1.31    2.60
   6  16  -2    1.80    2.49
  -6 -16   2   -3.39    2.63
   5  16  -2    1.07    2.54
   5  16  -2   -1.13    2.12
   5  16  -2    1.98    3.65
   5  16  -2    1.61    2.29
  -5 -16   2    2.15    2.63
   4  16  -2    1.24    2.13
   4  16  -2    0.21    3.70
   4  16  -2   -1.19    2.55
  -4 -16   2    0.16    2.99
   3  16  -2   17.26    3.29
   3  16  -2   22.72    4.41
   3  16  -2   22.83    2.42
  -3 -16   2   20.44    3.28
   2  16  -2   29.24    3.57
   2  16  -2   31.36    4.40
   2  16  -2   24.79    2.52
  -2 -16   2   32.92    3.97
   1  16  -2   14.93    3.95
   1  16  -2    8.25    1.57
   1  16  -2   10.81    4.09
  -1 -16   2   10.10    3.15
   0  16  -2   21.30    4.65
   0 -16   2    9.97    3.33
  -1  16  -2   53.74    5.52
   1 -16   2   51.45    4.44
  -2  16  -2   11.60    4.21
   2 -16   2   11.36    3.75
  -3  16  -2    2.91    4.02
   3 -16   2    5.03    3.82
  -4  16  -2   28.89    4.99
   4 -16   2   18.72    4.60
  -5  16  -2    4.67    3.79
   5 -16   2   -5.73    3.62
  -6  16  -2    3.89    4.31
   6 -16   2   -1.56    3.57
  -7  16  -2   11.31    4.20
   7 -16   2    9.73    4.15
  -8  16  -2   16.77    4.38
   8 -16   2    7.62    4.16
   9 -16   2    1.37    3.90
  10 -16   2   10.96    4.49
  11 -16   2    5.14    4.55
  12 -16   2   -2.91    4.17
  12  15  -2    0.22    3.79
  12  15  -2   14.13    4.26
  12  15  -2   11.39    3.38
  11  15  -2   -2.76    3.50
  11  15  -2    5.57    3.69
  11  15  -2    4.21    2.87
  10  15  -2    0.52    2.62
  10  15  -2   -1.19    3.28
  10  15  -2    1.35    3.46
   9  15  -2    1.23    3.41
   9  15  -2    0.74    3.33
   9  15  -2    1.41    2.58
   8  15  -2    0.51    2.43
   8  15  -2   -1.30    3.20
   8  15  -2   -0.74    3.07
   7  15  -2    3.66    3.28
   7  15  -2    5.74    1.70
   7  15  -2    7.71    3.04
   7  15  -2    3.03    2.46
  -7 -15   2    5.90    3.11
   6  15  -2   16.68    3.02
   6  15  -2   18.86    2.34
   6  15  -2   17.41    3.05
   6  15  -2   21.75    3.77
  -6 -15   2   19.41    2.98
   5  15  -2   41.28    4.37
   5  15  -2   30.81    3.08
   5  15  -2   33.30    3.52
   5  15  -2   42.01    4.60
  -5 -15   2   32.48    3.51
   4  15  -2    1.49    2.19
   4  15  -2   -0.67    2.40
   4  15  -2    3.30    3.68
  -4 -15   2    3.26    2.94
   3  15  -2   20.08    3.14
   3  15  -2   23.92    3.85
   3  15  -2   17.69    2.33
  -3 -15   2   19.83    3.10
   2  15  -2   10.21    1.87
   2  15  -2   13.75    2.95
   2  15  -2   11.20    3.99
  -2 -15   2   14.96    3.04
   1  15  -2    1.59    3.39
   1  15  -2   -0.53    2.33
  -1 -15   2   -0.01    2.73
   0  15  -2    3.04    3.50
   0 -15   2    0.84    3.17
  -1  15  -2    9.04    3.72
   1 -15   2   10.89    3.60
  -2  15  -2   -1.77    3.59
   2 -15   2    0.64    3.32
  -3  15  -2    2.22    3.82
   3 -15   2   -2.26    3.42
  -4  15  -2   47.56    4.76
   4 -15   2   48.56    4.93
  -5  15  -2    5.76    4.28
   5 -15   2    4.59    3.78
  -6  15  -2   23.04    4.30
   6 -15   2   26.17    4.28
  -7  15  -2   44.69    5.00
   7 -15   2   40.64    4.79
  -8  15  -2    1.71    3.75
   8 -15   2   -1.27    3.72
   9 -15   2    1.38    4.19
  10 -15   2    5.10    3.76
  11 -15   2    4.72    3.74
  12 -15   2    5.95    4.07
  13  14  -2    4.28    3.22
  13  14  -2   -6.66    3.69
  13  14  -2    3.19    4.44
  12  14  -2    4.61    3.98
  12  14  -2   -2.21    3.55
  12  14  -2    1.29    2.90
  11  14  -2   -1.62    3.40
  11  14  -2    4.21    3.66
  11  14  -2    2.14    2.71
  10  14  -2   25.21    3.37
  10  14  -2   18.87    3.75
  10  14  -2   33.42    4.31
   9  14  -2   12.17    3.70
   9  14  -2    3.36    3.29
   9  14  -2    9.34    2.72
   8  14  -2    3.45    1.38
   8  14  -2    1.65    3.17
   8  14  -2    2.84    2.47
   8  14  -2   -0.36    3.08
   7  14  -2   19.12    2.96
   7  14  -2   21.22    3.19
   7  14  -2   18.28    3.57
   7  14  -2   21.52    2.21
  -7 -14   2   21.83    2.98
   6  14  -2    4.61    2.46
   6  14  -2    4.30    2.78
   6  14  -2    4.72    1.93
  -6 -14   2    6.66    2.58
   5  14  -2   10.21    3.48
   5  14  -2    7.44    2.18
   5  14  -2    6.23    2.56
   5  14  -2    8.73    2.61
  -5 -14   2    7.77    2.77
   4  14  -2   -1.00    2.10
   4  14  -2   -1.29    3.26
   4  14  -2    0.11    2.25
  -4 -14   2   -0.66    2.71
   3  14  -2   26.11    2.70
   3  14  -2   31.23    4.10
   3  14  -2   30.08    3.69
  -3 -14   2   29.25    3.08
   2  14  -2   13.39    2.66
   2  14  -2   17.28    3.53
  -2 -14   2   15.05    2.80
   1  14  -2   28.23    3.82
   1  14  -2   30.08    3.93
  -1 -14   2   32.39    3.49
   0  14  -2   91.26    4.81
   0  14  -2   89.73    7.68
   0 -14   2   88.16    4.36
  -1  14  -2    3.98    3.43
   1 -14   2    1.68    2.77
  -2  14  -2    2.41    3.38
   2 -14   2    2.87    3.10
  -3  14  -2    7.96    3.55
   3 -14   2   10.83    3.42
   3 -14   2    5.05    2.53
  -4  14  -2   -0.21    3.41
   4 -14   2   -2.66    2.49
   4 -14   2   -0.45    3.27
  -5  14  -2    5.17    4.16
   5 -14   2    7.39    3.55
   5 -14   2    5.05    3.02
  -6  14  -2    1.54    3.62
   6 -14   2    5.05    3.66
   6 -14   2    1.13    2.99
  -7  14  -2   28.59    4.69
   7 -14   2   24.03    4.51
   7 -14   2   19.35    3.71
  -8  14  -2    2.66    4.01
   8 -14   2   -0.02    3.97
   8 -14   2   -0.51    3.07
   9 -14   2   23.60    4.19
   9 -14   2   20.97    4.35
  10 -14   2    7.00    5.94
  10 -14   2   12.13    4.21
  11 -14   2    2.31    3.91
  12 -14   2    1.40    3.75
  13 -14   2    2.92    3.76
  13  13  -2    6.81    4.55
  13  13  -2   -4.64    3.60
  13  13  -2    6.36    3.22
  12  13  -2    7.02    4.30
  12  13  -2    4.51    2.92
  12  13  -2   -4.70    3.29
  11  13  -2    0.04    3.67
  11  13  -2   -1.96    3.21
  11  13  -2    2.88    2.63
  10  13  -2    3.09    2.57
  10  13  -2    3.35    3.18
  10  13  -2    1.74    3.32
   9  13  -2    1.71    3.10
   9  13  -2    2.30    3.33
   9  13  -2    1.19    2.34
   8  13  -2    0.45    0.86
   8  13  -2    1.79    2.30
   8  13  -2    2.01    2.98
   8  13  -2    1.90    3.21
   7  13  -2   13.41    2.63
   7  13  -2   12.93    3.02
   7  13  -2    9.81    3.23
   7  13  -2   13.00    1.70
  -7 -13   2   14.17    2.65
   6  13  -2   18.25    3.17
   6  13  -2   18.41    2.06
   6  13  -2   15.19    2.69
  -6 -13   2   17.38    2.79
   5  13  -2   13.88    2.78
   5  13  -2   16.42    3.38
   5  13  -2   14.42    2.68
   5  13  -2   18.62    2.22
  -5 -13   2   11.40    2.69
   4  13  -2   29.65    2.96
   4  13  -2   31.15    3.89
   4  13  -2   29.83    3.70
  -4 -13   2   28.35    2.83
   3  13  -2   10.51    1.99
   3  13  -2   10.50    2.49
   3  13  -2   14.97    3.41
  -3 -13   2   12.65    2.53
   2  13  -2    3.09    2.88
   2  13  -2    4.12    2.13
  -2 -13   2    3.06    2.60
   1  13  -2   33.05    3.61
   1  13  -2   34.29    3.56
  -1 -13   2   29.86    3.03
   0  13  -2    3.07    2.98
   0  13  -2    3.81    2.37
   0 -13   2    5.23    2.54
  -1  13  -2   -1.81    3.05
   1 -13   2    2.21    2.69
  -2  13  -2   44.37    4.03
   2 -13   2   44.97    3.90
   2 -13   2   45.90    3.85
  -3  13  -2   32.42    3.92
   3 -13   2   31.43    3.62
   3 -13   2   27.54    3.75
  -4  13  -2   10.58    3.51
   4 -13   2    6.14    3.23
   4 -13   2    6.91    2.62
  -5  13  -2   40.78    4.32
   5 -13   2   48.73    4.31
   5 -13   2   41.04    4.88
  -6  13  -2   38.83    4.51
   6 -13   2   36.91    4.86
   6 -13   2   37.86    4.33
  -7  13  -2    2.16    3.77
   7 -13   2   -1.72    3.35
   7 -13   2   -0.16    2.98
  -8  13  -2    3.20    3.70
   8 -13   2    1.97    3.40
   8 -13   2    1.73    3.21
   9 -13   2    0.58    3.16
   9 -13   2   -0.87    3.37
  10 -13   2    0.70    3.29
  10 -13   2   -0.89    3.29
  11 -13   2    3.02    3.95
  11 -13   2    2.37    3.26
  12 -13   2    9.02    4.37
  12 -13   2   12.22    3.84
  13 -13   2    9.08    3.69
  13  12  -2    7.62    4.28
  13  12  -2   -4.80    3.47
  13  12  -2    1.28    2.95
  12  12  -2    3.76    3.46
  12  12  -2    9.23    4.19
  12  12  -2    4.23    2.87
  11  12  -2    5.63    3.88
  11  12  -2    3.13    3.23
  11  12  -2    5.68    2.74
  10  12  -2    6.18    3.20
  10  12  -2    5.71    3.68
  10  12  -2    7.52    2.65
   9  12  -2    7.14    3.07
   9  12  -2    8.18    3.41
   9  12  -2   10.30    2.55
   8  12  -2   80.45    5.67
   8  12  -2   82.95    4.90
   8  12  -2   76.38    5.22
   8  12  -2   71.25    1.63
   7  12  -2    4.15    2.99
   7  12  -2    3.42    2.28
   7  12  -2    5.05    1.43
   7  12  -2    3.73    2.81
  -7 -12   2    2.61    2.34
   6  12  -2    0.22    2.08
   6  12  -2   -0.47    1.58
   6  12  -2    2.11    2.59
   6  12  -2   -0.21    2.80
  -6 -12   2   -0.61    2.19
   5  12  -2    1.82    1.68
   5  12  -2    3.33    2.30
   5  12  -2   -0.89    2.81
   5  12  -2   -0.55    1.94
  -5 -12   2    1.66    2.17
   4  12  -2    2.77    2.08
   4  12  -2    2.13    2.03
   4  12  -2    2.77    2.61
  -4 -12   2    3.87    2.32
   3  12  -2   11.37    3.07
   3  12  -2    9.11    2.16
  -3 -12   2    9.94    2.24
   2  12  -2   33.99    3.31
   2  12  -2   31.83    3.56
  -2 -12   2   37.80    3.14
   1  12  -2   63.55    3.84
   1  12  -2   68.82    4.12
  -1 -12   2   68.45    3.47
   0  12  -2   50.63    3.76
   0  12  -2   55.51    4.47
   0 -12   2   51.46    3.41
  -1  12  -2   34.12    3.51
   1 -12   2   34.23    3.39
  -2  12  -2   38.79    3.77
   2 -12   2   36.30    3.59
   2 -12   2   34.35    3.51
  -3  12  -2   -0.96    3.17
   3 -12   2    0.56    2.08
   3 -12   2   -0.16    2.59
  -4  12  -2    9.99    3.38
   4 -12   2    8.25    3.09
   4 -12   2    7.16    2.57
  -5  12  -2    3.92    3.28
   5 -12   2   -0.93    2.99
   5 -12   2    2.60    2.56
  -6  12  -2    2.07    3.34
   6 -12   2    1.26    2.77
   6 -12   2    4.68    3.24
  -7  12  -2   24.33    3.96
   7 -12   2   13.20    3.39
   7 -12   2   17.44    3.73
  -8  12  -2   53.02    4.25
   8 -12   2   53.78    5.76
   8 -12   2   51.99    4.59
   9 -12   2    7.94    3.79
   9 -12   2    6.78    3.57
  10 -12   2    3.88    3.61
  10 -12   2    2.43    3.57
  11 -12   2    8.41    3.91
  11 -12   2    7.81    3.54
  12 -12   2   -1.09    3.23
  12 -12   2    2.90    3.94
  13 -12   2   -2.95    3.16
  13 -12   2   -0.51    4.11
  14  11  -2   15.47    3.64
  14  11  -2   -1.18    3.69
  14  11  -2    7.64    4.56
  13  11  -2   -2.07    3.51
  13  11  -2    2.54    4.07
  13  11  -2    3.97    3.02
  12  11  -2    8.12    4.36
  12  11  -2    1.51    3.34
  12  11  -2   10.41    3.03
  11  11  -2    4.00    3.63
  11  11  -2    1.35    2.56
  11  11  -2   -0.79    3.04
  10  11  -2    1.96    2.98
  10  11  -2   -2.53    3.15
  10  11  -2    0.79    2.35
   9  11  -2    3.21    2.83
   9  11  -2    2.70    3.44
   9  11  -2    2.96    2.26
   8  11  -2    5.03    2.91
   8  11  -2    4.17    3.06
   8  11  -2    3.61    2.27
   8  11  -2    4.09    0.67
  -8 -11   2   -0.17    2.13
   7  11  -2    0.20    1.21
   7  11  -2    1.51    2.77
   7  11  -2   -0.40    2.07
   7  11  -2    1.51    2.75
  -7 -11   2   -1.05    2.23
   6  11  -2   24.58    3.10
   6  11  -2   28.04    2.12
   6  11  -2   31.48    3.30
   6  11  -2   28.55    3.62
  -6 -11   2   31.52    2.76
   5  11  -2   37.91    2.40
   5  11  -2   34.80    3.05
   5  11  -2   34.60    3.63
   5  11  -2   42.56    3.59
  -5 -11   2   36.15    2.96
   4  11  -2    2.77    1.98
   4  11  -2    3.01    1.89
   4  11  -2    3.99    2.63
  -4 -11   2    2.07    2.07
   3  11  -2   59.49    3.73
   3  11  -2   50.29    3.24
  -3 -11   2   50.49    2.89
   2  11  -2   71.34    3.60
   2  11  -2   75.99    3.80
  -2 -11   2   72.01    3.26
   1  11  -2   27.58    3.39
   1  11  -2   30.02    3.16
  -1 -11   2   30.77    3.24
   0  11  -2    0.31    1.79
   0  11  -2    2.73    2.67
   0 -11   2    1.28    2.25
  -1  11  -2   68.06    3.80
   1 -11   2   62.25    3.58
  -2  11  -2   21.04    3.26
   2 -11   2   17.29    2.45
   2 -11   2   18.89    2.84
  -3  11  -2   20.18    3.29
   3 -11   2   17.04    2.89
   3 -11   2   15.61    2.62
  -4  11  -2  165.59    5.39
   4 -11   2  169.48    5.96
  -5  11  -2   19.12    3.46
   5 -11   2   11.47    3.05
   5 -11   2   14.70    2.77
  -6  11  -2    3.11    3.41
   6 -11   2    4.42    2.76
   6 -11   2    4.59    2.94
  -7  11  -2   17.20    3.89
   7 -11   2   14.61    3.80
   7 -11   2   14.89    3.23
  -8  11  -2   16.47    3.77
   8 -11   2    7.08    3.10
   8 -11   2    5.40    3.57
   9 -11   2    2.60    3.43
   9 -11   2   -0.45    3.17
  10 -11   2   -0.57    3.27
  10 -11   2   -0.68    3.23
  11 -11   2    3.94    3.73
  11 -11   2    3.01    3.25
  12 -11   2   -2.02    3.65
  12 -11   2    1.79    3.18
  13 -11   2    8.47    3.20
  13 -11   2    7.81    4.56
  14 -11   2    4.89    3.27
  14 -11   2    3.95    4.48
  14  10  -2    3.89    3.12
  14  10  -2    2.04    4.52
  14  10  -2   -6.55    3.42
  13  10  -2    1.77    4.28
  13  10  -2    6.65    3.02
  13  10  -2   -2.94    3.33
  12  10  -2   -2.20    3.13
  12  10  -2    6.93    4.01
  12  10  -2    6.24    2.83
  11  10  -2   11.67    2.82
  11  10  -2    6.33    3.12
  11  10  -2   15.85    3.93
  10  10  -2   11.14    3.79
  10  10  -2    6.95    2.54
  10  10  -2    4.92    2.98
   9  10  -2   47.07    4.30
   9  10  -2   41.02    4.56
   9  10  -2   50.03    4.98
   8  10  -2   16.11    3.03
   8  10  -2   15.25    3.45
   8  10  -2   13.63    2.50
  -8 -10   2   16.27    2.52
   7  10  -2   10.19    1.31
   7  10  -2   12.17    3.30
   7  10  -2    7.70    2.75
   7  10  -2   11.37    2.30
  -7 -10   2   11.71    2.18
   6  10  -2    6.02    2.74
   6  10  -2    6.76    2.01
   6  10  -2    3.96    2.49
   6  10  -2    8.06    1.46
  -6 -10   2    4.97    1.98
   5  10  -2    0.86    1.71
   5  10  -2    1.55    2.06
   5  10  -2   -0.32    1.37
  -5 -10   2    1.11    1.86
   4  10  -2    3.83    1.89
   4  10  -2    6.12    2.48
   4  10  -2    4.68    1.62
   4  10  -2    5.58    1.86
  -4 -10   2    5.28    1.99
   3  10  -2   43.19    3.29
   3  10  -2   40.07    2.89
  -3 -10   2   35.29    2.84
   2  10  -2   72.62    3.78
   2  10  -2   75.58    3.86
  -2 -10   2   71.08    3.13
   1  10  -2    3.46    2.53
   1  10  -2    4.07    1.90
  -1 -10   2    2.41    2.28
   0  10  -2  103.71    4.15
   0  10  -2  117.07    4.45
   0 -10   2  116.99    3.96
  -1  10  -2    4.86    2.64
   1 -10   2    4.36    2.16
   1 -10   2    7.23    2.43
  -2  10  -2   17.51    2.97
   2 -10   2   16.67    2.70
   2 -10   2   15.27    2.39
  -3  10  -2   13.15    2.97
   3 -10   2    8.94    2.64
   3 -10   2    8.32    2.21
  -4  10  -2    1.27    2.88
   4 -10   2   -1.43    1.98
   4 -10   2   -0.15    2.35
  -5  10  -2    5.76    3.14
   5 -10   2    2.39    2.20
   5 -10   2    2.69    2.92
  -6  10  -2   35.34    3.71
   6 -10   2   41.52    5.13
   6 -10   2   35.64    3.50
   6 -10   2   37.51    4.53
  -7  10  -2   95.64    4.90
   7 -10   2   94.62    5.47
   7 -10   2   96.49    4.67
   7 -10   2  107.23    6.51
  -8  10  -2    4.87    3.02
   8 -10   2    1.69    2.83
   8 -10   2    6.46    3.34
   9 -10   2    7.37    3.05
   9 -10   2    4.97    3.20
  10 -10   2   30.49    3.73
  10 -10   2   26.77    4.12
  11 -10   2    2.73    3.60
  11 -10   2    2.79    3.04
  12 -10   2    4.07    2.83
  12 -10   2   -1.84    3.62
  13 -10   2   -2.58    3.73
  13 -10   2    2.82    3.02
  14 -10   2    5.01    3.00
  14 -10   2    2.50    4.25
  14   9  -2   -4.79    3.40
  14   9  -2    7.24    4.73
  14   9  -2    6.36    3.25
  13   9  -2   17.51    3.38
  13   9  -2   10.21    3.67
  13   9  -2   15.48    4.58
  12   9  -2    9.51    2.84
  12   9  -2    9.05    4.06
  12   9  -2    3.97    3.28
  11   9  -2    5.06    2.49
  11   9  -2    2.58    2.99
  11   9  -2    7.88    3.99
  10   9  -2    2.70    2.27
  10   9  -2   -1.96    2.65
  10   9  -2   -0.09    3.34
   9   9  -2    9.70    2.42
   9   9  -2   12.48    3.89
   9   9  -2   11.17    2.94
   8   9  -2    2.47    2.59
   8   9  -2   -0.09    2.02
   8   9  -2    0.97    2.98
  -8  -9   2   -2.21    1.99
   7   9  -2   33.47    1.60
   7   9  -2   38.11    1.68
   7   9  -2   38.01    4.40
   7   9  -2   36.85    3.53
   7   9  -2   32.88    3.55
  -7  -9   2   35.24    2.78
   6   9  -2   56.59    2.10
   6   9  -2   60.15    4.27
   6   9  -2   50.42    3.62
   6   9  -2   58.38    3.57
  -6  -9   2   53.17    2.81
   5   9  -2    1.83    2.21
   5   9  -2    0.53    1.60
   5   9  -2   -0.40    1.31
  -5  -9   2   -0.36    1.73
   4   9  -2   45.29    2.24
   4   9  -2   47.35    3.20
   4   9  -2   43.57    2.93
   4   9  -2   46.36    3.01
  -4  -9   2   48.44    2.73
   3   9  -2   83.20    3.75
   3   9  -2   80.58    3.54
  -3  -9   2   78.47    3.18
   2   9  -2    0.58    2.44
   2   9  -2    2.73    1.71
  -2  -9   2    1.49    1.87
   1   9  -2    3.95    2.42
   1   9  -2    4.27    1.82
  -1  -9   2    3.41    1.97
   0   9  -2   11.39    2.70
   0   9  -2    8.74    1.95
   0  -9   2    8.60    2.18
  -1   9  -2   -0.99    2.48
   1  -9   2   -1.18    2.13
   1  -9   2   -0.06    1.71
  -2   9  -2    1.20    2.56
   2  -9   2    2.58    1.90
   2  -9   2    2.16    2.28
  -3   9  -2  142.77    4.90
   3  -9   2  151.20    5.12
   3  -9   2  155.59    4.60
  -4   9  -2   70.92    3.65
   4  -9   2   73.81    3.69
   4  -9   2   77.64    4.33
  -5   9  -2    1.22    2.44
   5  -9   2   -0.23    2.40
   5  -9   2   -0.08    2.04
   5  -9   2   -2.07    2.35
  -6   9  -2   35.35    3.71
   6  -9   2   33.42    3.50
   6  -9   2   28.72    3.43
   6  -9   2   26.06    3.07
  -7   9  -2    6.10    3.10
   7  -9   2    6.43    3.15
   7  -9   2    3.14    3.04
   7  -9   2    5.80    2.64
  -8   9  -2   -1.86    2.91
   8  -9   2    2.14    2.79
   8  -9   2    2.95    3.21
   8  -9   2    2.15    2.75
   9  -9   2    9.51    3.18
   9  -9   2    5.77    3.27
  10  -9   2    1.25    2.91
  10  -9   2    0.91    3.04
  11  -9   2    6.87    2.92
  11  -9   2    3.92    3.54
  12  -9   2    9.29    3.85
  12  -9   2   10.40    3.04
  13  -9   2   12.96    4.41
  13  -9   2   10.28    2.95
  14  -9   2    1.42    4.19
  14  -9   2    1.08    2.73
  14   8  -2   -3.40    3.33
  14   8  -2    5.77    3.19
  14   8  -2   -1.60    4.10
  13   8  -2   -3.21    3.11
  13   8  -2    3.54    2.91
  13   8  -2   -0.15    4.01
  12   8  -2    0.06    3.03
  12   8  -2    0.74    3.60
  12   8  -2    1.69    2.60
  11   8  -2   18.44    4.03
  11   8  -2   12.59    2.88
  11   8  -2   10.94    3.15
  10   8  -2   12.10    2.62
  10   8  -2   11.25    3.77
  10   8  -2   13.28    3.04
   9   8  -2    1.70    2.58
   9   8  -2    4.53    3.36
   9   8  -2    0.51    2.09
   8   8  -2    5.48    2.10
   8   8  -2    9.06    2.62
   8   8  -2   10.71    3.49
  -8  -8   2    4.35    2.09
   7   8  -2   31.00    3.23
   7   8  -2   26.85    1.46
   7   8  -2   32.61    4.06
   7   8  -2   30.69    1.58
   7   8  -2   30.10    3.64
  -7  -8   2   25.33    2.62
   6   8  -2    8.03    1.81
   6   8  -2   11.09    1.32
   6   8  -2    8.14    2.70
   6   8  -2   11.45    2.32
  -6  -8   2   16.74    1.99
   5   8  -2    3.81    1.98
   5   8  -2    3.78    1.58
   5   8  -2    6.17    1.31
   5   8  -2    6.62    2.14
  -5  -8   2    3.13    1.68
   4   8  -2    1.56    1.37
   4   8  -2    1.23    2.06
   4   8  -2   -0.86    1.45
  -4  -8   2   -0.11    1.71
   3   8  -2   34.03    2.97
   3   8  -2   38.98    2.90
  -3  -8   2   32.74    2.57
   2   8  -2   17.27    2.52
   2   8  -2   14.47    1.99
  -2  -8   2   17.75    2.08
   1   8  -2   47.48    2.78
   1   8  -2   46.08    3.07
  -1  -8   2   46.45    2.81
   0   8  -2    4.75    2.27
   0   8  -2    4.88    1.76
   0  -8   2    6.04    1.94
  -1   8  -2    8.31    2.37
   1  -8   2    5.23    1.99
   1  -8   2    5.53    1.76
  -2   8  -2   27.31    2.88
   2  -8   2   31.77    2.99
   2  -8   2   27.46    2.80
  -3   8  -2    0.93    2.44
   3  -8   2    1.90    1.86
   3  -8   2   -1.06    2.20
  -4   8  -2    4.47    2.37
   4  -8   2    3.05    2.46
   4  -8   2    2.39    2.48
   4  -8   2    1.25    1.86
  -5   8  -2   34.13    3.34
   5  -8   2   31.57    3.60
   5  -8   2   32.59    3.43
   5  -8   2   33.99    4.33
  -6   8  -2   15.31    2.72
   6  -8   2   15.12    2.62
   6  -8   2   12.87    2.82
   6  -8   2   13.03    2.55
  -7   8  -2    3.76    2.48
   7  -8   2    2.74    2.31
   7  -8   2    5.06    2.91
   7  -8   2    5.82    2.51
  -8   8  -2   43.50    3.76
   8  -8   2   33.15    3.69
   8  -8   2   41.11    3.97
   8  -8   2   43.20    5.49
   9  -8   2   23.73    3.88
   9  -8   2   21.78    3.50
   9  -8   2   26.61    3.39
  10  -8   2    2.96    2.77
  10  -8   2    0.91    3.01
  11  -8   2   -1.96    3.23
  11  -8   2    3.25    2.73
  12  -8   2    1.14    2.58
  12  -8   2    1.83    3.38
  13  -8   2    2.12    2.53
  13  -8   2   -4.33    3.50
  14  -8   2    2.94    4.06
  14   7  -2   10.93    3.42
  14   7  -2   12.41    4.54
  14   7  -2    3.62    3.56
  13   7  -2   -2.29    3.15
  13   7  -2    2.96    2.82
  13   7  -2    0.24    3.89
  12   7  -2    3.93    4.17
  12   7  -2   -2.73    2.88
  12   7  -2    5.03    2.63
  11   7  -2   12.12    2.73
  11   7  -2   10.89    3.83
  11   7  -2    8.61    3.02
  10   7  -2    2.43    2.21
  10   7  -2    2.38    3.31
  10   7  -2    1.19    2.67
   9   7  -2   19.87    2.98
   9   7  -2   19.53    2.60
   9   7  -2   18.37    3.86
  -9  -7   2   21.79    2.50
   8   7  -2   24.74    3.86
   8   7  -2   22.68    0.97
   8   7  -2   18.75    2.32
   8   7  -2   23.55    2.85
   8   7  -2   22.14    0.94
  -8  -7   2   27.74    2.39
   7   7  -2   14.97    1.46
   7   7  -2   13.13    1.33
   7   7  -2   12.03    2.32
   7   7  -2   11.78    3.11
   7   7  -2   10.63    1.97
  -7  -7   2   13.87    1.98
   6   7  -2   13.44    1.28
   6   7  -2   13.54    2.66
   6   7  -2   10.37    1.75
   6   7  -2   12.78    2.18
  -6  -7   2   12.51    1.82
   5   7  -2    3.48    2.24
   5   7  -2   -0.36    1.38
   5   7  -2    1.17    1.20
   5   7  -2    0.51    1.83
  -5  -7   2    1.85    1.64
   4   7  -2   30.31    1.97
   4   7  -2   32.74    2.74
  -4  -7   2   30.81    2.27
   3   7  -2   75.72    3.03
   3   7  -2   76.68    3.18
  -3  -7   2   75.78    2.76
   2   7  -2   16.27    1.78
   2   7  -2   19.91    2.33
  -2  -7   2   20.37    1.99
   1   7  -2    4.05    1.51
   1   7  -2    3.04    1.91
  -1  -7   2    5.93    1.68
   0   7  -2   19.27    2.63
   0   7  -2   25.72    2.49
   0  -7   2   22.90    2.08
  -1   7  -2   54.57    2.85
   1  -7   2   58.34    2.74
   1  -7   2   52.77    2.95
  -2   7  -2   42.15    2.78
   2  -7   2   47.24    2.97
   2  -7   2   41.21    2.66
  -3   7  -2   24.80    2.64
   3  -7   2   26.86    2.62
   3  -7   2   20.26    2.26
  -4   7  -2   31.73    2.81
   4  -7   2   33.31    4.03
   4  -7   2   32.94    3.36
   4  -7   2   32.13    2.84
  -5   7  -2   25.98    2.69
   5  -7   2   21.74    2.52
   5  -7   2   25.25    2.57
   5  -7   2   25.26    2.86
  -6   7  -2    6.60    2.55
   6  -7   2    2.98    2.05
   6  -7   2    1.37    2.47
   6  -7   2    2.19    2.09
  -7   7  -2   14.73    2.80
   7  -7   2    8.54    2.89
   7  -7   2    6.84    2.35
   7  -7   2   11.94    2.42
  -8   7  -2    2.37    2.61
   8  -7   2    1.57    2.54
   8  -7   2    4.09    2.90
   8  -7   2   -0.03    2.52
   9  -7   2    2.08    2.78
   9  -7   2   -0.21    2.80
   9  -7   2    3.47    2.98
  10  -7   2    9.72    2.67
  10  -7   2    8.13    3.33
  10  -7   2    6.12    3.12
  11  -7   2   22.17    2.94
  11  -7   2   15.57    3.73
  12  -7   2   -0.54    3.25
  12  -7   2    2.84    2.41
  13  -7   2    8.15    2.49
  13  -7   2    1.53    3.59
  14  -7   2    4.84    3.99
  15   6  -2    6.59    4.79
  15   6  -2   -5.80    3.52
  14   6  -2    0.78    4.06
  14   6  -2    2.47    3.05
  14   6  -2   -4.33    3.38
  13   6  -2    3.38    2.82
  13   6  -2    5.81    4.18
  13   6  -2   -1.18    3.10
  12   6  -2    6.04    3.04
  12   6  -2   11.89    2.96
  12   6  -2    8.47    3.94
  11   6  -2   16.22    2.86
  11   6  -2   18.30    4.05
  11   6  -2   15.58    3.16
  10   6  -2    0.90    3.32
  10   6  -2    1.36    2.68
  10   6  -2    1.46    2.23
   9   6  -2   25.90    4.07
   9   6  -2   37.26    4.56
   9   6  -2   28.87    3.81
  -9  -6   2   28.12    2.78
   8   6  -2    9.10    2.42
   8   6  -2    9.53    0.92
   8   6  -2    6.22    3.00
   8   6  -2    6.37    1.97
   8   6  -2   10.47    1.08
  -8  -6   2    4.94    1.87
   7   6  -2    0.88    1.56
   7   6  -2    0.26    0.98
   7   6  -2    0.42    2.00
   7   6  -2    0.37    0.93
   7   6  -2   -1.16    2.47
  -7  -6   2   -1.63    1.60
   6   6  -2   10.46    1.66
   6   6  -2   12.67    2.05
   6   6  -2   14.58    1.26
   6   6  -2   13.09    2.64
  -6  -6   2   12.77    1.77
   5   6  -2   15.28    2.03
   5   6  -2   17.10    1.55
   5   6  -2   17.55    2.40
   5   6  -2   19.70    2.55
  -5  -6   2   17.40    1.83
   4   6  -2    2.22    1.38
   4   6  -2    3.58    1.28
   4   6  -2    1.87    1.73
  -4  -6   2    2.99    1.49
   3   6  -2  232.35    4.59
   3   6  -2  226.32    4.16
   3   6  -2  231.34    4.95
  -3  -6   2  234.04    4.37
   2   6  -2   97.29    3.05
   2   6  -2   97.10    3.20
  -2  -6   2   97.90    2.88
   1   6  -2    7.16    1.94
   1   6  -2    6.63    1.51
  -1  -6   2    9.00    1.71
   0   6  -2  380.11    6.61
   0   6  -2  398.16    9.18
   0  -6   2  373.29    6.35
  -1   6  -2  138.05    3.68
   1  -6   2  139.45    3.96
   1  -6   2  143.57    3.56
  -2   6  -2   17.77    2.25
   2  -6   2   13.59    1.81
   2  -6   2   18.24    2.04
  -3   6  -2    4.33    2.20
   3  -6   2    1.28    1.70
   3  -6   2    3.72    1.92
   3  -6   2    2.05    0.54
   3  -6   2    1.78    1.53
  -4   6  -2   17.36    2.39
   4  -6   2   15.48    2.18
   4  -6   2   13.99    2.40
   4  -6   2   10.61    1.94
   4  -6   2   12.53    0.96
  -5   6  -2   13.35    2.29
   5  -6   2    6.74    1.94
   5  -6   2   11.64    2.14
   5  -6   2    7.84    2.32
  -6   6  -2   17.02    2.59
   6  -6   2   11.75    2.23
   6  -6   2   11.64    2.64
   6  -6   2   12.02    2.29
  -7   6  -2   27.22    2.87
   7  -6   2   25.78    3.11
   7  -6   2   31.29    2.77
   7  -6   2   20.65    2.65
  -8   6  -2   27.24    2.93
   8  -6   2   28.02    3.27
   8  -6   2   23.83    3.29
   8  -6   2   31.41    2.88
   9  -6   2   -0.56    2.44
   9  -6   2    0.58    2.64
   9  -6   2    2.98    2.98
  10  -6   2   49.16    5.43
  10  -6   2   39.20    5.28
  10  -6   2   40.83    3.22
  11  -6   2    1.70    2.29
  11  -6   2    6.34    3.19
  11  -6   2    0.41    2.97
  12  -6   2   -1.67    3.17
  12  -6   2    1.41    2.21
  13  -6   2    1.50    2.09
  13  -6   2   -2.22    3.32
  14  -6   2   11.45    4.26
  15  -6   2   -4.04    3.84
  15   5  -2   -3.37    3.60
  15   5  -2    2.69    4.44
  14   5  -2    6.25    4.72
  14   5  -2    7.72    3.14
  13   5  -2    9.08    4.25
  13   5  -2    4.62    3.37
  12   5  -2   -2.53    2.78
  12   5  -2    7.33    2.74
  12   5  -2    4.55    3.74
  11   5  -2    2.72    2.41
  11   5  -2   -0.98    2.64
  11   5  -2   -2.55    3.72
  10   5  -2   -3.39    3.35
  10   5  -2    0.30    2.23
  10   5  -2   -0.25    2.53
   9   5  -2    1.78    2.09
   9   5  -2    1.56    3.26
   9   5  -2    4.49    2.50
  -9  -5   2    1.63    1.93
   8   5  -2    1.35    0.93
   8   5  -2    3.12    2.20
   8   5  -2   -1.13    3.04
   8   5  -2    0.33    1.78
   8   5  -2    2.52    0.95
  -8  -5   2   -0.10    1.77
   7   5  -2   22.57    2.10
   7   5  -2   16.85    1.98
   7   5  -2   19.11    3.23
   7   5  -2   16.98    2.21
   7   5  -2   18.62    1.46
  -7  -5   2   20.15    1.96
   6   5  -2  213.78    5.78
   6   5  -2  214.66    3.80
   6   5  -2  225.93    5.33
   6   5  -2  227.15    5.08
  -6  -5   2  221.82    4.40
   5   5  -2   85.83    3.18
   5   5  -2   86.04    3.61
   5   5  -2   87.62    3.69
   5   5  -2   81.70    2.24
  -5  -5   2   82.64    2.62
   4   5  -2   94.66    3.06
   4   5  -2   87.95    2.34
   4   5  -2   94.51    3.43
  -4  -5   2   90.79    2.61
   3   5  -2   14.93    1.96
   3   5  -2   14.61    1.48
   3   5  -2   13.31    1.68
  -3  -5   2   18.13    1.62
   2   5  -2    0.20    1.18
   2   5  -2   -1.49    1.69
  -2  -5   2    1.41    1.40
   1   5  -2  126.84    3.27
   1   5  -2  133.49    3.53
  -1  -5   2  128.46    3.18
   0   5  -2  362.92    6.28
   0  -5   2  359.88    6.06
   0  -5   2  379.25    7.35
  -1   5  -2  135.31    3.61
   1  -5   2  131.89    3.45
   1  -5   2  139.26    3.86
  -2   5  -2   -3.05    1.82
   2  -5   2   -0.36    1.63
   2  -5   2    1.01    1.43
  -3   5  -2  197.92    4.27
   3  -5   2  196.03    3.06
   3  -5   2  191.45    4.08
   3  -5   2  195.73    4.98
   3  -5   2  195.72    4.78
  -4   5  -2  109.67    3.29
   4  -5   2  112.02    2.32
   4  -5   2  108.93    3.20
   4  -5   2  105.05    3.85
   4  -5   2  111.12    4.05
  -5   5  -2    1.11    2.03
   5  -5   2    1.49    1.75
   5  -5   2    2.15    2.14
   5  -5   2    0.93    1.73
  -6   5  -2   53.89    2.89
   6  -5   2   53.74    3.66
   6  -5   2   53.61    2.67
   6  -5   2   55.49    4.01
  -7   5  -2    0.94    1.96
   7  -5   2    0.13    1.98
   7  -5   2   -0.01    2.22
   7  -5   2   -0.19    1.90
  -8   5  -2    5.13    2.24
   8  -5   2    2.99    2.62
   8  -5   2    5.89    2.20
   8  -5   2    5.10    2.37
   9  -5   2   19.26    3.37
   9  -5   2   18.11    3.18
   9  -5   2   22.42    2.73
  10  -5   2    2.23    2.84
  10  -5   2    7.13    2.29
  10  -5   2    5.37    3.08
  11  -5   2    1.87    2.99
  11  -5   2   -2.60    2.88
  11  -5   2    3.05    2.12
  12  -5   2   10.88    3.73
  12  -5   2    6.77    3.49
  12  -5   2    7.29    2.13
  13  -5   2   12.69    3.85
  14  -5   2    0.18    3.70
  15  -5   2    4.44    4.22
  15   4  -2   -1.99    3.74
  15   4  -2    4.84    4.49
  14   4  -2    7.12    4.36
  14   4  -2   -4.08    3.36
  14   4  -2    8.16    3.20
  13   4  -2   -1.58    3.20
  13   4  -2   -0.33    4.22
  13   4  -2    3.20    2.80
  12   4  -2    5.96    2.76
  12   4  -2    0.33    3.72
  12   4  -2   -2.85    2.86
  11   4  -2   18.40    3.16
  11   4  -2   20.76    3.01
  11   4  -2   15.01    3.93
  10   4  -2   27.93    3.22
  10   4  -2   32.07    4.37
  10   4  -2   37.92    4.33
 -10  -4   2   33.18    3.11
   9   4  -2   49.00    4.43
   9   4  -2   42.85    4.55
   9   4  -2   40.46    1.55
   9   4  -2   39.17    3.94
   9   4  -2   40.60    1.58
  -9  -4   2   37.93    2.84
   8   4  -2    2.83    1.15
   8   4  -2    1.39    1.79
   8   4  -2    2.60    1.10
   8   4  -2    2.86    2.94
   8   4  -2    3.81    2.13
  -8  -4   2    1.82    1.67
   7   4  -2    8.02    1.74
   7   4  -2    8.80    2.00
   7   4  -2    9.04    1.21
   7   4  -2    6.93    2.76
  -7  -4   2    8.95    1.78
   6   4  -2    0.21    1.06
   6   4  -2    1.10    1.66
   6   4  -2    1.26    2.51
   6   4  -2    0.18    1.40
  -6  -4   2   -0.82    1.42
   5   4  -2   -0.98    1.53
   5   4  -2   -0.68    1.07
   5   4  -2    0.70    1.28
   5   4  -2   -0.59    1.99
  -5  -4   2    0.20    1.41
   4   4  -2    3.78    1.08
   4   4  -2    5.03    1.46
   4   4  -2    4.40    1.22
  -4  -4   2    7.17    1.33
   3   4  -2  142.71    3.64
   3   4  -2  140.74    2.89
   3   4  -2  142.27    3.38
  -3  -4   2  140.27    3.00
   2   4  -2   15.85    1.94
   2   4  -2   10.15    1.41
   2   4  -2   15.81    1.50
   2   4  -2    8.74    1.73
  -2  -4   2   11.97    1.52
   1   4  -2   51.48    2.75
   1   4  -2   52.18    2.45
  -1  -4   2   50.80    2.29
   0   4  -2  170.33    3.68
   0  -4   2  164.96    3.44
   0  -4   2  166.87    3.96
  -1   4  -2  235.38    4.64
   1  -4   2  241.28    5.06
   1  -4   2  237.61    4.43
  -2   4  -2   22.03    2.25
   2  -4   2   26.01    2.18
   2  -4   2   25.14    2.56
  -3   4  -2    1.04    1.78
   3  -4   2   -0.48    0.67
   3  -4   2   -0.16    1.33
   3  -4   2   -1.51    1.55
  -4   4  -2    4.04    1.79
   4  -4   2    3.53    1.65
   4  -4   2    3.63    1.74
   4  -4   2    2.18    1.47
   4  -4   2    1.78    0.93
  -5   4  -2    3.54    1.91
   5  -4   2    1.60    1.77
   5  -4   2    3.32    1.95
   5  -4   2    2.50    1.23
   5  -4   2    1.86    1.75
  -6   4  -2  168.63    4.11
   6  -4   2  170.17    4.04
   6  -4   2  176.56    5.32
   6  -4   2  179.66    5.12
   6  -4   2  173.61    4.91
  -7   4  -2    4.11    1.93
   7  -4   2    5.18    1.81
   7  -4   2    4.65    2.23
   7  -4   2   -0.46    2.46
   7  -4   2    5.64    2.05
   8  -4   2   35.17    4.20
   8  -4   2   36.66    2.80
   8  -4   2   33.86    4.02
   8  -4   2   34.85    3.81
   9  -4   2   19.08    2.34
   9  -4   2   14.46    3.06
   9  -4   2   13.50    2.83
   9  -4   2   14.75    3.48
  10  -4   2    9.10    2.97
  10  -4   2    8.10    2.13
  10  -4   2   10.60    3.03
  11  -4   2    7.37    3.10
  11  -4   2   12.39    3.23
  11  -4   2    6.77    1.96
  12  -4   2   -1.02    3.00
  12  -4   2    2.95    3.04
  12  -4   2   -0.24    1.73
  13  -4   2    2.56    3.40
  14  -4   2   -0.75    3.59
  15  -4   2    2.84    4.03
  15   3  -2    6.14    4.80
  14   3  -2   20.40    4.79
  14   3  -2   24.88    3.80
  14   3  -2   10.65    3.80
  13   3  -2   13.45    4.28
  13   3  -2   13.91    3.27
  13   3  -2    3.38    3.32
  12   3  -2    5.46    2.76
  12   3  -2    0.94    3.00
  12   3  -2    4.73    4.18
  11   3  -2    3.40    3.63
  11   3  -2    2.67    2.76
  11   3  -2    4.71    2.57
  10   3  -2    3.13    2.54
  10   3  -2    3.65    1.12
  10   3  -2    3.58    2.41
  10   3  -2   -1.12    3.37
 -10  -3   2    3.49    2.01
   9   3  -2   -1.18    3.19
   9   3  -2    1.31    2.33
   9   3  -2    0.23    1.18
   9   3  -2    0.20    2.09
  -9  -3   2   -0.79    1.84
   8   3  -2    7.94    2.94
   8   3  -2    5.24    1.91
   8   3  -2    5.13    1.32
   8   3  -2    9.70    2.25
  -8  -3   2    8.78    1.90
   7   3  -2   16.70    1.96
   7   3  -2   15.86    1.61
   7   3  -2   16.71    2.90
   7   3  -2   14.32    2.08
  -7  -3   2   21.79    1.94
   6   3  -2    6.21    1.24
   6   3  -2    5.35    1.54
   6   3  -2    7.08    2.50
   6   3  -2    5.72    1.76
  -6  -3   2    8.59    1.60
   5   3  -2   13.92    1.59
   5   3  -2   16.93    2.50
   5   3  -2   16.33    1.40
   5   3  -2   13.34    1.75
  -5  -3   2   14.86    1.67
   4   3  -2    7.65    1.13
   4   3  -2    7.04    1.25
   4   3  -2    7.69    1.44
  -4  -3   2    9.34    1.35
   3   3  -2  103.49    2.82
   3   3  -2  100.53    2.29
   3   3  -2  100.88    3.08
  -3  -3   2   97.58    2.44
   2   3  -2    8.13    1.67
   2   3  -2    6.13    1.34
   2   3  -2    8.10    1.43
  -2  -3   2    7.94    1.41
   1   3  -2    4.19    1.30
   1   3  -2    5.35    1.36
   1   3  -2    4.24    1.07
  -1  -3   2    4.05    1.12
   0   3  -2    3.67    1.17
   0  -3   2    3.74    0.91
   0  -3   2    4.57    0.85
  -1   3  -2   18.52    1.74
   1  -3   2   19.80    1.96
   1  -3   2   18.56    1.58
  -2   3  -2   20.63    2.15
   2  -3   2   24.58    2.50
   2  -3   2   21.47    2.05
  -3   3  -2  129.81    3.18
   3  -3   2  138.58    2.83
   3  -3   2  130.72    2.91
   3  -3   2  135.18    3.49
  -4   3  -2    4.66    1.58
   4  -3   2    1.79    1.37
   4  -3   2    2.56    1.29
   4  -3   2    2.87    1.10
  -5   3  -2   15.12    1.89
   5  -3   2   14.06    2.27
   5  -3   2   12.61    1.60
   5  -3   2   12.16    1.70
   5  -3   2   11.20    1.94
   5  -3   2   12.53    1.76
  -6   3  -2   10.22    1.87
   6  -3   2   10.64    1.75
   6  -3   2    9.00    2.03
   6  -3   2   10.52    1.91
   6  -3   2    9.44    2.39
   7  -3   2    0.45    1.76
   7  -3   2    1.61    2.33
   7  -3   2    1.42    1.60
   7  -3   2    0.16    1.96
   8  -3   2    0.31    1.71
   8  -3   2    0.75    2.21
   8  -3   2   -2.85    2.65
   8  -3   2    2.19    2.03
   9  -3   2    5.41    2.50
   9  -3   2    4.93    2.59
   9  -3   2    6.50    1.89
   9  -3   2    7.15    3.24
  10  -3   2    5.10    2.83
  10  -3   2    3.44    2.69
  10  -3   2    3.28    3.39
  10  -3   2    6.36    1.82
  11  -3   2   54.39    5.26
  11  -3   2   44.53    2.47
  11  -3   2   45.13    5.18
  12  -3   2   29.73    3.79
  12  -3   2   28.83    3.85
  13  -3   2    8.73    3.31
  13  -3   2   -1.40    3.06
  14  -3   2    3.21    3.57
  15  -3   2   -5.25    3.64
  15   2  -2    1.49    4.37
  15   2  -2   -6.48    3.62
  14   2  -2   17.12    3.66
  14   2  -2    0.87    3.54
  14   2  -2    8.87    4.68
  13   2  -2    8.82    3.04
  13   2  -2   -3.64    3.08
  13   2  -2    1.31    3.89
  12   2  -2   24.10    3.62
  12   2  -2   35.85    4.85
  11   2  -2   68.97    5.06
  11   2  -2   54.86    1.80
  11   2  -2   56.68    5.20
  11   2  -2   44.38    5.14
  10   2  -2    2.01    3.58
  10   2  -2    7.29    1.47
  10   2  -2    5.66    2.78
  10   2  -2    7.22    2.52
 -10  -2   2    6.57    2.14
   9   2  -2    3.26    3.20
   9   2  -2    4.61    1.45
   9   2  -2    7.49    2.45
   9   2  -2    5.83    2.24
  -9  -2   2    5.85    1.92
   8   2  -2   23.97    2.49
   8   2  -2   24.17    3.47
   8   2  -2   25.56    2.01
   8   2  -2   30.83    3.62
  -8  -2   2   27.42    2.33
   7   2  -2    8.18    1.92
   7   2  -2    8.38    2.73
   7   2  -2    6.83    1.77
   7   2  -2    8.69    1.41
  -7  -2   2    9.03    1.68
   6   2  -2    2.93    1.67
   6   2  -2    1.18    1.21
   6   2  -2    0.31    2.32
   6   2  -2   -0.76    1.44
  -6  -2   2   -1.19    1.39
   5   2  -2   34.91    2.52
   5   2  -2   36.33    3.04
   5   2  -2   34.54    1.83
   5   2  -2   39.36    2.84
  -5  -2   2   36.74    1.99
   4   2  -2   20.09    2.27
   4   2  -2   19.86    1.40
   4   2  -2   17.06    2.00
   4   2  -2   21.00    2.33
  -4  -2   2   18.12    1.67
   3   2  -2  352.63    5.84
   3   2  -2  356.18    5.32
   3   2  -2  343.19    5.90
  -3  -2   2  346.21    5.45
   2   2  -2  526.07    7.75
   2   2  -2  509.13    7.81
   2   2  -2  529.03    7.36
  -2  -2   2  509.41    7.36
   1   2  -2   15.92    1.51
   1   2  -2   15.68    1.33
   1   2  -2   15.20    1.09
  -1  -2   2   16.16    1.11
   0   2  -2   70.81    1.86
   0   2  -2   70.57    1.64
   0  -2   2   71.64    1.55
   0  -2   2   71.20    1.81
  -1   2  -2   11.76    1.15
   1  -2   2    9.65    1.00
   1  -2   2    7.41    0.85
  -2   2  -2   31.91    1.97
   2  -2   2   34.27    1.90
   2  -2   2   37.47    2.14
   2  -2   2   33.22    1.83
  -3   2  -2  134.07    2.95
   3  -2   2  138.02    3.27
   3  -2   2  142.08    3.15
   3  -2   2  135.44    2.83
  -4   2  -2   16.92    1.54
   4  -2   2   17.10    2.12
   4  -2   2   16.57    1.96
   4  -2   2   16.23    1.64
   4  -2   2   14.68    1.99
   5  -2   2    5.36    1.58
   5  -2   2    3.87    1.59
   5  -2   2    4.03    2.06
   5  -2   2    6.41    1.47
   5  -2   2    4.75    1.37
   6  -2   2    3.28    2.28
   6  -2   2    4.80    1.59
   6  -2   2    4.95    1.44
   6  -2   2    4.12    1.74
   6  -2   2    6.38    1.75
   7  -2   2   60.62    2.32
   7  -2   2   66.74    3.57
   7  -2   2   63.40    3.89
   7  -2   2   67.25    3.76
   8  -2   2   39.32    2.27
   8  -2   2   36.69    3.85
   8  -2   2   41.76    4.08
   8  -2   2   42.29    3.69
   9  -2   2   -1.75    1.47
   9  -2   2   -0.49    2.17
   9  -2   2    1.24    2.33
   9  -2   2   -1.56    3.06
  10  -2   2    3.57    1.49
  10  -2   2    3.03    2.59
  10  -2   2    2.95    2.49
  10  -2   2   -0.88    3.69
  11  -2   2   19.80    3.21
  11  -2   2   25.68    4.33
  11  -2   2   17.63    3.17
  11  -2   2   18.41    1.66
  12  -2   2   12.60    3.07
  12  -2   2    2.61    2.95
  13  -2   2   -1.09    3.06
  13  -2   2    9.77    3.23
  14  -2   2   -0.48    3.34
  15  -2   2   -5.12    3.49
  15   1  -2   12.98    4.97
  15   1  -2   -0.66    3.89
  14   1  -2   -6.04    3.39
  14   1  -2    0.50    4.18
  13   1  -2    7.93    3.01
  13   1  -2   -1.20    3.21
  13   1  -2    4.08    3.94
  12   1  -2    0.93    3.02
  12   1  -2    6.17    2.79
  12   1  -2    5.47    3.86
  11   1  -2    4.49    2.57
  11   1  -2    0.19    2.75
  11   1  -2    3.74    1.50
  11   1  -2   -0.30    3.54
  10   1  -2    3.15    2.66
  10   1  -2   -2.42    3.39
  10   1  -2    1.48    2.42
  10   1  -2    3.12    1.62
   9   1  -2   23.30    2.30
   9   1  -2   28.68    3.92
   9   1  -2   31.73    4.27
   9   1  -2   32.85    4.00
  -9  -1   2   28.19    2.58
   8   1  -2   15.33    3.20
   8   1  -2   20.41    2.12
   8   1  -2   12.22    2.18
   8   1  -2   19.70    2.54
  -8  -1   2   20.87    2.12
   7   1  -2   55.39    3.42
   7   1  -2   56.75    3.61
   7   1  -2   55.84    2.31
   7   1  -2   58.20    3.94
  -7  -1   2   58.07    2.61
   6   1  -2  206.69    4.99
   6   1  -2  202.68    5.49
   6   1  -2  198.48    3.90
   6   1  -2  205.88    5.09
  -6  -1   2  197.13    4.19
   5   1  -2   49.18    3.20
   5   1  -2   51.54    1.98
   5   1  -2   48.93    2.78
   5   1  -2   54.14    3.02
  -5  -1   2   49.87    2.18
  -5  -1   2   48.78    2.07
   4   1  -2    7.07    1.98
   4   1  -2    4.63    1.27
   4   1  -2    6.85    1.41
   4   1  -2    6.17    1.24
  -4  -1   2    8.94    1.34
  -4  -1   2    8.32    1.36
   3   1  -2  173.94    3.81
   3   1  -2  181.11    3.29
  -3  -1   2  172.38    3.42
   2   1  -2   32.25    2.10
   2   1  -2   27.87    1.47
   2   1  -2   27.79    1.82
  -2  -1   2   26.97    1.40
   1   1  -2   15.05    0.82
   1   1  -2   16.13    1.12
   1   1  -2   15.81    0.98
  -1  -1   2   15.98    0.93
   0   1  -2   31.14    1.09
   0  -1   2   34.69    1.12
   0  -1   2   32.43    0.86
   0  -1   2   33.21    1.16
  -1   1  -2  172.66    2.73
   1  -1   2  176.49    2.87
   1  -1   2  172.92    2.65
   1  -1   2  181.45    2.84
  -2   1  -2   20.39    2.01
   2  -1   2   19.45    1.86
   2  -1   2   20.70    1.30
   2  -1   2   24.07    1.43
   2  -1   2   20.24    1.37
   2  -1   2   21.94    1.63
   3  -1   2  156.57    3.76
   3  -1   2  165.33    3.75
   3  -1   2  167.32    3.16
   3  -1   2  159.12    3.01
   3  -1   2  157.87    2.81
   4  -1   2  193.44    4.42
   4  -1   2  196.18    3.76
   4  -1   2  184.84    3.54
   4  -1   2  194.57    4.43
   4  -1   2  187.79    3.24
   5  -1   2   -3.75    1.91
   5  -1   2    0.75    1.65
   5  -1   2    0.94    1.16
   5  -1   2   -1.28    1.08
   5  -1   2   -1.08    1.30
   6  -1   2   28.11    3.18
   6  -1   2   33.35    2.77
   6  -1   2   27.35    1.98
   6  -1   2   32.30    2.66
   6  -1   2   31.46    1.69
   6  -1   2   30.31    3.27
   7  -1   2    1.34    1.15
   7  -1   2    0.54    1.64
   7  -1   2    2.15    1.56
   7  -1   2    1.84    2.41
   7  -1   2    1.54    1.56
   8  -1   2    1.01    1.91
   8  -1   2    1.82    1.68
   8  -1   2   -0.53    1.17
   8  -1   2   -3.87    2.63
   8  -1   2    1.53    1.80
   8  -1   2   -0.85    1.46
   9  -1   2    7.73    2.33
   9  -1   2    9.82    3.50
   9  -1   2    7.16    1.26
   9  -1   2   11.82    3.34
   9  -1   2    9.35    1.30
   9  -1   2    6.65    2.37
  10  -1   2   41.00    4.42
  10  -1   2   43.54    4.56
  10  -1   2   39.50    4.57
  10  -1   2   34.53    1.38
  11  -1   2    6.93    2.70
  11  -1   2    4.69    3.95
  11  -1   2    2.54    2.60
  12  -1   2    4.46    3.98
  12  -1   2    8.20    2.99
  12  -1   2    8.77    2.90
  13  -1   2    7.73    3.05
  13  -1   2    0.53    3.05
  14  -1   2    1.07    3.31
  14  -1   2   12.51    3.35
  15  -1   2   -2.98    3.47
  15   0  -2   -4.12    3.73
  15   0  -2    5.92    4.44
  14   0  -2   -2.59    3.44
  14   0  -2    2.24    4.02
  13   0  -2   17.85    4.75
  13   0  -2   26.66    3.74
  13   0  -2   16.52    3.93
  12   0  -2   17.48    4.33
  12   0  -2   24.81    3.46
  12   0  -2   21.91    2.14
  12   0  -2   12.07    3.47
  11   0  -2    4.88    1.77
  11   0  -2    0.11    2.76
  11   0  -2    5.21    2.59
  11   0  -2    2.34    3.63
  10   0  -2   40.52    4.82
  10   0  -2   34.22    2.64
  10   0  -2   36.63    4.40
  10   0  -2   38.48    4.56
   9   0  -2   33.20    3.97
   9   0  -2   32.70    2.56
   9   0  -2   30.15    3.91
   9   0  -2   32.42    4.31
   8   0  -2   -3.99    2.69
   8   0  -2    0.46    1.96
   8   0  -2   -0.53    1.58
   8   0  -2    2.86    2.13
  -8   0   2    2.21    1.74
   7   0  -2   -0.17    1.54
   7   0  -2    0.13    2.50
   7   0  -2    2.81    1.94
   7   0  -2    1.55    1.73
  -7   0   2    2.33    1.65
   6   0  -2    5.36    1.76
   6   0  -2    5.45    2.48
   6   0  -2   10.20    1.99
   6   0  -2    8.66    1.63
  -6   0   2    9.60    1.74
  -6   0   2   11.34    1.77
   5   0  -2    2.29    2.23
   5   0  -2    1.45    1.50
   5   0  -2   -0.20    1.34
   5   0  -2    2.55    1.60
  -5   0   2    0.86    1.41
  -5   0   2    1.90    1.49
   4   0  -2   73.18    2.23
   4   0  -2   75.03    2.97
   4   0  -2   71.07    2.81
   4   0  -2   71.79    2.95
  -4   0   2   69.18    2.25
  -4   0   2   72.02    2.33
   3   0  -2  274.99    4.45
   3   0  -2  271.97    5.18
   3   0  -2  267.68    5.08
  -3   0   2  272.96    4.64
  -3   0   2  263.26    4.59
   2   0  -2    1.43    1.08
   2   0  -2   -1.22    0.95
   2   0  -2   -0.04    1.03
  -2   0   2    0.24    1.06
   1   0  -2   46.55    1.40
   1   0  -2   49.90    1.17
   1   0  -2   47.68    1.42
  -1   0   2   45.96    1.35
  -1   0   2   45.81    1.18
   0   0   2  404.78    5.42
   0   0   2  370.89    5.23
   1   0   2    0.83    0.59
   1   0   2    0.48    0.32
   2   0   2   28.24    0.71
   2   0   2   28.62    0.73
   2   0   2   26.71    2.24
   2   0   2   28.19    1.10
   3   0   2   28.06    0.97
   3   0   2   27.33    2.72
   3   0   2   28.23    0.93
   3   0   2   26.23    2.30
   3   0   2   24.98    1.38
   4   0   2   37.29    1.13
   4   0   2   37.94    1.56
   4   0   2   36.98    2.58
   4   0   2   38.27    1.14
   4   0   2   36.95    2.56
   4   0   2   41.29    1.53
   5   0   2    0.91    1.01
   5   0   2    0.15    1.15
   5   0   2    0.00    0.77
   5   0   2    1.94    2.04
   5   0   2   -0.22    0.77
   5   0   2    2.01    1.82
   6   0   2   77.36    4.22
   6   0   2   74.18    1.71
   6   0   2   77.66    4.14
   6   0   2   79.83    2.94
   6   0   2   81.58    2.95
   6   0   2   76.26    1.77
   6   0   2   79.42    2.48
   7   0   2   44.93    2.90
   7   0   2   40.60    2.90
   7   0   2   38.57    3.63
   7   0   2   39.63    2.14
   7   0   2   40.05    1.32
   7   0   2   36.23    1.29
   8   0   2    1.74    1.71
   8   0   2   -1.01    1.73
   8   0   2   -2.17    2.73
   8   0   2   -0.76    0.70
   8   0   2    0.43    1.51
   8   0   2    1.34    0.73
   9   0   2   17.15    2.44
   9   0   2   20.98    3.75
   9   0   2   18.15    2.42
  10   0   2    2.34    2.32
  10   0   2   -0.31    3.40
  10   0   2    3.23    2.37
  11   0   2    8.77    2.59
  11   0   2    3.47    2.57
  11   0   2    6.73    3.71
  12   0   2    6.09    4.01
  12   0   2    7.01    2.71
  12   0   2    4.89    2.82
  13   0   2    4.33    3.00
  13   0   2   11.28    2.99
  14   0   2    9.28    3.08
  14   0   2   -1.74    3.09
  15   0   2    2.37    3.49
  15  -1  -2    3.28    4.26
  15  -1  -2   -6.59    3.76
  14  -1  -2   -4.23    3.51
  14  -1  -2    8.56    4.50
  13  -1  -2   17.12    4.66
  13  -1  -2   25.33    5.47
  13  -1  -2   14.64    3.93
  12  -1  -2    0.62    3.75
  12  -1  -2    6.89    1.85
  12  -1  -2    8.06    3.04
  12  -1  -2    0.22    3.16
  11  -1  -2    1.81    3.55
  11  -1  -2   -2.52    2.81
  11  -1  -2    3.39    1.89
  11  -1  -2    3.01    2.71
  10  -1  -2    0.60    2.01
  10  -1  -2   -3.37    3.26
  10  -1  -2    2.27    2.55
  10  -1  -2   -0.67    2.60
   9  -1  -2    2.42    2.34
   9  -1  -2   -0.78    3.32
   9  -1  -2    2.02    1.92
   9  -1  -2    4.35    2.54
   8  -1  -2    5.14    2.22
   8  -1  -2    4.82    2.15
   8  -1  -2    6.22    1.92
   8  -1  -2    1.37    2.79
   7  -1  -2  100.92    4.42
   7  -1  -2  100.08    3.24
   7  -1  -2  103.98    4.44
   7  -1  -2  101.42    4.33
  -7   1   2   98.54    3.19
   6  -1  -2   78.28    2.78
   6  -1  -2   75.62    4.12
   6  -1  -2   77.46    3.88
   6  -1  -2   78.96    3.75
  -6   1   2   74.32    2.68
  -6   1   2   75.74    2.88
   5  -1  -2   65.65    3.25
   5  -1  -2   63.14    2.44
   5  -1  -2   66.01    3.37
   5  -1  -2   63.99    3.26
  -5   1   2   59.21    2.41
  -5   1   2   61.44    2.37
   4  -1  -2   39.16    2.74
   4  -1  -2   37.74    2.65
   4  -1  -2   36.16    2.50
   4  -1  -2   35.65    2.02
  -4   1   2   36.20    1.88
  -4   1   2   38.09    2.08
   3  -1  -2   10.83    1.65
   3  -1  -2    7.01    1.62
   3  -1  -2   10.94    1.55
  -3   1   2    9.40    1.52
  -3   1   2   10.49    1.67
   2  -1  -2   22.65    1.53
   2  -1  -2   28.96    2.08
   2  -1  -2   25.68    2.13
  -2   1   2   23.54    1.81
  -2   1   2   25.30    1.55
   1  -1  -2    0.85    0.65
   1  -1  -2   -0.07    0.65
  -1   1   2    0.00    0.62
  -1   1   2    1.12    0.64
   0  -1  -2   38.05    0.88
   0   1   2   37.48    1.16
   0   1   2   37.73    1.06
   0   1   2   37.72    1.02
   1   1   2   28.18    1.51
   2   1   2  306.29    5.23
   2   1   2  321.80    5.68
   3   1   2  134.60    3.52
   3   1   2  137.78    3.89
   3   1   2  131.53    2.12
  -4  -1  -2    4.39    0.75
   4   1   2    5.63    0.90
   4   1   2    2.74    1.61
   4   1   2    4.38    1.82
  -5  -1  -2   36.03    1.46
   5   1   2   37.97    1.58
   5   1   2   37.57    1.55
   5   1   2   34.39    2.99
   5   1   2   39.24    3.26
  -6  -1  -2    9.12    1.22
   6   1   2    7.08    2.28
   6   1   2    7.61    2.48
   6   1   2    8.80    1.23
   6   1   2    8.78    1.22
   6   1   2    9.63    1.40
   7   1   2   10.10    2.85
   7   1   2    9.05    1.53
   7   1   2   12.01    1.56
   7   1   2   11.58    1.53
   8   1   2    3.36    1.69
   8   1   2    1.49    2.94
   8   1   2    5.07    1.73
   9   1   2   15.70    2.32
   9   1   2   16.23    3.62
   9   1   2   13.17    2.21
  10   1   2    6.89    3.93
  10   1   2    8.86    2.39
  10   1   2    7.21    2.30
  11   1   2    2.40    2.41
  11   1   2    4.91    3.73
  11   1   2    7.75    2.43
  12   1   2   40.42    4.66
  12   1   2   41.01    5.44
  12   1   2   33.00    3.59
  13   1   2   13.25    4.43
  13   1   2   14.21    3.02
  13   1   2    6.30    3.06
  14   1   2   14.15    3.19
  14   1   2    2.47    3.19
  15   1   2   -4.40    3.21
  15   1   2   14.67    3.51
  15  -2  -2   -7.74    3.75
  15  -2  -2    4.83    4.77
  14  -2  -2   -0.31    3.69
  14  -2  -2    8.15    4.50
  13  -2  -2    3.30    1.92
  13  -2  -2    8.38    4.03
  13  -2  -2    3.36    3.58
  12  -2  -2    1.67    3.16
  12  -2  -2    5.51    2.04
  12  -2  -2    4.38    3.85
  12  -2  -2    9.85    3.06
  11  -2  -2   25.84    4.28
  11  -2  -2   22.13    3.71
  11  -2  -2   27.99    3.61
  11  -2  -2   30.30    3.05
  10  -2  -2    8.43    2.41
  10  -2  -2   10.85    2.85
  10  -2  -2    7.20    3.58
  10  -2  -2    9.28    3.10
   9  -2  -2    2.03    2.56
   9  -2  -2    2.56    2.55
   9  -2  -2    2.01    2.11
   9  -2  -2    0.46    2.93
   8  -2  -2   18.09    2.66
   8  -2  -2   19.37    2.31
   8  -2  -2   21.27    3.25
   8  -2  -2   15.86    2.70
  -8   2   2   24.40    2.42
   7  -2  -2   25.40    3.06
   7  -2  -2   23.85    2.45
   7  -2  -2   21.07    2.52
   7  -2  -2   26.62    3.46
  -7   2   2   25.72    2.30
   6  -2  -2   -0.18    1.73
   6  -2  -2    2.55    2.22
   6  -2  -2    2.85    1.85
   6  -2  -2    2.30    1.92
  -6   2   2    2.87    1.82
   5  -2  -2   96.74    3.57
   5  -2  -2   98.06    3.92
   5  -2  -2   87.60    3.72
   5  -2  -2   93.67    3.04
  -5   2   2   88.19    2.83
   4  -2  -2   18.53    2.11
   4  -2  -2   17.14    1.81
   4  -2  -2   14.51    1.82
   4  -2  -2   15.63    1.85
  -4   2   2   16.87    1.76
   3  -2  -2   33.86    2.36
   3  -2  -2   27.22    2.23
   3  -2  -2   34.85    2.75
   3  -2  -2   28.37    2.77
  -3   2   2   23.81    2.28
   2  -2  -2  153.26    3.83
   2  -2  -2  156.83    3.80
   2  -2  -2  156.59    3.24
  -2   2   2  153.49    3.37
   1  -2  -2  123.16    2.39
   1  -2  -2  116.33    2.67
  -1   2   2  124.56    2.81
  -1   2   2  120.33    2.46
   0  -2  -2   53.42    1.25
   0   2   2   55.79    1.52
   0   2   2   56.04    1.63
   0   2   2   53.15    1.34
   0   2   2   54.35    1.54
  -1  -2  -2   25.03    0.78
   1   2   2   25.37    0.72
   1   2   2   24.61    1.86
   2   2   2    6.35    1.84
   2   2   2    6.39    1.67
   3   2   2   39.01    2.38
   3   2   2   47.58    3.04
   4   2   2   32.98    2.50
   4   2   2   29.64    1.04
   4   2   2   32.53    2.96
  -5  -2  -2  121.05    2.35
   5   2   2  128.75    4.22
   5   2   2  129.86    4.98
  -6  -2  -2    0.35    0.99
   6   2   2    0.60    2.30
   6   2   2    0.82    0.87
   6   2   2    1.00    0.88
   6   2   2   -2.66    2.27
  -7  -2  -2   12.34    1.34
   7   2   2    8.63    1.35
   7   2   2   10.67    1.40
   7   2   2    9.91    2.79
  -8  -2  -2   34.22    1.93
   8   2   2   40.73    2.96
   8   2   2   38.68    3.91
   8   2   2   35.51    2.78
   9   2   2    6.19    1.98
   9   2   2    4.95    1.90
   9   2   2    3.83    3.20
  10   2   2    2.07    2.18
  10   2   2    2.92    2.02
  10   2   2   -3.96    3.28
  11   2   2    2.13    2.34
  11   2   2    3.87    2.23
  11   2   2    2.66    3.62
  12   2   2   -2.98    2.41
  12   2   2    2.77    2.38
  12   2   2   -0.46    3.83
  13   2   2    4.56    4.36
  13   2   2    5.83    2.65
  13   2   2   -3.31    2.69
  14   2   2    1.04    3.10
  14   2   2    8.83    3.04
  15   2   2   -4.05    3.20
  15  -3  -2   21.11    5.39
  15  -3  -2   15.35    4.68
  14  -3  -2    2.36    4.43
  14  -3  -2   -0.28    3.87
  13  -3  -2    2.93    4.09
  13  -3  -2    6.43    2.17
  13  -3  -2   -2.33    3.42
  12  -3  -2    6.24    3.33
  12  -3  -2    7.61    2.37
  12  -3  -2   13.56    3.87
  12  -3  -2    6.39    3.82
  11  -3  -2    1.89    3.43
  11  -3  -2    4.30    2.76
  11  -3  -2    0.13    2.95
  11  -3  -2    2.29    2.31
  10  -3  -2    0.45    2.78
  10  -3  -2   -0.22    3.24
  10  -3  -2    4.22    2.78
  10  -3  -2    2.91    2.39
   9  -3  -2   41.81    4.76
   9  -3  -2   40.81    3.17
   9  -3  -2   37.87    4.72
   9  -3  -2   39.59    4.29
   8  -3  -2   55.62    3.19
   8  -3  -2   57.06    4.47
   8  -3  -2   54.97    4.02
   8  -3  -2   55.44    4.48
  -8   3   2   56.76    2.98
   7  -3  -2   26.83    2.64
   7  -3  -2   21.97    2.59
   7  -3  -2   28.22    3.17
   7  -3  -2   23.05    2.68
  -7   3   2   25.58    2.54
   6  -3  -2   58.63    3.86
   6  -3  -2   64.93    3.07
   6  -3  -2   64.79    3.44
   6  -3  -2   66.51    3.95
  -6   3   2   60.95    2.99
   5  -3  -2    1.48    1.87
   5  -3  -2    1.39    1.80
   5  -3  -2    2.14    1.77
   5  -3  -2    1.76    2.06
  -5   3   2    1.55    1.96
   4  -3  -2   21.05    2.09
   4  -3  -2   18.18    2.00
   4  -3  -2   18.21    2.07
   4  -3  -2   13.10    1.79
  -4   3   2   21.20    2.07
   3  -3  -2    4.73    1.53
   3  -3  -2    1.24    1.60
   3  -3  -2    1.25    1.52
   3  -3  -2    2.66    1.48
  -3   3   2    3.18    1.91
   2  -3  -2  105.07    2.96
  -2   3   2  105.12    3.63
  -2   3   2  101.41    3.06
   1  -3  -2    0.95    1.17
   1  -3  -2   -1.87    1.28
  -1   3   2   -0.01    0.89
  -1   3   2   -1.13    1.54
  -1   3   2   -0.92    1.42
   0  -3  -2   83.08    1.93
   0   3   2   88.16    2.38
   0   3   2   85.21    2.08
   0   3   2   86.59    2.48
   0   3   2   88.05    2.56
  -1  -3  -2  127.84    2.25
   1   3   2  127.33    3.61
   1   3   2  122.67    2.45
   1   3   2  132.29    2.43
   1   3   2  129.88    2.47
  -2  -3  -2   22.48    1.02
   2   3   2   25.23    1.96
   2   3   2   28.64    1.18
   2   3   2   33.43    3.08
   3   3   2  177.15    4.75
   3   3   2  175.09    3.92
   3   3   2  178.74    2.60
   4   3   2   28.33    2.47
   4   3   2   29.50    3.18
   5   3   2    2.58    2.20
   5   3   2    1.40    2.05
  -6  -3  -2    8.08    1.09
   6   3   2    7.85    2.47
   6   3   2    8.43    1.07
   6   3   2    6.72    2.39
  -7  -3  -2   -0.42    1.05
   7   3   2    0.03    1.06
   7   3   2    1.33    1.12
   7   3   2   -2.25    2.42
  -8  -3  -2    8.36    1.38
   8   3   2    9.14    1.63
   8   3   2    7.09    1.48
   8   3   2    7.74    3.28
  -9  -3  -2    3.35    1.75
   9   3   2    1.25    3.26
   9   3   2    1.01    1.77
   9   3   2   -1.32    1.66
  10   3   2   14.84    3.83
  10   3   2   13.94    2.35
  10   3   2   14.04    2.23
  11   3   2   15.45    4.07
  11   3   2   16.24    2.44
  11   3   2   14.91    2.66
  12   3   2    4.24    3.80
  12   3   2    2.48    2.30
  12   3   2   -0.16    2.44
  13   3   2    2.09    4.06
  13   3   2   -2.96    2.58
  13   3   2    4.88    2.61
  14   3   2   -5.14    2.89
  14   3   2   10.17    3.05
  15   3   2   -2.75    3.22
  15   3   2   14.35    3.50
  15  -4  -2   -3.99    4.05
  14  -4  -2    6.83    4.62
  14  -4  -2   -0.77    3.92
  13  -4  -2    6.47    4.28
  13  -4  -2   -3.91    3.53
  13  -4  -2    4.12    2.30
  12  -4  -2   19.76    4.01
  12  -4  -2   27.68    2.95
  12  -4  -2   29.01    4.72
  11  -4  -2    2.14    3.13
  11  -4  -2    1.09    3.65
  11  -4  -2   -0.30    2.32
  11  -4  -2    5.67    3.03
  10  -4  -2   -0.04    3.50
  10  -4  -2    4.29    2.85
  10  -4  -2    0.13    2.40
  10  -4  -2    0.49    2.89
   9  -4  -2   35.46    3.38
   9  -4  -2   28.34    3.50
   9  -4  -2   35.83    4.12
   9  -4  -2   36.42    4.86
  -9   4   2   37.30    5.00
   8  -4  -2    0.70    2.37
   8  -4  -2   -0.71    1.94
   8  -4  -2    2.00    2.32
   8  -4  -2   -0.47    2.47
  -8   4   2    1.79    2.16
   7  -4  -2    1.21    2.35
   7  -4  -2   -2.18    2.03
   7  -4  -2    2.99    2.23
   7  -4  -2    0.67    2.03
  -7   4   2    1.31    2.12
   6  -4  -2    7.57    2.36
   6  -4  -2    6.04    2.16
   6  -4  -2    7.30    2.13
   6  -4  -2    8.23    2.02
  -6   4   2    8.34    2.33
   5  -4  -2    2.48    2.03
   5  -4  -2    0.65    1.88
   5  -4  -2    2.91    2.07
   5  -4  -2    0.30    1.83
  -5   4   2    0.79    1.93
   4  -4  -2   11.52    1.90
   4  -4  -2   11.69    1.68
   4  -4  -2    7.28    1.83
   4  -4  -2    7.57    1.87
  -4   4   2    9.49    2.02
   3  -4  -2  238.66    6.21
   3  -4  -2  231.40    4.27
   3  -4  -2  224.67    4.53
   3  -4  -2  226.12    5.17
  -3   4   2  217.06    4.65
   2  -4  -2   81.20    2.80
   2  -4  -2   83.65    3.43
   2  -4  -2   82.41    2.15
  -2   4   2   77.36    3.42
  -2   4   2   78.73    2.86
  -2   4   2   81.74    2.04
   1  -4  -2   44.32    2.85
   1  -4  -2   39.89    2.39
  -1   4   2   43.26    2.50
  -1   4   2   43.46    2.21
  -1   4   2   42.42    3.28
   0  -4  -2  168.20    3.37
   0   4   2  168.14    3.70
   0   4   2  170.96    4.12
   0   4   2  172.94    3.91
   0   4   2  180.27    4.07
  -1  -4  -2   -2.51    1.27
   1   4   2   -0.20    1.44
   1   4   2   -1.71    1.05
   1   4   2   -2.00    1.15
   1   4   2   -0.33    1.68
   1   4   2   -0.80    1.02
  -2  -4  -2   -1.14    0.90
   2   4   2   -0.82    0.57
   2   4   2   -1.20    0.57
   2   4   2   -0.51    0.64
   2   4   2    0.57    1.73
   2   4   2   -0.71    1.30
   2   4   2   -1.48    1.03
  -3  -4  -2   36.47    1.18
   3   4   2   35.74    2.16
   3   4   2   33.94    1.30
   3   4   2   38.48    3.22
   4   4   2   62.36    3.16
   4   4   2   67.88    1.65
   4   4   2   66.75    3.90
   5   4   2    0.12    2.07
   5   4   2    0.35    2.29
  -6  -4  -2   31.30    1.53
   6   4   2   38.07    4.09
   6   4   2   29.59    3.16
  -7  -4  -2   19.84    1.54
   7   4   2   22.18    1.74
   7   4   2   25.80    3.21
   7   4   2   27.19    1.91
  -8  -4  -2   13.62    1.46
   8   4   2   11.30    1.49
   8   4   2   14.14    3.29
   8   4   2   11.33    1.61
   9   4   2    4.17    3.34
   9   4   2    7.68    1.94
   9   4   2    4.06    1.68
  10   4   2   -4.01    3.28
  10   4   2    3.32    2.03
  10   4   2    1.31    1.77
  11   4   2    0.47    2.20
  11   4   2   -3.51    3.41
  11   4   2    2.71    1.99
  12   4   2    1.68    2.53
  12   4   2    2.72    3.73
  12   4   2    6.07    2.35
  13   4   2    1.01    2.71
  13   4   2   11.27    2.79
  13   4   2    3.06    3.99
  14   4   2   -2.75    2.85
  15   4   2   -1.21    3.25
  15   4   2   17.87    3.56
  15  -5  -2   -0.28    4.37
  14  -5  -2    0.79    3.91
  14  -5  -2   -2.34    3.80
  14  -5  -2    8.59    2.43
  13  -5  -2    0.53    3.61
  13  -5  -2    3.86    2.57
  13  -5  -2    4.36    3.79
  12  -5  -2    7.67    2.72
  12  -5  -2    5.30    3.70
  12  -5  -2    2.71    3.64
  11  -5  -2   -0.85    3.10
  11  -5  -2    0.08    3.30
  11  -5  -2   -2.31    2.50
  10  -5  -2    1.64    2.81
  10  -5  -2   -0.54    2.69
  10  -5  -2   -0.59    2.93
  10  -5  -2    1.08    3.14
   9  -5  -2   60.64    4.98
   9  -5  -2   61.84    5.53
   9  -5  -2   63.97    4.04
   9  -5  -2   68.16    5.54
  -9   5   2   65.59    3.92
   8  -5  -2    9.90    2.97
   8  -5  -2    6.92    2.72
   8  -5  -2    6.49    2.56
   8  -5  -2    5.06    2.62
  -8   5   2    8.75    2.53
   7  -5  -2   41.49    3.34
   7  -5  -2   48.90    3.36
   7  -5  -2   47.22    4.29
   7  -5  -2   49.87    4.40
  -7   5   2   51.38    3.28
   6  -5  -2   98.18    3.88
   6  -5  -2   94.24    3.53
   6  -5  -2   90.12    4.54
   6  -5  -2   93.56    4.55
  -6   5   2   87.68    3.70
   5  -5  -2   25.84    2.66
   5  -5  -2   29.49    3.67
   5  -5  -2   28.49    3.23
   5  -5  -2   28.43    2.72
  -5   5   2   30.95    3.05
   4  -5  -2  105.37    4.19
   4  -5  -2  105.04    3.44
   4  -5  -2  110.78    3.18
   4  -5  -2  106.80    4.16
  -4   5   2  108.91    3.54
   3  -5  -2   13.00    1.41
   3  -5  -2   12.67    1.86
   3  -5  -2   14.87    1.99
  -3   5   2   14.05    2.20
  -3   5   2   13.16    1.06
  -3   5   2   12.35    1.98
   2  -5  -2   16.53    1.26
   2  -5  -2   17.34    1.80
   2  -5  -2   17.14    2.36
  -2   5   2   22.60    2.33
  -2   5   2   14.94    1.98
  -2   5   2   16.52    1.43
   1  -5  -2   26.91    0.73
   1  -5  -2   26.47    2.27
  -1   5   2   27.84    2.01
  -1   5   2   27.67    2.82
  -1   5   2   27.14    2.31
   0  -5  -2  140.46    3.23
   0   5   2  138.77    3.32
   0   5   2  145.38    3.62
   0   5   2  144.42    3.95
   0   5   2  141.45    3.69
  -1  -5  -2   27.18    1.85
   1   5   2   28.67    2.32
   1   5   2   32.47    1.98
   1   5   2   33.41    3.09
   1   5   2   29.97    1.48
   1   5   2   28.84    1.95
  -2  -5  -2  103.79    2.33
   2   5   2  106.45    2.77
   2   5   2  106.84    2.48
   2   5   2  111.82    2.61
   2   5   2  112.79    2.55
   2   5   2  119.36    4.02
  -3  -5  -2  200.04    3.29
   3   5   2  194.32    3.45
   3   5   2  196.98    2.74
   3   5   2  198.23    2.74
   3   5   2  198.31    4.18
   3   5   2  201.55    3.19
   3   5   2  199.98    3.19
   3   5   2  196.04    5.37
  -4  -5  -2   64.89    1.69
   4   5   2   72.82    4.28
   4   5   2   65.85    2.98
   4   5   2   66.39    1.94
  -5  -5  -2   46.06    1.60
   5   5   2   44.55    3.05
   5   5   2   49.09    4.28
  -6  -5  -2   13.75    1.39
   6   5   2   18.07    2.93
   6   5   2   14.24    2.62
   6   5   2   12.35    0.99
  -7  -5  -2   10.74    1.31
   7   5   2    9.02    1.08
   7   5   2   12.02    2.85
   7   5   2   13.35    1.82
  -8  -5  -2   -1.18    1.22
   8   5   2   -1.15    2.79
   8   5   2    1.98    1.45
   8   5   2   -0.93    1.20
   9   5   2    3.70    1.62
   9   5   2    2.34    3.44
   9   5   2    5.79    1.86
  10   5   2    3.16    3.77
  10   5   2    6.04    1.87
  10   5   2    6.59    2.18
  11   5   2    5.84    2.32
  11   5   2   14.34    4.00
  11   5   2    9.99    2.19
  12   5   2   11.02    4.09
  12   5   2    9.12    2.71
  12   5   2   17.40    2.68
  13   5   2   12.24    3.15
  13   5   2   23.33    3.15
  13   5   2   18.54    4.88
  14   5   2   -3.95    2.85
  14   5   2    4.68    4.26
  15   5   2   11.80    3.35
  15   5   2   -4.92    3.14
  15  -6  -2   -6.95    4.27
  14  -6  -2   -3.84    3.98
  14  -6  -2    7.10    2.69
  13  -6  -2    7.95    2.83
  13  -6  -2    4.00    4.06
  13  -6  -2    1.95    3.83
  12  -6  -2    0.11    2.76
  12  -6  -2    2.50    3.82
  12  -6  -2    0.48    3.44
  11  -6  -2   35.96    4.46
  11  -6  -2   33.82    4.50
  11  -6  -2   41.14    4.16
  10  -6  -2   10.06    3.43
  10  -6  -2   12.89    3.05
  10  -6  -2   11.47    3.44
  10  -6  -2   15.67    3.35
   9  -6  -2    6.86    3.09
   9  -6  -2    5.12    3.34
   9  -6  -2    5.41    3.06
   9  -6  -2    4.79    3.04
  -9   6   2   11.89    3.04
   8  -6  -2    3.61    2.57
   8  -6  -2    3.11    2.57
   8  -6  -2    8.35    2.86
   8  -6  -2    5.79    2.78
  -8   6   2    8.12    2.82
   7  -6  -2    2.72    2.38
   7  -6  -2    2.51    2.36
   7  -6  -2    5.64    2.46
   7  -6  -2    1.82    2.21
  -7   6   2    2.26    2.28
   6  -6  -2    3.32    2.16
   6  -6  -2    5.89    2.36
   6  -6  -2    4.01    2.16
   6  -6  -2    2.32    2.03
  -6   6   2    4.58    2.48
   5  -6  -2   96.24    3.69
   5  -6  -2  103.59    3.48
   5  -6  -2   95.57    4.69
   5  -6  -2  100.04    4.68
  -5   6   2   96.30    3.71
   4  -6  -2   36.43    2.33
   4  -6  -2   33.79    2.79
   4  -6  -2   35.46    3.40
  -4   6   2   34.80    1.08
  -4   6   2   29.07    2.79
   3  -6  -2    8.87    1.25
   3  -6  -2    7.49    1.85
   3  -6  -2    8.97    1.97
  -3   6   2    5.10    1.93
  -3   6   2   10.99    2.28
  -3   6   2    7.99    1.04
   2  -6  -2   10.93    1.05
   2  -6  -2   12.75    1.99
   2  -6  -2    9.09    1.68
  -2   6   2    9.03    1.92
  -2   6   2   12.93    2.27
  -2   6   2   10.23    1.01
   1  -6  -2   96.72    2.99
  -1   6   2   97.92    3.78
  -1   6   2   98.30    2.88
  -1   6   2   89.65    3.05
  -1   6   2   87.03    4.04
   0  -6  -2   18.14    1.76
   0   6   2   17.66    2.30
   0   6   2   20.57    2.18
   0   6   2   13.24    1.64
   0   6   2   12.24    1.76
  -1  -6  -2    3.47    1.41
   1   6   2    2.48    1.56
   1   6   2    2.87    1.40
   1   6   2    3.61    1.63
   1   6   2    2.63    1.21
   1   6   2    3.40    0.91
  -2  -6  -2   -0.28    1.10
   2   6   2   -1.09    1.41
   2   6   2    1.30    1.82
   2   6   2   -0.11    0.95
   2   6   2    0.00    1.13
   2   6   2    0.39    1.12
  -3  -6  -2    1.28    1.08
   3   6   2   -0.51    1.32
   3   6   2    3.12    2.03
   3   6   2    0.24    0.85
   3   6   2   -0.03    0.70
   3   6   2    1.11    1.51
   3   6   2   -0.33    0.96
  -4  -6  -2    1.46    1.06
   4   6   2    3.22    2.31
   4   6   2   -0.87    1.88
   4   6   2    0.33    0.79
   4   6   2   -0.07    0.83
   4   6   2   -0.77    1.37
  -5  -6  -2   -0.10    1.04
   5   6   2    4.87    2.61
   5   6   2    0.49    0.76
   5   6   2   -0.72    0.70
   5   6   2    2.20    1.98
   5   6   2    0.49    1.29
  -6  -6  -2   29.50    1.69
   6   6   2   32.72    3.18
   6   6   2   31.96    1.57
  -7  -6  -2   -0.29    1.16
   7   6   2    2.72    2.61
   7   6   2   -0.36    1.02
  -8  -6  -2   40.23    2.11
   8   6   2   49.47    4.43
   8   6   2   43.00    2.56
   8   6   2   49.55    2.94
   9   6   2   24.05    4.03
   9   6   2   33.44    3.38
   9   6   2   25.68    2.85
  10   6   2    0.75    2.05
  10   6   2    0.23    1.73
  10   6   2   -2.81    3.19
  11   6   2    3.25    3.57
  11   6   2    4.45    2.09
  11   6   2    3.37    2.39
  12   6   2    1.99    2.22
  12   6   2    2.89    4.11
  12   6   2   -1.90    2.40
  13   6   2    9.02    2.66
  13   6   2    6.21    4.09
  14   6   2   10.08    4.57
  14   6   2   -5.44    2.92
  14   6   2    4.86    2.91
  14  -7  -2    2.33    4.31
  14  -7  -2    7.55    2.93
  13  -7  -2   -3.39    3.88
  13  -7  -2    0.63    2.84
  12  -7  -2    3.80    2.96
  12  -7  -2    4.82    3.59
  12  -7  -2   -1.45    3.68
  11  -7  -2   -0.63    3.49
  11  -7  -2   -1.38    2.89
  11  -7  -2    2.43    3.56
  10  -7  -2    1.18    3.04
  10  -7  -2    0.76    2.98
  10  -7  -2    0.10    3.07
   9  -7  -2    8.04    3.25
   9  -7  -2    5.96    3.27
   9  -7  -2    7.16    3.27
   9  -7  -2    7.12    3.16
  -9   7   2   11.52    3.29
   8  -7  -2   37.70    3.65
   8  -7  -2   31.89    3.73
   8  -7  -2   33.97    3.57
   8  -7  -2   40.46    4.99
  -8   7   2   40.44    3.84
   7  -7  -2   36.64    3.78
   7  -7  -2   36.14    4.47
   7  -7  -2   34.49    3.38
   7  -7  -2   35.41    4.59
  -7   7   2   32.37    3.58
   6  -7  -2   25.40    2.76
   6  -7  -2   29.77    2.93
   6  -7  -2   22.10    2.78
   6  -7  -2   33.38    3.83
  -6   7   2   36.41    3.46
   5  -7  -2    2.68    2.29
   5  -7  -2    6.47    2.16
   5  -7  -2    4.38    1.73
  -5   7   2    6.26    2.47
   4  -7  -2   45.06    3.75
   4  -7  -2   39.87    2.25
   4  -7  -2   36.39    3.08
  -4   7   2   41.98    3.09
   3  -7  -2   10.49    1.23
   3  -7  -2    8.05    2.25
   3  -7  -2    7.15    1.90
  -3   7   2    8.34    2.18
  -3   7   2    7.46    2.47
  -3   7   2    7.79    0.85
   2  -7  -2   -0.01    1.50
   2  -7  -2   -1.19    1.86
  -2   7   2   -0.57    2.12
  -2   7   2   -0.30    0.96
  -2   7   2    3.25    1.98
   1  -7  -2    3.22    1.74
  -1   7   2    6.13    2.07
  -1   7   2    4.72    1.32
  -1   7   2    4.11    1.62
  -1   7   2    4.79    1.85
   0  -7  -2    2.58    1.69
   0   7   2    1.28    1.65
   0   7   2    4.04    1.80
   0   7   2    3.20    1.41
   0   7   2    2.54    1.46
  -1  -7  -2   61.94    2.26
   1   7   2   66.58    3.33
   1   7   2   64.62    2.84
   1   7   2   64.61    1.79
   1   7   2   69.34    3.22
  -2  -7  -2   62.06    2.22
   2   7   2   67.52    3.79
   2   7   2   63.26    2.53
   2   7   2   68.25    2.68
   2   7   2   65.92    2.99
   2   7   2   64.54    2.27
  -3  -7  -2   20.09    1.80
   3   7   2   20.66    2.31
   3   7   2   19.43    2.67
   3   7   2   21.13    2.03
   3   7   2   18.95    2.07
   3   7   2   19.85    1.98
  -4  -7  -2    2.85    1.27
   4   7   2    3.49    0.53
   4   7   2    2.35    1.21
   4   7   2    4.63    2.52
   4   7   2    2.56    0.57
   4   7   2    2.43    1.05
   4   7   2    0.44    1.87
   4   7   2    1.83    1.58
  -5  -7  -2   -1.48    1.11
   5   7   2   -1.12    1.89
   5   7   2    2.30    2.57
   5   7   2    0.73    0.93
   5   7   2   -0.18    1.43
   5   7   2    0.60    1.05
  -6  -7  -2    3.71    1.22
   6   7   2    2.48    1.01
   6   7   2    3.98    2.28
  -7  -7  -2   13.71    1.48
   7   7   2   11.13    1.37
   7   7   2   12.51    2.93
   8   7   2   10.74    1.79
   8   7   2   10.13    1.58
   8   7   2   11.50    3.24
   9   7   2    8.85    3.53
   9   7   2   11.13    2.05
   9   7   2   10.98    1.80
  10   7   2    3.67    2.13
  10   7   2    0.74    1.72
  10   7   2    0.98    3.35
  11   7   2   25.93    4.34
  11   7   2   23.32    2.58
  11   7   2   18.52    2.73
  12   7   2   12.14    4.43
  12   7   2    3.94    2.62
  12   7   2    9.41    2.45
  13   7   2    6.67    4.13
  13   7   2    3.58    2.50
  13   7   2   -2.68    2.67
  14   7   2   -2.14    3.02
  14   7   2    5.96    4.51
  14   7   2    8.77    3.00
  14  -8  -2    6.85    3.05
  14  -8  -2    2.34    4.51
  13  -8  -2    0.08    3.98
  13  -8  -2    5.84    3.10
  12  -8  -2   24.96    4.72
  12  -8  -2   29.30    3.68
  11  -8  -2    4.20    3.18
  11  -8  -2    5.17    3.63
  11  -8  -2    4.86    3.60
  10  -8  -2    0.45    3.39
  10  -8  -2    1.95    3.14
  10  -8  -2    0.11    3.11
   9  -8  -2   19.18    3.65
   9  -8  -2   14.44    3.62
   9  -8  -2   17.67    3.26
  -9   8   2   21.52    3.72
   8  -8  -2    4.36    2.85
   8  -8  -2    2.52    2.85
   8  -8  -2   -0.36    2.56
   8  -8  -2   -1.46    2.73
  -8   8   2    2.55    2.85
   7  -8  -2    8.95    2.81
   7  -8  -2    5.09    2.68
   7  -8  -2    7.09    2.89
   7  -8  -2    5.76    2.39
  -7   8   2   11.01    2.97
   6  -8  -2   16.65    3.06
   6  -8  -2   18.48    2.88
   6  -8  -2   17.31    2.79
   6  -8  -2   18.88    2.33
  -6   8   2   19.03    3.03
   5  -8  -2   39.33    3.84
   5  -8  -2   35.03    3.23
   5  -8  -2   38.71    2.51
  -5   8   2   37.00    3.21
   4  -8  -2   -3.22    2.25
   4  -8  -2    0.36    1.27
   4  -8  -2   -0.30    1.84
  -4   8   2   -1.63    2.15
  -4   8   2   -2.91    2.33
   3  -8  -2  186.17    5.59
   3  -8  -2  185.74    4.81
  -3   8   2  185.29    3.39
  -3   8   2  186.83    5.01
  -3   8   2  187.29    5.71
   2  -8  -2   29.76    3.15
   2  -8  -2   32.35    2.75
  -2   8   2   31.50    2.94
  -2   8   2   33.25    2.16
  -2   8   2   34.77    3.87
   1  -8  -2    3.63    1.83
  -1   8   2    3.27    1.78
  -1   8   2    1.75    2.10
  -1   8   2    2.15    2.13
  -1   8   2    3.88    1.40
   0  -8  -2   -0.91    1.80
   0   8   2    0.96    1.64
   0   8   2    1.13    1.53
   0   8   2    0.33    1.82
   0   8   2   -1.51    1.87
  -1  -8  -2   12.47    1.89
   1   8   2   13.47    1.12
   1   8   2   12.25    1.77
   1   8   2    9.46    2.04
   1   8   2    8.19    1.92
   1   8   2    9.90    2.15
  -2  -8  -2    1.02    1.56
   2   8   2   -1.35    1.90
   2   8   2    1.10    1.24
   2   8   2    1.88    2.11
   2   8   2    0.14    1.67
   2   8   2    0.32    1.35
  -3  -8  -2   18.48    1.73
   3   8   2   17.90    2.74
   3   8   2   18.47    2.28
   3   8   2   17.05    1.86
   3   8   2   16.42    1.86
   3   8   2   20.38    2.24
  -4  -8  -2  142.30    3.23
   4   8   2  139.49    2.52
   4   8   2  143.11    4.09
   4   8   2  146.58    5.74
   4   8   2  141.77    2.56
   4   8   2  148.36    3.69
   4   8   2  140.17    3.51
   4   8   2  143.19    3.83
  -5  -8  -2   26.86    1.90
   5   8   2   27.99    2.40
   5   8   2   26.54    2.70
   5   8   2   28.24    2.21
   5   8   2   29.01    2.15
   5   8   2   25.62    3.35
  -6  -8  -2   41.77    2.01
   6   8   2   37.06    3.25
   6   8   2   42.59    2.39
  -7  -8  -2   62.95    2.41
   7   8   2   69.73    2.87
   7   8   2   64.19    4.11
   8   8   2    1.16    3.23
   8   8   2   -0.43    1.42
   9   8   2   -0.25    1.58
   9   8   2   -0.84    3.15
   9   8   2    1.28    1.95
  10   8   2    5.84    1.92
  10   8   2    5.48    3.71
  10   8   2    5.48    2.27
  11   8   2    5.98    3.65
  11   8   2    0.35    1.96
  11   8   2   -2.15    2.34
  12   8   2    2.83    2.27
  12   8   2   -0.16    3.99
  12   8   2   -3.01    2.54
  13   8   2   10.12    2.78
  13   8   2    3.98    2.85
  13   8   2    6.26    4.09
  14   8   2    4.28    2.94
  14   8   2   -4.04    2.91
  14   8   2    6.91    4.39
  14  -9  -2   -2.66    4.29
  14  -9  -2    4.31    3.20
  13  -9  -2    8.36    3.37
  13  -9  -2    5.57    4.25
  12  -9  -2    2.16    3.27
  12  -9  -2   -1.53    3.84
  11  -9  -2    1.44    3.39
  11  -9  -2    4.58    3.35
  10  -9  -2   11.60    3.54
  10  -9  -2    8.96    3.43
   9  -9  -2   33.66    4.16
   9  -9  -2   46.89    4.73
   9  -9  -2   37.44    4.24
  -9   9   2   38.62    4.40
   8  -9  -2   -2.15    2.72
   8  -9  -2   -0.95    2.46
   8  -9  -2   -1.03    3.44
  -8   9   2   -1.96    3.39
   7  -9  -2    9.08    2.98
   7  -9  -2   14.19    3.26
   7  -9  -2    9.49    2.39
   7  -9  -2   11.14    3.08
  -7   9   2    9.89    3.54
   6  -9  -2   81.20    3.31
   6  -9  -2   80.11    5.07
   6  -9  -2   76.71    4.21
  -6   9   2   79.98    4.19
   5  -9  -2   -1.08    2.45
   5  -9  -2    0.49    2.14
  -5   9   2    1.23    2.60
   4  -9  -2    3.01    2.44
   4  -9  -2    2.29    2.04
  -4   9   2    1.88    2.28
  -4   9   2    7.56    2.74
   3  -9  -2    1.81    1.99
   3  -9  -2    1.90    2.32
  -3   9   2   -2.40    2.50
  -3   9   2    0.37    2.27
   2  -9  -2   22.22    2.67
   2  -9  -2   22.75    2.91
  -2   9   2   18.06    2.75
  -2   9   2   20.79    2.25
  -2   9   2   25.09    3.10
   1  -9  -2    3.50    2.11
  -1   9   2    0.79    1.81
  -1   9   2    2.18    2.16
  -1   9   2    2.74    1.55
  -1   9   2   -2.97    2.31
   0  -9  -2  117.08    3.63
   0   9   2  120.28    4.41
   0   9   2  120.41    4.31
   0   9   2  114.29    4.69
  -1  -9  -2   25.33    2.32
   1   9   2   28.73    2.84
   1   9   2   26.40    2.96
   1   9   2   28.77    3.32
   1   9   2   27.00    1.45
   1   9   2   24.03    2.57
  -2  -9  -2   28.61    2.46
   2   9   2   29.27    3.33
   2   9   2   26.77    2.72
   2   9   2   28.66    1.88
   2   9   2   28.70    2.78
   2   9   2   37.28    3.78
  -3  -9  -2   52.97    2.48
   3   9   2   54.25    2.99
   3   9   2   58.53    3.37
   3   9   2   63.94    4.52
   3   9   2   58.61    2.96
   3   9   2   55.51    2.53
  -4  -9  -2    4.91    1.50
   4   9   2    1.46    1.73
   4   9   2    3.88    1.61
   4   9   2    3.77    1.97
   4   9   2    4.77    1.06
   4   9   2    3.09    2.84
   4   9   2    2.52    1.34
  -5  -9  -2    2.74    1.47
   5   9   2    1.75    1.30
   5   9   2    2.23    1.88
   5   9   2    2.42    2.11
   5   9   2    2.84    1.53
  -6  -9  -2    1.37    1.46
   6   9   2   -0.44    1.31
   6   9   2    2.39    1.92
   6   9   2   -1.63    2.36
  -7  -9  -2   10.09    1.68
   7   9   2    9.43    1.68
   7   9   2   15.66    3.20
   8   9   2    6.66    1.75
   8   9   2    9.22    3.23
   9   9   2   31.60    3.64
   9   9   2   31.36    3.12
   9   9   2   40.22    4.47
  10   9   2    9.01    2.37
  10   9   2   15.08    2.19
  10   9   2   14.99    4.05
  11   9   2    1.61    1.99
  11   9   2   -0.19    3.41
  11   9   2    0.03    2.41
  12   9   2    0.46    2.66
  12   9   2    2.06    3.75
  12   9   2    3.53    2.31
  13   9   2    0.93    2.92
  13   9   2    4.98    4.43
  13   9   2    5.69    2.68
  14   9   2    9.86    4.52
  14   9   2    4.28    2.95
  14   9   2   -4.95    2.92
  14 -10  -2   -0.31    4.30
  14 -10  -2    4.52    3.33
  13 -10  -2   11.90    4.46
  13 -10  -2   14.42    3.75
  12 -10  -2    0.03    3.93
  12 -10  -2    5.50    3.48
  11 -10  -2    1.19    3.51
  11 -10  -2   -1.34    3.43
  10 -10  -2   20.76    4.05
  10 -10  -2   29.72    3.89
   9 -10  -2   17.49    3.81
   9 -10  -2   19.24    3.68
  -9  10   2   23.09    4.13
   8 -10  -2   10.49    3.41
   8 -10  -2    6.31    3.20
  -8  10   2    8.58    3.81
   7 -10  -2   -0.74    3.10
   7 -10  -2    0.22    2.62
  -7  10   2    0.13    3.17
   6 -10  -2   27.01    3.47
   6 -10  -2   22.81    3.22
  -6  10   2   30.71    3.77
   5 -10  -2    1.13    2.22
   5 -10  -2    2.14    2.70
  -5  10   2    3.21    2.88
   4 -10  -2  114.65    4.92
   4 -10  -2  117.15    4.55
  -4  10   2  110.71    5.55
  -4  10   2  111.97    4.56
   3 -10  -2   83.92    4.21
   3 -10  -2   82.07    3.94
  -3  10   2   75.54    4.82
  -3  10   2   82.67    4.02
   2 -10  -2    2.12    2.33
  -2  10   2    2.63    2.46
  -2  10   2    1.83    2.58
   1 -10  -2   49.54    3.16
  -1  10   2   50.71    3.79
  -1  10   2   48.72    3.23
  -1  10   2   50.41    3.76
  -1  10   2   50.89    4.04
   0 -10  -2   51.82    2.99
   0  10   2   51.18    3.35
   0  10   2   47.18    3.59
   0  10   2   45.61    3.62
   0  10   2   50.00    4.18
  -1 -10  -2    7.24    1.99
   1  10   2    8.59    1.94
   1  10   2    9.72    1.03
   1  10   2    7.74    2.35
   1  10   2    3.67    2.08
   1  10   2    4.82    2.49
  -2 -10  -2    9.66    1.88
   2  10   2   10.72    1.85
   2  10   2   13.47    1.47
   2  10   2    8.09    2.10
   2  10   2   10.92    2.50
   2  10   2   15.21    2.74
  -3 -10  -2   18.61    2.05
   3  10   2   14.28    2.17
   3  10   2   16.81    3.05
   3  10   2   18.01    1.87
   3  10   2   13.38    1.86
   3  10   2   16.37    2.55
  -4 -10  -2   18.96    1.98
   4  10   2   16.67    2.13
   4  10   2   17.24    2.16
   4  10   2   19.44    2.51
   4  10   2   15.53    1.93
  -5 -10  -2   20.84    1.98
   5  10   2   18.55    1.07
   5  10   2   16.11    1.91
   5  10   2   17.81    2.41
   5  10   2   16.32    1.09
   5  10   2   16.89    2.46
  -6 -10  -2   53.70    2.57
   6  10   2   51.19    3.49
   6  10   2   54.73    3.07
   6  10   2   54.58    3.15
  -7 -10  -2   19.59    2.11
   7  10   2   14.88    1.96
   7  10   2   18.34    3.12
   8  10   2   -1.50    2.92
   8  10   2    0.88    1.67
   9  10   2    9.12    2.31
   9  10   2    9.28    1.99
   9  10   2   17.43    3.85
  10  10   2    1.91    1.91
  10  10   2    4.94    3.40
  10  10   2   -0.98    2.26
  11  10   2   -0.96    3.72
  11  10   2    0.50    2.03
  11  10   2   -2.58    2.43
  12  10   2    4.31    2.38
  12  10   2    3.16    3.79
  12  10   2   -2.87    2.67
  13  10   2    5.59    4.13
  13  10   2    5.28    2.70
  13  10   2   -0.23    3.05
  14  10   2    6.03    3.08
  14  10   2   -4.69    3.03
  14 -11  -2    2.51    3.68
  13 -11  -2    2.21    3.56
  13 -11  -2   -3.59    4.11
  12 -11  -2    0.78    3.91
  12 -11  -2    1.56    3.52
  11 -11  -2    2.38    3.73
  11 -11  -2    9.61    3.92
  10 -11  -2    9.64    3.91
  10 -11  -2   13.17    3.71
   9 -11  -2    3.34    3.25
   9 -11  -2    8.28    3.54
  -9  11   2    5.53    3.41
   8 -11  -2   42.74    5.28
   8 -11  -2   47.92    4.67
  -8  11   2   49.28    4.54
   7 -11  -2   39.49    4.50
   7 -11  -2   24.93    3.74
  -7  11   2   40.40    4.87
   6 -11  -2   -0.51    2.43
   6 -11  -2   -3.36    3.00
  -6  11   2   -0.35    3.28
   5 -11  -2   23.88    3.43
   5 -11  -2   12.79    2.75
  -5  11   2   17.07    3.51
   4 -11  -2    0.67    2.15
   4 -11  -2    1.63    2.77
  -4  11   2   -2.65    2.49
  -4  11   2   -1.22    2.90
   3 -11  -2    2.49    2.11
   3 -11  -2    0.25    2.58
  -3  11   2    1.01    2.56
  -3  11   2    0.70    2.83
   2 -11  -2    6.59    2.49
  -2  11   2    9.34    2.72
  -2  11   2    7.99    2.86
   1 -11  -2    8.95    2.37
  -1  11   2    8.36    2.57
  -1  11   2   12.65    3.22
  -1  11   2   11.61    2.31
   0 -11  -2   12.43    2.30
   0  11   2   11.22    2.62
   0  11   2    8.92    2.14
   0  11   2   10.29    2.07
   0  11   2    7.80    2.93
  -1 -11  -2   26.05    2.66
   1  11   2   20.22    2.54
   1  11   2   22.93    2.79
   1  11   2   24.75    3.14
   1  11   2   25.66    2.92
  -2 -11  -2  109.76    3.76
   2  11   2  112.15    5.03
   2  11   2  120.06    4.51
   2  11   2  111.55    2.90
   2  11   2  112.20    3.90
   2  11   2  114.35    4.82
  -3 -11  -2   13.97    2.13
   3  11   2   12.84    1.77
   3  11   2   16.44    2.64
   3  11   2   11.98    2.29
   3  11   2   10.36    1.96
  -4 -11  -2    8.09    1.97
   4  11   2    5.81    1.90
   4  11   2    4.01    2.37
   4  11   2    4.11    2.03
   4  11   2    3.29    1.66
  -5 -11  -2    6.09    1.88
   5  11   2    5.13    0.98
   5  11   2    4.38    2.39
   5  11   2    3.47    1.08
   5  11   2    4.05    2.13
   5  11   2    4.54    1.77
  -6 -11  -2    2.56    1.84
   6  11   2    1.94    1.75
   6  11   2    3.10    2.61
   6  11   2    4.37    2.41
   7  11   2    1.44    1.74
   7  11   2    0.51    2.96
   8  11   2    9.66    2.03
   8  11   2    7.89    3.36
   9  11   2   10.09    2.50
   9  11   2   12.39    2.15
   9  11   2   11.18    3.45
  10  11   2    4.42    3.57
  10  11   2    2.49    2.01
  10  11   2    0.19    2.45
  11  11   2    3.72    2.72
  11  11   2    6.37    2.28
  11  11   2    9.11    3.70
  12  11   2   14.95    2.75
  12  11   2   15.05    4.55
  12  11   2    7.66    2.98
  13  11   2    3.81    4.10
  13  11   2    5.60    2.73
  13 -12  -2    5.67    3.86
  12 -12  -2   17.16    3.82
  11 -12  -2    7.87    3.98
  11 -12  -2    5.50    3.85
  10 -12  -2    5.43    3.65
  10 -12  -2    2.10    3.59
   9 -12  -2    0.21    3.48
   9 -12  -2    2.31    3.26
  -9  12   2    5.75    3.64
   8 -12  -2   -1.49    2.89
   8 -12  -2   -1.12    3.46
  -8  12   2    1.74    3.46
   7 -12  -2    1.46    3.53
   7 -12  -2    2.24    2.97
  -7  12   2    1.42    3.62
   6 -12  -2    0.52    3.29
   6 -12  -2    0.84    2.69
  -6  12   2    1.35    3.55
   5 -12  -2   22.00    3.72
   5 -12  -2   19.60    3.07
  -5  12   2   22.81    3.91
   4 -12  -2   70.12    4.54
   4 -12  -2   64.97    4.37
  -4  12   2   66.91    4.48
  -4  12   2   58.07    5.05
   3 -12  -2   13.54    3.02
   3 -12  -2    8.83    2.39
  -3  12   2    2.10    2.95
  -3  12   2   11.71    3.36
   2 -12  -2   40.49    3.45
  -2  12   2   33.44    3.65
  -2  12   2   35.34    4.46
   1 -12  -2   16.00    2.69
  -1  12   2   13.67    2.57
  -1  12   2   13.21    2.88
  -1  12   2   15.00    3.47
   0 -12  -2   33.22    3.10
   0  12   2   38.73    3.86
   0  12   2   35.75    3.69
   0  12   2   34.06    4.35
  -1 -12  -2   -2.05    1.95
   1  12   2    1.13    1.89
   1  12   2   -0.27    2.52
   1  12   2    0.06    2.31
  -2 -12  -2    3.92    2.16
   2  12   2    3.47    1.89
   2  12   2    0.51    2.72
   2  12   2    2.69    2.35
   2  12   2    2.61    1.23
  -3 -12  -2   48.97    3.07
   3  12   2   46.06    3.49
   3  12   2   48.77    2.53
   3  12   2   47.67    4.18
   3  12   2   47.12    3.68
  -4 -12  -2   26.07    2.51
   4  12   2   21.70    3.07
   4  12   2   21.74    2.33
   4  12   2   25.78    3.24
  -5 -12  -2    6.97    2.07
   5  12   2    8.61    1.37
   5  12   2    6.52    2.32
   5  12   2    6.19    1.97
   5  12   2    6.86    2.70
  -6 -12  -2   -0.08    1.98
   6  12   2    4.18    2.66
   6  12   2    1.21    2.57
   6  12   2    0.03    1.83
   7  12   2   12.48    2.26
   7  12   2   13.95    3.14
   7  12   2   16.26    2.74
   8  12   2   22.50    3.68
   8  12   2   18.05    2.37
   9  12   2   -0.27    2.41
   9  12   2   -0.99    3.32
   9  12   2   -0.16    1.92
  10  12   2    1.94    2.62
  10  12   2    6.92    3.37
  10  12   2    3.86    2.09
  11  12   2    0.15    3.68
  11  12   2    2.12    2.16
  11  12   2   -3.12    2.57
  12  12   2   -0.10    2.40
  12  12   2    6.28    3.88
  12  12   2   -5.87    2.80
  13  12   2   -2.72    3.18
  13  12   2    5.28    2.84
  13  12   2    9.55    4.72
  13 -13  -2    5.50    4.18
  12 -13  -2    3.59    4.07
  11 -13  -2    1.89    3.92
  10 -13  -2    1.92    3.67
   9 -13  -2    8.24    5.98
   9 -13  -2   12.00    3.97
  -9  13   2   15.59    4.06
   8 -13  -2   12.29    3.91
   8 -13  -2    8.63    3.42
  -8  13   2   19.49    4.61
   7 -13  -2    2.53    3.04
   7 -13  -2    5.14    3.71
  -7  13   2    4.89    3.73
   6 -13  -2   14.78    3.31
   6 -13  -2   12.00    3.86
  -6  13   2   12.87    4.08
   5 -13  -2   15.04    3.06
   5 -13  -2   16.00    3.70
  -5  13   2   14.57    3.97
   4 -13  -2    4.78    3.22
   4 -13  -2    5.45    2.48
  -4  13   2    4.63    3.46
   3 -13  -2   10.66    2.94
   3 -13  -2    7.33    3.07
  -3  13   2   13.33    3.54
  -3  13   2    3.58    3.06
   2 -13  -2    6.23    2.91
  -2  13   2    3.65    2.90
  -2  13   2    3.68    3.31
   1 -13  -2    4.97    2.68
  -1  13   2    5.16    3.19
  -1  13   2    6.19    2.64
  -1  13   2    2.71    2.75
   0 -13  -2   31.49    3.13
   0  13   2   32.82    3.70
   0  13   2   28.55    3.82
   0  13   2   28.75    3.47
  -1 -13  -2   80.01    4.06
   1  13   2   73.20    4.82
   1  13   2   72.43    4.46
   1  13   2   78.06    4.43
  -2 -13  -2    0.98    2.34
   2  13   2    1.92    2.67
   2  13   2    1.73    2.01
   2  13   2    3.42    2.52
   2  13   2    2.50    1.22
  -3 -13  -2   33.13    2.86
   3  13   2   28.53    2.32
   3  13   2   33.19    3.71
   3  13   2   36.75    4.42
   3  13   2   36.69    3.72
  -4 -13  -2   23.43    2.62
   4  13   2   24.41    3.33
   4  13   2   26.28    3.54
   4  13   2   22.63    2.38
  -5 -13  -2    0.22    2.11
   5  13   2    0.02    2.86
   5  13   2    1.69    2.24
   5  13   2    0.02    1.36
   5  13   2    0.76    1.99
  -6 -13  -2    1.06    2.16
   6  13   2   -0.47    0.75
   6  13   2   -0.87    1.99
   6  13   2    1.09    2.71
   6  13   2   -0.42    2.51
   7  13   2    1.01    2.66
   7  13   2    1.18    1.95
   7  13   2    3.51    2.69
   8  13   2    4.93    2.12
   8  13   2    6.23    3.06
   9  13   2    7.27    3.38
   9  13   2    2.96    2.66
   9  13   2    3.20    2.13
  10  13   2   17.03    4.07
  10  13   2   14.95    3.08
  10  13   2   16.00    2.62
  11  13   2   10.79    3.83
  11  13   2    9.83    2.58
  11  13   2    3.40    2.89
  12  13   2   -1.83    3.07
  12  13   2    3.12    4.21
  12  13   2    2.61    2.57
  13  13   2    2.49    4.03
  13  13   2    2.20    2.88
  13  13   2   -5.82    3.09
  13 -14  -2   11.26    4.46
  12 -14  -2   10.68    4.58
  11 -14  -2    1.08    3.69
  10 -14  -2    6.58    3.93
   9 -14  -2    2.36    4.22
  -9  14   2    2.92    3.76
   8 -14  -2   -3.16    3.71
  -8  14   2    7.76    3.96
   7 -14  -2    2.91    3.65
  -7  14   2    3.98    3.94
   6 -14  -2   55.85    5.07
  -6  14   2   56.29    5.16
   5 -14  -2   -6.04    3.57
  -5  14   2   -3.60    3.73
   4 -14  -2   16.36    3.92
  -4  14   2   16.77    4.27
   3 -14  -2   26.60    3.88
  -3  14   2   36.30    4.50
   2 -14  -2    4.91    3.06
  -2  14   2    2.09    3.55
  -2  14   2    1.80    3.22
   1 -14  -2    4.84    2.93
  -1  14   2    1.79    3.35
  -1  14   2    0.56    2.97
   0 -14  -2   -1.36    2.48
   0  14   2    3.14    2.30
   0  14   2    0.12    2.87
   0  14   2   -0.26    3.17
  -1 -14  -2   -0.67    2.43
   1  14   2    1.30    3.31
   1  14   2    1.32    2.70
   1  14   2   -0.19    2.18
  -2 -14  -2    2.33    2.33
   2  14   2    2.79    2.67
   2  14   2    3.30    3.31
   2  14   2    0.59    2.14
  -3 -14  -2   44.75    3.30
   3  14   2   46.24    2.58
   3  14   2   50.56    4.24
   3  14   2   46.54    4.31
  -4 -14  -2   45.08    3.43
   4  14   2   45.99    4.32
   4  14   2   39.89    3.97
   4  14   2   38.29    3.01
  -5 -14  -2    4.64    2.36
   5  14   2    7.27    3.10
   5  14   2    5.68    1.67
   5  14   2    4.39    2.29
   5  14   2    4.80    2.25
  -6 -14  -2   16.26    2.53
   6  14   2   14.79    2.91
   6  14   2   14.95    3.19
   6  14   2   14.69    1.42
   6  14   2   12.94    2.49
   7  14   2   19.44    3.17
   7  14   2   16.86    2.66
   7  14   2   22.02    3.30
   8  14   2    1.18    2.78
   8  14   2    0.90    2.14
   9  14   2   -1.56    2.08
   9  14   2    0.81    3.05
   9  14   2   -0.61    2.76
  10  14   2    0.21    3.51
  10  14   2    1.96    2.32
  10  14   2   -0.41    2.84
  11  14   2    3.39    2.47
  11  14   2   -2.13    3.59
  11  14   2   -1.08    2.92
  12  14   2   -3.62    3.18
  12  14   2    3.03    3.85
  12  14   2    5.34    2.73
  12 -15  -2    8.32    4.62
  11 -15  -2    8.35    4.19
  10 -15  -2   12.30    4.21
   9 -15  -2    1.72    4.29
  -9  15   2    7.79    4.70
   8 -15  -2    4.99    4.09
  -8  15   2    8.68    4.13
   7 -15  -2   24.39    4.55
  -7  15   2   30.32    4.80
   6 -15  -2   -0.20    3.84
  -6  15   2    5.74    4.12
   5 -15  -2    2.84    3.78
  -5  15   2    3.23    4.05
   4 -15  -2   -2.94    3.46
  -4  15   2    2.32    3.94
   3 -15  -2   19.64    3.93
  -3  15   2   19.25    4.42
   2 -15  -2    0.05    3.58
  -2  15   2   -1.94    3.53
   1 -15  -2   22.15    3.52
  -1  15   2   25.86    4.26
   0 -15  -2   26.99    3.41
   0  15   2   31.57    4.67
   0  15   2   22.15    3.19
  -1 -15  -2    3.44    3.04
   1  15   2    2.64    3.33
   1  15   2    3.47    2.55
  -2 -15  -2   13.91    3.12
   2  15   2    9.12    2.64
   2  15   2    5.28    3.28
  -3 -15  -2   25.60    3.23
   3  15   2   20.94    3.13
   3  15   2   20.67    3.98
   3  15   2   21.79    2.07
  -4 -15  -2    8.68    2.72
   4  15   2    0.77    3.21
   4  15   2    6.67    2.06
   4  15   2    3.46    2.44
  -5 -15  -2    0.59    2.41
   5  15   2    1.98    2.36
   5  15   2    1.54    3.09
   5  15   2   -0.40    2.19
   6  15   2   -1.08    1.20
   6  15   2   -1.03    3.01
   6  15   2    2.57    2.45
   6  15   2   -0.17    2.17
   7  15   2   -0.28    2.18
   7  15   2   -4.80    2.76
   7  15   2    3.71    2.77
   8  15   2    8.97    3.14
   8  15   2    8.22    2.62
   9  15   2   15.06    3.59
   9  15   2   11.33    2.70
   9  15   2    9.87    3.18
  10  15   2    2.78    3.04
  10  15   2    4.51    2.47
  10  15   2    7.41    3.63
  11  15   2    3.82    3.31
  11  15   2    4.27    2.69
  11  15   2    6.43    4.01
  12  15   2    5.77    2.97
  12  15   2    3.70    3.33
  12  15   2    3.97    3.79
  12 -16  -2   10.32    4.83
  11 -16  -2   12.37    4.51
  10 -16  -2    2.61    4.58
   9 -16  -2    3.12    4.05
  -9  16   2   10.29    5.42
   8 -16  -2    3.53    4.52
  -8  16   2   -1.33    4.41
   7 -16  -2   -2.87    4.36
  -7  16   2    6.25    4.69
   6 -16  -2    2.44    3.90
  -6  16   2    0.65    4.03
   5 -16  -2   13.27    4.18
  -5  16   2   16.74    4.47
   4 -16  -2   39.54    4.73
  -4  16   2   42.30    5.10
   3 -16  -2   -2.00    3.53
  -3  16   2    2.70    4.42
   2 -16  -2   29.46    4.18
  -2  16   2   30.80    4.71
   1 -16  -2    1.17    3.23
  -1  16   2    0.31    4.20
   0 -16  -2    5.49    3.14
   0  16   2    2.28    3.71
  -1 -16  -2    1.07    2.92
   1  16   2   -1.72    3.95
   1  16   2    0.54    2.52
  -2 -16  -2   14.07    3.10
   2  16   2   12.75    4.00
   2  16   2   10.25    2.85
  -3 -16  -2    5.93    3.05
   3  16   2    6.63    3.71
   3  16   2    6.74    2.71
  -4 -16  -2    1.48    2.70
   4  16   2    2.42    1.92
   4  16   2    3.80    3.32
   4  16   2    3.45    2.56
  -5 -16  -2   25.50    3.11
   5  16   2   21.64    3.10
   5  16   2   24.90    3.78
   5  16   2   26.79    2.82
   6  16   2    1.58    2.39
   6  16   2   -0.89    1.34
   6  16   2    0.87    2.38
   6  16   2   -2.03    3.15
   7  16   2    8.66    2.90
   7  16   2    3.08    3.18
   7  16   2    4.97    2.53
   8  16   2   13.19    3.36
   8  16   2    7.89    2.63
   9  16   2    5.35    3.31
   9  16   2    3.35    3.15
   9  16   2    4.79    2.60
  10  16   2    2.23    3.49
  10  16   2    2.07    2.56
  10  16   2   -1.57    3.14
  11  16   2    4.67    2.81
  11  16   2    9.07    4.12
  11  16   2    1.79    3.47
  11 -17  -2    8.48    4.61
  10 -17  -2   -1.00    4.76
   9 -17  -2   28.98    5.04
   8 -17  -2    8.89    4.35
  -8  17   2   13.26    4.65
   7 -17  -2    4.71    4.21
  -7  17   2    7.60    4.51
   6 -17  -2   14.20    4.43
  -6  17   2   16.58    4.85
   5 -17  -2   -1.94    3.80
  -5  17   2    3.51    4.27
   4 -17  -2   -5.34    3.49
  -4  17   2    0.24    4.03
   3 -17  -2    5.46    3.81
  -3  17   2    3.19    4.09
   2 -17  -2   22.12    3.97
  -2  17   2   17.67    4.49
   1 -17  -2   -0.67    3.29
  -1  17   2   -1.12    3.84
   0 -17  -2   -1.77    3.41
   0  17   2    1.64    4.18
  -1 -17  -2   36.65    4.17
   1  17   2   35.51    4.56
  -2 -17  -2   24.35    3.48
   2  17   2   26.32    3.84
   2  17   2   26.77    4.67
  -3 -17  -2    2.40    3.02
   3  17   2    4.50    3.31
   3  17   2   -0.18    2.52
  -4 -17  -2   39.11    3.71
   4  17   2   29.08    4.21
   4  17   2   34.30    4.73
  -5 -17  -2    2.27    2.72
   5  17   2    4.66    2.21
   5  17   2    3.25    2.59
   5  17   2    3.17    3.39
   6  17   2   -0.68    2.45
   6  17   2   -1.64    3.22
   6  17   2    0.42    1.52
   6  17   2    2.02    2.36
   7  17   2   17.41    3.07
   7  17   2   14.51    3.69
   7  17   2   21.66    3.31
   8  17   2   14.14    3.00
   8  17   2   11.36    3.32
   9  17   2    2.42    2.59
   9  17   2    0.14    3.20
   9  17   2    1.37    3.33
  10  17   2    5.06    3.49
  10  17   2   13.19    3.93
  10  17   2    9.51    2.98
  11  17   2    2.84    3.67
  11  17   2    8.15    3.12
  11 -18  -2    6.64    4.61
  10 -18  -2    4.05    5.13
   9 -18  -2   -0.81    4.31
   8 -18  -2   -0.84    4.29
  -8  18   2    4.05    4.40
   7 -18  -2    3.55    4.28
  -7  18   2    5.73    4.37
   6 -18  -2   20.86    5.09
  -6  18   2   19.39    5.45
   5 -18  -2    9.64    4.22
  -5  18   2   10.90    4.55
   4 -18  -2   16.90    4.27
  -4  18   2   17.57    4.64
   3 -18  -2   36.66    4.56
  -3  18   2   35.40    5.09
   2 -18  -2   -0.26    3.48
  -2  18   2    0.76    4.35
   1 -18  -2    1.93    3.28
  -1  18   2    0.79    4.31
   0 -18  -2    0.64    3.19
   0  18   2    2.33    3.94
  -1 -18  -2    3.26    3.13
   1  18   2    6.41    3.73
  -2 -18  -2    5.50    3.35
   2  18   2    1.54    3.58
  -3 -18  -2   11.21    3.07
   3  18   2   10.62    3.76
  -4 -18  -2   27.59    3.67
   4  18   2   24.55    4.48
   4  18   2   20.65    3.83
  -5 -18  -2    4.67    3.25
   5  18   2    1.55    2.66
   5  18   2   -1.53    3.53
   6  18   2   13.51    1.90
   6  18   2   18.66    3.93
   6  18   2   13.63    3.15
   7  18   2    7.68    3.69
   7  18   2    9.71    3.01
   7  18   2    9.05    2.87
   8  18   2    2.98    2.77
   8  18   2    1.81    2.96
   9  18   2   -3.87    3.40
   9  18   2    5.37    2.83
  10  18   2   -2.42    3.49
  10  18   2   -0.25    2.70
  10 -19  -2   11.35    4.90
   9 -19  -2   11.76    5.23
   8 -19  -2    0.15    4.36
  -8  19   2   -0.90    4.28
   7 -19  -2    7.29    5.02
  -7  19   2   13.62    5.37
   6 -19  -2    6.26    4.37
  -6  19   2    2.25    4.51
   5 -19  -2   -4.48    3.90
  -5  19   2    8.95    4.59
   4 -19  -2    1.23    3.89
  -4  19   2    1.95    4.39
   3 -19  -2    4.39    3.93
  -3  19   2    3.89    4.35
   2 -19  -2    8.70    3.77
  -2  19   2    7.00    4.37
   1 -19  -2   61.02    5.12
  -1  19   2   52.94    5.30
   0 -19  -2    3.70    3.82
   0  19   2    9.82    4.64
  -1 -19  -2    5.11    3.73
   1  19   2    2.21    4.34
  -2 -19  -2   12.77    3.37
   2  19   2   16.73    4.45
  -3 -19  -2    7.14    3.10
   3  19   2    9.24    4.26
  -4 -19  -2   -2.68    3.08
   4  19   2   -0.97    3.46
   5  19   2    0.95    3.82
   6  19   2    1.50    1.75
   6  19   2   -1.11    3.56
   7  19   2    4.90    3.77
   9  19   2    3.19    3.85
  10  19   2   -0.89    3.78
   9 -20  -2    0.87    5.36
   8 -20  -2    2.67    5.12
  -8  20   2    8.49    5.23
   7 -20  -2    9.58    4.78
  -7  20   2    4.85    4.81
   6 -20  -2   -2.54    4.28
  -6  20   2    0.97    4.39
   5 -20  -2   24.29    4.86
  -5  20   2   17.45    5.08
   4 -20  -2   29.19    4.85
  -4  20   2   37.56    5.49
   3 -20  -2   12.06    4.06
  -3  20   2   12.99    4.78
   2 -20  -2    6.25    3.90
  -2  20   2    6.37    4.92
   1 -20  -2    9.01    4.14
  -1  20   2    5.45    4.75
   0 -20  -2    3.53    3.61
   0  20   2    4.38    4.23
  -1 -20  -2    8.93    3.54
   1  20   2    6.20    4.34
  -2 -20  -2    8.19    3.40
   2  20   2   11.03    4.75
  -3 -20  -2    9.87    3.20
   3  20   2   11.66    4.55
  -4 -20  -2    5.29    3.37
   4  20   2    3.14    3.72
   5  20   2    9.98    4.15
   6  20   2   15.96    4.45
   7  20   2    4.81    3.77
   9  20   2   -3.48    3.87
   9 -21  -2   -4.38    4.86
   8 -21  -2   15.27    5.36
  -8  21   2   23.11    5.75
   7 -21  -2    3.12    4.84
  -7  21   2    7.35    4.89
   6 -21  -2   -1.31    4.35
  -6  21   2    8.33    4.84
   5 -21  -2    0.73    4.77
  -5  21   2    5.38    5.19
   4 -21  -2    5.19    4.12
  -4  21   2    0.84    4.48
   3 -21  -2   -3.62    3.86
  -3  21   2    4.52    4.61
   2 -21  -2    5.98    4.03
  -2  21   2    0.71    4.44
   1 -21  -2   11.21    4.18
  -1  21   2   15.34    4.83
   0 -21  -2    5.25    3.62
   0  21   2    7.96    4.92
  -1 -21  -2   21.43    3.99
   1  21   2   28.15    5.54
  -2 -21  -2   10.76    3.94
   2  21   2   10.52    4.36
  -3 -21  -2    4.25    3.62
   3  21   2    4.53    4.53
  -4 -21  -2    3.57    3.50
   4  21   2    5.38    4.33
   5  21   2   -3.20    3.90
   6  21   2    2.74    4.18
   7  21   2    8.46    4.20
   8 -22  -2   -0.68    5.09
  -8  22   2    5.54    5.21
   7 -22  -2    6.06    5.67
  -7  22   2    0.44    5.48
   6 -22  -2    8.54    5.07
  -6  22   2    5.11    5.00
   5 -22  -2   19.71    5.19
  -5  22   2   12.57    5.24
   4 -22  -2    0.29    4.41
  -4  22   2    4.38    4.86
   3 -22  -2    6.79    4.87
  -3  22   2    8.09    4.87
   2 -22  -2   16.50    4.49
  -2  22   2   18.96    5.67
   1 -22  -2    1.36    3.96
  -1  22   2   -3.93    4.85
   0 -22  -2   -1.31    3.61
   0  22   2   -0.91    4.37
  -1 -22  -2    2.59    4.07
   1  22   2    2.17    4.44
  -2 -22  -2    0.23    3.35
   2  22   2   -1.37    4.05
  -3 -22  -2    7.40    3.88
   3  22   2    3.51    4.02
   4  22   2   21.99    4.97
   5  22   2    1.76    4.53
   6  22   2    0.96    4.22
   7  22   2    6.07    4.53
   7 -23  -2    2.37    5.24
  -7  23   2    3.10    5.36
   6 -23  -2    2.28    5.62
  -6  23   2   -6.16    5.63
   5 -23  -2    0.05    4.69
  -5  23   2    7.60    5.87
   4 -23  -2    5.42    5.12
  -4  23   2    2.83    5.50
   3 -23  -2   -3.63    4.36
  -3  23   2   10.27    5.26
   2 -23  -2    3.88    4.21
  -2  23   2    4.60    4.80
   1 -23  -2    4.18    4.10
  -1  23   2    0.99    4.71
   0 -23  -2   11.67    4.19
   0  23   2   12.21    5.49
  -1 -23  -2    3.27    3.88
   1  23   2    3.70    4.93
  -2 -23  -2    0.67    3.56
   2  23   2   -3.15    4.94
  -3 -23  -2    4.08    3.56
   3  23   2   -4.99    4.74
   4  23   2   -0.21    4.70
   5  23   2    4.36    4.52
   6  23   2   -1.18    4.26
   5 -24  -2    1.94    4.89
  -5  24   2   -1.26    5.28
   4 -24  -2   16.29    5.25
  -4  24   2   16.41    5.85
   3 -24  -2    5.85    5.19
  -3  24   2   15.50    6.17
   2 -24  -2   -0.45    4.41
  -2  24   2    1.23    4.86
   1 -24  -2    5.94    4.39
  -1  24   2    5.83    5.66
   0 -24  -2    5.11    4.61
   0  24   2   -1.88    4.80
  -1 -24  -2   -1.77    4.27
   1  24   2    8.37    5.32
  -2 -24  -2    5.88    4.33
   2  24   2    8.32    4.83
  -3 -24  -2   20.23    4.26
   3  24   2   20.82    5.64
   4  24   2   -3.51    4.85
   5  24   2    1.97    4.67
   4 -25  -2    4.51    5.54
  -4  25   2    7.61    6.30
   3 -25  -2    9.49    5.02
  -3  25   2    1.04    5.31
   2 -25  -2    7.21    4.60
  -2  25   2   11.37    5.49
   1 -25  -2   13.98    4.72
  -1  25   2   12.77    5.54
   0 -25  -2    4.18    4.43
   0  25   2    1.83    5.46
  -1 -25  -2    5.88    4.21
   1  25   2    1.83    5.02
  -2 -25  -2    3.64    4.12
   2  25   2   10.68    5.05
   3  25   2    0.04    5.23
  -2 -26   3    0.66    4.90
   1  26  -3   -4.74    5.67
  -1 -26   3   -2.55    4.91
   0  26  -3   13.66    5.82
   0 -26   3    8.69    4.83
  -1  26  -3    5.64    6.11
   1 -26   3    3.13    4.81
   2 -26   3   -2.63    4.76
   4  25  -3    9.45    5.21
  -4 -25   3    0.39    4.60
   3  25  -3   12.29    5.28
  -3 -25   3    9.94    4.49
   2  25  -3   -4.44    5.47
  -2 -25   3    6.30    4.84
   1  25  -3   -0.62    5.58
  -1 -25   3    0.15    4.81
   0  25  -3    4.98    5.21
   0 -25   3    0.07    4.38
  -1  25  -3    7.38    5.80
   1 -25   3   -0.76    4.41
  -2  25  -3    4.29    5.20
   2 -25   3    4.55    4.82
  -3  25  -3    6.36    6.11
   3 -25   3   13.03    5.04
  -4  25  -3    5.52    5.53
   4 -25   3    6.57    5.05
   6  24  -3   -0.69    2.92
   6  24  -3   -7.28    5.01
   5  24  -3   -3.49    4.94
   5  24  -3    1.33    3.07
   5  24  -3   -0.63    5.14
   4  24  -3   -3.15    4.97
   4  24  -3   -0.67    5.06
  -4 -24   3   -3.72    3.79
   3  24  -3    5.06    5.24
  -3 -24   3   -0.90    3.99
   2  24  -3   10.56    5.14
  -2 -24   3   14.25    4.87
   1  24  -3   11.02    5.59
  -1 -24   3    0.80    4.65
   0  24  -3    5.02    5.00
   0 -24   3    3.82    4.22
  -1  24  -3    7.39    5.64
   1 -24   3    1.17    4.31
  -2  24  -3   10.32    5.24
   2 -24   3    8.38    4.74
  -3  24  -3    1.57    5.70
   3 -24   3    1.85    4.52
  -4  24  -3    3.96    5.30
   4 -24   3    4.60    4.85
  -5  24  -3    5.10    5.89
   5 -24   3   -6.22    5.28
  -6  24  -3    6.56    6.00
   6 -24   3    6.98    5.81
   7  23  -3   -4.27    4.68
   6  23  -3    7.30    3.01
   6  23  -3   -1.07    4.72
   5  23  -3   20.89    5.01
   5  23  -3   16.92    5.52
   4  23  -3    1.52    4.88
   4  23  -3    8.10    5.30
  -4 -23   3    2.81    4.17
   3  23  -3    8.72    5.38
  -3 -23   3    4.11    3.91
   2  23  -3    4.45    4.76
  -2 -23   3   10.04    4.04
   1  23  -3   -5.13    4.39
  -1 -23   3    0.76    4.37
   0  23  -3    3.39    4.62
   0 -23   3   -1.93    3.85
  -1  23  -3    2.22    5.19
   1 -23   3    6.59    4.21
  -2  23  -3    2.84    4.80
   2 -23   3    8.24    4.42
  -3  23  -3    1.84    4.61
   3 -23   3    2.45    4.45
  -4  23  -3   18.45    5.41
   4 -23   3   21.99    5.10
  -5  23  -3    9.12    5.76
   5 -23   3   11.58    5.60
  -6  23  -3    4.00    5.59
   6 -23   3    0.79    5.50
  -7  23  -3   11.15    5.44
   7 -23   3   13.36    5.39
   8  22  -3    1.15    4.75
   7  22  -3   -0.30    4.83
   7  22  -3   -0.27    3.44
   6  22  -3    0.49    4.76
   6  22  -3    6.15    2.84
   5  22  -3    3.10    4.87
   5  22  -3   -4.44    4.39
  -5 -22   3   -1.46    3.31
   4  22  -3    3.22    4.27
  -4 -22   3   -1.52    3.88
   3  22  -3    3.32    4.34
  -3 -22   3    7.59    4.21
   2  22  -3    2.39    4.38
  -2 -22   3    4.24    3.83
   1  22  -3   -4.54    4.38
  -1 -22   3    5.29    3.93
   0  22  -3   29.89    5.38
   0 -22   3   26.68    4.57
  -1  22  -3   20.38    5.67
   1 -22   3   23.21    4.64
  -2  22  -3    0.31    4.51
   2 -22   3    4.75    4.19
  -3  22  -3    1.49    4.43
   3 -22   3    0.43    4.28
  -4  22  -3    4.47    4.87
   4 -22   3    4.63    4.37
  -5  22  -3    4.16    5.43
   5 -22   3    2.54    5.04
  -6  22  -3   -0.36    5.27
   6 -22   3   -4.57    5.14
  -7  22  -3    4.95    5.13
   7 -22   3    8.12    5.01
   8 -22   3    3.52    5.59
   9  21  -3   -6.99    4.33
   9  21  -3    5.28    5.86
   8  21  -3   -5.57    4.46
   7  21  -3    5.14    4.57
   7  21  -3    6.73    2.43
   6  21  -3    8.32    2.76
   6  21  -3    7.21    4.50
   5  21  -3    1.94    4.04
   5  21  -3   -0.98    4.20
  -5 -21   3   -0.01    3.60
   4  21  -3   18.22    5.09
  -4 -21   3   13.76    3.86
   3  21  -3   17.85    4.75
  -3 -21   3   22.48    4.15
   2  21  -3   -1.54    4.79
  -2 -21   3   -1.96    3.48
   1  21  -3   -2.61    4.17
  -1 -21   3   -0.49    3.56
   0  21  -3    1.07    4.33
   0 -21   3    6.11    3.87
  -1  21  -3    0.91    4.81
   1 -21   3    3.40    3.87
  -2  21  -3   14.80    4.79
   2 -21   3   13.05    4.34
  -3  21  -3   29.51    5.30
   3 -21   3   26.56    4.85
  -4  21  -3    4.84    4.74
   4 -21   3   11.18    4.48
  -5  21  -3    5.39    5.26
   5 -21   3    8.11    5.09
  -6  21  -3   23.57    5.81
   6 -21   3   21.52    5.42
  -7  21  -3    0.39    4.74
   7 -21   3   -4.35    4.58
   8 -21   3   -3.33    5.20
   9 -21   3    1.97    5.27
  10  20  -3   -2.66    4.35
  10  20  -3   16.20    4.16
   9  20  -3   -1.46    4.41
   9  20  -3    6.63    3.51
   8  20  -3    2.33    4.45
   8  20  -3    8.34    3.26
   7  20  -3    3.04    4.34
   7  20  -3   14.26    2.61
   7  20  -3   14.46    3.18
   6  20  -3    2.98    2.59
   6  20  -3   -1.31    2.41
   6  20  -3   -3.18    4.21
   5  20  -3    2.64    4.29
   5  20  -3   -2.57    4.20
  -5 -20   3    1.22    3.65
   4  20  -3    3.78    4.08
  -4 -20   3    1.90    3.62
   3  20  -3   -0.29    4.51
  -3 -20   3   -3.31    3.60
   2  20  -3   13.13    4.48
  -2 -20   3   11.52    4.12
   1  20  -3   36.17    5.11
  -1 -20   3   37.36    4.50
   0  20  -3    9.88    4.42
   0 -20   3   11.25    3.87
  -1  20  -3   -2.47    4.51
   1 -20   3    5.88    3.76
  -2  20  -3    9.01    4.48
   2 -20   3   14.39    4.24
  -3  20  -3    2.04    4.15
   3 -20   3    1.14    3.87
  -4  20  -3   -1.69    4.30
   4 -20   3    0.09    4.01
  -5  20  -3    3.22    4.96
   5 -20   3    4.81    4.72
  -6  20  -3    8.72    5.12
   6 -20   3    4.74    4.45
  -7  20  -3    0.55    4.53
   7 -20   3   -1.75    4.29
   8 -20   3   15.96    5.23
   9 -20   3   12.04    5.46
  10 -20   3    7.56    4.69
  10  19  -3   -4.89    4.04
  10  19  -3    5.76    3.54
   9  19  -3    4.07    3.26
   9  19  -3   -1.75    4.15
   8  19  -3    6.34    3.11
   8  19  -3   -2.93    4.04
   7  19  -3   11.41    3.13
   7  19  -3   11.15    2.40
   7  19  -3    6.51    4.28
   6  19  -3    2.90    2.63
   6  19  -3    0.75    2.33
   6  19  -3   -1.32    3.86
  -6 -19   3   -0.14    3.24
   5  19  -3   17.85    4.60
   5  19  -3   24.02    2.99
  -5 -19   3   14.88    3.77
   4  19  -3    4.42    2.17
   4  19  -3    5.47    4.30
  -4 -19   3   -0.39    3.49
   3  19  -3    4.64    4.02
  -3 -19   3    3.11    3.33
   2  19  -3   42.87    5.07
  -2 -19   3   41.03    4.34
   1  19  -3   -2.02    4.35
  -1 -19   3    3.18    3.34
   0  19  -3   11.03    4.73
   0 -19   3    6.74    3.61
  -1  19  -3    6.38    4.21
   1 -19   3   14.14    4.26
  -2  19  -3   20.01    4.47
   2 -19   3   18.37    4.11
  -3  19  -3   -2.82    4.57
   3 -19   3    4.22    3.89
  -4  19  -3   21.97    4.90
   4 -19   3   19.80    4.43
  -5  19  -3   17.60    5.15
   5 -19   3   15.17    4.36
  -6  19  -3    3.47    4.39
   6 -19   3    1.57    4.19
  -7  19  -3    2.68    4.34
   7 -19   3    2.94    4.28
   8 -19   3    4.76    4.28
   9 -19   3    1.84    4.24
  10 -19   3    0.98    4.46
  11  18  -3   13.37    4.31
  11  18  -3   -3.30    4.03
  10  18  -3   -1.23    4.00
  10  18  -3    6.50    3.73
   9  18  -3    8.67    4.34
   9  18  -3   15.94    3.86
   8  18  -3   10.44    4.17
   8  18  -3   17.16    3.64
   7  18  -3    1.73    2.07
   7  18  -3    1.19    2.92
   7  18  -3   -2.45    3.82
   6  18  -3    0.61    3.76
   6  18  -3    5.69    2.72
   6  18  -3    1.41    2.32
  -6 -18   3    2.91    2.86
   5  18  -3    9.60    2.63
   5  18  -3    7.31    4.14
  -5 -18   3    6.01    3.36
   4  18  -3    0.28    2.11
   4  18  -3    0.80    4.06
  -4 -18   3    2.83    3.06
   3  18  -3    0.36    1.92
   3  18  -3    2.33    3.75
  -3 -18   3    1.08    3.44
   2  18  -3   12.92    4.57
   2  18  -3   11.60    1.94
  -2 -18   3   13.73    3.44
   1  18  -3   16.09    4.31
  -1 -18   3   21.80    3.74
   0  18  -3   10.49    4.19
   0 -18   3   14.85    4.06
  -1  18  -3   22.93    4.55
   1 -18   3   16.87    3.87
  -2  18  -3    5.76    4.52
   2 -18   3    3.74    3.60
  -3  18  -3   18.22    4.97
   3 -18   3   17.39    4.04
  -4  18  -3   -3.65    4.03
   4 -18   3   -0.97    3.80
  -5  18  -3    9.66    4.44
   5 -18   3   -0.57    3.89
  -6  18  -3    3.05    4.24
   6 -18   3    0.65    4.08
  -7  18  -3   26.16    4.90
   7 -18   3   19.87    4.52
  -8  18  -3   10.07    6.82
   8 -18   3    8.98    4.31
   9 -18   3   -2.54    4.03
  10 -18   3    7.30    4.81
  11 -18   3    2.09    4.22
  11  17  -3   -4.47    3.84
  11  17  -3   11.97    4.26
  10  17  -3   -0.48    3.57
  10  17  -3    0.18    3.79
   9  17  -3    1.08    3.74
   9  17  -3    4.34    3.35
   8  17  -3    2.01    3.66
   8  17  -3    4.28    1.72
   8  17  -3    9.75    3.22
   8  17  -3    3.67    3.38
   7  17  -3    1.03    3.75
   7  17  -3    9.77    3.13
   7  17  -3    5.32    2.09
   7  17  -3    1.74    2.89
   6  17  -3   24.87    3.55
   6  17  -3   21.56    4.30
   6  17  -3   28.20    2.80
   6  17  -3   28.12    3.40
  -6 -17   3   27.60    3.65
   5  17  -3   23.16    3.88
   5  17  -3   21.61    4.30
   5  17  -3   21.46    2.85
   5  17  -3   18.73    2.91
  -5 -17   3   20.64    3.63
   4  17  -3   17.81    4.33
   4  17  -3   16.69    2.60
  -4 -17   3   15.08    3.29
   3  17  -3    5.29    2.13
   3  17  -3    7.21    4.27
  -3 -17   3    3.98    3.09
   2  17  -3    4.72    3.86
   2  17  -3    1.26    1.78
  -2 -17   3    1.79    3.18
   1  17  -3   -1.98    3.74
  -1 -17   3    4.53    3.29
   0  17  -3    1.42    3.93
   0 -17   3   -3.72    3.12
  -1  17  -3   12.95    4.23
   1 -17   3    7.47    3.69
  -2  17  -3    1.09    3.91
   2 -17   3   -2.54    3.39
  -3  17  -3   55.80    5.18
   3 -17   3   72.85    5.33
  -4  17  -3   56.23    5.23
   4 -17   3   68.26    5.46
  -5  17  -3    1.78    4.01
   5 -17   3   -0.82    3.75
  -6  17  -3   22.35    4.66
   6 -17   3   10.68    4.18
  -7  17  -3    4.20    4.64
   7 -17   3   -3.81    4.25
  -8  17  -3    2.78    4.11
   8 -17   3    2.51    4.01
   9 -17   3    2.81    4.41
  10 -17   3    7.46    4.51
  11 -17   3    1.03    4.54
  12  16  -3   -5.10    3.86
  12  16  -3    6.57    4.27
  11  16  -3    1.30    4.03
  11  16  -3   -5.91    3.75
  10  16  -3   11.52    3.95
  10  16  -3   17.57    4.05
  10  16  -3   16.16    3.45
   9  16  -3    8.07    3.34
   9  16  -3   12.61    3.12
   9  16  -3    9.49    3.90
   8  16  -3   -2.40    3.16
   8  16  -3   -0.23    1.49
   8  16  -3    0.10    3.59
   8  16  -3    3.55    2.69
   7  16  -3    4.83    1.96
   7  16  -3    5.04    2.77
   7  16  -3    1.19    2.87
   7  16  -3    2.70    3.45
  -7 -16   3   -1.13    3.26
   6  16  -3    6.54    2.82
   6  16  -3    4.20    2.75
   6  16  -3    1.59    2.18
   6  16  -3    3.29    3.56
  -6 -16   3    3.92    2.90
   5  16  -3    4.21    2.24
   5  16  -3    3.47    3.33
   5  16  -3    3.51    2.59
   5  16  -3    4.04    2.47
  -5 -16   3   -1.22    2.93
   4  16  -3   30.65    2.99
   4  16  -3   40.45    4.62
   4  16  -3   38.86    4.86
  -4 -16   3   34.85    3.68
   3  16  -3   34.78    3.04
   3  16  -3   44.56    4.85
   3  16  -3   40.55    4.94
  -3 -16   3   40.92    3.91
   2  16  -3    8.04    3.80
   2  16  -3    3.83    2.77
  -2 -16   3    7.31    3.46
   1  16  -3   99.06    5.46
  -1 -16   3  111.40    5.52
   0  16  -3   57.24    4.82
   0 -16   3   51.39    4.49
  -1  16  -3    6.09    3.86
   1 -16   3    6.52    3.42
  -2  16  -3   -2.72    3.80
   2 -16   3    0.54    3.40
  -3  16  -3   13.63    4.33
   3 -16   3   15.00    3.94
  -4  16  -3   -3.26    3.73
   4 -16   3   -6.68    3.58
  -5  16  -3    4.37    3.97
   5 -16   3   -2.43    3.68
  -6  16  -3    6.86    4.01
   6 -16   3    2.67    3.82
  -7  16  -3    8.67    4.35
   7 -16   3    7.29    3.86
  -8  16  -3    9.35    4.56
   8 -16   3    3.47    4.38
   9 -16   3   25.50    4.80
  10 -16   3   10.55    4.04
  11 -16   3   -3.32    3.69
  12 -16   3   -1.12    3.66
  12  15  -3   -2.87    3.74
  12  15  -3    4.04    4.17
  11  15  -3    9.29    4.12
  11  15  -3   -0.59    3.66
  11  15  -3    5.06    2.98
  10  15  -3   -7.30    3.28
  10  15  -3    0.52    2.67
  10  15  -3   -0.85    3.39
   9  15  -3   -2.74    2.97
   9  15  -3    2.18    2.75
   9  15  -3   -2.17    3.37
   8  15  -3   11.43    1.62
   8  15  -3    8.64    2.87
   8  15  -3    7.94    3.67
   8  15  -3   11.72    3.50
   7  15  -3   25.27    4.02
   7  15  -3   30.13    3.62
   7  15  -3   36.49    4.66
   7  15  -3   30.84    2.62
  -7 -15   3   26.66    3.34
   6  15  -3   -1.32    2.01
   6  15  -3    0.77    2.60
   6  15  -3    1.35    3.26
   6  15  -3    1.51    2.58
  -6 -15   3   -1.55    2.74
   5  15  -3   17.91    3.05
   5  15  -3   15.04    4.07
   5  15  -3   16.10    2.50
   5  15  -3   17.64    2.88
  -5 -15   3   18.53    3.26
   4  15  -3   86.91    5.37
   4  15  -3   84.90    5.22
   4  15  -3   73.02    3.96
  -4 -15   3   79.75    4.73
   3  15  -3   19.42    4.20
   3  15  -3   24.07    3.30
  -3 -15   3   25.80    3.32
   2  15  -3    0.55    2.45
   2  15  -3    0.56    3.77
  -2 -15   3   -0.10    2.71
   1  15  -3   -1.85    3.34
   1  15  -3    2.68    2.48
  -1 -15   3    0.95    2.84
   0  15  -3    5.59    3.63
   0 -15   3   14.98    3.19
  -1  15  -3    0.32    3.51
   1 -15   3   -1.36    2.89
  -2  15  -3   41.15    4.67
   2 -15   3   38.74    4.13
  -3  15  -3   43.75    4.71
   3 -15   3   45.49    4.76
  -4  15  -3    8.40    4.42
   4 -15   3    4.31    3.65
  -5  15  -3   24.24    4.35
   5 -15   3   16.29    4.03
  -6  15  -3   22.43    4.82
   6 -15   3   19.94    4.48
  -7  15  -3    4.27    3.86
   7 -15   3    0.76    3.64
  -8  15  -3    7.34    3.90
   8 -15   3    5.57    3.79
   9 -15   3    3.27    3.66
  10 -15   3    1.47    4.02
  11 -15   3    6.15    4.16
  12 -15   3   13.25    4.26
  13  14  -3    7.10    4.53
  13  14  -3   -6.10    3.74
  12  14  -3    3.86    3.09
  12  14  -3    3.48    3.86
  12  14  -3   -4.42    3.59
  11  14  -3    3.85    3.57
  11  14  -3   10.03    3.12
  11  14  -3   18.73    4.39
  10  14  -3   -0.43    2.54
  10  14  -3    1.53    3.57
  10  14  -3    2.38    3.36
   9  14  -3    0.88    3.29
   9  14  -3    7.14    3.28
   9  14  -3    4.15    2.60
   8  14  -3   22.50    1.97
   8  14  -3   16.28    3.76
   8  14  -3   19.50    3.09
   8  14  -3   25.21    3.88
   7  14  -3   -2.50    3.05
   7  14  -3    0.83    2.42
   7  14  -3    0.28    1.76
   7  14  -3   -1.49    2.87
  -7 -14   3   -3.26    2.38
   6  14  -3    3.17    2.02
   6  14  -3    5.14    2.58
   6  14  -3    1.86    2.75
   6  14  -3    4.64    3.37
  -6 -14   3    2.14    2.74
   5  14  -3   20.61    3.91
   5  14  -3   21.05    3.19
   5  14  -3   20.56    3.03
   5  14  -3   20.34    2.54
  -5 -14   3   18.59    2.91
   4  14  -3    5.70    3.29
   4  14  -3    0.69    2.19
   4  14  -3    0.29    2.22
  -4 -14   3    3.35    2.82
   3  14  -3    1.64    2.31
   3  14  -3    1.35    3.45
  -3 -14   3   -0.14    2.47
   2  14  -3   14.18    2.74
   2  14  -3   20.70    3.91
  -2 -14   3   19.52    2.97
   1  14  -3   36.99    4.08
   1  14  -3   33.96    3.85
  -1 -14   3   32.27    3.33
   0  14  -3    0.27    3.17
   0 -14   3   -2.06    2.65
  -1  14  -3   92.83    4.93
   1 -14   3  101.40    4.72
  -2  14  -3    1.47    3.74
   2 -14   3    3.83    2.98
   2 -14   3    3.21    2.28
  -3  14  -3    1.14    3.37
   3 -14   3    2.95    3.18
   3 -14   3    2.35    2.38
  -4  14  -3   -0.40    3.47
   4 -14   3    1.72    3.33
   4 -14   3    2.05    2.72
  -5  14  -3    4.58    4.20
   5 -14   3    1.26    2.86
   5 -14   3    0.13    3.38
  -6  14  -3    8.11    3.83
   6 -14   3    1.67    3.49
   6 -14   3    1.45    3.06
  -7  14  -3   41.66    4.65
   7 -14   3   32.33    4.21
   7 -14   3   35.90    4.62
  -8  14  -3   31.44    4.39
   8 -14   3   22.80    4.06
   8 -14   3   28.03    4.45
   9 -14   3    2.20    3.88
   9 -14   3    0.98    3.36
  10 -14   3    2.97    3.78
  10 -14   3    4.79    3.72
  11 -14   3    1.71    3.69
  12 -14   3    3.09    3.78
  13 -14   3    1.78    3.64
  13  13  -3    8.26    4.60
  13  13  -3   -7.05    3.74
  13  13  -3    5.20    3.22
  12  13  -3    6.30    4.28
  12  13  -3    4.05    3.01
  12  13  -3    0.19    3.52
  11  13  -3   -3.06    3.22
  11  13  -3    2.88    2.76
  11  13  -3    4.79    3.64
  10  13  -3    0.73    2.52
  10  13  -3    2.23    3.31
  10  13  -3    2.92    3.69
   9  13  -3    3.35    3.23
   9  13  -3    3.05    2.55
   9  13  -3    0.85    3.11
   8  13  -3    9.82    2.68
   8  13  -3   11.48    3.48
   8  13  -3    7.59    3.29
   8  13  -3   10.06    1.46
   7  13  -3    0.23    3.09
   7  13  -3    0.68    2.33
   7  13  -3    2.37    3.08
   7  13  -3    0.47    1.66
  -7 -13   3    1.57    2.48
   6  13  -3   32.36    4.21
   6  13  -3   29.18    3.61
   6  13  -3   28.75    2.77
   6  13  -3   27.12    3.73
  -6 -13   3   32.77    3.21
   5  13  -3   24.44    2.97
   5  13  -3   27.95    2.53
   5  13  -3   24.48    2.95
   5  13  -3   31.68    3.95
  -5 -13   3   29.52    2.92
   4  13  -3    1.65    2.11
   4  13  -3    2.30    2.18
   4  13  -3    0.34    3.16
  -4 -13   3    2.32    2.61
   3  13  -3   20.06    2.81
   3  13  -3   25.98    3.75
  -3 -13   3   27.65    3.12
   2  13  -3    1.08    2.06
   2  13  -3   -1.58    3.21
  -2 -13   3    2.68    2.30
   1  13  -3    7.64    2.28
   1  13  -3    6.39    3.10
  -1 -13   3    6.04    2.48
   0  13  -3    6.81    3.17
   0 -13   3    8.18    2.68
  -1  13  -3   26.77    3.70
   1 -13   3   30.18    3.55
  -2  13  -3   -2.41    3.14
   2 -13   3    1.29    2.02
   2 -13   3    2.46    2.84
  -3  13  -3   12.77    3.54
   3 -13   3   11.56    2.61
   3 -13   3   12.25    3.20
  -4  13  -3   43.81    4.43
   4 -13   3   31.51    3.57
   4 -13   3   38.49    4.02
  -5  13  -3   -2.03    3.36
   5 -13   3    1.68    2.64
   5 -13   3   -8.18    3.09
  -6  13  -3   -0.90    3.45
   6 -13   3   -2.10    3.40
   6 -13   3   -0.66    2.76
  -7  13  -3   10.54    3.98
   7 -13   3   12.35    3.70
   7 -13   3    8.19    3.28
  -8  13  -3   12.02    3.95
   8 -13   3   11.73    3.59
   8 -13   3    5.56    3.32
   9 -13   3   -0.35    3.20
   9 -13   3    0.23    3.21
  10 -13   3   10.33    3.48
  10 -13   3   13.01    3.99
  11 -13   3    3.71    3.75
  11 -13   3    2.13    3.21
  12 -13   3    2.32    3.57
  12 -13   3    3.94    4.07
  13 -13   3   11.27    3.72
  13 -13   3   13.58    5.59
  13  12  -3    6.07    4.19
  13  12  -3    1.76    3.78
  13  12  -3   10.32    3.40
  12  12  -3    7.36    3.00
  12  12  -3    6.93    3.96
  12  12  -3    1.84    3.54
  11  12  -3   -2.23    3.20
  11  12  -3    5.21    3.83
  11  12  -3    2.89    2.64
  10  12  -3   20.82    3.17
  10  12  -3   25.76    4.17
  10  12  -3   15.24    3.63
   9  12  -3   43.90    4.53
   9  12  -3   38.23    4.28
   9  12  -3   31.36    3.76
   8  12  -3   -0.05    2.26
   8  12  -3   -1.89    2.94
   8  12  -3    1.51    1.19
   8  12  -3    1.37    3.23
  -8 -12   3   -2.02    2.28
   7  12  -3    0.16    1.56
   7  12  -3    2.40    2.29
   7  12  -3    2.99    3.12
   7  12  -3    1.20    3.06
  -7 -12   3   -0.18    2.52
   6  12  -3    1.38    2.99
   6  12  -3   -2.44    1.72
   6  12  -3   -0.71    2.14
   6  12  -3    1.03    2.80
  -6 -12   3    0.05    2.28
   5  12  -3    2.54    1.84
   5  12  -3    0.33    2.84
   5  12  -3    1.04    2.99
   5  12  -3   -0.40    2.08
   5  12  -3    3.58    2.40
  -5 -12   3   -0.22    2.26
   4  12  -3   31.05    3.57
   4  12  -3   24.40    2.80
  -4 -12   3   31.72    3.00
   3  12  -3   38.27    3.84
   3  12  -3   42.05    3.74
  -3 -12   3   37.74    3.07
   2  12  -3    0.85    2.63
   2  12  -3    0.64    1.87
  -2 -12   3   -1.18    2.33
   1  12  -3   10.23    2.35
   1  12  -3   12.51    3.02
  -1 -12   3    7.97    2.37
   0  12  -3   80.49    4.14
   0 -12   3   92.37    4.29
  -1  12  -3    2.39    2.90
   1 -12   3   -0.59    2.46
  -2  12  -3    3.23    2.90
   2 -12   3    5.80    2.73
   2 -12   3    3.55    2.04
  -3  12  -3   -0.19    2.94
   3 -12   3   -1.22    2.75
   3 -12   3    0.59    2.12
  -4  12  -3    3.87    3.51
   4 -12   3    1.03    3.23
   4 -12   3    3.20    2.37
  -5  12  -3    9.07    3.26
   5 -12   3    6.48    2.67
   5 -12   3    9.94    3.28
[truncated: 1,942,655 more chars]
