# Supplementary material
Source: MDPI journal article supplement (https://www.mdpi.com/2304-6740/6/1/23)
Supplement: s1 [file s1 › species_4.cif]

 
data_rwgs120620
 
_audit_creation_method            SHELXL-97
_chemical_name_systematic
;
 ?
;
_chemical_name_common             ?
_chemical_melting_point           ?
_chemical_formula_moiety          'C14 H31 In N2'
_chemical_formula_sum
 'C14 H31 In N2'
_chemical_formula_weight          342.23
 
loop_
 _atom_type_symbol
 _atom_type_description
 _atom_type_scat_dispersion_real
 _atom_type_scat_dispersion_imag
 _atom_type_scat_source
 'C'  'C'   0.0033   0.0016
 'International Tables Vol C Tables 4.2.6.8 and 6.1.1.4'
 'H'  'H'   0.0000   0.0000
 'International Tables Vol C Tables 4.2.6.8 and 6.1.1.4'
 'N'  'N'   0.0061   0.0033
 'International Tables Vol C Tables 4.2.6.8 and 6.1.1.4'
 'In'  'In'  -0.7276   1.3100
 'International Tables Vol C Tables 4.2.6.8 and 6.1.1.4'
 
_symmetry_cell_setting            'Orthorhombic'
_symmetry_space_group_name_H-M    'P n m a'
_symmetry_space_group_name_Hall   '-P 2ac 2n'
 
loop_
 _symmetry_equiv_pos_as_xyz
 'x, y, z'
 'x+1/2, -y+1/2, -z+1/2'
 '-x, y+1/2, -z'
 '-x+1/2, -y, z+1/2'
 '-x, -y, -z'
 '-x-1/2, y-1/2, z-1/2'
 'x, -y-1/2, z'
 'x-1/2, y, -z-1/2'
 
_cell_length_a                    9.4106(6)
_cell_length_b                    17.6445(12)
_cell_length_c                    10.2584(7)
_cell_angle_alpha                 90.00
_cell_angle_beta                  90.00
_cell_angle_gamma                 90.00
_cell_volume                      1703.4(2)
_cell_formula_units_Z             4
_cell_measurement_temperature     173(2)
_cell_measurement_reflns_used     6910
_cell_measurement_theta_min       2.94
_cell_measurement_theta_max       31.95
 
_exptl_crystal_description        'block'
_exptl_crystal_colour             'colourless'
_exptl_crystal_size_max           0.50
_exptl_crystal_size_mid           0.45
_exptl_crystal_size_min           0.40
_exptl_crystal_density_meas       ?
_exptl_crystal_density_diffrn     1.334
_exptl_crystal_density_method     'not measured'
_exptl_crystal_F_000              712
_exptl_absorpt_coefficient_mu     1.374
_exptl_absorpt_correction_type    'multi-scan'
_exptl_absorpt_correction_T_min   0.5467
_exptl_absorpt_correction_T_max   0.6095
_exptl_absorpt_process_details    'sadabs'
 
_exptl_special_details
;
 ?
;
 
_diffrn_ambient_temperature       173(2)
_diffrn_radiation_wavelength      0.71073
_diffrn_radiation_type            MoK\a
_diffrn_radiation_source          'fine-focus sealed tube'
_diffrn_radiation_monochromator   graphite
_diffrn_measurement_device_type   'Bruker APEX-II CCD'
_diffrn_measurement_method        '\f and \w scans'
_diffrn_detector_area_resol_mean  ?
_diffrn_standards_number          ?
_diffrn_standards_interval_count  ?
_diffrn_standards_interval_time   ?
_diffrn_standards_decay_%         ?
_diffrn_reflns_number             12055
_diffrn_reflns_av_R_equivalents   0.0188
_diffrn_reflns_av_sigmaI/netI     0.0165
_diffrn_reflns_limit_h_min        -14
_diffrn_reflns_limit_h_max        11
_diffrn_reflns_limit_k_min        -26
_diffrn_reflns_limit_k_max        21
_diffrn_reflns_limit_l_min        -15
_diffrn_reflns_limit_l_max        12
_diffrn_reflns_theta_min          2.94
_diffrn_reflns_theta_max          32.04
_reflns_number_total              3035
_reflns_number_gt                 2680
_reflns_threshold_expression      I>2\s(I)
 
_computing_data_collection        'Bruker APEX2'
_computing_cell_refinement        'Bruker SAINT'
_computing_data_reduction         'Bruker SAINT'
_computing_structure_solution     'SHELXS-97 (Sheldrick, 2008)'
_computing_structure_refinement   'SHELXL-97 (Sheldrick, 2008)'
_computing_molecular_graphics     'Bruker SHELXTL'
_computing_publication_material   'Bruker SHELXTL'
 
_refine_special_details
;
 Refinement of F^2^ against ALL reflections.  The weighted R-factor wR and
 goodness of fit S are based on F^2^, conventional R-factors R are based
 on F, with F set to zero for negative F^2^. The threshold expression of
 F^2^ > 2\s(F^2^) is used only for calculating R-factors(gt) etc. and is
 not relevant to the choice of reflections for refinement.  R-factors based
 on F^2^ are statistically about twice as large as those based on F, and R-
 factors based on ALL data will be even larger.
;
 
_refine_ls_structure_factor_coef  Fsqd
_refine_ls_matrix_type            full
_refine_ls_weighting_scheme       calc
_refine_ls_weighting_details
 'calc w=1/[\s^2^(Fo^2^)+(0.0000P)^2^+1.5944P] where P=(Fo^2^+2Fc^2^)/3'
_atom_sites_solution_primary      direct
_atom_sites_solution_secondary    difmap
_atom_sites_solution_hydrogens    geom
_refine_ls_hydrogen_treatment     mixed
_refine_ls_extinction_method      none
_refine_ls_extinction_coef        ?
_refine_ls_number_reflns          3035
_refine_ls_number_parameters      93
_refine_ls_number_restraints      0
_refine_ls_R_factor_all           0.0310
_refine_ls_R_factor_gt            0.0247
_refine_ls_wR_factor_ref          0.0541
_refine_ls_wR_factor_gt           0.0518
_refine_ls_goodness_of_fit_ref    1.296
_refine_ls_restrained_S_all       1.296
_refine_ls_shift/su_max           0.001
_refine_ls_shift/su_mean          0.000
 
loop_
 _atom_site_label
 _atom_site_type_symbol
 _atom_site_fract_x
 _atom_site_fract_y
 _atom_site_fract_z
 _atom_site_U_iso_or_equiv
 _atom_site_adp_type
 _atom_site_occupancy
 _atom_site_symmetry_multiplicity
 _atom_site_calc_flag
 _atom_site_refinement_flags
 _atom_site_disorder_assembly
 _atom_site_disorder_group
C1 C 0.8164(2) 0.7500 -0.0205(2) 0.0219(4) Uani 1 2 d S . .
C2 C 0.6044(2) 0.70748(11) -0.1173(2) 0.0321(4) Uani 1 1 d . . .
H2A H 0.5221 0.6873 -0.0684 0.039 Uiso 1 1 calc R . .
H2B H 0.6021 0.6873 -0.2074 0.039 Uiso 1 1 calc R . .
C3 C 0.77453(19) 0.60664(10) -0.0324(2) 0.0290(4) Uani 1 1 d . . .
C4 C 0.8373(2) 0.59395(12) 0.1032(2) 0.0391(5) Uani 1 1 d . . .
H4A H 0.9308 0.6182 0.1085 0.059 Uiso 1 1 calc R . .
H4B H 0.8472 0.5395 0.1192 0.059 Uiso 1 1 calc R . .
H4C H 0.7741 0.6161 0.1689 0.059 Uiso 1 1 calc R . .
C5 C 0.6381(2) 0.55930(13) -0.0387(3) 0.0551(7) Uani 1 1 d . . .
H5A H 0.5706 0.5777 0.0268 0.083 Uiso 1 1 calc R . .
H5B H 0.6607 0.5060 -0.0213 0.083 Uiso 1 1 calc R . .
H5C H 0.5958 0.5639 -0.1257 0.083 Uiso 1 1 calc R . .
C6 C 0.8744(2) 0.58092(12) -0.1406(2) 0.0401(5) Uani 1 1 d . . .
H6A H 0.8282 0.5881 -0.2253 0.060 Uiso 1 1 calc R . .
H6B H 0.8974 0.5272 -0.1287 0.060 Uiso 1 1 calc R . .
H6C H 0.9620 0.6109 -0.1374 0.060 Uiso 1 1 calc R . .
C7 C 1.1877(2) 0.65391(14) 0.0001(3) 0.0435(5) Uani 1 1 d . . .
H7A H 1.2782 0.6551 0.0472 0.065 Uiso 1 1 calc R . .
H7B H 1.2056 0.6577 -0.0938 0.065 Uiso 1 1 calc R . .
H7C H 1.1383 0.6062 0.0189 0.065 Uiso 1 1 calc R . .
C8 C 1.0133(4) 0.7500 0.2725(3) 0.0441(8) Uani 1 2 d S . .
N1 N 0.73902(14) 0.68824(8) -0.05216(15) 0.0233(3) Uani 1 1 d . . .
In1 In 1.054511(18) 0.7500 0.063035(17) 0.02357(5) Uani 1 2 d S . .
H8A H 1.046(4) 0.705(2) 0.311(4) 0.107(14) Uiso 1 1 d . . .
H8B H 0.916(6) 0.7500 0.296(5) 0.100(19) Uiso 1 2 d S . .
 
loop_
 _atom_site_aniso_label
 _atom_site_aniso_U_11
 _atom_site_aniso_U_22
 _atom_site_aniso_U_33
 _atom_site_aniso_U_23
 _atom_site_aniso_U_13
 _atom_site_aniso_U_12
C1 0.0154(9) 0.0195(10) 0.0308(11) 0.000 0.0045(8) 0.000
C2 0.0255(8) 0.0312(9) 0.0397(10) -0.0035(8) -0.0118(8) -0.0008(7)
C3 0.0206(7) 0.0202(7) 0.0463(11) 0.0023(7) 0.0000(7) -0.0026(6)
C4 0.0417(11) 0.0310(10) 0.0446(11) 0.0131(9) 0.0033(9) 0.0006(9)
C5 0.0297(10) 0.0267(10) 0.109(2) 0.0069(12) -0.0070(13) -0.0095(8)
C6 0.0415(12) 0.0325(10) 0.0463(12) -0.0059(9) 0.0012(9) 0.0085(9)
C7 0.0234(9) 0.0444(12) 0.0628(15) -0.0145(11) -0.0042(9) 0.0076(9)
C8 0.0417(18) 0.066(2) 0.0241(13) 0.000 -0.0029(12) 0.000
N1 0.0167(6) 0.0208(6) 0.0325(7) 0.0003(6) -0.0016(5) -0.0010(5)
In1 0.01796(7) 0.02694(8) 0.02580(8) 0.000 -0.00052(7) 0.000
 
_geom_special_details
;
 All s.u.'s (except the s.u. in the dihedral angle between two l.s. planes)
 are estimated using the full covariance matrix.  The cell s.u.'s are taken
 into account individually in the estimation of s.u.'s in distances, angles
 and torsion angles; correlations between s.u.'s in cell parameters are only
 used when they are defined by crystal symmetry.  An approximate (isotropic)
 treatment of cell s.u.'s is used for estimating s.u.'s involving l.s. planes.
;
 
loop_
 _geom_bond_atom_site_label_1
 _geom_bond_atom_site_label_2
 _geom_bond_distance
 _geom_bond_site_symmetry_2
 _geom_bond_publ_flag
C1 N1 1.3501(19) 7_575 ?
C1 N1 1.3501(19) . ?
C1 In1 2.399(2) . ?
C2 N1 1.472(2) . ?
C2 C2 1.500(4) 7_575 ?
C2 H2A 0.9900 . ?
C2 H2B 0.9900 . ?
C3 N1 1.492(2) . ?
C3 C6 1.524(3) . ?
C3 C4 1.527(3) . ?
C3 C5 1.533(3) . ?
C4 H4A 0.9800 . ?
C4 H4B 0.9800 . ?
C4 H4C 0.9800 . ?
C5 H5A 0.9800 . ?
C5 H5B 0.9800 . ?
C5 H5C 0.9800 . ?
C6 H6A 0.9800 . ?
C6 H6B 0.9800 . ?
C6 H6C 0.9800 . ?
C7 In1 2.205(2) . ?
C7 H7A 0.9800 . ?
C7 H7B 0.9800 . ?
C7 H7C 0.9800 . ?
C8 In1 2.183(3) . ?
C8 H8A 0.94(4) . ?
C8 H8B 0.95(6) . ?
In1 C7 2.205(2) 7_575 ?
 
loop_
 _geom_angle_atom_site_label_1
 _geom_angle_atom_site_label_2
 _geom_angle_atom_site_label_3
 _geom_angle
 _geom_angle_site_symmetry_1
 _geom_angle_site_symmetry_3
 _geom_angle_publ_flag
N1 C1 N1 107.6(2) 7_575 . ?
N1 C1 In1 126.12(10) 7_575 . ?
N1 C1 In1 126.12(10) . . ?
N1 C2 C2 103.33(9) . 7_575 ?
N1 C2 H2A 111.1 . . ?
C2 C2 H2A 111.1 7_575 . ?
N1 C2 H2B 111.1 . . ?
C2 C2 H2B 111.1 7_575 . ?
H2A C2 H2B 109.1 . . ?
N1 C3 C6 109.05(16) . . ?
N1 C3 C4 110.62(16) . . ?
C6 C3 C4 112.42(17) . . ?
N1 C3 C5 109.41(15) . . ?
C6 C3 C5 108.86(19) . . ?
C4 C3 C5 106.41(18) . . ?
C3 C4 H4A 109.5 . . ?
C3 C4 H4B 109.5 . . ?
H4A C4 H4B 109.5 . . ?
C3 C4 H4C 109.5 . . ?
H4A C4 H4C 109.5 . . ?
H4B C4 H4C 109.5 . . ?
C3 C5 H5A 109.5 . . ?
C3 C5 H5B 109.5 . . ?
H5A C5 H5B 109.5 . . ?
C3 C5 H5C 109.5 . . ?
H5A C5 H5C 109.5 . . ?
H5B C5 H5C 109.5 . . ?
C3 C6 H6A 109.5 . . ?
C3 C6 H6B 109.5 . . ?
H6A C6 H6B 109.5 . . ?
C3 C6 H6C 109.5 . . ?
H6A C6 H6C 109.5 . . ?
H6B C6 H6C 109.5 . . ?
In1 C7 H7A 109.5 . . ?
In1 C7 H7B 109.5 . . ?
H7A C7 H7B 109.5 . . ?
In1 C7 H7C 109.5 . . ?
H7A C7 H7C 109.5 . . ?
H7B C7 H7C 109.5 . . ?
In1 C8 H8A 111(2) . . ?
In1 C8 H8B 115(3) . . ?
H8A C8 H8B 102(3) . . ?
C1 N1 C2 112.77(15) . . ?
C1 N1 C3 128.71(15) . . ?
C2 N1 C3 118.50(14) . . ?
C8 In1 C7 112.89(9) . 7_575 ?
C8 In1 C7 112.89(9) . . ?
C7 In1 C7 100.52(13) 7_575 . ?
C8 In1 C1 100.70(12) . . ?
C7 In1 C1 115.23(7) 7_575 . ?
C7 In1 C1 115.23(7) . . ?
 
loop_
 _geom_torsion_atom_site_label_1
 _geom_torsion_atom_site_label_2
 _geom_torsion_atom_site_label_3
 _geom_torsion_atom_site_label_4
 _geom_torsion
 _geom_torsion_site_symmetry_1
 _geom_torsion_site_symmetry_2
 _geom_torsion_site_symmetry_3
 _geom_torsion_site_symmetry_4
 _geom_torsion_publ_flag
N1 C1 N1 C2 4.0(3) 7_575 . . . ?
In1 C1 N1 C2 -172.14(15) . . . . ?
N1 C1 N1 C3 -177.57(12) 7_575 . . . ?
In1 C1 N1 C3 6.3(3) . . . . ?
C2 C2 N1 C1 -2.42(17) 7_575 . . . ?
C2 C2 N1 C3 178.97(13) 7_575 . . . ?
C6 C3 N1 C1 -80.6(3) . . . . ?
C4 C3 N1 C1 43.6(3) . . . . ?
C5 C3 N1 C1 160.5(2) . . . . ?
C6 C3 N1 C2 97.80(19) . . . . ?
C4 C3 N1 C2 -138.08(17) . . . . ?
C5 C3 N1 C2 -21.2(3) . . . . ?
N1 C1 In1 C8 92.29(19) 7_575 . . . ?
N1 C1 In1 C8 -92.29(19) . . . . ?
N1 C1 In1 C7 -29.5(2) 7_575 . . 7_575 ?
N1 C1 In1 C7 145.93(19) . . . 7_575 ?
N1 C1 In1 C7 -145.93(19) 7_575 . . . ?
N1 C1 In1 C7 29.5(2) . . . . ?
 
_diffrn_measured_fraction_theta_max    0.994
_diffrn_reflns_theta_full              32.04
_diffrn_measured_fraction_theta_full   0.994
_refine_diff_density_max    0.992
_refine_diff_density_min   -1.700
_refine_diff_density_rms    0.074
